# Supplementary material for: Gold and titania nanoparticles accumulated in the body induce late toxic effects and alterations in transcriptional and miRNA landscape
Source: Royal Society of Chemistry journal article supplement (doi:10.1039/d3en00954h), 2024-01-01
Supplement: d3en00954h1.pdf [file d3en00954h1.pdf]

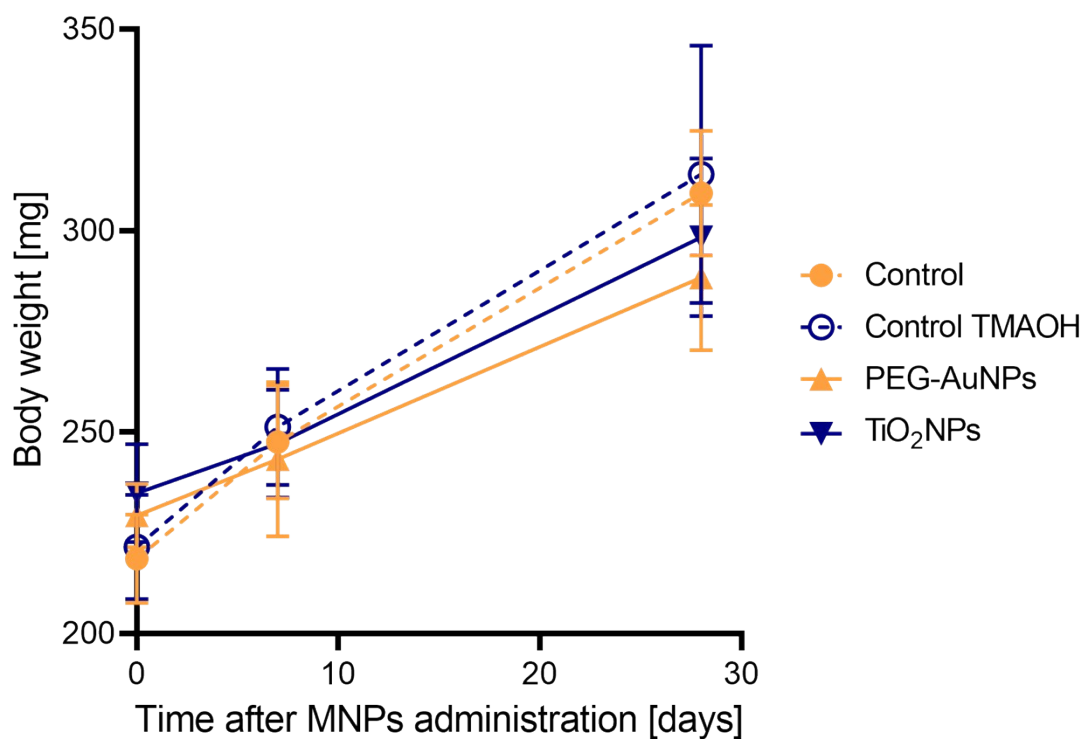

**Figure S1** Body weight of control and MNPs-exposed rats 7 days and 28 days after injection. Results are expressed as mean  $\pm$  SEM.
