# Supplementary material for: Gold and titania nanoparticles accumulated in the body induce late toxic effects and alterations in transcriptional and miRNA landscape
Source: Royal Society of Chemistry journal article supplement (doi:10.1039/d3en00954h), 2024-01-01
Supplement: d3en00954h2.pdf [file d3en00954h2.pdf]

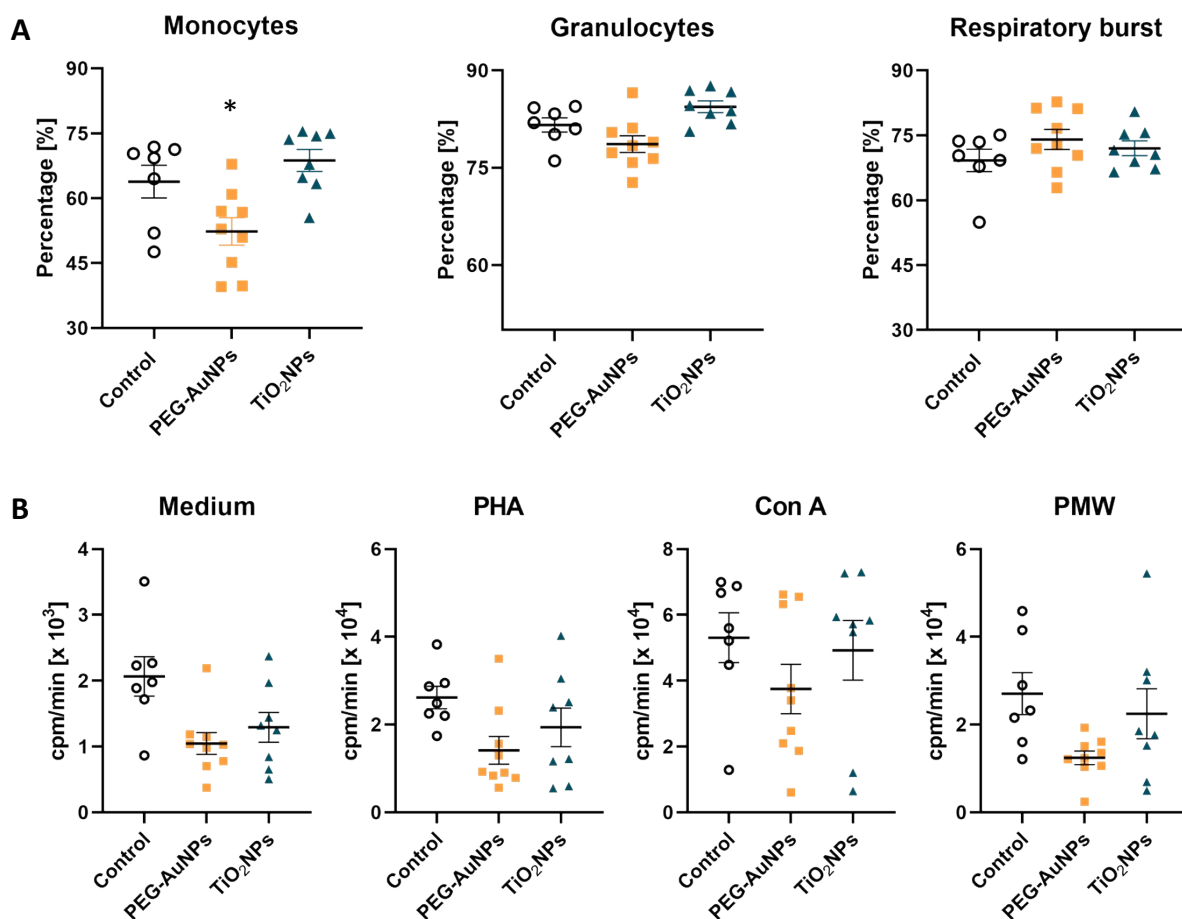

**Figure S2** Phagocytic activity and respiratory burst of blood leukocytes in rats 28 days after single *iv* application of PEG-AuNPs and TiO<sub>2</sub>NPs (A). Proliferative activity of rat splenocytes 28 days after *iv* application of PEG-AuNPs and TiO<sub>2</sub>NPs (B). Results are expressed as mean ± SEM. \*p < 0.05.
