# Supplementary material for: Gold and titania nanoparticles accumulated in the body induce late toxic effects and alterations in transcriptional and miRNA landscape
Source: Royal Society of Chemistry journal article supplement (doi:10.1039/d3en00954h), 2024-01-01
Supplement: d3en00954h3.pdf [file d3en00954h3.pdf]

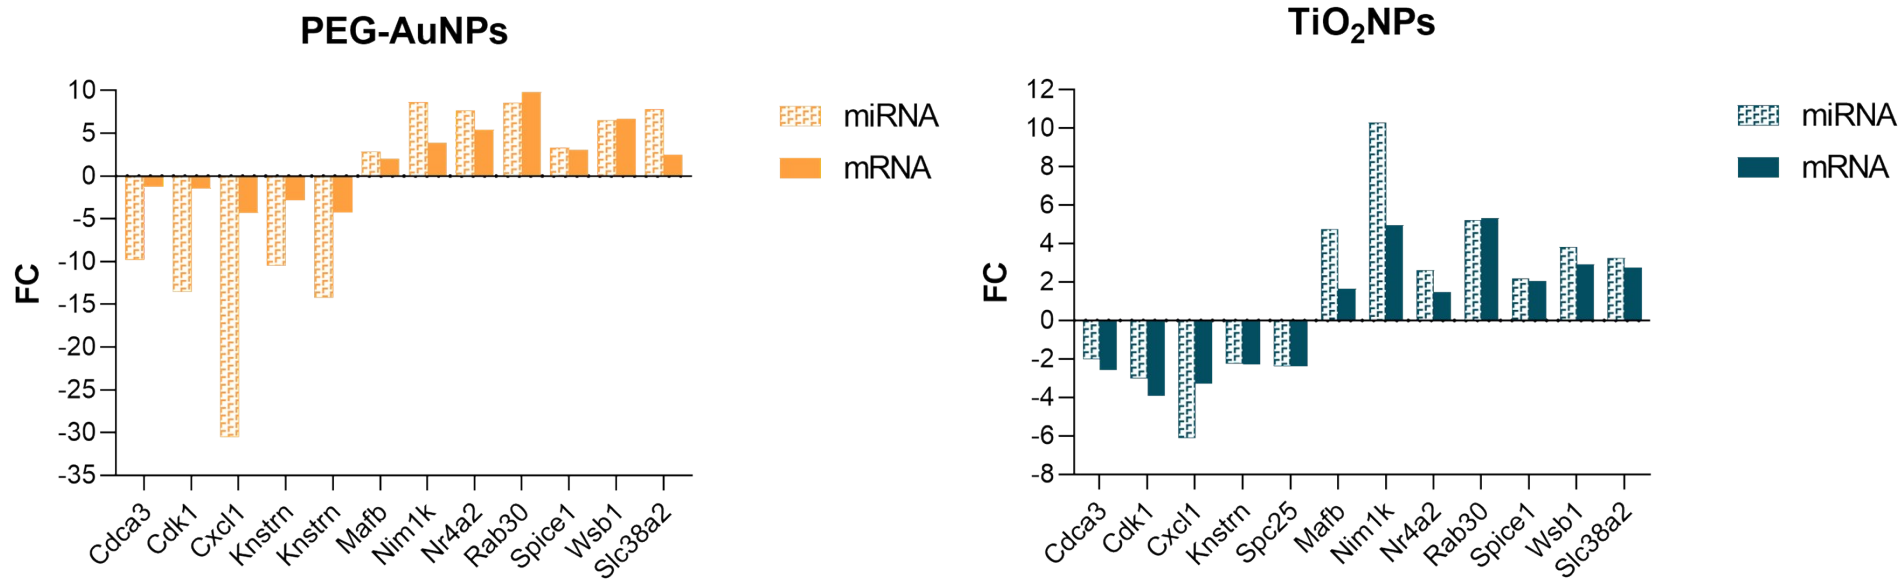

**Figure S3** Validation of selected gene expression in the liver 28 days after MNPs exposure by qRT-PCR.
