# Supplementary material for: Gold and titania nanoparticles accumulated in the body induce late toxic effects and alterations in transcriptional and miRNA landscape
Source: Royal Society of Chemistry journal article supplement (doi:10.1039/d3en00954h), 2024-01-01
Supplement: d3en00954h4.pdf [file d3en00954h4.pdf]

**Table S1** Primer sequences for quantitative qRT-PCR

| <b>Gene</b>   |      | <b>Primer sequence</b>     |
|---------------|------|----------------------------|
| <i>Cdca3</i>  | RT-F | TCCCCAGTCCTCAGGTTCTA       |
|               | RT-R | CATTTTCACTTAGGGCAGAAGG     |
| <i>Cdk1</i>   | RT-F | GCAGGACTACAAGAACAACACTTTCC |
|               | RT-R | AGAGATTCGTTTGGCTGGAT       |
| <i>Cxcl1</i>  | RT-F | TCCAGAGTTTGAAGGTGATGC      |
|               | RT-R | GGGGACACCCTTTAGCATCT       |
| <i>Knstrn</i> | RT-F | GACCTGACACAGAAGGTGGAG      |
|               | RT-R | TGTGCTGGGTTCTCTGCTTT       |
| <i>Spc25</i>  | RT-F | GAAAGATTCCTGGTGATAAGCTG    |
|               | RT-R | TCAAGATGAGGTGAACAGTCG      |
| <i>Mafb</i>   | RT-F | TCCAGCAGAAACATCACCTG       |
|               | RT-R | TCTCGCACTTGACCTGTAGG       |
| <i>Nim1k</i>  | RT-F | GAGATCGGAAGCGGAACTT        |
|               | RT-R | GGATAACAGCCTTTGGGTTTT      |
| <i>Nr4a2</i>  | RT-F | AAGAAGTGGTTCGCACGGA        |
|               | RT-R | TTGCCTGGAACCTGGAATAG       |
| <i>Rab30</i>  | RT-F | CAGGTCAAGGAGCCACAAT        |
|               | RT-R | GGGTGATGGAGCGAAATCT        |
| <i>Rnd2</i>   | RT-F | TGTGGGATACTTCAGGTTCTC      |
|               | RT-R | CTCCTTGCCACTTCTTGAGG       |
| <i>Spice1</i> | RT-F | TGGAAGAAGCAGAAACCAGAA      |
|               | RT-R | CGAGGAACATCAACAAACAGA      |
| <i>HPRT1</i>  | RT-F | AAGTTCTTTGCTGACCTGCTG      |
|               | RT-R | AGACGTTCTTTCCAGTTAAAGTTG   |
| <i>LDHA</i>   | RT-F | AGGAGCAGTGGAAAGGATGTG      |
|               | RT-R | ATCATGGTGGAAATGGGATG       |
