# Supplementary material for: Gold and titania nanoparticles accumulated in the body induce late toxic effects and alterations in transcriptional and miRNA landscape
Source: Royal Society of Chemistry journal article supplement (doi:10.1039/d3en00954h), 2024-01-01
Supplement: d3en00954h5.xlsx [file d3en00954h5.xlsx]

## Sheet: miRNA-mRNA Lung
AuNPs	miRNA	Target	FC	No. of database				TiO2NPs	miRNA	Target	FC	No. of database
up	rno-miR-450b-3p	SCD	-4.45	1				up	rno-miR-223-3p	ATP2B1	-2.28	1
down	rno-miR-6216	CCR5	1.89	1						CELF2	-3.18	1
		EPHA6	2.16	1						Clec12b	-3.28	2
		GMPS	1.81	1						Fam83d	-3.15	2
		HEMGN	1.92	1						FAT1	-3.07	3
		KCTD7	2.61	1						Itpr1	-2.29	2
		KRTAP12-2	1.86	1						Lrrc4	-3.15	2
		Lats1	2.41	2						Pcsk1	-3.67	2
		MAD2L1	3.74	1						PHF20L1	-2.71	3
		PDK4	4.03	1						POU2F1	-2.63	1
		PIWIL2	2.41	1						Ptk2	-2.58	2
		PPARGC1B	1.89	1						RERG	-2.53	1
		PRND	2.47	1						Rnf14	-1.94	2
		RBM33	2.02	1						Usp6nl	-2.56	2
		SYNPO2L	2.61	3					rno-miR-144-5p	ACTG1	-2.67	3
		SYT14	1.85	1						ANKRD33B	-2.63	1
		TMEM241	3.16	1						ATP7A	-3.27	1
										BMPER	-2.89	1
										CELF2	-3.18	1
										CUL3	-3.28	1
										DCUN1D1	-2.75	1
										DST	-1.99	1
										FAT1	-3.07	1
										IL34	-2.72	1
										ITPR1	-2.29	1
										IWS1	-2.93	1
										KCNC3	-8.86	1
										KLHL9	-1.99	1
										LRRC8C	-3.98	1
										MAGI1	-2.79	1
										MCOLN3	-2.65	1
										NCOA1	-2.58	1
										Nexmif	-5.26	2
										PRKCE	-2.31	1
										PRR5L	-3.28	1
										RBFOX2	-3.37	1
										SYNJ1	-2.43	1
										TECTB	-3.87	1
										TMEM106A	-2.16	3
										TTF2	-2.91	1
										UBN2	-2.17	1
									rno-miR-299a-3p	CUL3	-3.28	1
										DCUN1D1	-2.75	3
										Dnm3	-2.91	2
										Fam122b	-3.6	1
										CHST2	-3.8	1
										Iqsec2	-3.14	2
										PAXBP1	-2.16	1
										VEGFA	-3.59	3
									rno-miR-486	Adcy7	-4.2	2
										CELF2	-3.18	1
										Clec12b	-3.28	2
										GXYLT1	-2.13	1
										PHF20L1	-2.71	1
										POU2F1	-2.63	1
										PRRC2C	-2.64	1
										Slain1	-4.2	2
										STK4	-2.82	3
									rno-miR-451-5p	Celf2	-3.18	2
										Ybx1	-2.31	2
								down	rno-miR-29b-5p	ARID3A	2.8	1
										EGR1	3.09	1
										GNS	2.16	1
										MED29	2.5	1
										NPAS2	2.1	1
										PPM1K	5.28	1
										RHBDL3	2.46	1
										SPCS3	3.63	1
										SV2C	2.81	1
										SZRD1	2.23	1
										TMEM106B	2.97	1
										TVP23B	2.36	3
										UBD	17.73	1

## Sheet: miRNA-mRNA Liver
AuNPs	miRNA	Target	FC	No. of database				TiO2NPs	miRNA	Target	FC	No. of database
up	rno-miR-1949	AAGAB	-1.54	1				up	rno-miR-135b-3p	ACACA	-2.84	1
		ACACA	-4.77	1						CALU	-2.01	1
		ACLY	-12.58	1						CINP	-1.76	1
		ACTG1	-1.77	1						CXCL9	-1.74	1
		ALG13	-1.7	1						DCN	-2.34	1
		ARHGAP35	-2.04	1						GNAT1	-2.27	1
		ARHGEF9	-2.19	1						MYCT1	-1.72	1
		ARPP21	-1.54	1						NDST1	-1.89	1
		ATP2B4	-2.46	1						OTUB2	-2.16	1
		BCL6B	-2.38	1						PANK3	-1.62	1
		BICC1	-1.92	1						PLXNA2	-1.67	1
		BORA	-2.31	1						PPFIBP2	-1.51	1
		CAV2	-6.44	1						Rtkn	-4.2	3
		CBX1	-1.73	1						SCD	-12.4	1
		Ccdc51	-1.61	3						SNAI2	-2.42	1
		CCDC80	-1.72	1						STAT1	-2.07	1
		CCNA2	-12.33	1						TUBB6	-2.78	1
		CD274	-1.97	1						XPNPEP2	-1.6	1
		Cdca3	-9.77	3					rno-miR-125b-1-3p	SECISBP2L	-1.71	1
		CDK5RAP3	-1.6	1						STAT1	-2.07	1
		CEP78	-2.08	1					rno-miR-3558-3p	ACACA	-2.84	1
		Clcn4	-1.69	3						ACLY	-4.91	1
		CORO2A	-1.62	1						ADAL	-2.02	1
		CRYZ	-1.54	1						ARRDC3	-4.21	1
		CS	-1.64	1						BAG2	-1.67	1
		DBF4	-1.89	1						CALR	-1.83	1
		DERL3	-1.88	1						CALU	-2.01	1
		DLGAP5	-3	1						CXCL9	-1.74	1
		DTX4	-2.42	1						DLAT	-1.69	1
		EMP1	-2.23	1						ELOVL6	-10.41	1
		F2RL2	-3.56	1						EPHA3	-2.53	1
		FOCAD	-1.51	1						EPHX1	-2.06	1
		FSTL1	-1.81	1						FAM53B	-2.69	1
		FSTL3	-2.93	1						Fasn	-6.81	2
		GBE1	-2.04	1						FCGR3A	-1.64	1
		GPRIN3	-2.1	1						FYCO1	-2.58	1
		HFE	-2.37	1						GPRIN3	-1.91	1
		HMGN3	-1.93	1						GUCY1A2	-1.73	1
		HSPA12B	-1.91	1						HYOU1	-1.73	1
		CHD9	-2.03	1						IL13RA1	-1.66	3
		CHDH	-1.85	1						KNSTRN	-2.26	1
		CHIC1	-1.73	1						MBLAC2	-2.18	1
		IL18BP	-1.93	1						ME1	-4.79	1
		KATNBL1	-2.76	1						MEIS1	-1.76	1
		KCNN2	-2.63	1						MRPS27	-1.59	1
		KHK	-1.63	1						NUCB1	-1.85	1
		KIF18B	-4.56	1						POLR2M	-2.01	1
		LBR	-1.98	1						PPARD	-2.52	1
		LDLR	-1.86	1						SEC61A1	-1.76	1
		LGSN	-6.27	1						SECISBP2L	-1.71	1
		Lmod2	-1.98	3						SET	-2.07	1
		Lrat	-2.09	3						SIX5	-1.93	1
		MAP10	-1.83	1						SLC25A44	-1.59	1
		MCF2L	-1.99	1						TFRC	-1.59	1
		Myadm	-2.05	3						TMEM97	-1.68	1
		NBEAL1	-1.69	1						UBA5	-1.52	1
		Ndufaf7	-1.89	3					rno-miR-6328	AACS	-4.37	1
		NIPAL2	-2.62	1						ACACA	-2.84	1
		NTF3	-2.64	1						ADAMTS2	-1.62	1
		OTUB2	-2.82	1						ASPA	-3.28	1
		PDP2	-1.75	1						ATP6V0A1	-1.69	1
		PGM3	-2.08	1						AVPI1	-1.66	3
		Plcl1	-1.55	3						BHLHA15	-2.59	1
		PLXNA2	-2.17	1						CALU	-2.01	1
		PPP1R3B	-12.15	1						COMT	-1.77	1
		PPP1R9A	-2.85	1						CXCL9	-1.74	1
		PRTFDC1	-2.71	1						ELOVL6	-10.41	1
		RCAN1	-1.78	1						FAM210B	-1.55	1
		REPIN1	-1.58	1						FAM53B	-2.69	1
		RPS6KA6	-2.72	1						FYCO1	-2.58	1
		SBSPON	-2.54	1						GNAT1	-2.27	1
		SC5D	-2.14	1						GPAM	-1.67	1
		SEC14L4	-2.41	1						HES6	-2.62	1
		SENP8	-1.68	1						LSS	-2.53	1
		SLC26A2	-2.38	1						MEIS1	-1.76	1
		SLC31A1	-1.77	1						MVD	-3.31	1
		SLC36A4	-2.53	1						NDST1	-1.89	1
		SLC38A7	-1.74	1						NUCB1	-1.85	1
		SLCO5A1	-1.87	1						OTUB2	-2.16	1
		SMS	-1.63	1						PANK3	-1.62	1
		SSR2	-1.79	1						PLXNA2	-1.67	1
		SSR3	-1.7	1						PPFIBP2	-1.51	1
		STXBP4	-2.33	1						RARG	-1.86	1
		SUMF2	-1.53	1						SIX5	-1.93	1
		SVIP	-1.93	1						SLC25A44	-1.59	1
		Tlcd1	-3.23	3						STAT1	-2.07	1
		TMED7	-1.74	1						UBD	-2.48	1
		TNFSF13	-2.02	1					rno-miR-3084a-3p	ACACA	-2.84	1
		TRIM45	-1.69	1						ATP6V0A1	-1.69	1
		TRIM59	-2.56	1						BHLHA15	-2.59	1
		WDYHV1	-2.08	1						CCDC62	-1.76	1
		ZIK1	-2.23	1						COMT	-1.77	1
		ZRANB3	-2.31	1						CXCL9	-1.74	1
down	rno-miR-203a-3p	ABLIM3	6.21	1						DDX17	-1.53	1
		ADCY9	2.35	1						Fads1	-1.82	3
		AFF4	1.69	3						FAM53B	-2.69	1
		ARHGEF3	1.74	3						FKBP11	-1.65	1
		Bcl2l11	2.5	2						FLNA	-1.55	1
		BCL2L2	1.93	1						GPRIN3	-1.91	1
		Bicral	2.09	2						HES6	-2.62	1
		CCNG2	1.81	3						Hyou1	-1.73	3
		CREBRF	2	3						IL13RA1	-1.66	1
		CREBZF	1.76	3						IRAK1	-1.57	1
		Dcaf6	1.73	2						KIFC3	-1.6	1
		Ddx3	1.67	2						MEIS1	-1.76	1
		DDX3X	1.98	1						MRPS27	-1.59	1
		DST	1.81	1						MYADM	-1.74	1
		DYRK1A	1.55	1						NDST1	-1.89	1
		EBF2	1.97	3						NUSAP1	-2.29	1
		ELL2	2.66	1						OTUB2	-2.16	1
		ETS2	2.62	1						PITPNB	-1.76	1
		EYA4	4.24	3						PKLR	-2.24	1
		FOXK1	1.89	1						PLEC	-1.76	1
		Gabarapl1	2.69	2						POPDC2	-1.82	1
		GXYLT1	1.92	3						PPARD	-2.52	1
		HADHB	1.8	3						RDH11	-1.81	1
		HCN4	1.98	1						SCD	-12.4	1
		HDAC8	1.83	1						Scd2	-3.77	2
		Hnf4g	1.62	2						Serpinb8	-2.91	3
		Ikzf5	1.97	2						SFTPC	-2.57	1
		IL6ST	1.96	1						SNW1	-1.57	1
		IMPACT	2.72	3						SREBF1	-1.81	1
		IRS2	7.83	3						TINF2	-1.59	1
		Itpr2	1.62	2						UBD	-2.48	1
		KCNN3	1.52	1					rno-miR-1843b-3p	ACACA	-2.84	1
		KMO	2.01	1						ELOVL6	-10.41	1
		LATS2	1.6	3						GCK	-5.14	1
		MAFB	3.1	1						GEMIN5	-1.89	1
		MAPK8	1.79	1						GPRIN3	-1.91	1
		MBNL3	2.26	1						MEIS1	-1.76	1
		MEF2C	2.81	1						SCLY	-1.77	1
		Mzf1	1.51	2						SECISBP2L	-1.71	1
		NFIL3	3.53	3						SLC25A44	-1.59	1
		NR5A2	1.64	1						TINF2	-1.59	1
		NUFIP2	1.74	1					rno-miR-409a-3p	AACS	-4.37	1
		NUMBL	1.65	1						ARRDC3	-4.21	1
		OSBPL8	1.61	3						BAG2	-1.67	1
		PDE4D	2.65	1						CYP7A1	-3.58	1
		PPP1R12A	2.39	1						ELOVL6	-10.41	1
		PPTC7	3.28	3						FAM53B	-2.69	1
		PROX1	2.47	1						GPRIN3	-1.91	1
		RAB3IP	1.58	1						GUCY1A2	-1.73	1
		RABGEF1	2.17	1						IL13RA1	-1.66	1
		RAPGEF4	2.32	1						PDCD4	-1.64	1
		RBM47	1.8	1						PPFIBP2	-1.51	1
		RBMS1	1.66	1						TUBA1A	-1.71	1
		SEMA6A	3.31	1						TUBB6	-2.78	1
		SETD1B	1.69	1					rno-miR-3085	CALU	-2.01	1
		SIK1	5.63	1						Flna	-1.55	2
		Slc38a2	7.8	2						Fyco1	-2.58	2
		SLC4A4	2.81	1						Ndst1	-1.89	3
		Smim13	3.82	2						Plxna2	-1.67	2
		SNX18	1.56	1						STAT1	-2.07	1
		SOCS3	3.07	1					rno-miR-32-3p	ADAMTS2	-1.62	1
		SOCS7	1.6	1						ATP6V0A1	-1.69	1
		SON	1.65	1						Bpnt2	-1.72	1
		Spag6	2.04	1						CALU	-2.01	1
		SPTSSA	1.73	1						CRELD2	-1.83	3
		TAF5	1.94	1						DCN	-2.34	1
		TCF7L2	1.56	3						DDX17	-1.53	1
		Tmx4	2.08	2						DLAT	-1.69	1
		TSC22D2	1.9	1						DNM1L	-1.95	1
		Tshz3	2.88	2						ELOVL5	-1.85	1
		TXLNG	1.68	1						FAM53B	-2.69	1
		VEGFA	1.8	3						GPAM	-1.67	1
		Wasf1	2.08	2						GPRIN3	-1.91	1
		WDFY3	1.94	3						GUCY1A2	-1.73	1
		Wsb1	6.57	2						HSPA5	-1.58	1
		Zbtb11	1.68	2						KIF20A	-2.66	1
		ZMYM2	1.61	1						KNSTRN	-2.26	1
										MBLAC2	-2.18	3
										MYCT1	-1.72	1
										NSDHL	-1.88	1
										PANK3	-1.62	3
										PDCD4	-1.64	1
										PLXNA2	-1.67	1
										PRSS53	-1.93	1
										RUFY2	-1.74	1
										SECISBP2L	-1.71	1
										SGK2	-1.61	1
										SKA2	-2.51	1
										SNAI2	-2.42	1
										SNW1	-1.57	1
										TFG	-1.93	1
										TFRC	-1.59	1
										TK1	-2.65	1
										TMEM97	-1.68	1
										YTHDF3	-2.02	3
									rno-miR-3564	ACSS2	-2.5	1
										ARRDC3	-4.21	1
										ASPA	-3.28	1
										CCDC62	-1.76	1
										CXCL1	-6.13	1
										CYB5B	-1.71	1
										CYSTM1	-2.21	1
										DNM1L	-1.95	1
										ELOVL5	-1.85	1
										ELOVL6	-10.41	1
										EPHA3	-2.53	1
										FADS1	-1.82	1
										FAM210B	-1.55	1
										FAM53B	-2.69	1
										FLNA	-1.55	1
										FYCO1	-2.58	1
										GPAM	-1.67	1
										GPRIN3	-1.91	1
										GUCY1A2	-1.73	1
										GYPC	-1.53	1
										HEBP2	-2.23	1
										HYOU1	-1.73	1
										IL13RA1	-1.66	1
										MBLAC2	-2.18	3
										ME1	-4.79	1
										MYADM	-1.74	1
										MYCT1	-1.72	3
										NDST1	-1.89	1
										OTUB2	-2.16	1
										PANK3	-1.62	1
										POPDC2	-1.82	1
										RARG	-1.86	1
										SERPINB8	-2.91	1
										SF3A2	-1.95	1
										SIX5	-1.93	1
										Ska2	-2.51	2
										SLC25A44	-1.59	1
										STAT1	-2.07	1
										TFRC	-1.59	1
										TUBA1B	-1.81	3
										YTHDF3	-2.02	1
										ZDHHC2	-1.81	1
									rno-miR-466c-5p	ACMSD	-2.77	1
										CYB5B	-1.71	1
										DDX17	-1.53	1
										ELOVL6	-10.41	1
										FASN	-6.81	1
										GUCY1A2	-1.73	1
										HEBP2	-2.23	1
										Meis1	-1.76	3
										MKI67	-5.17	1
										NDST1	-1.89	1
										PITPNB	-1.76	1
										PLXNA2	-1.67	1
										PYCR1	-1.8	1
										RUFY2	-1.74	1
										SAPCD2	-2.35	1
										SCLY	-1.77	1
										SET	-2.07	1
										SNAI2	-2.42	1
										STAT1	-2.07	1
										TFG	-1.93	1
										TFRC	-1.59	1
										TINF2	-1.59	1
										TUBB6	-2.78	1
									rno-miR-465-5p	ARRDC3	-4.21	1
										Bag2	-1.67	2
										CALU	-2.01	1
										CXCL9	-1.74	1
										CYP7A1	-3.58	1
										CYSTM1	-2.21	1
										DCN	-2.34	1
										Dlat	-1.69	3
										DNM1L	-1.95	1
										ELOVL6	-10.41	1
										FAM53B	-2.69	1
										FCGR3A	-1.64	1
										GPAM	-1.67	1
										GPRIN3	-1.91	1
										GUCY1A2	-1.73	1
										HEBP2	-2.23	1
										IL13RA1	-1.66	1
										MBLAC2	-2.18	1
										MYCT1	-1.72	1
										Pank3	-1.62	3
										PDCD4	-1.64	1
										POPDC2	-1.82	1
										SECISBP2L	-1.71	1
										SERPINB8	-2.91	1
										Set	-2.07	3
										Ska2	-2.51	2
										SLC23A1	-1.82	1
										SLC35B1	-1.54	1
										STAT1	-2.07	1
										TFG	-1.93	1
										UBA5	-1.52	1
								down	rno-miR-203a-3p	ADAMTS15	2.64	3
										ATP10D	2.26	1
										GXYLT1	2.14	3
										Hrk	4.34	2
										IL6ST	1.91	1
										Itpr2	2.28	2
										KDM6A	2.6	1
										LRRC28	1.71	1
										MAFB	4.78	1
										NLK	1.62	3
										Pcmtd1	2	2
										PIM3	3.03	3
										PPP1CB	1.65	1
										PPTC7	2.29	3
										PTP4A1	1.8	3
										PTPN4	1.66	3
										ROBO2	1.72	3
										SESN2	2.22	1
										SGIP1	3.17	1
										Slc25a21	1.73	2
										Slc38a2	3.26	2
										SP2	2.37	1
										TAF5	1.67	1
										TFDP2	1.68	1
										TSC22D3	1.64	1
										WDFY3	1.84	3
										Wsb1	3.82	2
									rno-miR-342-3p	DMRTA2	2.48	1
										Fcsk	1.73	1
										GOLM1	1.74	1
										Gpr68	1.9	2
										GXYLT1	2.14	3
										Hhex	2.15	2
										Itpr2	2.28	2
										Pom121	1.65	2
										Ppm1k	2.19	2
										RASSF1	1.92	1
										Spag7	2.74	2
										TFDP2	1.68	3
									rno-miR-128-3p	Atoh8	1.79	2
										CPD	1.63	1
										CSRNP1	2.46	1
										CTDSPL	1.67	1
										DAB2IP	1.67	1
										DIRAS1	1.9	3
										Fam91a1	1.53	2
										Foxa3	2.21	2
										FOXN3	2.16	1
										GOLM1	1.74	1
										HECTD1	1.55	1
										HIVEP3	2.03	1
										INSR	2.1	1
										JMJD1C	1.76	1
										KPNA5	1.86	1
										LOC680039	1.65	2
										Lpar2	1.86	2
										MEPCE	1.62	1
										MFSD2A	3.46	1
										NR2F6	3.49	3
										NRBF2	2.04	3
										NUS1	4.17	3
										PDIA5	1.81	3
										PGM2L1	1.55	1
										Pom121	1.65	2
										PPARG	1.79	3
										PTPN4	1.66	3
										RAD51D	1.67	3
										RAI14	1.57	1
										Rgs1	2.81	2
										RIMS3	2.16	1
										RREB1	1.59	1
										Scml4	2.04	2
										Slc25a16	1.53	2
										Slc25a21	1.73	2
										Slc29a4	4.68	2
										SP2	2.37	1
										WSB1	3.82	3
									rno-miR-125b-5p	ADAMTS15	2.64	1
										ANKRD50	2.02	1
										ATL2	1.61	1
										ATOH8	1.79	1
										ATP10D	2.26	1
										Atp7a	1.67	2
										Cbx7	2.08	3
										CCDC71L	2.68	1
										Crem	2.57	2
										Cxcl12	1.73	2
										DIRAS1	1.9	1
										DOCK3	2.89	1
										FOXN3	2.16	1
										Gxylt1	2.14	3
										Ier2	1.7	3
										KCNH1	4.99	1
										KLHL24	1.59	1
										MICALL1	1.81	1
										Mip	1.64	3
										Pctp	1.65	3
										Pde7a	2.35	3
										POM121	1.65	1
										Recql5	1.74	3
										RREB1	1.59	1
										Rtn4rl1	2.15	2
										Slc46a3	1.84	3
										Vps37b	2.06	3

## Sheet: miRNA-mRNA Kidney
AuNPs	miRNA	Target	FC	No. of database				TiO2NPs	miRNA	Target	FC	No. of database
up	rno-miR-301a-3p	Slc26a4	-9.34	2				up	rno-miR-374-5p	BZW1	-1.9	1
		ZDHHC2	-3.09	1						Kif20a	-2.94	2
	rno-miR-18a-5p	N/A								Mpdz	-3.75	2
	rno-miR-32-5p	N/A								Slc12a2	-2.48	2
	rno-miR-340-5p	Med28	-3.19	3						SPPL2A	-1.77	1
		MTHFD2	-3.14	1						WNT2B	-2.04	1
		RHOC	-3.81	1					rno-miR-542-3p	Arpc1a	-1.64	2
	rno-miR-182	Abcb10	-2.6	2						COPS2	-2.01	1
		Zdhhc2	-3.09	3						Decr2	-1.87	2
	rno-miR-96-5p	ZDHHC2	-3.09	1						Eif2b1	-1.72	2
	rno-miR-183-5p	N/A								Eno1	-1.8	2
down	rno-miR-494-3p	ATRX	2.62	1						Gstt3	-1.88	2
		Hdac8	3.68	2						Per2	-2.04	2
		Marc1	7.12	1						PPP1CB	-1.97	1
		Ms4a6bl	5.85	2						Selenof	-1.84	2
		Nsg1	2.93	2						Srp72	-1.88	2
		SHANK3	4.63	1					rno-miR-450b-5p	N/A
	rno-miR-3075	AKAP5	6.57	1					rno-miR-151-3p	Atg5	-1.66	2
		ART3	5.55	1						CYLD	-1.84	1
		ATXN7L1	5.61	1						FADS1	-2.72	1
		B3GNT6	4.37	1					rno-miR-148a-3p	BCL7B	-2.21	1
		BTLA	2.98	1						CFL2	-1.72	1
		CCDC152	5.64	1						CHCHD4	-1.68	1
		DAB1	4.19	1						LOC363337	-2.58	1
		Dmbt1	3.71	2						Marchf2	-1.78	1
		EEF2K	2.49	1						Ppp1cb	-1.97	3
		MARC1	7.12	1						RAB11B	-1.73	1
		NAIF1	4.48	1						SLC16A6	-2.8	1
		NRG1	4.18	1						Slc17a1	-2.62	2
		PDE3A	2.81	1						TFRC	-2.01	1
		PLA2R1	5.56	1					rno-miR-32-5p	CFL2	-1.72	1
		PPM1K	2.94	1						COPS2	-2.01	1
		PRND	3.39	1						Ddc	-2.84	2
		PSKH1	3.2	1						FHL2	-1.82	1
		PSTPIP1	3.52	1						Insig1	-1.81	3
		VSIG4	35.25	1						Nfyc	-1.64	2
		WSCD2	8.6	1						Per2	-2.04	3
		XKR4	3.82	1						Pik3cb	-1.64	3
	rno-miR-466b-3p	ATF7IP2	3.16	1						SLC12A2	-2.48	1
		BTLA	2.98	1						Usf2	-1.7	3
		CNNM4	3.52	1					rno-miR-322-3p	ATP4A	-1.6	1
		DDX60	2.47	1						BZW1	-1.9	1
		HECA	3.06	1						CD83	-1.65	1
		HELZ2	3.81	1						CYLD	-1.84	1
		LONRF1	4.31	1						DNM1L	-1.61	1
		Nrg1	4.18	3						EGLN3	-1.88	1
		NXPH3	2.76	1						FADS1	-2.72	1
		PDE3A	2.81	1						FAM107B	-5.6	1
		Ppm1k	2.94	3						FHL2	-1.82	1
		PROCR	3.67	1						GPC3	-1.75	1
		PSKH1	3.2	1						LMO4	-1.99	1
		RFFL	4.09	1						LYPLA1	-1.75	1
		SHANK3	4.63	1						Mpdz	-3.75	3
		Tmem68	4.35	3						NAMPT	-1.71	1
		XKR4	3.82	1						NBEA	-3.26	1
		ZFP37	3.94	1						SHROOM2	-1.64	1
	rno-miR-466b-2-3p	AKAP5	6.57	1						SMLR1	-2.65	1
		ATRX	2.62	1						SPPL2A	-1.77	1
		COLCA2	4	1						Tfrc	-2.01	3
		CSGALNACT1	4.04	1						TMED1	-2.26	1
		Cyp26a1	2.63	3						UGDH	-1.69	1
		GMCL1	3.28	1						VPS41	-2.23	1
		GPNMB	6.99	1						WDR72	-1.63	1
		HECA	3.06	1						ZBTB41	-1.87	1
		KYNU	4.97	1					rno-miR-18a-5p	Trim2	-1.75	3
		LONRF1	4.31	1					rno-miR-17-1-3p	ASH2L	-1.75	1
		NEU3	4.9	1						ATG5	-1.66	1
		Nrg1	4.18	3						BZW1	-1.9	1
		PDE3A	2.81	1						COPS2	-2.01	1
		PKD1	3.61	1						DPT	-1.9	1
		PPM1K	2.94	1						EGLN3	-1.88	1
		RFFL	4.09	1						ENO1	-1.8	1
		SETDB2	3.06	1						ENSA	-1.84	1
		SHISA3	14.47	1						FAM107B	-5.6	1
		TF	40.93	1						Hdac3	-1.89	3
		Tmem68	4.35	3						HIST2H2BE	-1.74	1
		XKR4	3.82	1						KIFAP3	-1.72	1
		ZBTB16	2.87	1						LMO4	-1.99	1
	rno-miR-188-5p	CORO2A	3.4	1						METRN	-3.31	1
	rno-miR-211-3p	ATF7IP2	3.16	1						MGRN1	-1.91	1
		ATXN7L1	5.61	1						NAMPT	-1.71	1
		CEACAM1	11.35	1						PER2	-2.04	1
		CNNM4	3.52	1						PRKD3	-1.64	1
		CORO2A	3.4	1						SERP1	-1.89	1
		CYP26A1	2.63	1						Shroom2	-1.64	3
		EEF2K	2.49	1						SLC12A8	-1.87	1
		EHD3	4.07	1						SLC17A1	-2.62	1
		LDLRAD1	4.13	1						SLC4A4	-2.04	1
		LMBR1L	3.39	1						SLC6A19	-1.89	1
		LZTS1	4.42	1						SMYD2	-1.81	1
		Neu3	4.9	3						SRP72	-1.88	1
		NRBP2	5.91	1						TFRC	-2.01	1
		NRG1	4.18	1						TMEM181	-1.97	1
		NXPH3	2.76	1						TRIM2	-1.75	1
		PRND	3.39	1						UGDH	-1.69	1
		PSKH1	3.2	1						USF2	-1.7	1
		RASGRP4	3.32	1						VPS41	-2.23	1
		TMEM63C	6.45	1						WDR72	-1.63	1
		WSCD2	8.6	1						Wnt2b	-2.04	3
		XKR4	3.82	1					rno-miR-450a-5p	N/A
	rno-miR-1306-3p	GMCL1	3.28	1					rno-miR-153-3p	Arntl	-2.15	3
		PSTPIP1	3.52	1						ATG5	-1.66	1
		ZFP37	3.94	1						CFL2	-1.72	1
										Kctd6	-1.63	3
										Kif20a	-2.94	2
										Lypla1	-1.75	2
										NBEA	-3.26	1
										RCHY1	-1.6	1
										SLC4A4	-2.04	1
										SLC9A6	-1.8	1
										Slc9a9	-2.15	3
										TMEM181	-1.97	1
									rno-miR-142-5p	Brk1	-1.62	2
										Ect2	-3.49	2
										EGLN3	-1.88	1
										Fam107b	-5.6	3
										MTUS1	-1.84	1
										NBEA	-3.26	1
										Rab11b	-1.73	3
										Ranbp1	-2.18	3
										SLC4A4	-2.04	1
										Srebf1	-1.68	3
								Ti-kidney down	rno-miR-466b-3p	ANLN	1.98	1
										Arid4a	1.87	3
										Atp12a	10.67	3
										CBX2	1.69	1
										CDC73	3.59	1
										CEBPB	2.08	1
										CLDN23	2.68	1
										CREB5	2.69	1
										DGKE	2.83	1
										Dnajc14	1.67	3
										Eif1ad	1.69	2
										FAM43A	2.5	1
										FHDC1	3.12	1
										INHBB	4.32	1
										Klf11	2.08	3
										LIG4	1.91	1
										LINGO4	2.85	1
										LRRC8E	1.93	1
										Macir	9.69	1
										NDRG2	1.62	1
										Ndrg4	1.91	3
										PDZRN3	1.99	1
										PGM2L1	2.17	1
										POU2F1	1.67	1
										PRRC1	1.69	1
										RNF144B	1.65	1
										Sbno2	1.63	3
										SLC5A3	1.75	1
										Snx19	1.6	3
										SORCS1	1.79	1
										SPP1	2.1	1
										TG	2.24	1
										TMTC4	1.74	1
										Trib2	2.07	3
										Wdr44	1.66	3
										ZFX	1.85	1
									rno-miR-494-3p	Cyp26b1	3.34	2
										Defb29	1.81	2
										GATAD2B	2.01	1
										Irs2	2.86	2
										MAT2A	1.69	1
										PKNOX1	1.89	1
										Snx19	1.6	2
										Wdr44	1.66	2
										ZFX	1.85	1
									rno-miR-466b-2-3p	ANLN	1.98	1
										Arid4a	1.87	3
										ATP2B3	2.26	1
										CCDC88A	1.74	1
										CDC73	3.59	1
										CEBPB	2.08	1
										CPT1B	1.84	1
										CREB5	2.69	1
										CYP26B1	3.34	1
										DGKE	2.83	1
										DMTF1	1.66	1
										DOCK3	1.92	1
										Eif1ad	1.69	2
										FAM43A	2.5	1
										Fktn	2.06	3
										FST	3.35	1
										Gabbr2	3.26	3
										Grsf1	1.78	3
										H1F0	2.16	1
										KLF11	2.08	1
										LINGO4	2.85	1
										LRRC8E	1.93	1
										MGAT3	7.13	1
										NDRG2	1.62	1
										Ndrg4	1.91	3
										PGM2L1	2.17	1
										PIGN	1.73	1
										PIM3	1.89	1
										PLEKHA7	1.73	1
										POU2F1	1.67	1
										POU3F1	2.03	1
										REST	1.64	1
										RNF144B	1.65	1
										RNF19A	2.06	1
										Rtn1	2.31	3
										SCIN	2.36	1
										SIK1	2.11	1
										SLC4A11	2.25	1
										SLC5A3	1.75	1
										SLC6A6	2.66	1
										SORCS1	1.79	1
										SPSB1	2.37	1
										TMTC4	1.74	1
										TRIB2	2.07	1
										Wdr44	1.66	3
										ZFX	1.85	1
										ZSCAN2	2.52	1
										ZSWIM5	1.71	1
									rno-miR-188-5p	GATAD2B	2.01	1
										MGAT3	7.13	1
									rno-miR-3075	ANGPTL4	4.23	1
										ART3	1.78	1
										CASC3	4.9	1
										CBX2	1.69	1
										CISH	1.91	1
										DGKE	2.83	1
										DHX35	2.09	1
										DMTF1	1.66	1
										DNAJC14	1.67	1
										DOCK3	1.92	1
										FAM163B	2.08	1
										GABBR2	3.26	1
										HIVEP3	2.15	1
										HNF1B	1.87	1
										LRRC8E	1.93	1
										MAT2A	1.69	1
										MIDN	1.65	1
										PCSK4	1.66	1
										PLEKHA7	1.73	1
										POU2F1	1.67	1
										PRPF40B	1.72	1
										RARB	2.71	1
										RNF144B	1.65	1
										SEMA6D	2.06	1
										SLC39A8	1.82	1
										SLC5A3	1.75	1
										SLC6A6	2.66	1
										SMIM5	5.07	1
										UVRAG	1.69	1
										VPS37D	1.83	1
										ZFX	1.85	1
									rno-miR-1306-3p	CLINT1	1.67	1
										EXTL1	1.78	1
										RAP1GAP	1.64	1
										RCHY1	1.6	1
										TG	1.81	1
									rno-miR-92b-5p	ARHGAP32	1.93	1
										CEBPB	2.08	1
										DIRAS1	1.8	1
										ETNK2	1.81	1
										FST	3.35	1
										GATAD2B	2.01	1
										HIVEP3	2.15	1
										MAP3K6	1.84	1
										NDRG4	1.91	1
										NRGN	2.63	1
										PIGN	1.73	1
										REEP6	1.89	1
										SLC6A6	2.66	1
										SPSB1	2.37	1
									rno-miR-138-1-3p	ASB2	1.84	1
										CASC3	4.9	1
										CISH	1.91	1
										CREB5	2.69	1
										DMTF1	1.66	1
										ELF5	2.22	1
										ETNK2	1.81	1
										FAM43A	2.5	1
										GATAD2B	2.01	1
										GRSF1	1.78	1
										H1F0	2.16	1
										INHBB	4.32	1
										KLF11	2.08	1
										NDRG4	1.91	1
										NRGN	2.63	1
										POU2F1	1.67	1
										PPARGC1B	1.83	1
										PRPF40B	1.72	1
										SEMA6D	2.06	1
										SIK1	2.11	1
										SLC6A6	2.66	1
										SNX19	1.6	1
										ZFX	1.85	1
									rno-miR-325-5p	ADAMTS15	1.76	1
										APCDD1	1.62	1
										ASB2	1.84	1
										GRSF1	1.78	1
										MIDN	1.65	1
										PDGFA	1.61	1
										POU2F1	1.67	1
										PPARGC1B	1.83	1
										RHBDL3	9.51	1
										SLC5A3	1.75	1
										WDR44	1.66	1
									rno-miR-211-3p	ARHGAP32	1.68	1
										ATG5	1.66	1
										BZW1	1.66	1
										CBX7	1.73	1
										Ccl21	1.98	3
										CFL2	1.72	1
										COPS2	1.72	1
										CREB5	1.9	1
										CYB5R1	1.83	1
										DGKE	1.92	1
										DNAJC14	1.67	1
										DPT	1.66	1
										Erbb2	1.67	3
										EXTL1	1.78	1
										GATAD2B	1.72	1
										GNS	1.79	1
										HIVEP3	1.77	1
										HPS1	1.8	1
										IHH	1.73	1
										INSIG1	1.81	1
										KLHDC8A	1.8	1
										LINGO4	1.93	1
										PHF19	1.6	1
										PIK3CB	1.64	1
										PPARGC1B	1.83	1
										PRPF40B	1.72	1
										RAB11B	1.73	1
										RARB	1.91	1
										RNF144B	1.65	1
										RNF183	1.84	1
										SEC14L2	1.73	1
										SERP1	1.66	1
										SLC9A6	1.8	1
										SNX19	1.6	1
										SORCS1	1.79	1
										TG	1.81	1
										TMEM181	1.69	1
										TMEM70	1.63	1
										TRIM2	1.75	1
										TUBA1C	1.61	1
										ULK3	1.94	1
										UVRAG	1.69	1
										VPS37D	1.83	1
										VPS41	1.8	1
										Wnt2b	1.72	3
										ZFP3	1.68	1
