# Supplementary material for: Gold and titania nanoparticles accumulated in the body induce late toxic effects and alterations in transcriptional and miRNA landscape
Source: Royal Society of Chemistry journal article supplement (doi:10.1039/d3en00954h), 2024-01-01
Supplement: d3en00954h6.pdf [file d3en00954h6.pdf]

**Table S2A** Biochemical parameters of blood in rats 28 days after single *iv* application of PBS and TMAOH

| Parameter | Unit   | Group I (PBS)<br>(n = 3) | Group II (TMAOH)<br>(n = 4) |
|-----------|--------|--------------------------|-----------------------------|
| ALT       | μkat/L | 1.05 ± 0.08              | 0.99 ± 0.12                 |
| AST       | μkat/L | 1.76 ± 0.39              | 1.58 ± 0.11                 |
| UREA      | mmol/L | 6.30 ± 0.44              | 7.86 ± 1.03                 |
| ALB       | g/L    | 33.50 ± 0.70             | 32.85 ± 0.63                |
| TP        | g/L    | 58.50 ± 1.95             | 58.25 ± 1.68                |
| CHOL      | mmol/L | 1.43 ± 0.12              | 1.39 ± 0.13                 |
| TAG       | mmol/L | 0.95 ± 0.27              | 0.83 ± 0.21                 |
| CREAT     | μmol/L | 23.83 ± 3.21             | 22.33 ± 1.70                |
| Ca        | mmol/L | 2.67 ± 0.17              | 2.42 ± 0.04                 |
| Mg        | mmol/L | 0.91 ± 0.33              | 0.95 ± 0.02                 |
| P         | mmol/L | 3.03 ± 0.42              | 2.60 ± 0.38                 |

**Abbreviations:** ALT – alanine aminotransferase, AST – aspartate aminotransferase, UREA – urea, ALB – albumin, TP – total proteins, CHOL – cholesterol, TAG – triglycerides, CREAT – creatinine, Ca – calcium, Mg – magnesium, P – phosphorus. Results are expressed as mean ± SEM. Significance: \**p* < 0.05; \*\**p* < 0.01.

**Table S2B** Hematological parameters in rats 28 days after single *iv* application of PEG-AuNPs and TiO<sub>2</sub>NPs

| Parameter | Unit                | Group I (PBS)<br>(n = 3) | Group II (TMAOH)<br>(n = 4) |
|-----------|---------------------|--------------------------|-----------------------------|
| WBC       | 10 <sup>9</sup> /L  | 6.20 ± 0.25              | 5.80 ± 0.63                 |
| RBC       | 10 <sup>12</sup> /L | 7.45 ± 0.28              | 8.23 ± 0.34                 |
| HGB       | g/dL                | 14.47 ± 0.78             | 15.80 ± 0.31                |
| HCT       | %                   | 43.80 ± 0.78             | 47.75 ± 1.73                |
| MCV       | fL                  | 58.77 ± 0.23             | 58.05 ± 0.34                |
| MCH       | pg                  | 19.37 ± 0.35             | 19.23 ± 0.47                |
| MCHC      | g/dL                | 32.97 ± 0.55             | 33.15 ± 0.62                |
| PLT       | 10 <sup>9</sup> /L  | 690.33 ± 42.12           | 753.75 ± 78.67              |
| LYM %     | %                   | 85.80 ± 0.64             | 85.80 ± 1.95                |
| LYM       | 10 <sup>3</sup> /μL | 5.33 ± 0.17              | 4.93 ± 0.49                 |

**Abbreviations:** WBC - White blood cells; RBC - Red blood cells; HGB – Haemoglobin; HCT – Haematocrit; MCV - Mean Cell Volume; MCH - Mean Cell Haemoglobin; MCHC - Mean Cell Haemoglobin Concentration; PLT – Platelets; LYM – Lymphocytes. Results are expressed as mean ± SEM. Significance: \**p* < 0.05.

**Table S2C** Cytokine and chemokine levels in spleen cell culture supernatants determined 28 days after single *iv* MNPs administration

| Cytokine/<br>chemokine | Unit  | Group I (PBS)<br>(n = 3) | Group II (TMAOH)<br>(n = 4) |
|------------------------|-------|--------------------------|-----------------------------|
| IL-1 $\alpha$          | pg/mL | 679.14 $\pm$ 68.81       | 572.37 $\pm$ 57.12          |
| IL-1 $\beta$           | pg/mL | 68.70 $\pm$ 4.57         | 60.35 $\pm$ 7.05            |
| IL-2                   | ng/mL | 13.33 $\pm$ 0.53         | 12.63 $\pm$ 0.37            |
| IL-4                   | pg/mL | 44.84 $\pm$ 0.88         | 41.75 $\pm$ 14.28           |
| IL-5                   | pg/mL | 54.00 $\pm$ 4.40         | 42.13 $\pm$ 6.32            |
| IL-6                   | pg/mL | 19.67 $\pm$ 3.40         | 15.62 $\pm$ 0.23            |
| IL-10                  | ng/mL | 6.39 $\pm$ 0.17          | 5.30 $\pm$ 0.78             |
| IL-12p/70              | pg/mL | 378.74 $\pm$ 61.02       | 327.22 $\pm$ 36.56          |
| IL-13                  | pg/mL | 27.62 $\pm$ 1.69         | 42.13 $\pm$ 13.20           |
| IL-17A                 | pg/mL | 621.49 $\pm$ 99.46       | 308.66 $\pm$ 44.93          |
| IFN- $\gamma$          | ng/mL | 48.07 $\pm$ 9.26         | 42.86 $\pm$ 13.17           |
| GM-CSF                 | pg/mL | 66.25 $\pm$ 9.94         | 64.76 $\pm$ 12.76           |
| TNF- $\alpha$          | pg/mL | 159.29 $\pm$ 38.94       | 152.01 $\pm$ 32.26          |
| MIP-2                  | pg/mL | 185.53 $\pm$ 49.78       | 126.23 $\pm$ 22.75          |
| MCP-1                  | ng/mL | 55.25 $\pm$ 4.92         | 48.93 $\pm$ 6.33            |
| MCP-3                  | ng/mL | 2.41 $\pm$ 0.35          | 2.31 $\pm$ 0.31             |
| IP-10                  | ng/mL | 11.47 $\pm$ 0.53         | 13.62 $\pm$ 1.35            |
| Eotaxin                | pg/mL | 23.21 $\pm$ 2.35         | 21.63 $\pm$ 2.33            |
| CXCL1                  | pg/mL | 271.28 $\pm$ 12.80       | 229.57 $\pm$ 11.58          |
| Rantes                 | ng/mL | 34.39 $\pm$ 5.52         | 27.95 $\pm$ 1.72            |

**Abbreviations:** IL – interleukin, IFN $\gamma$  – interferon-gamma, G-CSF - Granulocyte-colony stimulating factor, GM-CSF - Granulocyte-macrophage colony-stimulating factor, TNF- $\alpha$  - tumor necrosis factor-alpha, MIP-2 - macrophage inflammatory protein 2, MCP-1 - monocyte chemoattractant protein 1, MCP-3 - monocyte-chemotactic protein 3, IP-10 - Interferon gamma-induced protein 10, eotaxin - eosinophil chemotactic protein, CXCL1 - chemokine (C-X-C motif) ligand 1, Rantes - regulated on activation, normal T cell expressed and secreted, nd – not detected, ac - above calibration curve
