# Supplementary material for: Gold and titania nanoparticles accumulated in the body induce late toxic effects and alterations in transcriptional and miRNA landscape
Source: Royal Society of Chemistry journal article supplement (doi:10.1039/d3en00954h), 2024-01-01
Supplement: d3en00954h7.pdf [file d3en00954h7.pdf]

**Table S3** Biochemical parameters of blood in rats 28 days after single *iv* application of PEG-AuNPs and TiO<sub>2</sub>NPs

| Parameter | Unit   | Control (n = 7) | PEG-AuNPs (n = 8)         | TiO <sub>2</sub> NPs (n = 8) |
|-----------|--------|-----------------|---------------------------|------------------------------|
| ALT       | μkat/L | 1.01 ± 0.07     | 0.79 ± 0.03 <sup>+</sup>  | 0.85 ± 0.05                  |
| AST       | μkat/L | 1.66 ± 0.16     | 2.29 ± 0.12 <sup>**</sup> | 1.62 ± 0.09                  |
| UREA      | mmol/L | 7.19 ± 0.66     | 7.40 ± 0.43               | 7.76 ± 0.34                  |
| ALB       | g/L    | 33.13 ± 0.45    | 35.66 ± 0.85 <sup>*</sup> | 35.48 ± 0.46 <sup>**</sup>   |
| TP        | g/L    | 58.36 ± 1.16    | 66.74 ± 1.05              | 65.65 ± 1.65 <sup>**</sup>   |
| CHOL      | mmol/L | 1.41 ± 0.09     | 2.08 ± 0.18 <sup>*</sup>  | 2.00 ± 0.17 <sup>*</sup>     |
| TAG       | mmol/L | 0.88 ± 0.15     | 0.52 ± 0.11 <sup>+</sup>  | 0.66 ± 0.08                  |
| CREAT     | μmol/L | 30.09 ± 7.12    | 27.44 ± 1.21              | 26.34 ± 1.68                 |
| Ca        | mmol/L | 2.52 ± 0.08     | 2.44 ± 0.02               | 2.47 ± 0.02                  |
| Mg        | mmol/L | 1.07 ± 0.14     | 1.06 ± 0.02               | 0.96 ± 0.02                  |
| P         | mmol/L | 2.78 ± 0.27     | 3.62 ± 0.11               | 3.54 ± 0.16 <sup>*</sup>     |

**Abbreviations:** ALT – alanine aminotransferase, AST – aspartate aminotransferase, UREA – urea, ALB – albumin, TP – total proteins, CHOL – cholesterol, TAG – triglycerides, CREAT – creatinine, Ca – calcium, Mg – magnesium, P – phosphorus. Results are expressed as mean ± SEM. Significance: \**p* < 0.05; \*\**p* < 0.01.
