# Supplementary material for: Gold and titania nanoparticles accumulated in the body induce late toxic effects and alterations in transcriptional and miRNA landscape
Source: Royal Society of Chemistry journal article supplement (doi:10.1039/d3en00954h), 2024-01-01
Supplement: d3en00954h8.pdf [file d3en00954h8.pdf]

**Table S4** Hematological parameters in rats 28 days after single *iv* application of PEG-AuNPs and TiO<sub>2</sub>NPs

| Parameter                     | Unit                | Control (n = 7) | PEG-AuNPs (n = 8)    | TiO <sub>2</sub> NPs (n = 8) |
|-------------------------------|---------------------|-----------------|----------------------|------------------------------|
| WBC                           | 10 <sup>9</sup> /L  | 5.97 ± 0.36     | 6.61 ± 0.63          | 7.48 ± 0.65                  |
| RBC                           | 10 <sup>12</sup> /L | 7.90 ± 0.26     | <b>8.75 ± 0.25*</b>  | <b>8.89 ± 0.30*</b>          |
| HGB                           | g/dL                | 15.23 ± 0.43    | <b>17.28 ± 0.38*</b> | <b>17.21 ± 0.60*</b>         |
| HCT                           | %                   | 46.06 ± 1.38    | 50.93 ± 1.29         | <b>51.63 ± 1.85*</b>         |
| MCV                           | fL                  | 58.36 ± 0.25    | 58.22 ± 0.45         | 58.09 ± 0.70                 |
| MCH                           | pg                  | 19.29 ± 0.29    | 19.77 ± 0.25         | 19.38 ± 0.29                 |
| MCHC                          | g/dL                | 33.07 ± 0.39    | 33.96 ± 0.28         | 33.34 ± 0.18                 |
| PLT                           | 10 <sup>9</sup> /L  | 726.6 ± 46.8    | 803.9 ± 39.9         | <b>866.4 ± 34.8*</b>         |
| LYM %                         | %                   | 85.80 ± 1.07    | 82.72 ± 1.15         | 80.16 ± 1.68                 |
| LYM                           | 10 <sup>3</sup> /μL | 5.10 ± 0.28     | 5.44 ± 0.48          | 5.99 ± 0.54                  |
| <b>Differential WBC count</b> |                     |                 |                      |                              |
| Lymphocytes                   | %                   | 86.79 ± 1.88    | 82.72 ± 1.63         | 83.125 ± 1.89                |
| Neutrophils                   | %                   | 12.00 ± 1.49    | 15.22 ± 1.50         | 14.94 ± 1.79                 |
| Monocytes                     | %                   | 0.29 ± 0.10     | <b>1.00 ± 0.25*</b>  | <b>1.19 ± 0.21*</b>          |
| Eosinophils                   | %                   | 0.93 ± 0.53     | 1.06 ± 0.21          | 0.75 ± 0.27                  |
| Basophils                     | %                   | 0.0 ± 0.0       | 0.0 ± 0.0            | 0.0 ± 0.0                    |

**Abbreviations:** WBC - White blood cells; RBC - Red blood cells; HGB – Haemoglobin; HCT – Haematocrit; MCV - Mean Cell Volume; MCH - Mean Cell Haemoglobin; MCHC - Mean Cell Haemoglobin Concentration; PLT – Platelets; LYM – Lymphocytes. Results are expressed as mean ± SEM. Significance: \*p < 0.05.
