# Supplementary material for: Gold and titania nanoparticles accumulated in the body induce late toxic effects and alterations in transcriptional and miRNA landscape
Source: Royal Society of Chemistry journal article supplement (doi:10.1039/d3en00954h), 2024-01-01
Supplement: d3en00954h9.pdf [file d3en00954h9.pdf]

**Table S5** Phenotypic analysis of spleen, thymus, and lymph node cells at 28 days after *iv* application of AuPEG and TiO<sub>2</sub>NPs

| Organ       | Marker [%]                          | Control (n=7) | PEG-AuNPs (n=8)       | TiO <sub>2</sub> NPs (n=8) |
|-------------|-------------------------------------|---------------|-----------------------|----------------------------|
| Spleen      | CD3 <sup>+</sup>                    | 35.45 ± 0.53  | 39.54 ± 2.10          | 39.61 ± 2.05               |
|             | CD3 <sup>+</sup> CD4 <sup>+</sup>   | 24.35 ± 0.80  | 25.33 ± 1.26          | 25.42 ± 1.21               |
|             | CD3 <sup>+</sup> CD8 <sup>+</sup>   | 11.44 ± 1.03  | 13.05 ± 1.06          | 13.83 ± 0.98               |
|             | CD3 <sup>+</sup> CD45R <sup>+</sup> | 24.99 ± 1.75  | <b>37.88 ± 3.52 *</b> | 28.64 ± 0.94               |
|             | CD3 <sup>+</sup> CD161 <sup>+</sup> | 4.66 ± 0.42   | 4.97 ± 0.43           | 4.30 ± 0.23                |
| Thymus      | CD3 <sup>+</sup>                    | 17.50 ± 1.66  | 16.28 ± 0.98          | 15.11 ± 1.27               |
|             | CD3 <sup>+</sup> CD4 <sup>+</sup>   | 15.19 ± 1.41  | 13.89 ± 0.95          | 12.45 ± 0.97               |
|             | CD3 <sup>+</sup> CD8 <sup>+</sup>   | 5.76 ± 0.55   | 6.88 ± 0.81           | <b>4.18 ± 0.51 *</b>       |
| Lymph nodes | CD3 <sup>+</sup>                    | 58.56 ± 4.93  | 56.50 ± 2.94          | 59.05 ± 2.38               |
|             | CD3 <sup>+</sup> CD4 <sup>+</sup>   | 41.49 ± 3.15  | 43.36 ± 1.88          | 45.69 ± 1.90               |
|             | CD3 <sup>+</sup> CD8 <sup>+</sup>   | 16.50 ± 2.67  | 13.62 ± 1.29          | 13.66 ± 0.85               |
|             | CD3 <sup>+</sup> CD45R <sup>+</sup> | 16.69 ± 1.23  | 20.84 ± 1.85          | 19.96 ± 1.87               |

**Abbreviations:** CD3<sup>+</sup> - T-lymphocytes; CD3<sup>+</sup>CD4<sup>+</sup> - T-helper lymphocytes; CD3<sup>+</sup>CD8<sup>+</sup> - T-cytotoxic lymphocytes; CD3<sup>+</sup>CD45R<sup>+</sup> - B-lymphocytes; CD3<sup>+</sup>CD161<sup>+</sup> - NK cells. Results are expressed as mean ± SEM. Significance: \*p < 0.05
