# Supplementary material for: Gold and titania nanoparticles accumulated in the body induce late toxic effects and alterations in transcriptional and miRNA landscape
Source: Royal Society of Chemistry journal article supplement (doi:10.1039/d3en00954h), 2024-01-01
Supplement: d3en00954h10.xlsx [file d3en00954h10.xlsx]

## Sheet: AuNPs Lung
ProbeName	p value	Regulation	FC (abs)	FC	Log FC	GeneSymbol	Description
A_64_P133997	0.009282466	up	6.795725	6.795725	2.7646275	Gpr35	Rattus norvegicus G protein-coupled receptor 35 (Gpr35), mRNA [NM_001037359]
A_44_P1117889	0.009175232	down	6.1454167	-6.1454167	-2.619511	LOC103691118	PREDICTED: Rattus norvegicus uncharacterized LOC103691118 (LOC103691118), ncRNA [XR_590189]
A_44_P1153189	0.0036774871	up	5.7524095	5.7524095	2.5241663	LOC683422	similar to Plasma kallikrein precursor (Plasma prekallikrein) (Kininogenin) (Fletcher factor) [Source:RGD Symbol;Acc:1586868] [ENSRNOT00000072438]
A_44_P1085641	0.045016993	down	5.466795	-5.466795	-2.4506953	Cox6a2	Rattus norvegicus cytochrome c oxidase subunit 6A2 (Cox6a2), transcript variant 1, mRNA [NM_012812]
A_44_P1084096	0.0039692544	up	5.0610285	5.0610285	2.3394306	Acot1	Rattus norvegicus acyl-CoA thioesterase 1 (Acot1), mRNA [NM_031315]
A_64_P085530	0.0020795015	down	4.445651	-4.445651	-2.1523948	Scd	Rattus norvegicus stearoyl-CoA desaturase (Scd), mRNA [NM_139192]
A_44_P1102793	0.0022620256	up	4.4093018	4.4093018	2.1405501	Dchs2	PREDICTED: Rattus norvegicus dachsous cadherin-related 2 (Dchs2), transcript variant X1, mRNA [XM_017591290]
A_44_P1119134	0.004901113	up	4.1121535	4.1121535	2.039894
A_64_P088382	0.04477149	up	4.1107173	4.1107173	2.03939	Angptl4	Rattus norvegicus angiopoietin-like 4 (Angptl4), mRNA [NM_199115]
A_42_P736573	0.017959908	up	4.0310106	4.0310106	2.0111415	Pdk4	UI-R-C0-jp-f-11-0-UI.s1 UI-R-C0 Rattus norvegicus cDNA clone UI-R-C0-jp-f-11-0-UI 3', mRNA sequence [AI031053]
A_44_P1156522	0.00578124	up	3.8215833	3.8215833	1.9341705		tetratricopeptide repeat domain 24 [Source:RGD Symbol;Acc:2319887] [ENSRNOT00000050476]
A_44_P1104863	0.009554109	up	3.7435138	3.7435138	1.9043931	Mad2l1	PREDICTED: Rattus norvegicus MAD2 mitotic arrest deficient-like 1 (yeast) (Mad2l1), transcript variant X3, mRNA [XM_006236621]
A_44_P824731	0.020307457	up	3.605517	3.605517	1.8502061	Sgo1	shugoshin 1 [Source:RGD Symbol;Acc:1593238] [ENSRNOT00000065721]
A_44_P387299	0.040189877	up	3.3847003	3.3847003	1.7590281	LOC103690500	PREDICTED: Rattus norvegicus uncharacterized LOC103690500 (LOC103690500), ncRNA [XR_001839745]
A_44_P1107893	0.017588565	up	3.3679523	3.3679523	1.7518717	RGD1566029	PREDICTED: Rattus norvegicus similar to mKIAA1644 protein (RGD1566029), transcript variant X7, mRNA [XM_017595276]
A_44_P1119826	0.015438358	up	3.3455234	3.3455234	1.7422318
A_44_P1092451	0.022131698	up	3.3352752	3.3352752	1.7378057
A_44_P1144175	0.02631027	up	3.2550406	3.2550406	1.7026756	LOC103691900	PREDICTED: Rattus norvegicus uncharacterized LOC103691900 (LOC103691900), ncRNA [XR_591698]
A_64_P035291	0.040950626	down	3.2319198	-3.2319198	-1.6923914	Gsta3	Rattus norvegicus glutathione S-transferase alpha 3 (Gsta3), transcript variant 1, mRNA [NM_001009920]
A_64_P076232	0.01354215	up	3.2243164	3.2243164	1.6889933	Ido2	PREDICTED: Rattus norvegicus indoleamine 2,3-dioxygenase 2 (Ido2), transcript variant X2, mRNA [XM_003752920]
A_64_P047470	0.023307323	up	3.223641	3.223641	1.688691	Spink14	Rattus norvegicus serine peptidase inhibitor, Kazal type 14 (Spink14), mRNA [NM_001008875]
A_44_P1142654	0.021498341	up	3.1810849	3.1810849	1.6695188		Q5DBE9_SCHJA (Q5DBE9) SJCHGC01974 protein, partial (13%) [TC635577]
A_64_P155099	0.0056576105	up	3.1560535	3.1560535	1.6581217	Tmem241	transmembrane protein 241 [Source:RGD Symbol;Acc:1590602] [ENSRNOT00000029274]
A_44_P1100011	0.038119525	up	3.148504	3.148504	1.6546665	RGD1561226	Rattus norvegicus similar to DNA segment, Chr 5, ERATO Doi 577, expressed (RGD1561226), mRNA [NM_001109329]
A_44_P391517	0.014562251	up	3.1410868	3.1410868	1.6512638	Nkx3-1	Rattus norvegicus NK3 homeobox 1 (Nkx3-1), mRNA [NM_001034144]
A_44_P1151259	0.010701013	up	3.1188164	3.1188164	1.6409986	LOC103690083	PREDICTED: Rattus norvegicus uncharacterized LOC103690083 (LOC103690083), transcript variant X33, ncRNA [XR_001842804]
A_44_P274256	0.024294974	down	3.093209	-3.093209	-1.6291043	Vom2r73	Rattus norvegicus vomeronasal 2 receptor, 73 (Vom2r73), mRNA [NM_001099486]
A_64_P005391	0.011065525	up	3.0512073	3.0512073	1.6093801	Drgx	Rattus norvegicus dorsal root ganglia homeobox (Drgx), mRNA [NM_145767]
A_44_P1367170	0.010848869	down	3.0489967	-3.0489967	-1.6083345
A_42_P529842	0.042818245	up	3.0024357	3.0024357	1.5861334	Trim17	Rattus norvegicus tripartite motif-containing 17 (Trim17), mRNA [NM_022798]
A_44_P1107868	0.033578806	up	2.9774892	2.9774892	1.5740963	Xpnpep3	X-prolyl aminopeptidase 3 [Source:RGD Symbol;Acc:1589063] [ENSRNOT00000068666]
A_44_P574530	0.0063505727	down	2.9768941	-2.9768941	-1.573808		EST349237 Rat gene index, normalized rat, norvegicus, Bento Soares Rattus norvegicus cDNA clone RGIEK32 5' end, mRNA sequence [AW917933]
A_44_P1154532	0.041466143	up	2.9569004	2.9569004	1.5640856	LOC108353138	PREDICTED: Rattus norvegicus sperm motility kinase X-like (LOC108353138), mRNA [XM_017600744]
A_44_P1097023	0.035918884	up	2.940292	2.940292	1.5559593	LOC685667	PREDICTED: Rattus norvegicus similar to PRAME family member DJ1198H6.2 (LOC685667), transcript variant X2, mRNA [XM_017604869]
A_44_P1099483	0.020861752	down	2.9247322	-2.9247322	-1.5483046	Lilrb4	PREDICTED: Rattus norvegicus leukocyte immunoglobulin like receptor B4 (Lilrb4), transcript variant X5, mRNA [XM_006227242]
A_44_P1142000	0.014857249	up	2.921128	2.921128	1.5465256	LOC102552087	PREDICTED: Rattus norvegicus uncharacterized LOC102552087 (LOC102552087), transcript variant X1, ncRNA [XR_350039]
A_44_P1104000	0.032145113	up	2.8940377	2.8940377	1.5330837	Slc20a1	PREDICTED: Rattus norvegicus solute carrier family 20 member 1 (Slc20a1), transcript variant X2, mRNA [XM_006234992]
A_64_P159300	0.012930134	up	2.8245013	2.8245013	1.4979961	Adam7	Rattus norvegicus ADAM metallopeptidase domain 7 (Adam7), mRNA [NM_020301]
A_44_P1118729	0.010910518	up	2.791904	2.791904	1.4812493
A_44_P1130847	0.037967257	up	2.754778	2.754778	1.461936	LOC103690569	PREDICTED: Rattus norvegicus uncharacterized LOC103690569 (LOC103690569), ncRNA [XR_589314]
A_64_P057824	0.007227671	down	2.7092507	-2.7092507	-1.4378939	Vom2r72	Rattus norvegicus vomeronasal 2 receptor, 72 (Vom2r72), mRNA [NM_001099517]
A_44_P1154746	0.019317718	up	2.705825	2.705825	1.4360685	Trappc13	Q71JP5_SPAAU (Q71JP5) Mx protein, partial (3%) [TC603880]
A_44_P1096215	0.014986304	up	2.6954153	2.6954153	1.4305075	Krtap22-2	PREDICTED: Rattus norvegicus keratin associated protein 22-2 (Krtap22-2), mRNA [XM_006221081]
A_44_P1080680	0.032437623	up	2.6869285	2.6869285	1.4259579	RGD1561226	Rattus norvegicus similar to DNA segment, Chr 5, ERATO Doi 577, expressed (RGD1561226), mRNA [NM_001109329]
A_42_P468231	0.009349192	up	2.6821334	2.6821334	1.423381	Cpne9	Rattus norvegicus copine family member 9 (Cpne9), mRNA [NM_001024982]
A_44_P1136696	0.0077049257	up	2.6530554	2.6530554	1.4076548
A_44_P1128760	0.018932031	up	2.6524947	2.6524947	1.4073498	LOC102546578	PREDICTED: Rattus norvegicus uncharacterized LOC102546578 (LOC102546578), transcript variant X2, ncRNA [XR_001844485]
A_44_P1102408	0.008402247	up	2.6464417	2.6464417	1.4040538		cellular tumor antigen p53-like [Source:RGD Symbol;Acc:6495488] [ENSRNOT00000072449]
A_44_P1080141	0.021819253	down	2.6301055	-2.6301055	-1.3951206	Vom2r4	Rattus norvegicus vomeronasal 2 receptor, 4 (Vom2r4), mRNA [NM_001099458]
A_64_P091935	0.014526465	down	2.628954	-2.628954	-1.3944888	Scd4	stearoyl-coenzyme A desaturase 4 [Source:RGD Symbol;Acc:1563648] [ENSRNOT00000017834]
A_64_P083159	0.033474196	up	2.6131206	2.6131206	1.3857737	Kctd7	Rattus norvegicus potassium channel tetramerization domain containing 7 (Kctd7), mRNA [NM_001128194]
A_64_P153911	0.0132517675	up	2.6119998	2.6119998	1.3851547	Synpo2l	Rattus norvegicus synaptopodin 2-like (Synpo2l), transcript variant 1, mRNA [NM_001305138]
A_44_P1126792	0.012213703	up	2.6103203	2.6103203	1.3842268	LOC103695297	PREDICTED: Rattus norvegicus uncharacterized LOC103695297 (LOC103695297), ncRNA [XR_601442]
A_44_P1096509	0.018415295	up	2.5952282	2.5952282	1.3758614	Zfp853	PREDICTED: Rattus norvegicus zinc finger protein 853 (Zfp853), transcript variant X1, mRNA [XM_006248904]
A_44_P1159954	0.014415115	up	2.5753458	2.5753458	1.3647661	Arhgef39	Rattus norvegicus Rho guanine nucleotide exchange factor 39 (Arhgef39), mRNA [NM_001106676]
A_44_P1090787	0.03518863	up	2.5705936	2.5705936	1.3621016
A_44_P1139365	0.014398394	down	2.5677192	-2.5677192	-1.3604875	LOC102549287	PREDICTED: Rattus norvegicus uncharacterized LOC102549287 (LOC102549287), ncRNA [XR_597155]
A_44_P1144086	0.020210588	up	2.5559888	2.5559888	1.3538815
A_44_P1148667	0.041273404	up	2.5556269	2.5556269	1.3536772	LOC102554073	PREDICTED: Rattus norvegicus uncharacterized LOC102554073 (LOC102554073), ncRNA [XR_359049]
A_64_P001956	0.012530893	up	2.5425088	2.5425088	1.3462528
A_44_P1126282	0.046291184	up	2.532343	2.532343	1.3404728	LOC102552412	PREDICTED: Rattus norvegicus uncharacterized LOC102552412 (LOC102552412), transcript variant X1, ncRNA [XR_354502]
A_44_P1133490	0.012899794	up	2.5290241	2.5290241	1.3385807		AI102849 EST212138 Normalized rat embryo, Bento Soares Rattus sp. cDNA clone REMBT64 3' end, mRNA sequence [AI102849]
A_44_P1080175	0.022597898	down	2.5025246	-2.5025246	-1.3233843	Vom2r6	Rattus norvegicus vomeronasal 2 receptor, 6 (Vom2r6), mRNA [NM_001099459]
A_44_P135401	0.01669774	up	2.4856966	2.4856966	1.3136501	LOC292543	Rattus norvegicus similar to solute carrier family 7 (cationic amino acid transporter, y+ system), member 3 (LOC292543), mRNA [NM_001025639]
A_44_P1100479	0.022053193	up	2.481663	2.481663	1.3113072	LOC501391	PREDICTED: Rattus norvegicus hypothetical LOC501391 (LOC501391), transcript variant X1, mRNA [XM_008758800]
A_43_P19721	0.02173458	down	2.4804497	-2.4804497	-1.3106017	Vom2r3	PREDICTED: Rattus norvegicus vomeronasal type-2 receptor 26-like (LOC682646), misc_RNA [XR_145832]
A_44_P1039128	0.049642503	up	2.4796226	2.4796226	1.3101206	Cxcl10	Rattus norvegicus C-X-C motif chemokine ligand 10 (Cxcl10), mRNA [NM_139089]
A_42_P466706	0.025251823	down	2.4782162	-2.4782162	-1.309302	PCOLCE2	Rattus norvegicus procollagen C-endopeptidase enhancer 2 (PCOLCE2), mRNA [NM_001127640]
A_64_P029312	0.02953005	up	2.4727557	2.4727557	1.3061197	Prnd	Rattus norvegicus prion protein 2 (dublet) (Prnd), mRNA [NM_001102431]
A_44_P1155682	0.020909304	up	2.4549112	2.4549112	1.2956709	Ptch2	Rattus norvegicus patched 2 (Ptch2), mRNA [NM_001108975]
A_44_P358444	0.010131597	up	2.4275093	2.4275093	1.2794768	Wnt2	wingless-type MMTV integration site family member 2 [Source:RGD Symbol;Acc:621346] [ENSRNOT00000083039]
A_43_P19286	0.0145856235	up	2.4163375	2.4163375	1.2728219	RGD1307595	Rattus norvegicus similar to RIKEN cDNA 1700018B24 (RGD1307595), mRNA [NM_001134511]
A_44_P654933	0.010558298	up	2.4125564	2.4125564	1.2705626	Piwil2	Rattus norvegicus piwi-like RNA-mediated gene silencing 2 (Piwil2), mRNA [NM_001107276]
A_44_P1100169	0.033055924	up	2.4078376	2.4078376	1.2677381	Lats1	PREDICTED: Rattus norvegicus large tumor suppressor kinase 1 (Lats1), transcript variant X1, mRNA [XM_008758607]
A_44_P385076	0.022613961	up	2.4039512	2.4039512	1.2654076		UI-R-E0-de-f-04-0-UI.s2 UI-R-E0 Rattus norvegicus cDNA clone UI-R-E0-de-f-04-0-UI 3', mRNA sequence [AA900253]
A_44_P1141789	0.026144115	up	2.4033937	2.4033937	1.2650731
A_64_P154811	0.010410204	down	2.387312	-2.387312	-1.2553871	Ccdc146	Rattus norvegicus coiled-coil domain containing 146 (Ccdc146), mRNA [NM_001025044]
A_44_P1144540	0.0398403	up	2.3867435	2.3867435	1.2550435	LOC108350670	PREDICTED: Rattus norvegicus uncharacterized LOC108350670 (LOC108350670), ncRNA [XR_001837527]
A_44_P1143915	0.015083115	up	2.3800747	2.3800747	1.2510068	LOC103691768	PREDICTED: Rattus norvegicus uncharacterized LOC103691768 (LOC103691768), transcript variant X1, ncRNA [XR_591464]
A_44_P1102228	0.016859464	up	2.372758	2.372758	1.2465649	Nln	PREDICTED: Rattus norvegicus neurolysin (Nln), transcript variant X1, mRNA [XM_006231880]
A_44_P642231	0.01865253	up	2.3726633	2.3726633	1.2465073		UI-R-E0-cz-f-04-0-UI.s1 UI-R-E0 Rattus norvegicus cDNA clone UI-R-E0-cz-f-04-0-UI 3', mRNA sequence [AI385231]
A_44_P1138396	0.024902157	up	2.3721025	2.3721025	1.2461663
A_44_P1364088	0.045911115	up	2.3690505	2.3690505	1.244309	Rab11fip5	RAB11 family interacting protein 5 [Source:RGD Symbol;Acc:1592069] [ENSRNOT00000086720]
A_44_P1365541	0.030431585	up	2.354419	2.354419	1.2353711
A_44_P1131779	0.037028387	up	2.3388107	2.3388107	1.2257751
A_44_P1111501	0.03735929	up	2.3306384	2.3306384	1.2207252	LOC100362819	PREDICTED: Rattus norvegicus autism susceptibility candidate 2-like (LOC100362819), transcript variant X1, mRNA [XM_008769171]
A_44_P1137800	0.032748826	up	2.3284154	2.3284154	1.2193484	LOC102549787	PREDICTED: Rattus norvegicus uncharacterized LOC102549787 (LOC102549787), transcript variant X3, ncRNA [XR_596662]
A_44_P823844	0.013435591	up	2.322401	2.322401	1.2156171	Arhgef37	Rho guanine nucleotide exchange factor 37 [Source:RGD Symbol;Acc:1560471] [ENSRNOT00000087188]
A_44_P1147026	0.03919084	up	2.3217444	2.3217444	1.2152091	LOC102548692	PREDICTED: Rattus norvegicus uncharacterized LOC102548692 (LOC102548692), transcript variant X2, ncRNA [XR_001839512]
A_44_P1097908	0.028911306	up	2.3084073	2.3084073	1.2068977
A_44_P1102553	0.013208586	up	2.308238	2.308238	1.206792	LOC102553014	PREDICTED: Rattus norvegicus uncharacterized LOC102553014 (LOC102553014), transcript variant X7, mRNA [XM_008760962]
A_44_P1144472	0.015807802	up	2.2956877	2.2956877	1.1989263
A_44_P1123549	0.017498432	up	2.2926495	2.2926495	1.1970158	LOC103695206	PREDICTED: Rattus norvegicus uncharacterized LOC103695206 (LOC103695206), ncRNA [XR_600627]
A_44_P1137865	0.025840774	up	2.2873168	2.2873168	1.1936562	LOC102548659	PREDICTED: Rattus norvegicus uncharacterized LOC102548659 (LOC102548659), ncRNA [XR_596694]
A_44_P1141451	0.03178084	up	2.280919	2.280919	1.1896152
A_44_P1136333	0.03341895	up	2.2610443	2.2610443	1.1769892
A_44_P1110323	0.021877196	up	2.241568	2.241568	1.1645083	Rundc1	PREDICTED: Rattus norvegicus RUN domain containing 1 (Rundc1), transcript variant X1, mRNA [XM_006247467]
A_44_P1154960	0.021510206	down	2.237626	-2.237626	-1.161969		vomeronasal 2 receptor, 3 [Source:RGD Symbol;Acc:1565892] [ENSRNOT00000044669]
A_44_P993951	0.020948017	up	2.2218761	2.2218761	1.1517783
A_44_P1364366	0.023008484	up	2.2160087	2.2160087	1.1479635	Pitpnm3	PITPNM family member 3 [Source:RGD Symbol;Acc:1308200] [ENSRNOT00000071764]
A_44_P961164	0.038324438	up	2.21318	2.21318	1.1461208	Rhbdl3	Rattus norvegicus rhomboid like 3 (Rhbdl3), mRNA [NM_001105819]
A_64_P053832	0.03953865	up	2.2077613	2.2077613	1.1425842	Tcp11l1	Rattus norvegicus t-complex 11 like 1 (Tcp11l1), mRNA [NM_001109202]
A_64_P154537	0.024976488	down	2.2077465	-2.2077465	-1.1425745	LOC681458	similar to stearoyl-coenzyme A desaturase 3 [Source:RGD Symbol;Acc:1595370] [ENSRNOT00000018090]
A_44_P1091650	0.037626103	up	2.204011	2.204011	1.1401314		PREDICTED: Rattus norvegicus ligand dependent nuclear receptor corepressor (Lcor), transcript variant X2, mRNA [XM_008760473]
A_44_P1131726	0.029173156	up	2.2039285	2.2039285	1.1400774
A_44_P1100694	0.044955652	up	2.1994395	2.1994395	1.1371359
A_44_P1366944	0.01829018	up	2.1982195	2.1982195	1.1363355
A_44_P1104718	0.026467497	up	2.1897824	2.1897824	1.1307875	LOC100910708	PREDICTED: Rattus norvegicus aldose reductase-related protein 1-like (LOC100910708), mRNA [XM_008762861]
A_44_P1114815	0.030740758	up	2.1838858	2.1838858	1.1268975
A_43_P22653	0.019744786	down	2.1809416	-2.1809416	-1.1249511	Rspo3	Rattus norvegicus R-spondin 3 (Rspo3), mRNA [NM_001100990]
A_44_P424989	0.0348036	up	2.1755693	2.1755693	1.121393		UI-R-A1-dp-f-04-0-UI.s1 UI-R-A1 Rattus norvegicus cDNA clone UI-R-A1-dp-f-04-0-UI 3', mRNA sequence [AA901213]
A_44_P1155669	0.030552657	up	2.1746168	2.1746168	1.1207612	Emilin2	elastin microfibril interfacer 2 [Source:RGD Symbol;Acc:1305343] [ENSRNOT00000056272]
A_44_P1096302	0.021357128	up	2.1627321	2.1627321	1.112855	Epha6	PREDICTED: Rattus norvegicus Eph receptor A6 (Epha6), transcript variant X3, mRNA [XM_008768648]
A_44_P793551	0.02412992	up	2.1510613	2.1510613	1.1050487	Lin28a	Rattus norvegicus lin-28 homolog A (Lin28a), mRNA [NM_001109269]
A_44_P1141725	0.016448198	up	2.1508822	2.1508822	1.1049285
A_44_P997940	0.046570536	up	2.1484046	2.1484046	1.1032656	Nrn1l	Rattus norvegicus neuritin 1-like (Nrn1l), mRNA [NM_001135006]
A_44_P1148194	0.046362977	up	2.1435878	2.1435878	1.1000276
A_43_P23115	0.04586884	down	2.1322536	-2.1322536	-1.0923791	Inmt	Rattus norvegicus indolethylamine N-methyltransferase (Inmt), mRNA [NM_001109022]
A_64_P227140	0.0331745	up	2.1295707	2.1295707	1.0905626	Triml2	Rattus norvegicus tripartite motif family-like 2 (Triml2), mRNA [NM_001191690]
A_64_P050303	0.04204111	up	2.1287138	2.1287138	1.089982	Spc25	Rattus norvegicus SPC25, NDC80 kinetochore complex component (Spc25), mRNA [NM_001009654]
A_44_P102574	0.01689005	up	2.1286035	2.1286035	1.0899072		GB
A_44_P1122743	0.026059479	up	2.1241434	2.1241434	1.0868812	LOC102548575	PREDICTED: Rattus norvegicus uncharacterized LOC102548575 (LOC102548575), ncRNA [XR_345300]
A_44_P1107573	0.017640147	up	2.1155052	2.1155052	1.0810022
A_64_P037015	0.028178463	up	2.115429	2.115429	1.0809501	Tas2r113	Rattus norvegicus taste receptor, type 2, member 113 (Tas2r113), mRNA [NM_001166689]
A_43_P13543	0.026669556	up	2.1057737	2.1057737	1.0743504		AMGNNUC:NRDG1-00086-C10-A nrdg1 (10855) Rattus norvegicus cDNA clone nrdg1-00086-c10 5', mRNA sequence [CB547815]
A_43_P13868	0.04325423	up	2.103936	2.103936	1.0730908	Tmem200a	Rattus norvegicus transmembrane protein 200A (Tmem200a), mRNA [NM_001109135]
A_44_P442546	0.018083138	up	2.1036212	2.1036212	1.0728749	Prm1	Rattus norvegicus protamine 1 (Prm1), mRNA [NM_001002850]
A_44_P1126292	0.020470472	up	2.1008844	2.1008844	1.0709968	LOC103692536	PREDICTED: Rattus norvegicus uncharacterized LOC103692536 (LOC103692536), ncRNA [XR_592834]
A_44_P501142	0.02931164	down	2.0963254	-2.0963254	-1.0678626	Srebf1	Rattus norvegicus sterol regulatory element binding transcription factor 1 (Srebf1), transcript variant 1, mRNA [NM_001276707]
A_44_P1143054	0.023996633	up	2.0953546	2.0953546	1.0671943	LOC102553769	PREDICTED: Rattus norvegicus uncharacterized LOC102553769 (LOC102553769), transcript variant X5, ncRNA [XR_590735]
A_44_P1108756	0.032888163	up	44806	4309-02-01	1.2814906	LOC302192	PREDICTED: Rattus norvegicus similar to RIKEN cDNA 1700001E04 (LOC302192), transcript variant X1, mRNA [XM_006253273]
A_44_P1141076	0.041248366	up	2.089612	2.089612	1.063235	LOC102555131	PREDICTED: Rattus norvegicus afadin-like (LOC102555131), transcript variant X2, mRNA [XM_006227953]
A_44_P142958	0.03573964	up	2.0857947	2.0857947	1.0605972		UI-R-E0-cm-g-05-0-UI.r1 UI-R-E0 Rattus norvegicus cDNA clone UI-R-E0-cm-g-05-0-UI 5', mRNA sequence [BF559508]
A_44_P1147578	0.033420064	up	2.082634	2.082634	1.0584093
A_44_P1361119	0.0342679	up	2.060065	2.060065	1.0426899
A_44_P1370368	0.022859666	up	2.0591748	2.0591748	1.0420662	LOC103694730	Y-linked testis-specific protein 1-like [Source:RGD Symbol;Acc:9357395] [ENSRNOT00000085512]
A_44_P1145935	0.03101898	up	2.0584009	2.0584009	1.0415239	LOC103692743	PREDICTED: Rattus norvegicus uncharacterized LOC103692743 (LOC103692743), ncRNA [XR_593224]
A_64_P114598	0.026379041	up	2.0583043	2.0583043	1.0414562	Nfic	Rattus norvegicus nuclear factor I/C (Nfic), mRNA [NM_031567]
A_64_P112802	0.019551741	up	2.05662	2.05662	1.0402752	Olr1247	Rattus norvegicus olfactory receptor 1247 (Olr1247), mRNA [NM_001000807]
A_44_P1096387	0.022483544	down	2.0540774	-2.0540774	-1.0384905	LOC100910650	uncharacterized LOC100910650 [Source:RGD Symbol;Acc:6497346] [ENSRNOT00000079753]
A_44_P1143051	0.02139927	up	2.0444713	2.0444713	1.0317278	LOC102553769	PREDICTED: Rattus norvegicus uncharacterized LOC102553769 (LOC102553769), transcript variant X5, ncRNA [XR_590735]
A_44_P1119402	0.022134023	up	2.0393636	2.0393636	1.028119	LOC103691380	PREDICTED: Rattus norvegicus uncharacterized LOC103691380 (LOC103691380), ncRNA [XR_590740]
A_44_P250900	0.03895938	down	2.026199	-2.026199	-1.0187759		Rattus norvegicus similar to Rpl7a protein (LOC313976), mRNA [XM_233984]
A_44_P1148253	0.022385918	up	2.0209088	2.0209088	1.0150043	LOC103693610	PREDICTED: Rattus norvegicus uncharacterized LOC103693610 (LOC103693610), ncRNA [XR_595197]
A_64_P038912	0.03569572	up	2.0207832	2.0207832	1.0149145		UI-R-FF0-cov-j-14-0-UI.s1 UI-R-FF0 Rattus norvegicus cDNA clone UI-R-FF0-cov-j-14-0-UI 3', mRNA sequence [BU758407]
A_44_P1101021	0.022124622	up	2.0196517	2.0196517	1.0141065	LOC102552731	PREDICTED: Rattus norvegicus uncharacterized LOC102552731 (LOC102552731), transcript variant X5, mRNA [XM_017590114]
A_44_P1104423	0.024909554	up	2.0167723	2.0167723	1.0120481	Rbm33	PREDICTED: Rattus norvegicus RNA binding motif protein 33 (Rbm33), transcript variant X1, mRNA [XM_017592677]
A_44_P1148472	0.041322466	up	2.0107455	2.0107455	1.0077305	LOC102556216	PREDICTED: Rattus norvegicus uncharacterized LOC102556216 (LOC102556216), ncRNA [XR_358755]
A_44_P1141440	0.04666292	up	2.00677	2.00677	1.0048752	LOC103690649	PREDICTED: Rattus norvegicus uncharacterized LOC103690649 (LOC103690649), ncRNA [XR_589490]
A_44_P1145478	0.036270984	up	2.0059135	2.0059135	1.0042593	LOC103692549	PREDICTED: Rattus norvegicus uncharacterized LOC103692549 (LOC103692549), ncRNA [XR_592866]
A_44_P1103007	0.022017758	up	2.0046358	2.0046358	1.0033401
A_44_P961519	0.039765358	down	2.004101	-2.004101	-1.0029552
A_44_P1135612	0.04658158	up	2.0035963	2.0035963	1.0025918	LOC102556466	PREDICTED: Rattus norvegicus uncharacterized LOC102556466 (LOC102556466), ncRNA [XR_340552]
A_44_P593049	0.043915637	down	1.9999937	-1.9999937	-0.9999954		Q8JZP8_MOUSE (Q8JZP8) Zfp689 protein, partial (19%) [TC611474]
A_44_P1102728	0.048826344	up	1.9983444	1.9983444	0.9988052
A_44_P869774	0.02983796	down	1.995945	-1.995945	-0.9970719	Clec1b	Rattus norvegicus C-type lectin domain family 1, member B (Clec1b), mRNA [NM_001191978]
A_44_P1124044	0.040637378	up	1.987537	1.987537	0.9909817		AGENCOURT_17839838 NIH_MGC_238 Rattus norvegicus cDNA clone IMAGE:7131180 5', mRNA sequence [CK596970]
A_44_P461952	0.041067217	up	1.984576	1.984576	0.9888308		Rattus norvegicus similar to Y-LINKED TESTIS-SPECIFIC PROTEIN (LOC298820), mRNA [XM_233901]
A_44_P1096556	0.0370778	up	1.9787189	1.9787189	0.9845666	Nxpe5l1	PREDICTED: Rattus norvegicus neurexophilin and PC-esterase domain family, member 5-like 1 (Nxpe5l1), transcript variant X3, mRNA [XM_008759318]
A_44_P1138623	0.03912089	up	1.9727547	1.9727547	0.98021156	LOC102550732	PREDICTED: Rattus norvegicus uncharacterized LOC102550732 (LOC102550732), ncRNA [XR_341861]
A_44_P1128937	0.03232247	up	1.9725101	1.9725101	0.9800327		Q66J06_XENLA (Q66J06) MGC83600 protein, partial (15%) [TC605550]
A_44_P1148942	0.029707853	up	1.9710721	1.9710721	0.97898054
A_44_P1122783	0.04381425	up	1.9682351	1.9682351	0.97690254
A_44_P1161440	0.048647042	up	1.9602801	1.9602801	0.9710598	Il15	PREDICTED: Rattus norvegicus interleukin 15 (Il15), transcript variant X2, mRNA [XM_008774217]
A_44_P339714	0.04551761	down	1.9587799	-1.9587799	-0.9699553	Vom2r-ps24	GB
A_44_P496643	0.025321968	down	1.9556084	-1.9556084	-0.96761745
A_44_P1097091	0.026301542	up	1.9554559	1.9554559	0.967505
A_44_P1089561	0.034108195	up	1.9545325	1.9545325	0.9668236	Sbsn	Rattus norvegicus suprabasin (Sbsn), transcript variant 1, mRNA [NM_001198590]
A_44_P515275	0.025451086	up	1.9523482	1.9523482	0.9652104	Cdkn1a	Rattus norvegicus cyclin-dependent kinase inhibitor 1A (Cdkn1a), mRNA [NM_080782]
A_64_P100963	0.03631097	up	1.9461987	1.9461987	0.960659		non-SMC condensin I complex, subunit H [Source:RGD Symbol;Acc:1596799] [ENSRNOT00000016157]
A_44_P1141441	0.03196438	up	1.9406406	1.9406406	0.9565329
A_44_P1141456	0.043600198	up	1.9344333	1.9344333	0.95191103
A_44_P1099213	0.025662558	up	1.9326081	1.9326081	0.9505491	Rtl9	PREDICTED: Rattus norvegicus retrotransposon gag domain containing 1 (LOC100912526), transcript variant X1, mRNA [XM_003752123]
A_44_P750974	0.025965579	up	1.9318421	1.9318421	0.94997716		Q4S2Z6_TETNG (Q4S2Z6) Chromosome 3 SCAF14756, whole genome shotgun sequence. (Fragment), partial (7%) [TC603898]
A_44_P246311	0.030227426	down	1.928512	-1.928512	-0.94748807	Rmnd5b	Rattus norvegicus required for meiotic nuclear division 5 homolog B (Rmnd5b), mRNA [NM_001017473]
A_44_P1141528	0.033215955	up	1.9273665	1.9273665	0.9466309
A_44_P321716	0.029191537	up	1.9235837	1.9235837	0.94379663		UI-R-E1-ff-a-04-0-UI.s1 UI-R-E1 Rattus norvegicus cDNA clone UI-R-E1-ff-a-04-0-UI 3', mRNA sequence [AA955932]
A_43_P15977	0.033922214	up	1.9223082	1.9223082	0.9428396		445481 Rat lymphocyte Rattus norvegicus cDNA, mRNA sequence [BM299613]
A_42_P668126	0.04087398	up	1.9204093	1.9204093	0.9414138	Sema6c	Rattus norvegicus semaphorin 6C (Sema6c), mRNA [NM_017308]
A_64_P054886	0.04015227	up	1.9200076	1.9200076	0.941112	Hemgn	Rattus norvegicus hemogen (Hemgn), mRNA [NM_133294]
A_44_P1105837	0.03452093	up	1.9198922	1.9198922	0.9410253	Elavl2	Rattus norvegicus ELAV like RNA binding protein 2 (Elavl2), mRNA [NM_001302217]
A_44_P555271	0.047948383	down	1.9127783	-1.9127783	-0.9356696	Mmp12	Rattus norvegicus matrix metallopeptidase 12 (Mmp12), mRNA [NM_053963]
A_44_P1159939	0.036845423	up	1.909328	1.909328	0.93306494	Sbpl	Rattus norvegicus spermine binding protein-like (Sbpl), mRNA [NM_001108823]
A_44_P1102658	0.043565787	up	1.9067272	1.9067272	0.93109846		Q2EUX1_ECOLI (Q2EUX1) PabB (Fragment), partial (5%) [TC628637]
A_44_P1141525	0.042591486	up	1.9043543	1.9043543	0.9293019
A_44_P1108240	0.046804696	up	1.9037817	1.9037817	0.928868	Dapk2	PREDICTED: Rattus norvegicus death-associated protein kinase 2 (Dapk2), transcript variant X1, mRNA [XM_008766241]
A_44_P1121512	0.03920855	up	1.9034127	1.9034127	0.9285884	LOC108351590	PREDICTED: Rattus norvegicus uncharacterized LOC108351590 (LOC108351590), ncRNA [XR_001839085]
A_44_P1365547	0.038849946	up	1.9032286	1.9032286	0.92844886
A_44_P1153803	0.033465367	up	1.8930471	1.8930471	0.92071027	Atp8b5p	ATPase, class I, type 8B, member 5, pseudogene [Source:RGD Symbol;Acc:1587460] [ENSRNOT00000071201]
A_44_P1090385	0.04247117	up	1.8876019	1.8876019	0.91655445	Ccr5	Rattus norvegicus chemokine (C-C motif) receptor 5 (Ccr5), mRNA [NM_053960]
A_44_P116300	0.029213201	up	1.8863058	1.8863058	0.9155636	Ppargc1b	Rattus norvegicus PPARG coactivator 1 beta (Ppargc1b), mRNA [NM_176075]
A_44_P1150019	0.028612057	up	1.8853179	1.8853179	0.9148078	Tbc1d7	PREDICTED: Rattus norvegicus TBC1 domain family, member 7 (Tbc1d7), transcript variant X3, mRNA [XM_006253832]
A_44_P1133364	0.030364854	up	1.8815916	1.8815916	0.9119535	LOC108352422	PREDICTED: Rattus norvegicus uncharacterized LOC108352422 (LOC108352422), ncRNA [XR_001840639]
A_44_P1114123	0.043411292	up	1.8786764	1.8786764	0.9097166	LOC103694037	PREDICTED: Rattus norvegicus pterin-4-alpha-carbinolamine dehydratase 2-like (LOC103694037), transcript variant X3, mRNA [XM_008771511]
A_44_P1092952	0.038382854	up	1.8785326	1.8785326	0.90960616	LOC102554398	PREDICTED: Rattus norvegicus uncharacterized LOC102554398 (LOC102554398), transcript variant X3, mRNA [XM_008775645]
A_44_P723176	0.034568414	up	1.8705016	1.8705016	0.9034252		UI-R-CN1-cjg-p-11-0-UI.s1 UI-R-CN1 Rattus norvegicus cDNA clone UI-R-CN1-cjg-p-11-0-UI 3', mRNA sequence [BM386686]
A_44_P1130302	0.029825388	down	1.8696827	-1.8696827	-0.9027934
A_64_P109984	0.03326993	up	1.8693548	1.8693548	0.90254045	Srcin1	Rattus norvegicus SRC kinase signaling inhibitor 1 (Srcin1), mRNA [NM_019378]
A_44_P885402	0.029998533	up	1.86726	1.86726	0.9009228	Asb4	ankyrin repeat and SOCS box-containing 4 [Source:RGD Symbol;Acc:1563114] [ENSRNOT00000012657]
A_64_P047661	0.033161707	up	1.8667662	1.8667662	0.90054125	Tmem211	transmembrane protein 211 [Source:RGD Symbol;Acc:1584759] [ENSRNOT00000092480]
A_44_P653949	0.03217233	up	1.860033	1.860033	0.8953282		FM116224 etnohea Rattus norvegicus cDNA clone etnoheaP0034M04 5', mRNA sequence [FM116224]
A_44_P1098688	0.0461316	up	1.8589957	1.8589957	0.8945234	Krtap12-2	keratin associated protein 12-2 [Source:RGD Symbol;Acc:2319746] [ENSRNOT00000079725]
A_44_P1137203	0.04258767	up	1.8552483	1.8552483	0.8916123	LOC103693996	PREDICTED: Rattus norvegicus uncharacterized LOC103693996 (LOC103693996), ncRNA [XR_596528]
A_44_P1096939	0.0362572	up	1.8542864	1.8542864	0.8908641	Syt14	PREDICTED: Rattus norvegicus synaptotagmin 14 (Syt14), transcript variant X1, mRNA [XM_008763936]
A_44_P1080869	0.030767772	up	1.8518246	1.8518246	0.8889475	Alk	Rattus norvegicus anaplastic lymphoma receptor tyrosine kinase (Alk), mRNA [NM_001169101]
A_44_P310714	0.039313186	up	1.8470707	1.8470707	0.88523906
A_44_P550602	0.0316808	up	1.8347701	1.8347701	0.87559927	Slc6a16	solute carrier family 6, member 16 [Source:RGD Symbol;Acc:1561338] [ENSRNOT00000033882]
A_64_P086784	0.038952608	up	1.8318386	1.8318386	0.8732924	Runx1t1	Rattus norvegicus RUNX1 translocation partner 1 (Runx1t1), mRNA [NM_001108657]
A_44_P1110154	0.034724686	up	1.8262386	1.8262386	0.86887527
A_44_P491261	0.03680266	up	1.8250592	1.8250592	0.8679432		UI-R-BS1-ays-c-07-0-UI.s1 UI-R-BS1 Rattus norvegicus cDNA clone UI-R-BS1-ays-c-07-0-UI 3', mRNA sequence [BE107308]
A_44_P1131065	0.032658905	up	1.8203578	1.8203578	0.86422205	LOC102549764	PREDICTED: Rattus norvegicus uncharacterized LOC102549764 (LOC102549764), ncRNA [XR_357345]
A_64_P043199	0.04910903	up	1.8195809	1.8195809	0.8636062	Vom2r67	Rattus norvegicus vomeronasal 2 receptor, 67 (Vom2r67), mRNA [NM_001099485]
A_44_P1089621	0.036422353	up	1.8130926	1.8130926	0.8584526	Hmgcll1	Rattus norvegicus 3-hydroxymethyl-3-methylglutaryl-CoA lyase-like 1 (Hmgcll1), mRNA [NM_001276472]
A_43_P22429	0.041430134	up	1.8061804	1.8061804	0.85294193	Gmps	UI-R-C2p-rp-d-01-0-UI.s1 UI-R-C2p Rattus norvegicus cDNA clone UI-R-C2p-rp-d-01-0-UI 3', mRNA sequence [AI556905]
A_44_P1112073	0.034069203	up	1.8053943	1.8053943	0.85231394	Rgs16	regulator of G-protein signaling 16 [Source:RGD Symbol;Acc:1589741] [ENSRNOT00000032236]
A_44_P1137370	0.03929983	up	1.8012043	1.8012043	0.84896183	LOC103694009	PREDICTED: Rattus norvegicus uncharacterized LOC103694009 (LOC103694009), ncRNA [XR_596560]
A_44_P1141920	0.035329048	up	1.7991391	1.7991391	0.8473067
A_44_P1144140	0.039215434	up	1.7956938	1.7956938	0.8445413	LOC102549661	PREDICTED: Rattus norvegicus uncharacterized LOC102549661 (LOC102549661), ncRNA [XR_352581]
A_44_P1139867	0.047151998	up	1.795147	1.795147	0.8441019	LOC103694361	PREDICTED: Rattus norvegicus uncharacterized LOC103694361 (LOC103694361), ncRNA [XR_597305]
A_44_P1142112	0.04706648	up	1.7930981	1.7930981	0.8424544
A_44_P1094050	0.04435715	up	1.7915502	1.7915502	0.8412084	LOC102557053	PREDICTED: Rattus norvegicus uncharacterized LOC102557053 (LOC102557053), transcript variant X3, mRNA [XM_017603214]
A_44_P1098021	0.039940298	up	1.7911085	1.7911085	0.84085274	Hist1h2bf	PREDICTED: Rattus norvegicus histone cluster 1, H2bf (Hist1h2bf), mRNA [XM_001061682]
A_44_P1129867	0.04976884	up	1.7891217	1.7891217	0.8392516	LOC102557166	PREDICTED: Rattus norvegicus uncharacterized LOC102557166 (LOC102557166), transcript variant X4, ncRNA [XR_589080]
A_44_P1133192	0.043524057	up	1.7842094	1.7842094	0.8352849	LOC103690800	PREDICTED: Rattus norvegicus uncharacterized LOC103690800 (LOC103690800), transcript variant X8, ncRNA [XR_589638]
A_44_P1141864	0.04655763	up	1.7822497	1.7822497	0.83369946		CR476389 Rat pBluescript Lion Rattus norvegicus cDNA clone LIONp463H07123 3', mRNA sequence [CR476389]
A_44_P1080924	0.037988994	down	1.7783643	-1.7783643	-0.8305509	Ly49i9	Rattus norvegicus Ly49 inhibitory receptor 9 (Ly49i9), mRNA [NM_001009496]
A_44_P1140406	0.039044872	up	1.7769207	1.7769207	0.82937926	LOC102546853	PREDICTED: Rattus norvegicus uncharacterized LOC102546853 (LOC102546853), ncRNA [XR_343926]
A_44_P1135333	0.03849133	up	1.7765167	1.7765167	0.8290512	LOC103693175	PREDICTED: Rattus norvegicus uncharacterized LOC103693175 (LOC103693175), transcript variant X1, ncRNA [XR_594176]
A_64_P099915	0.0382741	down	1.7704607	-1.7704607	-0.8241248	Triap1	Rattus norvegicus TP53 regulated inhibitor of apoptosis 1 (Triap1), mRNA [NM_001126099]
A_44_P1124381	0.044134516	up	1.7677408	1.7677408	0.8219068	LOC102553981	PREDICTED: Rattus norvegicus uncharacterized LOC102553981 (LOC102553981), ncRNA [XR_600825]
A_44_P1141141	0.041120507	up	1.7627332	1.7627332	0.8178141	LOC108353213	PREDICTED: Rattus norvegicus uncharacterized LOC108353213 (LOC108353213), transcript variant X1, ncRNA [XR_001842386]
A_44_P1138942	0.040183343	up	1.7614772	1.7614772	0.8167858
A_44_P1366790	0.046190992	down	1.7496767	-1.7496767	-0.8070884	Krtap1-5	Rattus norvegicus keratin associated protein 1-5 (Krtap1-5), mRNA [NM_001025135]
A_44_P635379	0.041718293	up	1.7483827	1.7483827	0.806021		UI-R-CA0-bht-g-08-0-UI.s2 UI-R-CA0 Rattus norvegicus cDNA clone UI-R-CA0-bht-g-08-0-UI 3', mRNA sequence [BF399591]
A_44_P1129017	0.044579864	up	1.7435217	1.7435217	0.8020043	LOC102552294	PREDICTED: Rattus norvegicus uncharacterized LOC102552294 (LOC102552294), transcript variant X2, ncRNA [XR_593781]
A_64_P101573	0.04569938	up	1.7276474	1.7276474	0.7888088	Idnk	Rattus norvegicus Idnk, gluconokinase (Idnk), mRNA [NM_001037362]
A_44_P1095509	0.045203734	up	1.723717	1.723717	0.7855229		Rattus norvegicus chromosome 8, 41 clones, strain BN/SsNHsdMCW RNOR03311924, whole genome shotgun sequence [AABR03062736]
A_44_P1138214	0.049151443	up	1.7224452	1.7224452	0.7844581	LOC103694124	PREDICTED: Rattus norvegicus uncharacterized LOC103694124 (LOC103694124), ncRNA [XR_598197]
A_44_P1108048	0.049915556	up	1.7184972	1.7184972	0.7811475
A_44_P1124905	0.04624092	up	1.7032425	1.7032425	0.7682839
A_44_P1370504	0.049030397	up	1.702503	1.702503	0.7676573	Zfp646	zinc finger protein 646 [Source:RGD Symbol;Acc:1561579] [ENSRNOT00000036187]

## Sheet: AuNPs Liver
ProbeName	p value	Regulation	FC (abs)	FC	Log FC	GeneSymbol	Description
A_64_P085530	5.715431E-4	down	103.52201	-103.52201	-6.693794	Scd	Rattus norvegicus stearoyl-CoA desaturase (Scd), mRNA [NM_139192]
A_43_P12619	8.057164E-6	up	63.8121	63.8121	5.995758	Nr4a3	Rattus norvegicus nuclear receptor subfamily 4, group A, member 3 (Nr4a3), mRNA [NM_031628]
A_42_P836392	0.002253427	down	56.69796	-56.69796	-5.825225	Elovl6	Rattus norvegicus ELOVL fatty acid elongase 6 (Elovl6), mRNA [NM_134383]
A_64_P111315	2.4291381E-4	down	55.066063	-55.066063	-5.7830915	Ropn1l	Rattus norvegicus rhophilin associated tail protein 1-like (Ropn1l), mRNA [NM_001191086]
A_44_P428691	0.0014878293	down	49.325325	-49.325325	-5.6242566	Elovl6	Rattus norvegicus ELOVL fatty acid elongase 6 (Elovl6), mRNA [NM_134383]
A_44_P654444	5.5105106E-6	up	41.06677	41.06677	5.3598995	Nr4a3	PREDICTED: Rattus norvegicus nuclear receptor subfamily 4, group A, member 3 (Nr4a3), transcript variant X1, mRNA [XM_008763702]
A_44_P1127297	2.2859023E-5	up	38.745354	38.745354	5.2759514	LOC103692696	PREDICTED: Rattus norvegicus uncharacterized LOC103692696 (LOC103692696), ncRNA [XR_593174]
A_64_P091935	6.074714E-4	down	38.399693	-38.399693	-5.263023	Scd4	stearoyl-coenzyme A desaturase 4 [Source:RGD Symbol;Acc:1563648] [ENSRNOT00000017834]
A_44_P1135742	0.016176902	down	37.28277	-37.28277	-5.220437	LOC102547310	PREDICTED: Rattus norvegicus uncharacterized LOC102547310 (LOC102547310), transcript variant X2, ncRNA [XR_001841295]
A_44_P235978	5.016456E-5	down	36.966965	-36.966965	-5.2081647	Fasn	Rattus norvegicus fatty acid synthase (Fasn), mRNA [NM_017332]
A_44_P845543	1.2090683E-4	up	32.277073	32.277073	5.012438	Onecut1	PREDICTED: Rattus norvegicus one cut homeobox 1 (Onecut1), transcript variant X1, mRNA [XM_006243404]
A_43_P19879	1.0512428E-5	down	31.813951	-31.813951	-4.9915876	LOC689770	Rattus norvegicus similar to osteoclast inhibitory lectin (LOC689770), mRNA [NM_001142304]
A_43_P11975	0.04782117	down	30.618238	-30.618238	-4.9363194	Tsx	Rattus norvegicus testis specific X-linked gene (Tsx), mRNA [NM_019203]
A_42_P473398	0.0017999172	down	30.546612	-30.546612	-4.9329405	Cxcl1	Rattus norvegicus C-X-C motif chemokine ligand 1 (Cxcl1), mRNA [NM_030845]
A_44_P1135099	2.58733E-4	up	30.322174	30.322174	4.9223013	LOC102555010	PREDICTED: Rattus norvegicus uncharacterized LOC102555010 (LOC102555010), transcript variant X2, ncRNA [XR_340306]
A_44_P1161910	0.0032011755	down	29.695843	-29.695843	-4.892189	LOC102549542	PREDICTED: Rattus norvegicus elongation of very long chain fatty acids protein 6-like (LOC102549542), mRNA [XM_008761485]
A_44_P1142112	0.0023267637	up	29.472004	29.472004	4.8812733
A_43_P11832	5.832152E-4	down	28.738455	-28.738455	-4.8449106	Sqle	Rattus norvegicus squalene epoxidase (Sqle), mRNA [NM_017136]
A_44_P653304	0.030273903	down	28.538261	-28.538261	-4.8348255	Pnpla3	Rattus norvegicus patatin-like phospholipase domain containing 3 (Pnpla3), mRNA [NM_001282324]
A_44_P883462	1.1142442E-5	down	27.356728	-27.356728	-4.7738237		kelch repeat and BTB domain containing 12 [Source:RGD Symbol;Acc:1585999] [ENSRNOT00000079575]
A_44_P1160383	2.6906935E-5	down	26.53114	-26.53114	-4.7296147	LOC689770	Rattus norvegicus similar to osteoclast inhibitory lectin (LOC689770), mRNA [NM_001142304]
A_64_P012232	1.6857077E-4	down	25.778442	-25.778442	-4.688093	Sqle	Rattus norvegicus squalene epoxidase (Sqle), mRNA [NM_017136]
A_44_P374390	0.026394986	down	23.972694	-23.972694	-4.58332	LOC102549542	PREDICTED: Rattus norvegicus elongation of very long chain fatty acids protein 6-like (LOC102549542), mRNA [XM_008761485]
A_44_P1085313	7.2311924E-4	down	22.689531	-22.689531	-4.503955	Rrm2	Rattus norvegicus ribonucleotide reductase regulatory subunit M2 (Rrm2), mRNA [NM_001025740]
A_44_P1122127	6.8301364E-4	down	21.457697	-21.457697	-4.4234233	LOC103691848	PREDICTED: Rattus norvegicus uncharacterized LOC103691848 (LOC103691848), ncRNA [XR_600268]
A_44_P306840	6.110194E-5	down	20.900723	-20.900723	-4.385481	Ddhd1	Rattus norvegicus DDHD domain containing 1 (Ddhd1), mRNA [NM_001033066]
A_44_P1148977	6.282244E-4	up	20.828966	20.828966	4.3805194	LOC102555010	PREDICTED: Rattus norvegicus uncharacterized LOC102555010 (LOC102555010), transcript variant X1, ncRNA [XR_359564]
A_44_P1163000	0.00779019	up	20.36291	20.36291	4.347872
A_64_P154537	0.002752961	down	19.565361	-19.565361	-4.29023	LOC681458	similar to stearoyl-coenzyme A desaturase 3 [Source:RGD Symbol;Acc:1595370] [ENSRNOT00000018090]
A_44_P362981	3.6887935E-4	down	19.554247	-19.554247	-4.28941	Fabp5	Rattus norvegicus fatty acid binding protein 5, epidermal (Fabp5), mRNA [NM_145878]
A_44_P1137086	0.0010900787	down	19.48846	-19.48846	-4.2845483	LOC102553540	PREDICTED: Rattus norvegicus uncharacterized LOC102553540 (LOC102553540), transcript variant X5, ncRNA [XR_597541]
A_44_P1160738	0.0019217562	down	19.35894	-19.35894	-4.274928	LOC689757	Rattus norvegicus similar to osteoclast inhibitory lectin (LOC689757), mRNA [NM_001101019]
A_44_P1083098	0.0024705115	down	18.92802	-18.92802	-4.2424517	Idi1	Rattus norvegicus isopentenyl-diphosphate delta isomerase 1 (Idi1), mRNA [NM_053539]
A_64_P076638	9.286369E-4	down	18.760788	-18.760788	-4.2296486	Idi1	Rattus norvegicus isopentenyl-diphosphate delta isomerase 1 (Idi1), mRNA [NM_053539]
A_44_P496643	4.0025573E-4	down	18.037033	-18.037033	-4.17289
A_44_P1102458	3.5847034E-4	down	17.948805	-17.948805	-4.165816	Fabp5	Rattus norvegicus fatty acid binding protein 5, epidermal (Fabp5), mRNA [NM_145878]
A_44_P1100459	3.082008E-4	up	17.862003	17.862003	4.158822	LOC108348215	zinc finger protein 420-like [Source:RGD Symbol;Acc:11371780] [ENSRNOT00000089298]
A_64_P104469	0.0011083562	down	17.667913	-17.667913	-4.1430597	Spag5	Rattus norvegicus sperm associated antigen 5 (Spag5), mRNA [NM_001044224]
A_64_P120342	6.029033E-4	up	17.283052	17.283052	4.111286	Onecut1	Rattus norvegicus one cut homeobox 1 (Onecut1), mRNA [NM_022671]
A_44_P1141515	0.009187177	up	16.936184	16.936184	4.082037
A_44_P1117259	2.4443556E-4	down	16.487242	-16.487242	-4.043278	LOC103690956	PREDICTED: Rattus norvegicus uncharacterized LOC103690956 (LOC103690956), ncRNA [XR_589916]
A_64_P002854	0.001022413	down	16.349468	-16.349468	-4.031172	Ckap2	Rattus norvegicus cytoskeleton associated protein 2 (Ckap2), mRNA [NM_001169139]
A_44_P1148860	0.0023430332	down	15.846979	-15.846979	-3.986136	LOC103693732	PREDICTED: Rattus norvegicus uncharacterized LOC103693732 (LOC103693732), ncRNA [XR_595742]
A_44_P1133099	0.001644542	down	15.217918	-15.217918	-3.927699	LOC102549932	PREDICTED: Rattus norvegicus uncharacterized LOC102549932 (LOC102549932), ncRNA [XR_358411]
A_64_P050303	0.01615234	down	14.273715	-14.273715	-3.835289	Spc25	Rattus norvegicus SPC25, NDC80 kinetochore complex component (Spc25), mRNA [NM_001009654]
A_42_P686078	0.0047743125	up	14.245254	14.245254	3.8324094		adipogenin [Source:RGD Symbol;Acc:2320953] [ENSRNOT00000050465]
A_43_P16774	2.661642E-4	down	14.216999	-14.216999	-3.829545	Acat2	Rattus norvegicus acetyl-CoA acetyltransferase 2 (Acat2), mRNA [NM_001006995]
A_64_P026943	9.303818E-5	down	14.183023	-14.183023	-3.8260932	Gck	Rattus norvegicus glucokinase (Gck), transcript variant 1, mRNA [NM_001270849]
A_64_P037515	5.9404458E-5	down	13.88379	-13.88379	-3.7953296		immunoreceptor Ly49si1 [Source:RGD Symbol;Acc:1359487] [ENSRNOT00000081946]
A_64_P013243	6.771125E-4	down	13.643141	-13.643141	-3.770104		fatty acid-binding protein, epidermal pseudogene [Source:RGD Symbol;Acc:9111077] [ENSRNOT00000029774]
A_44_P1113286	5.7923154E-4	down	13.620671	-13.620671	-3.767726	LOC108349777	PREDICTED: Rattus norvegicus endogenous retrovirus group K member 9 Pol protein-like (LOC108349777), mRNA [XM_017590458]
A_42_P580844	0.006713494	down	13.608542	-13.608542	-3.7664406	Cdk1	Rattus norvegicus cyclin-dependent kinase 1 (Cdk1), mRNA [NM_019296]
A_44_P1145419	0.0025714848	down	13.550963	-13.550963	-3.7603235	LOC103692533	PREDICTED: Rattus norvegicus uncharacterized LOC103692533 (LOC103692533), transcript variant X2, ncRNA [XR_601326]
A_64_P150371	0.0011798362	down	13.135129	-13.135129	-3.7153585	Ndc80	Rattus norvegicus NDC80 kinetochore complex component (Ndc80), mRNA [NM_001126270]
A_64_P089445	5.436573E-4	down	12.87773	-12.87773	-3.6868064	Erich5	glutamate-rich 5 [Source:RGD Symbol;Acc:1590540] [ENSRNOT00000007816]
A_44_P1143026	0.006313608	up	12.711164	12.711164	3.6680243
A_64_P085112	2.7647874E-4	down	12.576573	-12.576573	-3.652667	Acly	Rattus norvegicus ATP citrate lyase (Acly), transcript variant 1, mRNA [NM_016987]
A_44_P1142032	3.893079E-4	down	12.412012	-12.412012	-3.633665	Acat2	Rattus norvegicus acetyl-CoA acetyltransferase 2 (Acat2), mRNA [NM_001006995]
A_64_P001741	0.008617773	down	12.33363	-12.33363	-3.6245255	Ccna2	Rattus norvegicus cyclin A2 (Ccna2), mRNA [NM_053702]
A_44_P1128202	0.01181732	down	12.229948	-12.229948	-3.6123464	LOC103692882	PREDICTED: Rattus norvegicus uncharacterized LOC103692882 (LOC103692882), ncRNA [XR_593486]
A_44_P976992	0.0010701066	up	12.192596	12.192596	3.6079335
A_44_P250028	0.002485558	down	12.154987	-12.154987	-3.6034765	Ppp1r3b	Rattus norvegicus protein phosphatase 1, regulatory subunit 3B (Ppp1r3b), mRNA [NM_138912]
A_64_P099900	0.04853099	down	12.052573	-12.052573	-3.5912693	Kap	Rattus norvegicus kidney androgen regulated protein (Kap), mRNA [NM_052802]
A_44_P1115005	7.880016E-5	down	12.04761	-12.04761	-3.590675	Chsy3	chondroitin sulfate synthase 3 [Source:RGD Symbol;Acc:1560819] [ENSRNOT00000075483]
A_44_P1147144	2.1323342E-4	up	12.04592	12.04592	3.5904727	LOC103692748	PREDICTED: Rattus norvegicus uncharacterized LOC103692748 (LOC103692748), ncRNA [XR_593230]
A_44_P1104703	2.018745E-4	down	11.972287	-11.972287	-3.581627
A_64_P131086	7.902144E-4	up	11.960808	11.960808	3.5802429	Rab30	Rattus norvegicus RAB30, member RAS oncogene family (Rab30), mRNA [NM_001015012]
A_44_P1158221	2.4847014E-4	up	11.810426	11.810426	3.561989	Rab30	PREDICTED: Rattus norvegicus RAB30, member RAS oncogene family (Rab30), transcript variant X4, mRNA [XM_008759647]
A_64_P049423	2.3240584E-4	up	11.756207	11.756207	3.5553508	Sds	Rattus norvegicus serine dehydratase (Sds), mRNA [NM_053962]
A_44_P1148253	1.3925994E-4	up	11.591111	11.591111	3.534947	LOC103693610	PREDICTED: Rattus norvegicus uncharacterized LOC103693610 (LOC103693610), ncRNA [XR_595197]
A_44_P1364260	8.801855E-5	down	11.554427	-11.554427	-3.5303738		kelch repeat and BTB domain containing 12 [Source:RGD Symbol;Acc:1585999] [ENSRNOT00000085730]
A_44_P1117220	5.8320555E-4	up	11.290461	11.290461	3.4970324	LOC102556539	PREDICTED: Rattus norvegicus uncharacterized LOC102556539 (LOC102556539), transcript variant X1, mRNA [XM_008775294]
A_44_P1129663	0.0010859941	up	11.226229	11.226229	3.4888015	LOC102549203	PREDICTED: Rattus norvegicus uncharacterized LOC102549203 (LOC102549203), transcript variant X1, ncRNA [XR_589034]
A_44_P326133	0.002258735	down	11.108992	-11.108992	-3.473656		Rattus norvegicus similar to Fatty acid-binding protein, epidermal (E-FABP) (Cutaneous fatty acid-binding protein) (C-FABP) (DA11) (LOC296723), mRNA [XM_231258]
A_64_P060667	0.0014378225	down	10.953607	-10.953607	-3.453334	Reg4	Rattus norvegicus regenerating family member 4 (Reg4), mRNA [NM_001004096]
A_44_P1141610	0.020101633	up	10.939912	10.939912	3.4515293
A_64_P022283	0.001169812	down	10.902585	-10.902585	-3.4465983	Ropn1	Rattus norvegicus rhophilin associated tail protein 1 (Ropn1), mRNA [NM_001025628]
A_43_P12366	0.0010133971	down	10.776896	-10.776896	-3.42987	Aacs	Rattus norvegicus acetoacetyl-CoA synthetase (Aacs), mRNA [NM_023104]
A_44_P1120083	3.1165715E-4	up	10.771692	10.771692	3.429173	LOC103691485	PREDICTED: Rattus norvegicus uncharacterized LOC103691485 (LOC103691485), ncRNA [XR_590956]
A_44_P1144359	8.272593E-4	up	10.607615	10.607615	3.4070284	LOC102550673	PREDICTED: Rattus norvegicus uncharacterized LOC102550673 (LOC102550673), transcript variant X1, ncRNA [XR_001837409]
A_44_P1087338	0.0014949152	down	10.560555	-10.560555	-3.4006138	Rec114	Rattus norvegicus REC114 meiotic recombination protein (Rec114), mRNA [NM_001106825]
A_43_P11520	5.7825644E-4	down	10.509006	-10.509006	-3.3935542	Thrsp	Rattus norvegicus thyroid hormone responsive (Thrsp), mRNA [NM_012703]
A_64_P158653	0.011504303	down	10.464081	-10.464081	-3.3873737	Knstrn	Rattus norvegicus kinetochore-localized astrin/SPAG5 binding protein (Knstrn), mRNA [NM_001004264]
A_64_P133289	9.465554E-5	up	10.368964	10.368964	3.3741999	Dact1	PREDICTED: Rattus norvegicus dishevelled-binding antagonist of beta-catenin 1 (Dact1), transcript variant X3, mRNA [XM_001077448]
A_44_P1150376	0.00167015	down	10.35865	-10.35865	-3.372764	LOC102553272	PREDICTED: Rattus norvegicus uncharacterized LOC102553272 (LOC102553272), ncRNA [XR_361431]
A_44_P1146807	0.004857358	up	10.34659	10.34659	3.3710835	Nnmt	PREDICTED: Rattus norvegicus nicotinamide N-methyltransferase (Nnmt), transcript variant X1, mRNA [XM_008766195]
A_44_P1136681	5.33695E-4	up	10.326029	10.326029	3.3682137	LOC102550037	PREDICTED: Rattus norvegicus uncharacterized LOC102550037 (LOC102550037), ncRNA [XR_360319]
A_44_P1127781	9.7408716E-4	down	10.2496395	-10.2496395	-3.3575013	LOC102554269	PREDICTED: Rattus norvegicus uncharacterized LOC102554269 (LOC102554269), transcript variant X4, ncRNA [XR_001838805]
A_44_P1086769	0.0040477	down	10.227138	-10.227138	-3.3543305	Cdkn3	Rattus norvegicus cyclin-dependent kinase inhibitor 3 (Cdkn3), mRNA [NM_001106028]
A_44_P1106772	7.796681E-4	down	10.062404	-10.062404	-3.330903	LOC102549812	PREDICTED: Rattus norvegicus serum response factor homolog A-like (LOC102549812), transcript variant X1, mRNA [XM_006240217]
A_44_P531770	0.003197274	down	10.047051	-10.047051	-3.3287003	Top2a	Rattus norvegicus topoisomerase (DNA) II alpha (Top2a), mRNA [NM_022183]
A_64_P035291	0.002069775	down	10.026386	-10.026386	-3.3257298	Gsta3	Rattus norvegicus glutathione S-transferase alpha 3 (Gsta3), transcript variant 1, mRNA [NM_001009920]
A_44_P170907	7.6118624E-5	down	10.010774	-10.010774	-3.3234816		UI-R-BU0-amt-g-04-0-UI.r1 UI-R-BU0 Rattus norvegicus cDNA clone UI-R-BU0-amt-g-04-0-UI 5', mRNA sequence [BF564469]
A_42_P635007	7.14895E-4	down	9.974866	-9.974866	-3.3182974	Cyp51	Rattus norvegicus cytochrome P450, family 51 (Cyp51), mRNA [NM_012941]
A_44_P465188	2.0230118E-4	down	9.936986	-9.936986	-3.3128083	Fads1	Rattus norvegicus fatty acid desaturase 1 (Fads1), mRNA [NM_053445]
A_44_P1082289	3.650435E-4	down	9.902067	-9.902067	-3.3077297	Cyp51	Rattus norvegicus cytochrome P450, family 51 (Cyp51), mRNA [NM_012941]
A_42_P772937	0.02821707	down	9.873628	-9.873628	-3.3035803	Cenpw	Rattus norvegicus centromere protein W (Cenpw), mRNA [NM_001246319]
A_44_P1145250	6.1230833E-4	up	9.783385	9.783385	3.2903337	LOC102553953	PREDICTED: Rattus norvegicus uncharacterized LOC102553953 (LOC102553953), ncRNA [XR_592696]
A_64_P098921	0.010555597	down	9.773154	-9.773154	-3.2888243	Cdca3	Rattus norvegicus cell division cycle associated 3 (Cdca3), mRNA [NM_001007648]
A_44_P928928	9.877916E-4	down	9.733477	-9.733477	-3.2829552		PREDICTED: Rattus norvegicus farnesyl pyrophosphate synthase-like (RGD1565157), misc_RNA [XR_008813]
A_64_P147187	7.426592E-4	down	9.714803	-9.714803	-3.2801847
A_64_P103936	0.006328082	down	9.680039	-9.680039	-3.275013	Acot5	Rattus norvegicus acyl-CoA thioesterase 5 (Acot5), mRNA [NM_001079709]
A_42_P460021	0.0013923402	up	9.542295	9.542295	3.2543364	Adcy10	Rattus norvegicus adenylate cyclase 10 (soluble) (Adcy10), mRNA [NM_021684]
A_42_P794613	3.485561E-4	down	9.533917	-9.533917	-3.2530692	Mvd	Rattus norvegicus mevalonate diphosphate decarboxylase (Mvd), mRNA [NM_031062]
A_44_P1035148	7.9739164E-4	down	9.516225	-9.516225	-3.2503893	Ddhd1	Rattus norvegicus DDHD domain containing 1 (Ddhd1), mRNA [NM_001033066]
A_44_P1163846	3.6475644E-4	up	9.460703	9.460703	3.2419474	LOC108349800	PREDICTED: Rattus norvegicus uncharacterized LOC108349800 (LOC108349800), ncRNA [XR_001836245]
A_64_P021409	0.0032099576	up	9.339092	9.339092	3.2232823	LOC102556715	PREDICTED: Rattus norvegicus uncharacterized LOC102556715 (LOC102556715), transcript variant X2, mRNA [XM_017588357]
A_44_P1160978	1.5870141E-4	up	9.336316	9.336316	3.2228534		cytochrome P450 2B9-like [Source:RGD Symbol;Acc:9160854] [ENSRNOT00000040989]
A_44_P1111246	0.005851916	up	9.329152	9.329152	3.221746	LOC102557427	PREDICTED: Rattus norvegicus CD99 antigen-like protein 2-like (LOC102557427), transcript variant X3, mRNA [XM_008758237]
A_44_P1149576	6.949807E-5	up	9.2741165	9.2741165	3.2132099	Hacl1	2-hydroxyacyl-CoA lyase 1 [Source:RGD Symbol;Acc:619849] [ENSRNOT00000026588]
A_44_P135730	0.001408911	down	9.141165	-9.141165	-3.192378		PREDICTED: Rattus norvegicus farnesyl pyrophosphate synthase-like (RGD1561594), misc_RNA [XR_146458]
A_43_P13088	1.4707999E-4	down	9.029935	-9.029935	-3.1747155	Msmo1	Rattus norvegicus methylsterol monooxygenase 1 (Msmo1), mRNA [NM_080886]
A_44_P178671	2.3791296E-4	down	9.02756	-9.02756	-3.1743362		UI-R-DZ0-cmz-f-17-0-UI.s1 UI-R-DZ0 Rattus norvegicus cDNA clone UI-R-DZ0-cmz-f-17-0-UI 3', mRNA sequence [CN541679]
A_44_P837483	0.026931578	up	9.006908	9.006908	3.171032		UI-R-DZ0-cks-o-20-0-UI.s1 UI-R-DZ0 Rattus norvegicus cDNA clone UI-R-DZ0-cks-o-20-0-UI 3', mRNA sequence [BM384088]
A_42_P585995	0.009773658	up	8.996091	8.996091	3.1692982	Nim1k	NIM1 serine/threonine protein kinase [Source:RGD Symbol;Acc:1308116] [ENSRNOT00000021964]
A_43_P11654	0.025234926	down	8.934792	-8.934792	-3.159434	Pnoc	Rattus norvegicus prepronociceptin (Pnoc), mRNA [NM_013007]
A_64_P159448	4.6625125E-4	down	8.918652	-8.918652	-3.1568255
A_64_P100963	0.0065145497	down	8.84043	-8.84043	-3.1441166		non-SMC condensin I complex, subunit H [Source:RGD Symbol;Acc:1596799] [ENSRNOT00000016157]
A_42_P803673	0.0013237256	down	8.809776	-8.809776	-3.1391053	Wfdc21	Rattus norvegicus WAP four-disulfide core domain 21 (Wfdc21), mRNA [NM_001003706]
A_44_P577090	0.006397519	down	8.750565	-8.750565	-3.1293762	Rad51	Rattus norvegicus RAD51 recombinase (Rad51), mRNA [NM_001109204]
A_64_P157244	1.355153E-4	up	8.739973	8.739973	3.1276288	Sfxn2	Rattus norvegicus sideroflexin 2 (Sfxn2), mRNA [NM_001013072]
A_64_P066979	0.004627006	down	8.701301	-8.701301	-3.121231	Hist1h1b	Rattus norvegicus histone cluster 1 H1 family member b (Hist1h1b), mRNA [NM_001109417]
A_64_P152154	0.0032435525	down	8.698057	-8.698057	-3.1206932	Aldh1b1	Rattus norvegicus aldehyde dehydrogenase 1 family, member B1 (Aldh1b1), mRNA [NM_001011975]
A_64_P092026	1.0605197E-4	down	8.670048	-8.670048	-3.11604	Bhlha15	Rattus norvegicus basic helix-loop-helix family, member a15 (Bhlha15), mRNA [NM_012863]
A_44_P1086200	0.0056862896	up	8.6171465	8.6171465	3.1072102	Nr4a2	Rattus norvegicus nuclear receptor subfamily 4, group A, member 2 (Nr4a2), mRNA [NM_019328]
A_44_P1144938	0.023098374	down	8.505262	-8.505262	-3.0883558	LOC102546452	PREDICTED: Rattus norvegicus uncharacterized LOC102546452 (LOC102546452), transcript variant X2, ncRNA [XR_346334]
A_44_P1139877	6.664393E-5	up	8.473545	8.473545	3.0829656	Ccdc7	PREDICTED: Rattus norvegicus coiled-coil domain containing 7 (Ccdc7), transcript variant X1, mRNA [XM_017601463]
A_44_P1149761	0.0060038175	down	8.436271	-8.436271	-3.0766053	LOC103693974	PREDICTED: Rattus norvegicus uncharacterized LOC103693974 (LOC103693974), ncRNA [XR_596496]
A_44_P318767	2.2180978E-4	up	8.413176	8.413176	3.0726504	Rab30	RAB30, member RAS oncogene family [Source:RGD Symbol;Acc:1309507] [ENSRNOT00000092066]
A_43_P19016	0.0012388092	up	8.397827	8.397827	3.0700161		AMGNNUC:NRHY7-00044-H7-A nrhy7 (10850) Rattus norvegicus cDNA clone nrhy7-00044-h7 5', mRNA sequence [CB606098]
A_44_P1155094	0.01054614	up	8.301691	8.301691	3.0534053	Nim1k	NIM1 serine/threonine protein kinase [Source:RGD Symbol;Acc:1308116] [ENSRNOT00000021964]
A_44_P1157698	0.0014736344	up	8.070244	8.070244	3.0126123	Slc1a4	solute carrier family 1 member 4 [Source:RGD Symbol;Acc:735146] [ENSRNOT00000007002]
A_64_P126508	0.001036675	down	8.055721	-8.055721	-3.0100138	Lss	Rattus norvegicus lanosterol synthase (Lss), mRNA [NM_031049]
A_44_P1164496	0.0012047165	down	8.042934	-8.042934	-3.007722	Lss	Rattus norvegicus lanosterol synthase (Lss), mRNA [NM_031049]
A_44_P730320	0.01240514	down	8.022201	-8.022201	-3.003998	Ect2	Rattus norvegicus epithelial cell transforming 2 (Ect2), mRNA [NM_001108547]
A_64_P063641	1.3518386E-4	up	8.020366	8.020366	3.003668	LOC691414	PREDICTED: Rattus norvegicus hypothetical protein LOC691414 (LOC691414), transcript variant X5, mRNA [XM_017596696]
A_44_P1080655	0.0027852436	up	7.92068	7.92068	2.9856243	Upp2	Rattus norvegicus uridine phosphorylase 2 (Upp2), mRNA [NM_001106481]
A_44_P1164456	0.0043339445	down	7.875846	-7.875846	-2.9774349	Gsta3	Q498T5_RAT (Q498T5) Gsta3 protein, complete [TC583387]
A_64_P130683	8.9919666E-4	down	7.85965	-7.85965	-2.9744651	Acss2	Rattus norvegicus acyl-CoA synthetase short-chain family member 2 (Acss2), mRNA [NM_001107793]
A_44_P1099798	0.0070133777	up	7.842992	7.842992	2.971404	LOC100912653	PREDICTED: Rattus norvegicus uncharacterized LOC100912653 (LOC100912653), mRNA [XM_008758193]
A_44_P305482	0.029884012	up	7.8379993	7.8379993	2.9704854	Ppargc1a	Rattus norvegicus PPARG coactivator 1 alpha (Ppargc1a), mRNA [NM_031347]
A_44_P684795	0.018002488	up	7.8311567	7.8311567	2.9692254	Irs2	Rattus norvegicus insulin receptor substrate 2 (Irs2), mRNA [NM_001168633]
A_44_P104652	0.016662998	up	7.797325	7.797325	2.9629793	Slc38a2	Rattus norvegicus solute carrier family 38, member 2 (Slc38a2), mRNA [NM_181090]
A_42_P520891	0.027590627	down	7.776501	-7.776501	-2.9591212	Prc1	Rattus norvegicus protein regulator of cytokinesis 1 (Prc1), mRNA [NM_001107529]
A_44_P1151438	7.254586E-5	up	7.7554126	7.7554126	2.9552035
A_44_P930826	1.564059E-4	down	7.716946	-7.716946	-2.94803	Clec2dl1	C-type lectin domain family 2, member D [Source:RGD Symbol;Acc:620070] [ENSRNOT00000087850]
A_44_P1039606	0.030218381	down	7.7070026	-7.7070026	-2.9461699	Cenpt	Rattus norvegicus centromere protein T (Cenpt), mRNA [NM_001024257]
A_44_P1103731	0.0024646767	down	7.6073923	-7.6073923	-2.927402	LOC108349748	PREDICTED: Rattus norvegicus uncharacterized LOC108349748 (LOC108349748), mRNA [XM_017590430]
A_44_P1130986	0.027009018	up	7.5756617	7.5756617	2.921372	LOC103690585	PREDICTED: Rattus norvegicus uncharacterized LOC103690585 (LOC103690585), transcript variant X1, ncRNA [XR_001839923]
A_64_P142242	0.009500664	up	7.5664105	7.5664105	2.919609	Colq	Rattus norvegicus collagen like tail subunit of asymmetric acetylcholinesterase (Colq), mRNA [NM_019274]
A_44_P1011780	1.841307E-4	up	7.521099	7.521099	2.9109435	Pla2g12a	Rattus norvegicus phospholipase A2, group XIIA (Pla2g12a), mRNA [NM_001108565]
A_44_P358440	0.010471254	down	7.4953833	-7.4953833	-2.9060023	Nat8f3	N-acetyltransferase 8 (GCN5-related) family member 3 [Source:RGD Symbol;Acc:621607] [ENSRNOT00000021103]
A_44_P1082523	0.021003736	down	7.4734416	-7.4734416	-2.9017727	Kif22	Rattus norvegicus kinesin family member 22 (Kif22), mRNA [NM_001009645]
A_64_P021043	8.9185975E-5	down	7.406077	-7.406077	-2.8887095	Pcsk9	Rattus norvegicus proprotein convertase subtilisin/kexin type 9 (Pcsk9), mRNA [NM_199253]
A_44_P1117326	7.1798725E-4	down	7.311125	-7.311125	-2.8700933	LOC678796	PREDICTED: Rattus norvegicus similar to acetyl-Coenzyme A acetyltransferase 2 (LOC678796), transcript variant X3, ncRNA [XR_342658]
A_44_P1122783	0.003950414	down	7.285454	-7.285454	-2.8650188
A_42_P661746	0.0031827332	up	7.2799873	7.2799873	2.863936	Slc25a30	PREDICTED: Rattus norvegicus solute carrier family 25, member 30 (Slc25a30), transcript variant X1, mRNA [XM_008770873]
A_44_P1108265	0.0010343526	down	7.237356	-7.237356	-2.8554628	Lca5	LCA5, lebercilin [Source:RGD Symbol;Acc:1308555] [ENSRNOT00000090139]
A_44_P1135432	0.0014891607	up	7.2324195	7.2324195	2.8544784	LOC102552414	PREDICTED: Rattus norvegicus uncharacterized LOC102552414 (LOC102552414), transcript variant X1, ncRNA [XR_595977]
A_44_P432965	0.002201583	down	7.1949344	-7.1949344	-2.8469815	Fdps	Rattus norvegicus farnesyl diphosphate synthase (Fdps), mRNA [NM_031840]
A_44_P1151559	1.6007852E-4	up	41456	2013-07-01	2.870128	LOC103694786	PREDICTED: Rattus norvegicus uncharacterized LOC103694786 (LOC103694786), ncRNA [XR_597967]
A_44_P835847	1.7828628E-4	up	7.095881	7.095881	2.8269818	C1qtnf3	Rattus norvegicus C1q and tumor necrosis factor related protein 3 (C1qtnf3), mRNA [NM_001134436]
A_64_P074127	0.0026448532	down	7.076625	-7.076625	-2.8230615	LOC685203	hypothetical protein LOC685203 [Source:RGD Symbol;Acc:1596493] [ENSRNOT00000059159]
A_43_P13041	0.027332637	down	7.0354	-7.0354	-2.8146324	Nr0b2	Rattus norvegicus nuclear receptor subfamily 0, group B, member 2 (Nr0b2), mRNA [NM_057133]
A_64_P101608	4.1130243E-4	down	7.024422	-7.024422	-2.8123796	Zfp354a	Rattus norvegicus zinc finger protein 354A (Zfp354a), mRNA [NM_052798]
A_44_P1140187	3.478049E-4	up	7.0157714	7.0157714	2.8106017	LOC102546397	PREDICTED: Rattus norvegicus uncharacterized LOC102546397 (LOC102546397), ncRNA [XR_343827]
A_64_P160072	0.010815113	up	6.972969	6.972969	2.801773	RGD1309651	PREDICTED: Rattus norvegicus similar to 1190005I06Rik protein (RGD1309651), mRNA [XM_001078912]
A_44_P765013	3.621534E-4	up	6.949586	6.949586	2.796927	Rnf186	Rattus norvegicus ring finger protein 186 (Rnf186), mRNA [NM_001109592]
A_44_P1115966	0.0018588183	down	6.938094	-6.938094	-2.7945395
A_42_P543004	0.004662951	up	6.918305	6.918305	2.7904186	Socs2	Rattus norvegicus suppressor of cytokine signaling 2 (Socs2), mRNA [NM_058208]
A_44_P354078	0.0036924295	down	6.789525	-6.789525	-2.7633107	Hist1h1a	Rattus norvegicus histone cluster 1 H1 family member a (Hist1h1a), mRNA [NM_001106113]
A_44_P522524	7.95324E-4	up	6.7308264	6.7308264	2.7507837	Nr4a2	Rattus norvegicus nuclear receptor subfamily 4, group A, member 2 (Nr4a2), mRNA [NM_019328]
A_44_P1099714	0.0038626464	up	6.7192993	6.7192993	2.7483108
A_44_P1132337	5.3392333E-4	down	6.6941485	-6.6941485	-2.7429006		KITH_RAT (P27158) Thymidine kinase, cytosolic (Fragment) , partial (83%) [TC622055]
A_44_P1137923	2.8957144E-4	up	6.6776714	6.6776714	2.739345	LOC102550566	PREDICTED: Rattus norvegicus uncharacterized LOC102550566 (LOC102550566), transcript variant X1, ncRNA [XR_596716]
A_44_P1108205	0.001933699	up	6.657628	6.657628	2.7350082	Nnmt	PREDICTED: Rattus norvegicus nicotinamide N-methyltransferase (Nnmt), transcript variant X1, mRNA [XM_008766195]
A_64_P016003	0.0021133272	up	6.6040063	6.6040063	2.7233415	St8sia1	Rattus norvegicus ST8 alpha-N-acetyl-neuraminide alpha-2,8-sialyltransferase 1 (St8sia1), mRNA [NM_012813]
A_64_P158940	1.0914166E-4	up	6.574105	6.574105	2.7167945	Wsb1	Rattus norvegicus WD repeat and SOCS box-containing 1 (Wsb1), transcript variant 1, mRNA [NM_001042561]
A_44_P1368235	0.019475397	down	18050	-6.4945	-2.6992185	Ube2c	Rattus norvegicus ubiquitin-conjugating enzyme E2C (Ube2c), mRNA [NM_001106542]
A_44_P1102643	0.0029485035	up	6.473574	6.473574	2.6945624
A_44_P295789	0.007739333	down	6.4472055	-6.4472055	-2.688674	Comp	Rattus norvegicus cartilage oligomeric matrix protein (Comp), mRNA [NM_012834]
A_64_P152825	8.352304E-4	down	6.4430475	-6.4430475	-2.6877432	Cav2	Rattus norvegicus caveolin 2 (Cav2), mRNA [NM_131914]
A_44_P674922	3.427541E-4	up	6.4402475	6.4402475	2.6871161		UI-R-C3-ts-c-06-0-UI.s1 UI-R-C3 Rattus norvegicus cDNA clone UI-R-C3-ts-c-06-0-UI 3', mRNA sequence [AI549155]
A_44_P1095164	8.633624E-4	up	6.4141846	6.4141846	2.6812658
A_64_P085013	0.020982353	up	6.4086185	6.4086185	2.6800134	Ksr2	kinase suppressor of ras 2 [Source:RGD Symbol;Acc:1562674] [ENSRNOT00000046190]
A_44_P885558	0.004242466	down	6.390857	-6.390857	-2.6760094		Q8R4C3_CRIGR (Q8R4C3) Csr1, partial (40%) [TC597670]
A_64_P161310	1.4995625E-4	up	6.3699975	6.3699975	2.6712928	Cbs
A_64_P052145	0.002380442	down	6.335408	-6.335408	-2.6634376	Fads2	Rattus norvegicus fatty acid desaturase 2 (Fads2), mRNA [NM_031344]
A_44_P976680	0.025289807	down	6.3348126	-6.3348126	-2.663302	Cenpw	Rattus norvegicus centromere protein W (Cenpw), mRNA [NM_001246319]
A_44_P1094534	0.026744358	up	6.28312	6.28312	2.6514812	LOC100365958	PREDICTED: Rattus norvegicus Rdh2 protein-like (LOC100365958), mRNA [XM_006226051]
A_44_P276097	0.0043968097	down	6.270608	-6.270608	-2.6486053	Lgsn	Rattus norvegicus lengsin, lens protein with glutamine synthetase domain (Lgsn), mRNA [NM_181383]
A_64_P050921	0.0076551684	up	6.207522	6.207522	2.6340175	Ablim3	Rattus norvegicus actin binding LIM protein family, member 3 (Ablim3), mRNA [NM_001191698]
A_44_P1083362	0.04051135	up	6.2016273	6.2016273	2.6326468	Maff	Rattus norvegicus MAF bZIP transcription factor F (Maff), mRNA [NM_001130573]
A_44_P287301	2.1938163E-4	down	6.160302	-6.160302	-2.623001	Bcl6	Rattus norvegicus B-cell CLL/lymphoma 6 (Bcl6), mRNA [NM_001107084]
A_44_P1092386	0.0015518796	up	6.147092	6.147092	2.619904	LOC102556539	PREDICTED: Rattus norvegicus uncharacterized LOC102556539 (LOC102556539), transcript variant X1, mRNA [XM_008775294]
A_43_P20126	0.0046741134	down	6.1400547	-6.1400547	-2.6182516	Cenph	centromere protein H [Source:RGD Symbol;Acc:1583506] [ENSRNOT00000025129]
A_44_P1139792	0.008318463	down	6.0670886	-6.0670886	-2.6010044	LOC102546393	PREDICTED: Rattus norvegicus uncharacterized LOC102546393 (LOC102546393), transcript variant X7, ncRNA [XR_001834737]
A_44_P365516	0.0012431663	down	6.032589	-6.032589	-2.5927773	Tsc22d1	Rattus norvegicus TSC22 domain family, member 1 (Tsc22d1), transcript variant 2, mRNA [NM_013043]
A_44_P1147031	8.2276994E-4	down	6.022357	-6.022357	-2.5903282	LOC102549628	PREDICTED: Rattus norvegicus uncharacterized LOC102549628 (LOC102549628), ncRNA [XR_594107]
A_44_P1144393	2.794511E-4	up	5.9941483	5.9941483	2.5835547	LOC102552888	PREDICTED: Rattus norvegicus uncharacterized LOC102552888 (LOC102552888), transcript variant X2, ncRNA [XR_001843226]
A_44_P1124658	0.0023165517	up	5.9511886	5.9511886	2.5731778	LOC103692251	PREDICTED: Rattus norvegicus uncharacterized LOC103692251 (LOC103692251), ncRNA [XR_592337]
A_44_P1144782	0.0015053117	up	5.9214945	5.9214945	2.5659614	LOC103692215	PREDICTED: Rattus norvegicus uncharacterized LOC103692215 (LOC103692215), ncRNA [XR_592258]
A_44_P1099849	1.3260035E-4	up	5.9170732	5.9170732	2.5648837	LOC690700	PREDICTED: Rattus norvegicus similar to similar to RIKEN cDNA 1700001E04 (LOC690700), mRNA [XM_008758229]
A_64_P161838	1.4046372E-4	down	5.915266	-5.915266	-2.564443	Snai2	Rattus norvegicus snail family transcriptional repressor 2 (Snai2), mRNA [NM_013035]
A_44_P1137445	0.0039773867	down	5.8745384	-5.8745384	-2.5544755	LOC108348491	PREDICTED: Rattus norvegicus uncharacterized LOC108348491 (LOC108348491), transcript variant X1, ncRNA [XR_001834125]
A_44_P746080	0.0056183203	down	5.788727	-5.788727	-2.533246	Angptl8	Rattus norvegicus angiopoietin-like 8 (Angptl8), mRNA [NM_001271710]
A_44_P1117436	0.013488128	down	5.7814445	-5.7814445	-2.53143	LOC103695000	PREDICTED: Rattus norvegicus uncharacterized LOC103695000 (LOC103695000), ncRNA [XR_598697]
A_44_P1152901	5.9737166E-4	up	5.780192	5.780192	2.5311174	RGD1309651	similar to 1190005I06Rik protein [Source:RGD Symbol;Acc:1309651] [ENSRNOT00000023721]
A_42_P708181	4.4073325E-4	down	5.7671213	-5.7671213	-2.5278513	Kntc1	Rattus norvegicus kinetochore associated 1 (Kntc1), mRNA [NM_001107140]
A_42_P811256	0.006553659	up	5.7270083	5.7270083	2.5177817	Vnn1	Rattus norvegicus vanin 1 (Vnn1), mRNA [NM_001025623]
A_44_P1162960	0.0012607547	up	5.717288	5.717288	2.515331	LOC102553656	PREDICTED: Rattus norvegicus serine/threonine-protein kinase greatwall-like (LOC102553656), mRNA [XM_006254368]
A_44_P1363023	0.027982742	up	5.7001295	5.7001295	2.5109947
A_64_P011197	2.1292486E-4	up	5.699131	5.699131	2.510742	Srrm3	Rattus norvegicus serine/arginine repetitive matrix 3 (Srrm3), mRNA [NM_001277394]
A_43_P23115	0.018978484	up	5.6918902	5.6918902	2.5089078	Inmt	Rattus norvegicus indolethylamine N-methyltransferase (Inmt), mRNA [NM_001109022]
A_44_P1163801	0.047162853	down	5.6741734	-5.6741734	-2.5044103	LOC102551949	PREDICTED: Rattus norvegicus uncharacterized LOC102551949 (LOC102551949), ncRNA [XR_358391]
A_44_P1084685	0.010915175	up	5.6479635	5.6479635	2.4977307	Ppm1k	Rattus norvegicus protein phosphatase, Mg2+/Mn2+ dependent, 1K (Ppm1k), mRNA [NM_001107863]
A_44_P651304	1.4880202E-4	up	5.6390734	5.6390734	2.4954581	LOC102553001	PREDICTED: Rattus norvegicus zinc finger protein 431-like (LOC102553001), transcript variant X1, mRNA [XM_008774363]
A_43_P17238	8.0202817E-4	up	5.637127	5.637127	2.49496	Rnd2	Rattus norvegicus Rho family GTPase 2 (Rnd2), mRNA [NM_001010953]
A_44_P424723	0.032975137	up	5.6288223	5.6288223	2.4928331	Sik1	salt-inducible kinase 1 [Source:RGD Symbol;Acc:69407] [ENSRNOT00000001579]
A_42_P589190	0.022428278	down	5.6103435	-5.6103435	-2.488089	Aacs	Rattus norvegicus acetoacetyl-CoA synthetase (Aacs), mRNA [NM_023104]
A_44_P1362693	0.0067257737	up	5.568698	5.568698	2.47734	Kcp	kielin/chordin-like protein [Source:RGD Symbol;Acc:1561119] [ENSRNOT00000050795]
A_44_P1083822	2.4969495E-4	down	5.5509186	-5.5509186	-2.4727266	Slc7a4	Rattus norvegicus solute carrier family 7, member 4 (Slc7a4), mRNA [NM_001107078]
A_44_P1102123	0.045132056	up	5.549541	5.549541	2.4723685
A_44_P1126839	0.0056281965	up	5.527977	5.527977	2.4667516	LOC102552151	PREDICTED: Rattus norvegicus uncharacterized LOC102552151 (LOC102552151), ncRNA [XR_593043]
A_44_P1162955	0.008853584	down	5.5247283	-5.5247283	-2.4659035	Mki67	Rattus norvegicus marker of proliferation Ki-67 (Mki67), mRNA [NM_001271366]
A_44_P1118793	0.012630484	up	5.5176597	5.5176597	2.4640565	LOC103691262	PREDICTED: Rattus norvegicus uncharacterized LOC103691262 (LOC103691262), ncRNA [XR_590538]
A_42_P490004	0.0028948172	up	5.4958115	5.4958115	2.4583325	Gpat3	glycerol-3-phosphate acyltransferase 3 [Source:RGD Symbol;Acc:1565703] [ENSRNOT00000002936]
A_44_P1133820	7.119776E-4	down	5.472979	-5.472979	-2.4523263	LOC100911239	PREDICTED: Rattus norvegicus uncharacterized LOC100911239 (LOC100911239), ncRNA [XR_339650]
A_43_P17239	6.185873E-4	up	5.4644837	5.4644837	2.4500852	Aig1	Rattus norvegicus androgen-induced 1 (Aig1), mRNA [NM_001134425]
A_44_P1128395	0.009075104	down	16923	-5.46	-2.448901
A_44_P1141656	0.014163338	up	5.451547	5.451547	2.4466658
A_44_P1124712	0.0016856147	down	5.4294944	-5.4294944	-2.4408178	LOC102553752	PREDICTED: Rattus norvegicus uncharacterized LOC102553752 (LOC102553752), transcript variant X1, ncRNA [XR_001837755]
A_44_P897781	1.946846E-4	down	5.416272	-5.416272	-2.4373002	Hsd17b7	hydroxysteroid (17-beta) dehydrogenase 7 [Source:RGD Symbol;Acc:2837] [ENSRNOT00000003812]
A_42_P817417	7.6502806E-4	up	5.392802	5.392802	2.431035	PVR	Rattus norvegicus poliovirus receptor (PVR), mRNA [NM_017076]
A_64_P096006	9.668154E-4	up	5.371719	5.371719	2.4253838	Xrra1	X-ray radiation resistance associated 1 [Source:RGD Symbol;Acc:1305502] [ENSRNOT00000031908]
A_43_P10008	0.0019851255	up	5.357766	5.357766	2.4216316	Aig1	Rattus norvegicus androgen-induced 1 (Aig1), mRNA [NM_001134425]
A_44_P1100494	1.7576037E-4	up	5.3439193	5.3439193	2.4178982	RGD1561667	PREDICTED: Rattus norvegicus similar to putative protein kinase (RGD1561667), transcript variant X1, mRNA [XM_008758801]
A_44_P1099345	0.03927689	up	5.3292704	5.3292704	2.413938
A_43_P11444	0.0018376136	down	5.328432	-5.328432	-2.413711	S100g	Rattus norvegicus S100 calcium binding protein G (S100g), mRNA [NM_012521]
A_44_P956005	0.0071631623	up	5.327857	5.327857	2.4135554	Slc25a30	PREDICTED: Rattus norvegicus solute carrier family 25, member 30 (Slc25a30), transcript variant X1, mRNA [XM_008770873]
A_64_P091148	4.547233E-4	up	5.309035	5.309035	2.4084496	Tuba3a	Rattus norvegicus tubulin, alpha 3A (Tuba3a), mRNA [NM_001040008]
A_44_P1103350	1.747274E-4	up	5.280535	5.280535	2.400684
A_44_P1121699	0.021658083	up	5.274161	5.274161	2.3989415	LOC102547849	PREDICTED: Rattus norvegicus uncharacterized LOC102547849 (LOC102547849), ncRNA [XR_591482]
A_44_P1131716	1.7677878E-4	up	5.240725	5.240725	2.3897665	LOC102547579	PREDICTED: Rattus norvegicus uncharacterized LOC102547579 (LOC102547579), ncRNA [XR_338700]
A_44_P512136	8.040359E-4	down	5.239415	-5.239415	-2.3894057	Dhcr7	Rattus norvegicus 7-dehydrocholesterol reductase (Dhcr7), mRNA [NM_022389]
A_44_P1105150	0.020436341	up	5.2288465	5.2288465	2.3864927		RATA1INH3Z Rattus norvegicus alpha-1 inhibitor III (alpha-1-I3) gene, exons 1-3 [M22993]
A_44_P944882	0.009733662	up	5.2204714	5.2204714	2.38418		AGENCOURT_17891062 NIH_MGC_238 Rattus norvegicus cDNA clone IMAGE:7132718 5', mRNA sequence [CK600836]
A_44_P1155202	0.036646206	down	5.21955	-5.21955	-2.3839254	Prr32	proline rich 32 [Source:RGD Symbol;Acc:1583341] [ENSRNOT00000074384]
A_44_P238204	0.002865905	down	5.158116	-5.158116	-2.3668442	Mid1ip1	Rattus norvegicus MID1 interacting protein 1 (Mid1ip1), mRNA [NM_206950]
A_44_P241885	6.4986316E-4	up	5.1445885	5.1445885	2.3630557	Ech1	Rattus norvegicus enoyl-CoA hydratase 1 (Ech1), mRNA [NM_022594]
A_44_P501142	0.0016972515	down	5.12198	-5.12198	-2.3567016	Srebf1	Rattus norvegicus sterol regulatory element binding transcription factor 1 (Srebf1), transcript variant 1, mRNA [NM_001276707]
A_44_P1114265	0.0013776411	up	5.101069	5.101069	2.3507996	Foxf2	PREDICTED: Rattus norvegicus forkhead box F2 (Foxf2), transcript variant X1, mRNA [XM_008771604]
A_44_P1363670	2.0452093E-4	up	5.085955	5.085955	2.3465188
A_44_P1127801	4.2931113E-4	up	5.0791926	5.0791926	2.3445992
A_44_P1114628	0.018829655	down	5.057633	-5.057633	-2.3384624	LOC102557434	PREDICTED: Rattus norvegicus zinc finger protein 160-like (LOC102557434), partial mRNA [XM_006227165]
A_44_P1134116	0.014822089	down	5.0527225	-5.0527225	-2.337061	LOC102550495	PREDICTED: Rattus norvegicus uncharacterized LOC102550495 (LOC102550495), ncRNA [XR_339788]
A_44_P975779	0.009536324	up	5.038817	5.038817	2.333085	Ppm1k	PREDICTED: Rattus norvegicus protein phosphatase, Mg2+/Mn2+ dependent, 1K (Ppm1k), transcript variant X3, mRNA [XM_006236571]
A_42_P555131	4.487405E-4	down	5.035735	-5.035735	-2.3322024	Tmbim7	Rattus norvegicus similar to RIKEN cDNA 4930500J03 (RGD1306626), mRNA [NM_001039612]
A_44_P697832	0.0128746675	down	5.0310736	-5.0310736	-2.3308663	Fam228b	PREDICTED: Rattus norvegicus family with sequence similarity 228, member B (Fam228b), transcript variant X5, mRNA [XM_008764561]
A_44_P1154137	0.0024757218	down	5.030807	-5.030807	-2.3307898		similar to RIKEN cDNA 5830475I06 [Source:RGD Symbol;Acc:1311744] [ENSRNOT00000036054]
A_44_P618725	0.005401159	up	4.9981213	4.9981213	2.3213859		UI-R-AE1-zj-h-05-0-UI.s10 UI-R-AE1 Rattus norvegicus cDNA clone UI-R-AE1-zj-h-05-0-UI 3', mRNA sequence [CK839132]
A_64_P151889	4.3345863E-4	up	4.9877806	4.9877806	2.318398		Rattus norvegicus similar to carnitine acetyltransferase (LOC298010), mRNA [XM_232928]
A_44_P477555	0.008770011	down	4.9873724	-4.9873724	-2.31828	Pclaf	Rattus norvegicus PCNA clamp associated factor (Pclaf), mRNA [NM_201418]
A_44_P1087766	0.036841083	down	4.986277	-4.986277	-2.3179631	RGD1560860	Rattus norvegicus similar to ankyrin repeat domain 26 (RGD1560860), mRNA [NM_001170421]
A_44_P1152640	0.03932282	down	4.964236	-4.964236	-2.3115716		polycystic kidney disease 1-like 2 [Source:RGD Symbol;Acc:1588631] [ENSRNOT00000071130]
A_64_P010494	2.2880199E-4	up	4.9623623	4.9623623	2.311027	Olr1736	Rattus norvegicus olfactory receptor 1736 (Olr1736), mRNA [NM_001001421]
A_44_P1161670	0.020615969	up	4.955262	4.955262	2.3089614
A_64_P083888	5.3173525E-4	down	4.950371	-4.950371	-2.3075366	Tm7sf2	Rattus norvegicus transmembrane 7 superfamily member 2 (Tm7sf2), mRNA [NM_001013071]
A_44_P1147803	5.376156E-4	down	4.949718	-4.949718	-2.3073463
A_64_P163718	0.010087693	up	4.9491277	4.9491277	2.3071742	Slc25a30	Rattus norvegicus solute carrier family 25, member 30 (Slc25a30), mRNA [NM_001013187]
A_44_P1147422	0.001584907	up	4.9439907	4.9439907	2.305676
A_44_P1081420	0.013885107	down	4.943895	-4.943895	-2.305648	Rprm	Rattus norvegicus reprimo, TP53 dependent G2 arrest mediator candidate (Rprm), mRNA [NM_001044276]
A_42_P666200	0.008261154	down	4.9306874	-4.9306874	-2.3017888	Mcm5	minichromosome maintenance complex component 5 [Source:RGD Symbol;Acc:1306616] [ENSRNOT00000084271]
A_43_P13508	0.010724587	up	4.914447	4.914447	2.297029	Arl5b	Rattus norvegicus ADP-ribosylation factor like GTPase 5B (Arl5b), mRNA [NM_001015031]
A_44_P758422	6.970323E-4	up	4.910586	4.910586	2.295895		FQ145814 Rattus norvegicus spleen Sprague-Dawley Rattus norvegicus cDNA clone TL0AEA100YK21 5', mRNA sequence [FQ145814]
A_43_P10824	0.013539349	up	4.9098682	4.9098682	2.2956843	Cib2	Rattus norvegicus calcium and integrin binding family member 2 (Cib2), mRNA [NM_001015010]
A_44_P1141105	0.039371233	up	4.899675	4.899675	2.292686
A_64_P140936	4.5806365E-4	down	4.8891025	-4.8891025	-2.2895696	Zfp39	Rattus norvegicus zinc finger protein 39 (Zfp39), mRNA [NM_001107004]
A_44_P1149756	5.629672E-4	down	4.880391	-4.880391	-2.2869968	LOC102553540	PREDICTED: Rattus norvegicus uncharacterized LOC102553540 (LOC102553540), transcript variant X1, ncRNA [XR_360532]
A_44_P1122438	0.0011165196	up	4.8720655	4.8720655	2.2845335
A_64_P006285	6.715089E-4	up	4.8707147	4.8707147	2.2841334	Lhx1	Rattus norvegicus LIM homeobox 1 (Lhx1), mRNA [NM_145880]
A_44_P1151692	0.012813799	down	4.867558	-4.867558	-2.283198	Il17rb	interleukin 17 receptor B [Source:RGD Symbol;Acc:1311392] [ENSRNOT00000072778]
A_44_P1111091	0.001225146	up	4.8519197	4.8519197	2.2785556	Acap2	PREDICTED: Rattus norvegicus ArfGAP with coiled-coil, ankyrin repeat and PH domains 2 (Acap2), transcript variant X1, mRNA [XM_017598065]
A_44_P1089041	0.021788213	up	4.8512383	4.8512383	2.278353	Vom2r70	Rattus norvegicus vomeronasal 2 receptor, 70 (Vom2r70), mRNA [NM_001099477]
A_44_P178448	0.0010836037	down	4.8422136	-4.8422136	-2.2756667	Srebf1	Rattus norvegicus sterol regulatory element binding transcription factor 1 (Srebf1), transcript variant 1, mRNA [NM_001276707]
A_44_P1370604	0.0059368503	up	4.8372645	4.8372645	2.2741914		Rattus norvegicus similar to Y-LINKED TESTIS-SPECIFIC PROTEIN (LOC291480), mRNA [XM_225800]
A_43_P14977	5.046099E-4	down	4.828768	-4.828768	-2.271655	Tsc22d1	Rattus norvegicus TSC22 domain family, member 1 (Tsc22d1), transcript variant 1, mRNA [NM_001109912]
A_64_P121871	6.2327686E-4	down	4.818042	-4.818042	-2.268447	Pklr	Rattus norvegicus pyruvate kinase, liver and RBC (Pklr), mRNA [NM_012624]
A_44_P1139227	5.632355E-4	down	4.7878213	-4.7878213	-2.2593694	LOC102556364	PREDICTED: Rattus norvegicus uncharacterized LOC102556364 (LOC102556364), transcript variant X1, ncRNA [XR_597112]
A_64_P231828	9.041691E-4	down	4.766172	-4.766172	-2.252831	Acaca	Rattus norvegicus acetyl-CoA carboxylase alpha (Acaca), mRNA [NM_022193]
A_44_P357870	2.4388358E-4	up	4.7638125	4.7638125	2.2521167	Cpt1a	Rattus norvegicus carnitine palmitoyltransferase 1A (Cpt1a), mRNA [NM_031559]
A_64_P089255	3.5376698E-4	up	4.7611604	4.7611604	2.2513132	Ms4a10	Rattus norvegicus membrane spanning 4-domains A10 (Ms4a10), mRNA [NM_001106336]
A_64_P022402	2.998442E-4	down	4.760295	-4.760295	-2.251051	LOC689770	Rattus norvegicus similar to osteoclast inhibitory lectin (LOC689770), mRNA [NM_001142304]
A_44_P1093336	5.3866993E-4	up	4.751868	4.751868	2.2484946	Tas2r145	PREDICTED: Rattus norvegicus taste receptor, type 2, member 145 (Tas2r145), mRNA [XM_002729413]
A_44_P1135452	0.048923783	up	4.744443	4.744443	2.2462387	LOC102553796	PREDICTED: Rattus norvegicus uncharacterized LOC102553796 (LOC102553796), ncRNA [XR_340473]
A_64_P246679	0.0020374083	down	4.7436223	-4.7436223	-2.245989	Rabif	Rattus norvegicus RAB interacting factor (Rabif), mRNA [NM_001007678]
A_44_P1119413	0.012172502	down	4.737658	-4.737658	-2.244174	LOC102546765	PREDICTED: Rattus norvegicus uncharacterized LOC102546765 (LOC102546765), transcript variant X3, ncRNA [XR_343620]
A_44_P1112996	0.001623236	up	4.7333536	4.7333536	2.2428627	Egfr	PREDICTED: Rattus norvegicus epidermal growth factor receptor (Egfr), transcript variant X3, mRNA [XM_008770418]
A_44_P732273	0.021855408	up	4.706641	4.706641	2.2346978
A_44_P1083932	0.0031916	up	4.703956	4.703956	2.2338746	Slc22a22	Rattus norvegicus solute carrier family 22 (organic cation transporter), member 22 (Slc22a22), mRNA [NM_001013947]
A_44_P1042711	0.012424471	down	4.690433	-4.690433	-2.229721	Kif20a	Rattus norvegicus kinesin family member 20A (Kif20a), mRNA [NM_001108426]
A_44_P1145072	0.004162279	down	4.683235	-4.683235	-2.2275054	LOC102555188	PREDICTED: Rattus norvegicus uncharacterized LOC102555188 (LOC102555188), ncRNA [XR_354013]
A_44_P1101730	0.009159422	down	4.683213	-4.683213	-2.2274988	Cdca5	PREDICTED: Rattus norvegicus cell division cycle associated 5 (Cdca5), transcript variant X1, mRNA [XM_008760176]
A_44_P1128182	9.909801E-4	up	4.6790166	4.6790166	2.2262053	LOC102547508	PREDICTED: Rattus norvegicus uncharacterized LOC102547508 (LOC102547508), transcript variant X1, ncRNA [XR_593482]
A_43_P21980	0.030407326	up	4.676209	4.676209	2.2253394	Gnat2	Rattus norvegicus G protein subunit alpha transducin 2 (Gnat2), mRNA [NM_001108950]
A_44_P471541	0.030850967	down	4.667425	-4.667425	-2.222627	Inhbe	inhibin beta E subunit [Source:RGD Symbol;Acc:621196] [ENSRNOT00000010106]
A_64_P151254	0.010570443	down	4.663745	-4.663745	-2.221489	Lrtomt	Rattus norvegicus leucine rich transmembrane and O-methyltransferase domain containing (Lrtomt), mRNA [NM_001139494]
A_44_P1161865	0.013049251	up	4.6481624	4.6481624	2.2166605
A_44_P899255	0.0031345114	up	4.630737	4.630737	2.2112417	Ppm1k	PREDICTED: Rattus norvegicus protein phosphatase, Mg2+/Mn2+ dependent, 1K (Ppm1k), transcript variant X3, mRNA [XM_006236571]
A_44_P1150603	2.4474642E-4	up	4.626395	4.626395	2.2098885
A_64_P102381	0.0418448	up	4.6240797	4.6240797	2.2091663	Wfdc11	Rattus norvegicus WAP four-disulfide core domain 11 (Wfdc11), mRNA [NM_001253677]
A_42_P506273	0.01145725	down	4.623061	-4.623061	-2.2088485	Csad	Rattus norvegicus cysteine sulfinic acid decarboxylase (Csad), transcript variant 1, mRNA [NM_021750]
A_64_P094076	0.0035696456	up	4.622803	4.622803	2.208768	Olr312	Rattus norvegicus olfactory receptor 312 (Olr312), mRNA [NM_001000764]
A_42_P797218	0.0012533261	up	4.619922	4.619922	2.2078686	Gpt	Rattus norvegicus glutamic--pyruvic transaminase (Gpt), mRNA [NM_031039]
A_44_P422836	0.031419836	up	4.592368	4.592368	2.1992383	Igfbp1	Rattus norvegicus insulin-like growth factor binding protein 1 (Igfbp1), mRNA [NM_013144]
A_44_P1131258	0.0011589655	up	4.5874944	4.5874944	2.1977065	LOC103693292	PREDICTED: Rattus norvegicus uncharacterized LOC103693292 (LOC103693292), transcript variant X2, ncRNA [XR_594623]
A_42_P523070	0.0026499873	down	4.562606	-4.562606	-2.189858	Kif18b	Rattus norvegicus kinesin family member 18B (Kif18b), mRNA [NM_001039019]
A_44_P1045734	0.02429323	down	4.5603456	-4.5603456	-2.1891432	Stac3	Rattus norvegicus SH3 and cysteine rich domain 3 (Stac3), mRNA [NM_001130558]
A_44_P1019604	0.027238274	down	4.555214	-4.555214	-2.1875188	Ube2c	Rattus norvegicus ubiquitin-conjugating enzyme E2C (Ube2c), mRNA [NM_001106542]
A_44_P464572	0.009645817	down	4.5208454	-4.5208454	-2.1765926		UI-R-A0-aq-f-04-0-UI.s1 UI-R-A0 Rattus norvegicus cDNA clone UI-R-A0-aq-f-04-0-UI 3' similar to gi [AA819794]
A_44_P1081054	0.009397813	up	4.518493	4.518493	2.1758418	St8sia1	Rattus norvegicus ST8 alpha-N-acetyl-neuraminide alpha-2,8-sialyltransferase 1 (St8sia1), mRNA [NM_012813]
A_44_P1088951	0.03349307	down	4.498195	-4.498195	-2.1693463	Nek2	Rattus norvegicus NIMA-related kinase 2 (Nek2), mRNA [NM_053691]
A_44_P1095153	0.0010717845	up	4.4960995	4.4960995	2.168674	Gask1a	PREDICTED: Rattus norvegicus family with sequence similarity 198, member A (Fam198a), mRNA [XM_001078210]
A_44_P548420	0.0013450667	down	4.485296	-4.485296	-2.165203	Pmvk	Rattus norvegicus phosphomevalonate kinase (Pmvk), mRNA [NM_001008352]
A_42_P677231	0.044396915	up	4.469713	4.469713	2.1601822	LOC103693584	PREDICTED: Rattus norvegicus uncharacterized LOC103693584 (LOC103693584), transcript variant X1, ncRNA [XR_595091]
A_44_P1094404	0.048739403	down	4.4650407	-4.4650407	-2.1586733	LOC100365212	PREDICTED: Rattus norvegicus hypothetical protein LOC100365212 (LOC100365212), transcript variant X1, mRNA [XM_002726867]
A_44_P590086	5.7860534E-4	down	4.4530396	-4.4530396	-2.1547904		FM100783 etnofat Rattus norvegicus cDNA clone etnofatP0057O21 5', mRNA sequence [FM100783]
A_44_P1130138	0.002123175	up	4.4494576	4.4494576	2.1536295	LOC102549350	PREDICTED: Rattus norvegicus uncharacterized LOC102549350 (LOC102549350), transcript variant X1, ncRNA [XR_589157]
A_42_P545368	3.9259775E-4	up	4.4460335	4.4460335	2.1525187	Slc16a6	PREDICTED: Rattus norvegicus solute carrier family 16, member 6 (Slc16a6), transcript variant X4, mRNA [XM_017597350]
A_43_P17424	0.009430995	down	4.443901	-4.443901	-2.1518266	Chaf1b	Rattus norvegicus chromatin assembly factor 1 subunit B (Chaf1b), mRNA [NM_001024741]
A_44_P1118372	0.0334466	up	4.4171996	4.4171996	2.143132	LOC103691200	PREDICTED: Rattus norvegicus uncharacterized LOC103691200 (LOC103691200), transcript variant X2, ncRNA [XR_001834585]
A_44_P1117381	7.1248045E-4	down	4.408836	-4.408836	-2.1403978
A_64_P040860	3.6147176E-4	up	4.4048157	4.4048157	2.1390817		uncharacterized LOC102550314 [Source:RGD Symbol;Acc:7600849] [ENSRNOT00000074473]
A_44_P1118212	0.0020620301	up	4.3959956	4.3959956	2.13619	LOC102553864	PREDICTED: Rattus norvegicus uncharacterized LOC102553864 (LOC102553864), ncRNA [XR_350525]
A_64_P096459	2.8629607E-4	up	4.3935213	4.3935213	2.1353776	Fbp2	Rattus norvegicus fructose-bisphosphatase 2 (Fbp2), mRNA [NM_053716]
A_64_P086689	0.0021616453	up	4.3899803	4.3899803	2.1342144	Asl	Rattus norvegicus argininosuccinate lyase (Asl), mRNA [NM_021577]
A_44_P1150851	0.003368818	down	4.386253	-4.386253	-2.132989	Lss	lanosterol synthase (2,3-oxidosqualene-lanosterol cyclase) [Source:RGD Symbol;Acc:620955] [ENSRNOT00000078412]
A_44_P556989	0.012554692	up	4.378443	4.378443	2.1304178	Ngfr	Rattus norvegicus nerve growth factor receptor (Ngfr), mRNA [NM_012610]
A_64_P089728	3.2955286E-4	up	4.3781133	4.3781133	2.1303093	Nol6	nucleolar protein 6 [Source:RGD Symbol;Acc:1308033] [ENSRNOT00000076185]
A_44_P407259	0.0010843192	down	4.369005	-4.369005	-2.1273048	Usp2	Rattus norvegicus ubiquitin specific peptidase 2 (Usp2), mRNA [NM_053774]
A_64_P104881	0.0012346965	down	4.3658676	-4.3658676	-2.1262684	Tlcd2	TLC domain containing 2 [Source:RGD Symbol;Acc:1562631] [ENSRNOT00000056355]
A_64_P022155	0.0022711363	down	4.3649025	-4.3649025	-2.1259494	Slc2a5	Rattus norvegicus solute carrier family 2 member 5 (Slc2a5), mRNA [NM_031741]
A_44_P1082474	0.00459128	up	4.3514814	4.3514814	2.1215067	Fam46b	Rattus norvegicus family with sequence similarity 46, member B (Fam46b), mRNA [NM_001107907]
A_44_P1153499	0.0066459486	down	4.3458652	-4.3458652	-2.1196434	Spc24	SPC24, NDC80 kinetochore complex component [Source:RGD Symbol;Acc:1307631] [ENSRNOT00000045384]
A_64_P123078	0.0074192313	down	4.3437047	-4.3437047	-2.118926	Phgdh	Rattus norvegicus phosphoglycerate dehydrogenase (Phgdh), mRNA [NM_031620]
A_64_P083474	0.015718697	up	4.338752	4.338752	2.11728	Ttc9	Rattus norvegicus tetratricopeptide repeat domain 9 (Ttc9), mRNA [NM_001134731]
A_44_P409232	0.0015645667	up	4.3213215	4.3213215	2.1114726	Cyp2e1	Rattus norvegicus cytochrome P450, family 2, subfamily e, polypeptide 1 (Cyp2e1), mRNA [NM_031543]
A_44_P652021	0.0020114065	down	4.3209453	-4.3209453	-2.111347
A_42_P602724	9.7485865E-4	down	4.3150306	-4.3150306	-2.1093707	Ubd	Rattus norvegicus ubiquitin D (Ubd), mRNA [NM_053299]
A_44_P267117	0.001760196	down	4.3095865	-4.3095865	-2.1075494	Gale	Rattus norvegicus UDP-galactose-4-epimerase (Gale), mRNA [NM_080783]
A_64_P046373	0.002903859	down	4.3035827	-4.3035827	-2.1055381	Pycr1	PREDICTED: Rattus norvegicus pyrroline-5-carboxylate reductase 1 (Pycr1), transcript variant X1, mRNA [XM_008768473]
A_44_P1364879	0.008988349	down	4.303502	-4.303502	-2.1055112	Cgn	cingulin [Source:RGD Symbol;Acc:1311992] [ENSRNOT00000028440]
A_43_P11484	0.0039049236	down	4.287168	-4.287168	-2.100025	Mme	Rattus norvegicus membrane metallo-endopeptidase (Mme), mRNA [NM_012608]
A_44_P388973	5.302354E-4	up	4.286497	4.286497	2.0997992	Got1	Rattus norvegicus glutamic-oxaloacetic transaminase 1 (Got1), mRNA [NM_012571]
A_64_P106021	0.026203437	up	4.2740355	4.2740355	2.095599	Trpm6	transient receptor potential cation channel, subfamily M, member 6 [Source:RGD Symbol;Acc:1309942] [ENSRNOT00000017892]
A_44_P1124356	0.011164426	up	4.269688	4.269688	2.0941308
A_43_P18346	0.03908093	up	4.265937	4.265937	2.0928626	Surf6	Rattus norvegicus surfeit 6 (Surf6), mRNA [NM_001015014]
A_44_P1154960	0.010402776	up	4.265851	4.265851	2.0928335		vomeronasal 2 receptor, 3 [Source:RGD Symbol;Acc:1565892] [ENSRNOT00000044669]
A_43_P14040	0.0068117906	down	4.244674	-4.244674	-2.0856538	Sgk2	Rattus norvegicus serum/glucocorticoid regulated kinase 2 (Sgk2), mRNA [NM_134463]
A_44_P1150590	0.0062458655	up	4.2441816	4.2441816	2.0854864	LOC108353207	PREDICTED: Rattus norvegicus uncharacterized LOC108353207 (LOC108353207), ncRNA [XR_001842378]
A_44_P1084375	3.1993975E-4	up	4.2434425	4.2434425	2.085235	Eya4	Rattus norvegicus EYA transcriptional coactivator and phosphatase 4 (Eya4), mRNA [NM_001271317]
A_64_P111310	0.0023970436	up	4.2364974	4.2364974	2.082872	Olr1687	Rattus norvegicus olfactory receptor 1687 (Olr1687), mRNA [NM_001000508]
A_44_P1115597	0.001092581	down	4.2319074	-4.2319074	-2.0813081	LOC102546589	PREDICTED: Rattus norvegicus uncharacterized LOC102546589 (LOC102546589), transcript variant X1, mRNA [XM_006255817]
A_44_P1154965	0.016425166	down	4.227864	-4.227864	-2.0799289	Slc13a4	PREDICTED: Rattus norvegicus solute carrier family 13 member 4 (Slc13a4), transcript variant X1, mRNA [XM_006236283]
A_44_P567198	3.2327214E-4	up	4.224953	4.224953	2.0789354		AMGNNUC:URRG1-00150-F9-A urrg1 (14046) Rattus norvegicus cDNA clone urrg1-00150-f9 5', mRNA sequence [CB750248]
A_44_P723176	0.0040500313	up	4.2197623	4.2197623	2.0771618		UI-R-CN1-cjg-p-11-0-UI.s1 UI-R-CN1 Rattus norvegicus cDNA clone UI-R-CN1-cjg-p-11-0-UI 3', mRNA sequence [BM386686]
A_44_P1117731	0.0029405735	up	4.2172847	4.2172847	2.0763144
A_64_P084851	0.014099743	up	4.208511	4.208511	2.07331	Rcan2	regulator of calcineurin 2 [Source:RGD Symbol;Acc:69198] [ENSRNOT00000029593]
A_44_P134993	0.0028956342	up	4.2057176	4.2057176	2.072352	Agxt	Rattus norvegicus alanine-glyoxylate aminotransferase (Agxt), transcript variant 1, mRNA [NM_030656]
A_44_P880842	3.2658398E-4	down	4.1785774	-4.1785774	-2.063012		FQ079952 Rattus norvegicus brain Sprague-Dawley Rattus norvegicus cDNA 3', mRNA sequence [FQ079952]
A_44_P1115891	0.0027383135	up	4.1739883	4.1739883	2.0614266	Slc16a10	PREDICTED: Rattus norvegicus solute carrier family 16 member 10 (Slc16a10), transcript variant X1, mRNA [XM_008772974]
A_42_P843603	0.0010173727	down	4.1698093	-4.1698093	-2.0599813	Tk1	Rattus norvegicus thymidine kinase 1 (Tk1), mRNA [NM_052800]
A_44_P1135293	0.0048790164	up	4.1664023	4.1664023	2.0588021
A_44_P1098505	0.0049700392	up	4.1659594	4.1659594	2.0586488
A_44_P1102358	0.009594674	down	4.165082	-4.165082	-2.0583448	Agxt2	PREDICTED: Rattus norvegicus alanine-glyoxylate aminotransferase 2 (Agxt2), transcript variant X1, mRNA [XM_006232069]
A_44_P1121885	3.929066E-4	up	4.164423	4.164423	2.0581167	LOC103691815	PREDICTED: Rattus norvegicus uncharacterized LOC103691815 (LOC103691815), ncRNA [XR_001837128]
A_42_P792817	0.04468154	down	4.1613913	-4.1613913	-2.057066	Me1	Rattus norvegicus malic enzyme 1, NADP(+)-dependent, cytosolic (Me1), mRNA [NM_012600]
A_44_P1132762	0.0048446273	up	4.1531725	4.1531725	2.0542138	LOC103693555	PREDICTED: Rattus norvegicus uncharacterized LOC103693555 (LOC103693555), ncRNA [XR_595053]
A_44_P1162885	5.251936E-4	down	4.1499124	-4.1499124	-2.0530808
A_44_P608167	0.0014171522	up	4.135892	4.135892	2.0481985	Tmem116	Rattus norvegicus transmembrane protein 116 (Tmem116), mRNA [NM_001159625]
A_64_P122624	0.0068854247	up	4.1339517	4.1339517	2.0475216	Sphkap	Rattus norvegicus SPHK1 interactor, AKAP domain containing (Sphkap), mRNA [NM_001127492]
A_44_P1093990	0.007855142	up	4.130301	4.130301	2.046247	Tcf23	transcription factor 23 [Source:RGD Symbol;Acc:1586500] [ENSRNOT00000009090]
A_44_P1127776	0.001791735	down	4.1154003	-4.1154003	-2.0410328	LOC102554269	PREDICTED: Rattus norvegicus uncharacterized LOC102554269 (LOC102554269), transcript variant X1, ncRNA [XR_001838802]
A_44_P1155610	0.017607696	down	4.1152344	-4.1152344	-2.0409746	Ccnb2	Rattus norvegicus cyclin B2 (Ccnb2), mRNA [NM_001009470]
A_64_P046268	0.0035418444	up	4.1150937	4.1150937	2.0409253	Cish	Rattus norvegicus cytokine inducible SH2-containing protein (Cish), mRNA [NM_031804]
A_44_P1141141	0.0011275845	up	4.1094375	4.1094375	2.038941	LOC108353213	PREDICTED: Rattus norvegicus uncharacterized LOC108353213 (LOC108353213), transcript variant X1, ncRNA [XR_001842386]
A_44_P1164141	0.0050381743	up	4.1062584	4.1062584	2.0378244	Lmo7
A_44_P1366033	0.001484907	up	4.0877495	4.0877495	2.0313067
A_44_P1099971	0.0040452257	up	4.0866327	4.0866327	2.0309126	LOC108348236	PREDICTED: Rattus norvegicus dorsal root ganglia homeobox protein-like (LOC108348236), mRNA [XM_017601840]
A_44_P1139697	0.009126226	up	4.0829577	4.0829577	2.0296147	LOC103694351	PREDICTED: Rattus norvegicus uncharacterized LOC103694351 (LOC103694351), ncRNA [XR_001834711]
A_44_P463313	0.017547876	down	4.082544	-4.082544	-2.0294683	Plk1	Rattus norvegicus polo-like kinase 1 (Plk1), mRNA [NM_017100]
A_44_P168280	0.00972077	down	4.080471	-4.080471	-2.0287356		M2 pyruvate kinase-like [Source:RGD Symbol;Acc:2321795] [ENSRNOT00000039144]
A_44_P1128844	4.8658793E-4	up	4.0791507	4.0791507	2.0282688	LOC102546778	PREDICTED: Rattus norvegicus uncharacterized LOC102546778 (LOC102546778), transcript variant X1, ncRNA [XR_362546]
A_44_P315661	3.7688145E-4	down	4.0759625	-4.0759625	-2.0271409	Hmgcr	Rattus norvegicus 3-hydroxy-3-methylglutaryl-CoA reductase (Hmgcr), mRNA [NM_013134]
A_44_P817696	0.004494656	down	4.0743456	-4.0743456	-2.0265684	Echdc1	Rattus norvegicus ethylmalonyl-CoA decarboxylase 1 (Echdc1), mRNA [NM_001007734]
A_44_P233080	0.019085009	down	4.0707645	-4.0707645	-2.0252998	Egr1	early growth response 1 [Source:RGD Symbol;Acc:2544] [ENSRNOT00000026303]
A_64_P117901	0.0072249207	up	4.0639644	4.0639644	2.0228877	Trib3	Rattus norvegicus tribbles pseudokinase 3 (Trib3), mRNA [NM_144755]
A_44_P1088736	0.0012501524	down	4.0636377	-4.0636377	-2.0227718	Hsd17b7	Rattus norvegicus hydroxysteroid (17-beta) dehydrogenase 7 (Hsd17b7), mRNA [NM_017235]
A_64_P022452	4.2053807E-4	up	4.063096	4.063096	2.0225794	Pebp4	PREDICTED: Rattus norvegicus phosphatidylethanolamine binding protein 4 (Pebp4), transcript variant X3, partial mRNA [XM_008769892]
A_44_P1145952	0.014453385	up	4.055801	4.055801	2.0199869	LOC103692748	PREDICTED: Rattus norvegicus uncharacterized LOC103692748 (LOC103692748), ncRNA [XR_593230]
A_44_P1365609	0.00115875	up	4.0544667	4.0544667	2.0195122	LOC310926	Rattus norvegicus hypothetical protein LOC310926 (LOC310926), mRNA [NM_001025002]
A_44_P1366256	0.004397172	up	4.0523367	4.0523367	2.018754		Rattus norvegicus, 25 clones, strain BN/SsNHsdMCW RNOR03324548, whole genome shotgun sequence [AABR03130075]
A_44_P278701	8.6453365E-4	down	4.0502257	-4.0502257	-2.0180023	Pklr	Rattus norvegicus pyruvate kinase, liver and RBC (Pklr), mRNA [NM_012624]
A_42_P576823	0.033015653	down	4.0489144	-4.0489144	-2.0175352	Mki67	Rattus norvegicus marker of proliferation Ki-67 (Mki67), mRNA [NM_001271366]
A_44_P1159442	0.0033885017	down	4.037063	-4.037063	-2.0133061	Pgd	Rattus norvegicus phosphogluconate dehydrogenase (Pgd), mRNA [NM_001305435]
A_64_P151071	0.0012152349	down	4.0360518	-4.0360518	-2.0129447	Hmgcs1	Rattus norvegicus 3-hydroxy-3-methylglutaryl-CoA synthase 1 (Hmgcs1), mRNA [NM_017268]
A_44_P1141138	9.807401E-4	up	4.0336285	4.0336285	2.0120783	LOC300308	Rattus norvegicus similar to hypothetical protein 4930509O22 (LOC300308), mRNA [NM_001013952]
A_44_P1137472	0.001589514	up	4.0309653	4.0309653	2.0111253
A_44_P916583	6.241836E-4	up	4.0260873	4.0260873	2.0093784		AMGNNUC:NRHY5-00406-E4-A W Rat hypothalamus (10471) Rattus norvegicus cDNA clone nrhy5-00406-e4 5', mRNA sequence [CB614494]
A_44_P1110936	0.011522893	up	4.0174	4.0174	2.006262	Spice1	PREDICTED: Rattus norvegicus spindle and centriole associated protein 1 (Spice1), transcript variant X4, mRNA [XM_008768721]
A_64_P036685	0.00915059	up	4.013161	4.013161	2.004739	Dmbx1	Rattus norvegicus diencephalon/mesencephalon homeobox 1 (Dmbx1), mRNA [NM_001107961]
A_44_P1155863	0.020727571	up	4.0118256	4.0118256	2.0042589		hypothetical LOC100361595 [Source:RGD Symbol;Acc:2319874] [ENSRNOT00000068166]
A_44_P1160893	0.034981627	up	4.011129	4.011129	2.0040083	Olr1701	Rattus norvegicus olfactory receptor 1701 (Olr1701), mRNA [NM_001001114]
A_44_P1114880	0.0012931604	up	4.010944	4.010944	2.0039418	Ablim3	PREDICTED: Rattus norvegicus actin binding LIM protein family, member 3 (Ablim3), transcript variant X2, mRNA [XM_017600951]
A_44_P570446	0.0070999106	up	4.009301	4.009301	2.0033507		CR475266 Rat pBluescript Lion Rattus norvegicus cDNA clone LIONp463H04130 3', mRNA sequence [CR475266]
A_44_P1084081	0.0017941715	up	4.006568	4.006568	2.002367	Wnt3	Rattus norvegicus wingless-type MMTV integration site family, member 3 (Wnt3), mRNA [NM_001105715]
A_44_P1103440	8.3930366E-4	up	4.0062985	4.0062985	2.00227	Kynu	PREDICTED: Rattus norvegicus kynureninase (Kynu), transcript variant X2, mRNA [XM_008761695]
A_44_P1160395	0.0065089925	up	3.982268	3.982268	1.9935904
A_44_P1117249	0.013182318	up	3.9742389	3.9742389	1.9906785	LOC100912653	PREDICTED: Rattus norvegicus uncharacterized LOC100912653 (LOC100912653), mRNA [XM_008758193]
A_64_P004993	0.0048065945	up	3.9739683	3.9739683	1.9905803	RGD1563888	Rattus norvegicus similar to DNA segment, Chr 16, ERATO Doi 472, expressed (RGD1563888), mRNA [NM_001108312]
A_42_P599116	0.0015775274	up	3.9727728	3.9727728	1.9901463	Phldb3	Rattus norvegicus pleckstrin homology-like domain, family B, member 3 (Phldb3), mRNA [NM_001191622]
A_44_P143922	0.00220881	down	3.9703178	-3.9703178	-1.9892545	Hes6	Rattus norvegicus hes family bHLH transcription factor 6 (Hes6), mRNA [NM_001013179]
A_44_P1161640	0.0046771285	down	3.963987	-3.963987	-1.9869523		Rattus norvegicus similar to ENSANGP00000004655 (LOC306370), mRNA [XM_224754]
A_44_P1083668	0.014725132	down	3.9639459	-3.9639459	-1.9869373	Psat1	Rattus norvegicus phosphoserine aminotransferase 1 (Psat1), mRNA [NM_198738]
A_44_P1096452	0.0025003122	up	3.9568021	3.9568021	1.984335	LOC103690779	PREDICTED: Rattus norvegicus uncharacterized LOC103690779 (LOC103690779), mRNA [XM_008768821]
A_44_P1102673	0.016938396	down	3.9420524	-3.9420524	-1.9789469		S65415 protoplast regeneration and killer toxin resistance gene {Saccharomyces cerevisiae} (exp=-1; wgp=0; cg=0), partial (3%) [TC595377]
A_44_P661776	7.547177E-4	up	3.9411385	3.9411385	1.9786124
A_44_P1362172	0.033435345	up	3.9384902	3.9384902	1.9776427
A_44_P1137315	6.277973E-4	up	3.932907	3.932907	1.9755961		BI288738 UI-R-DK0-cde-d-04-0-UI.s1 UI-R-DK0 Rattus norvegicus cDNA clone UI-R-DK0-cde-d-04-0-UI 3', mRNA sequence [BI288738]
A_43_P14221	0.0011285696	down	3.9060223	-3.9060223	-1.9657001	Tkt	Rattus norvegicus transketolase (Tkt), mRNA [NM_022592]
A_44_P1113939	5.614632E-4	up	3.897024	3.897024	1.9623728	RGD1562638	Rattus norvegicus similar to MAP/microtubule affinity-regulating kinase 3 (RGD1562638), mRNA [NM_001100944]
A_44_P473586	4.4419762E-4	up	3.8947124	3.8947124	1.9615167	Drc1	Rattus norvegicus dynein regulatory complex subunit 1 (Drc1), mRNA [NM_001007009]
A_64_P040994	0.0018964193	up	3.8932557	3.8932557	1.9609771	Cyp4a8	Rattus norvegicus cytochrome P450, family 4, subfamily a, polypeptide 8 (Cyp4a8), mRNA [NM_031605]
A_44_P253208	0.0011871684	down	3.8883111	-3.8883111	-1.9591436	Adamts9	Rattus norvegicus ADAM metallopeptidase with thrombospondin type 1 motif, 9 (Adamts9), mRNA [NM_001107877]
A_44_P1131809	0.01048847	up	3.8831713	3.8831713	1.9572353
A_64_P103901	0.005244812	up	3.878709	3.878709	1.9555765	Acot2	Rattus norvegicus acyl-CoA thioesterase 2 (Acot2), mRNA [NM_138907]
A_44_P1135882	0.002290069	up	3.8778882	3.8778882	1.9552712	LOC102552219	PREDICTED: Rattus norvegicus uncharacterized LOC102552219 (LOC102552219), ncRNA [XR_595069]
A_44_P1112631	0.028207203	down	3.87391	-3.87391	-1.9537904	Mki67	Rattus norvegicus marker of proliferation Ki-67 (Mki67), mRNA [NM_001271366]
A_44_P1130188	0.024855902	down	3.8733504	-3.8733504	-1.9535819	LOC103690477	PREDICTED: Rattus norvegicus uncharacterized LOC103690477 (LOC103690477), ncRNA [XR_589170]
A_44_P1145578	0.0021763528	up	3.8689005	3.8689005	1.9519236	LOC108349310	PREDICTED: Rattus norvegicus CD99 antigen-like protein 2 (LOC108349310), transcript variant X1, mRNA [XM_017588450]
A_44_P1151503	0.0029655665	up	3.8560956	3.8560956	1.9471408
A_64_P023018	0.0030231054	up	3.8525321	3.8525321	1.945807	Gask1a	PREDICTED: Rattus norvegicus family with sequence similarity 198, member A (Fam198a), mRNA [XM_001078210]
A_64_P021428	0.0011594933	up	3.8400762	3.8400762	1.9411349	Slc16a6	Rattus norvegicus solute carrier family 16, member 6 (Slc16a6), mRNA [NM_198760]
A_44_P1133613	0.01594428	up	3.8385477	3.8385477	1.9405606
A_44_P322500	0.037562385	down	3.8375432	-3.8375432	-1.9401829	Nt5c2	5'-nucleotidase, cytosolic II [Source:RGD Symbol;Acc:2323387] [ENSRNOT00000027351]
A_64_P000171	7.13809E-4	down	3.8374789	-3.8374789	-1.9401587	Dhcr24	24-dehydrocholesterol reductase [Source:RGD Symbol;Acc:1306529] [ENSRNOT00000009402]
A_64_P096412	0.0017690188	up	3.8323045	3.8323045	1.9382122	Krt23	Rattus norvegicus keratin 23 (Krt23), mRNA [NM_001008753]
A_44_P274716	7.496388E-4	up	3.8310246	3.8310246	1.9377303	Amdhd1	Rattus norvegicus amidohydrolase domain containing 1 (Amdhd1), mRNA [NM_001191781]
A_44_P1362177	0.00753989	up	3.830928	3.830928	1.937694
A_44_P283339	0.013046484	down	3.8277478	-3.8277478	-1.9364958	Tmed3	Rattus norvegicus transmembrane p24 trafficking protein 3 (Tmed3), mRNA [NM_001004249]
A_42_P733352	0.030119456	down	3.8260376	-3.8260376	-1.9358511		PREDICTED: Rattus norvegicus uncharacterized LOC100912487 (LOC100912487), misc_RNA [XR_145906]
A_44_P514379	5.5922003E-4	down	3.8249035	-3.8249035	-1.9354234	Acaca	CERK1_HUMAN (Q8TCT0) Ceramide kinase (Acylsphingosine kinase) (hCERK) (Lipid kinase 4) (LK4) , partial (4%) [TC592718]
A_64_P140801	4.2831362E-4	up	3.8244414	3.8244414	1.935249	Smim13	Rattus norvegicus small integral membrane protein 13 (Smim13), mRNA [NM_001135576]
A_44_P625333	0.008298417	up	3.8225548	3.8225548	1.9345372	Ctdspl	Rattus norvegicus CTD small phosphatase like (Ctdspl), mRNA [NM_001106865]
A_44_P1144525	0.014405779	up	3.820357	3.820357	1.9337075	LOC103692045	PREDICTED: Rattus norvegicus uncharacterized LOC103692045 (LOC103692045), ncRNA [XR_592004]
A_44_P1365881	0.002498589	up	3.8190668	3.8190668	1.9332201	Srrm5	Rattus norvegicus serine/arginine repetitive matrix 5 (Srrm5), mRNA [NM_001317106]
A_44_P1086829	0.002170223	up	3.8154612	3.8154612	1.9318575	Unc5c	Rattus norvegicus unc-5 netrin receptor C (Unc5c), mRNA [NM_199407]
A_44_P234315	0.025497187	up	3.8136058	3.8136058	1.9311557		FM059618 etcmkid Rattus norvegicus cDNA clone etcmkidP0004I18 5', mRNA sequence [FM059618]
A_64_P023869	0.012777878	up	3.799973	3.799973	1.9259892	Hacl1	Rattus norvegicus 2-hydroxyacyl-CoA lyase 1 (Hacl1), mRNA [NM_053493]
A_44_P292568	0.0049239616	up	3.7997675	3.7997675	1.9259111	Olr233	Rattus norvegicus olfactory receptor 233 (Olr233), mRNA [NM_001000207]
A_44_P1115976	0.0015355523	up	3.7981517	3.7981517	1.9252975
A_44_P1133089	0.005985399	down	3.7944043	-3.7944043	-1.9238734	LOC103690621	PREDICTED: Rattus norvegicus uncharacterized LOC103690621 (LOC103690621), ncRNA [XR_595149]
A_42_P676553	0.007868041	down	3.7847767	-3.7847767	-1.9202081	Tnni3	Rattus norvegicus troponin I3, cardiac type (Tnni3), mRNA [NM_017144]
A_44_P491724	7.4918085E-4	down	3.7669232	-3.7669232	-1.9133866	Zfp57	Rattus norvegicus zinc finger protein 57 (Zfp57), mRNA [NM_213565]
A_44_P967122	0.0033356082	up	3.764092	3.764092	1.9123019		UI-R-BJ2-bra-f-06-0-UI.s10 UI-R-BJ2 Rattus norvegicus cDNA clone UI-R-BJ2-bra-f-06-0-UI 3', mRNA sequence [CK843405]
A_42_P723641	0.0061678216	down	3.7612295	-3.7612295	-1.9112043	Popdc2	Rattus norvegicus popeye domain containing 2 (Popdc2), mRNA [NM_199113]
A_64_P138041	0.019339407	up	3.7609553	3.7609553	1.9110992	Man1a1	mannosidase, alpha, class 1A, member 1 [Source:RGD Symbol;Acc:1310891] [ENSRNOT00000085465]
A_44_P1102223	0.003504498	up	3.754772	3.754772	1.9087253	Jmy	PREDICTED: Rattus norvegicus junction mediating and regulatory protein, p53 cofactor (Jmy), transcript variant X1, mRNA [XM_017591172]
A_44_P1136012	0.0051625455	down	3.7492597	-3.7492597	-1.9066057
A_44_P1159378	0.006829736	up	3.747145	3.747145	1.9057918	Crem	Rattus norvegicus cAMP responsive element modulator (Crem), transcript variant 9, mRNA [NM_001271248]
A_42_P453131	0.0012752258	down	3.7460997	-3.7460997	-1.9053893	Cntn1	PREDICTED: Rattus norvegicus contactin 1 (Cntn1), transcript variant X2, mRNA [XM_006242177]
A_44_P395572	0.022499362	up	3.7358434	3.7358434	1.901434	Nr1d2	Rattus norvegicus nuclear receptor subfamily 1, group D, member 2 (Nr1d2), mRNA [NM_147210]
A_44_P1102298	0.010844428	up	3.7356489	3.7356489	1.9013588
A_44_P1361510	0.0014631416	up	3.732689	3.732689	1.9002153	RGD1561796	RGD1561796 [Source:RGD Symbol;Acc:1561796] [ENSRNOT00000076382]
A_44_P1162610	0.041098736	up	3.72831	3.72831	1.8985218
A_64_P042591	0.007496077	up	3.7225723	3.7225723	1.8962998	RGD1307461	Rattus norvegicus similar to RIKEN cDNA 6430571L13 gene; similar to g20 protein (RGD1307461), mRNA [NM_001106854]
A_44_P1147276	0.0010662962	up	3.716231	3.716231	1.8938402	LOC103693202	PREDICTED: Rattus norvegicus uncharacterized LOC103693202 (LOC103693202), transcript variant X1, mRNA [XM_008766883]
A_44_P1112816	0.024998546	down	3.7108788	-3.7108788	-1.8917608	Ddc	Rattus norvegicus dopa decarboxylase (Ddc), transcript variant 1, mRNA [NM_012545]
A_44_P1001820	0.0021531635	up	3.704742	3.704742	1.8893731	Slc22a5	Rattus norvegicus solute carrier family 22 member 5 (Slc22a5), mRNA [NM_019269]
A_42_P795577	0.011624706	down	3.7017598	-3.7017598	-1.8882113	Acacb	acetyl-CoA carboxylase beta [Source:RGD Symbol;Acc:620500] [ENSRNOT00000078868]
A_64_P025753	0.019248819	down	3.7013192	-3.7013192	-1.8880396	Bub1	Rattus norvegicus BUB1 mitotic checkpoint serine/threonine kinase (Bub1), mRNA [NM_001106507]
A_44_P544661	0.0054685567	up	3.6881807	3.6881807	1.8829093	Cyp3a2	Rattus norvegicus cytochrome P450, family 3, subfamily a, polypeptide 2 (Cyp3a2), mRNA [NM_153312]
A_43_P12589	0.020571066	down	3.6843476	-3.6843476	-1.8814092	Epha3	Rattus norvegicus Eph receptor A3 (Epha3), mRNA [NM_031564]
A_44_P822364	0.0019416151	up	3.6797893	3.6797893	1.8796232
A_44_P1101958	0.0012672878	up	3.6769779	3.6769779	1.8785205		702972302T1 RABTNOT02 Rattus norvegicus cDNA clone 702972302 3', mRNA sequence [CK222233]
A_44_P514910	0.0020258871	up	3.672153	3.672153	1.8766261		704296689J1 RAMLNOC02 Rattus norvegicus cDNA clone 704296689 3', mRNA sequence [CK223514]
A_44_P1088661	0.0023355857	up	3.6680543	3.6680543	1.875015	Tenm4	Rattus norvegicus teneurin transmembrane protein 4 (Tenm4), mRNA [NM_001191628]
A_44_P1161397	0.025663484	down	3.6649394	-3.6649394	-1.8737893
A_44_P1122554	0.0012284032	up	3.6585639	3.6585639	1.8712775	LOC102547911	PREDICTED: Rattus norvegicus uncharacterized LOC102547911 (LOC102547911), transcript variant X3, ncRNA [XR_001837272]
A_44_P241409	0.0021979755	up	3.6565871	3.6565871	1.8704977	Vgll4	Rattus norvegicus vestigial-like family member 4 (Vgll4), mRNA [NM_001015004]
A_44_P1154276	8.095225E-4	up	3.654449	3.654449	1.8696538		predicted gene 14597 [Source:MGI Symbol;Acc:MGI:3711766] [ENSRNOT00000080501]
A_43_P19534	6.525284E-4	down	3.6487777	-3.6487777	-1.8674133	Cenpk	Rattus norvegicus centromere protein K (Cenpk), mRNA [NM_001106407]
A_64_P044717	0.037916955	up	3.6368601	3.6368601	1.8626934	Zfp394	Rattus norvegicus zinc finger protein 394 (Zfp394), mRNA [NM_145724]
A_44_P1105070	0.0043931445	up	3.6352005	3.6352005	1.8620349	Wnk1	PREDICTED: Rattus norvegicus WNK lysine deficient protein kinase 1 (Wnk1), transcript variant X8, mRNA [XM_017592389]
A_44_P1127149	8.8510243E-4	up	3.63414	3.63414	1.861614	LOC103692681	PREDICTED: Rattus norvegicus uncharacterized LOC103692681 (LOC103692681), transcript variant X2, ncRNA [XR_001838642]
A_44_P1123623	0.021362124	down	3.6314926	-3.6314926	-1.8605626	LOC102552017	PREDICTED: Rattus norvegicus uncharacterized LOC102552017 (LOC102552017), transcript variant X1, ncRNA [XR_001837570]
A_64_P146820	8.88732E-4	down	3.6285176	-3.6285176	-1.8593802	Ces4a	Rattus norvegicus carboxylesterase 4A (Ces4a), mRNA [NM_001106176]
A_44_P1108048	0.0011332539	up	3.6245003	3.6245003	1.8577821
A_64_P038972	0.016733885	down	3.622392	-3.622392	-1.8569427	Ppfia4	Rattus norvegicus PTPRF interacting protein alpha 4 (Ppfia4), mRNA [NM_080409]
A_44_P1099498	0.0152316075	up	3.617132	3.617132	1.8548462
A_44_P1140025	0.0098779	up	3.6159527	3.6159527	1.8543758	LOC103694395	PREDICTED: Rattus norvegicus uncharacterized LOC103694395 (LOC103694395), ncRNA [XR_597353]
A_44_P1113265	0.0012446812	up	3.6090336	3.6090336	1.8516126	RGD1564324	PREDICTED: Rattus norvegicus similar to dehydrogenase/reductase member 2 (RGD1564324), transcript variant X4, mRNA [XM_008770670]
A_44_P387780	0.0028529041	up	3.6028695	3.6028695	1.8491464	Cyp8b1	Rattus norvegicus cytochrome P450, family 8, subfamily b, polypeptide 1 (Cyp8b1), mRNA [NM_031241]
A_44_P1148933	9.7432296E-4	up	3.5981474	3.5981474	1.8472543	LOC108352751	PREDICTED: Rattus norvegicus S-antigen protein-like (LOC108352751), mRNA [XM_017599469]
A_44_P1151488	0.0046759467	up	3.5812647	3.5812647	1.8404691
A_44_P1120298	7.010138E-4	down	3.573781	-3.573781	-1.8374512	LOC102547718	PREDICTED: Rattus norvegicus uncharacterized LOC102547718 (LOC102547718), transcript variant X1, ncRNA [XR_344297]
A_42_P796452	0.0068382476	down	3.5718207	-3.5718207	-1.8366597	Acacb	Rattus norvegicus acetyl-CoA carboxylase beta (Acacb), mRNA [NM_053922]
A_44_P519142	0.0063579646	up	3.567218	3.567218	1.8347994		AGENCOURT_17606971 NIH_MGC_235 Rattus norvegicus cDNA clone IMAGE:7106078 5', mRNA sequence [CK479957]
A_44_P306344	5.406563E-4	down	3.5599537	-3.5599537	-1.8318584	F2rl2	Rattus norvegicus coagulation factor II (thrombin) receptor-like 2 (F2rl2), mRNA [NM_053313]
A_44_P1367871	0.03692194	up	3.5577245	3.5577245	1.8309548
A_44_P1368841	0.012495597	up	3.5532954	3.5532954	1.8291576
A_44_P1123539	9.578095E-4	down	3.5443482	-3.5443482	-1.8255203	LOC103692061	PREDICTED: Rattus norvegicus uncharacterized LOC103692061 (LOC103692061), ncRNA [XR_592044]
A_44_P1144813	0.0035692486	up	3.5441594	3.5441594	1.8254435	LOC108353476	PREDICTED: Rattus norvegicus uncharacterized LOC108353476 (LOC108353476), mRNA [XM_017602864]
A_44_P290403	0.0028288888	up	3.5422149	3.5422149	1.8246517	Dlx2	Rattus norvegicus distal-less homeobox 2 (Dlx2), mRNA [NM_001191746]
A_44_P1120268	0.015011149	down	3.539439	-3.539439	-1.8235207	LOC102555205	PREDICTED: Rattus norvegicus uncharacterized LOC102555205 (LOC102555205), ncRNA [XR_344283]
A_64_P150008	0.001506052	down	3.5388546	-3.5388546	-1.8232825	LOC102554600	PREDICTED: Rattus norvegicus uncharacterized LOC102554600 (LOC102554600), mRNA [XM_017592324]
A_44_P201028	0.011880806	up	3.531886	3.531886	1.8204387	Nfil3	Rattus norvegicus nuclear factor, interleukin 3 regulated (Nfil3), mRNA [NM_053727]
A_44_P337294	8.0918707E-4	up	3.5273702	3.5273702	1.818593	Eci1	Rattus norvegicus enoyl-CoA delta isomerase 1 (Eci1), mRNA [NM_017306]
A_42_P647866	0.0033744378	up	3.5260916	3.5260916	1.8180699	Arl5b	PREDICTED: Rattus norvegicus ADP-ribosylation factor like GTPase 5B (Arl5b), transcript variant X1, mRNA [XM_006254312]
A_44_P303430	0.0015840133	up	3.5224142	3.5224142	1.8165646		Q4T167_TETNG (Q4T167) Chromosome 18 SCAF10707, whole genome shotgun sequence. (Fragment), partial (8%) [TC592865]
A_44_P1101006	0.0053282785	up	3.5148828	3.5148828	1.8134766	Zfp939	PREDICTED: Rattus norvegicus zinc finger protein 939 (Zfp939), transcript variant X1, mRNA [XM_006228931]
A_44_P163666	0.0011560203	up	3.5144415	3.5144415	1.8132954	Lipo1	lipase, member O1 [Source:RGD Symbol;Acc:1565682] [ENSRNOT00000035013]
A_44_P1163932	0.0076326597	up	3.5134137	3.5134137	1.8128735	Sqor	sulfide quinone reductase-like (yeast) [Source:RGD Symbol;Acc:1564504] [ENSRNOT00000089204]
A_44_P1118969	0.004404578	up	3.5112677	3.5112677	1.8119919	Trpm6	transient receptor potential cation channel, subfamily M, member 6 [Source:RGD Symbol;Acc:1309942] [ENSRNOT00000017892]
A_44_P1365393	0.010119166	up	3.51097	3.51097	1.8118697	Vom2r65	Rattus norvegicus vomeronasal 2 receptor, 65 (Vom2r65), mRNA [NM_001099654]
A_44_P470043	0.0036080175	up	3.5086958	3.5086958	1.8109349	Brd1	Rattus norvegicus bromodomain containing 1 (Brd1), mRNA [NM_001108103]
A_44_P562652	0.0019333094	up	3.5066848	3.5066848	1.8101077		UI-R-C0-gw-c-09-0-UI.s1 UI-R-C0 Rattus norvegicus cDNA clone UI-R-C0-gw-c-09-0-UI 3', mRNA sequence [AA964077]
A_44_P1362560	0.001756202	down	3.4928076	-3.4928076	-1.8043872	Mmab	methylmalonic aciduria (cobalamin deficiency) cblB type [Source:RGD Symbol;Acc:1596242] [ENSRNOT00000072511]
A_44_P1131553	0.039113313	up	3.4753244	3.4753244	1.7971476	LOC103693339	PREDICTED: Rattus norvegicus uncharacterized LOC103693339 (LOC103693339), ncRNA [XR_594724]
A_44_P960566	0.016823357	down	3.4719045	-3.4719045	-1.7957273	Tp53inp1	PREDICTED: Rattus norvegicus tumor protein p53 inducible nuclear protein 1 (Tp53inp1), transcript variant X1, mRNA [XM_017593225]
A_42_P567268	7.233485E-4	up	3.4717782	3.4717782	1.7956747	Mt2A	Rattus norvegicus metallothionein 2A (Mt2A), mRNA [NM_001137564]
A_44_P1149869	0.0277896	up	3.471511	3.471511	1.7955637
A_42_P527092	0.0026907802	up	3.4696176	3.4696176	1.7947767	Hectd2	Rattus norvegicus HECT domain E3 ubiquitin protein ligase 2 (Hectd2), mRNA [NM_001107608]
A_44_P1087681	0.0038045573	down	3.4663846	-3.4663846	-1.7934318	Traip	Rattus norvegicus TRAF-interacting protein (Traip), mRNA [NM_001109004]
A_44_P948592	0.008664867	up	3.4532495	3.4532495	1.7879546		AMGNNUC:NRDG1-00122-G2-A nrdg1 (10855) Rattus norvegicus cDNA clone nrdg1-00122-g2 5', mRNA sequence [CB609809]
A_44_P159271	0.024158383	up	3.453036	3.453036	1.7878654	Prr15	Rattus norvegicus proline rich 15 (Prr15), mRNA [NM_001104527]
A_44_P1093212	0.021872224	down	3.4497154	-3.4497154	-1.7864773	Plekhg6	PREDICTED: Rattus norvegicus pleckstrin homology and RhoGEF domain containing G6 (Plekhg6), transcript variant X1, mRNA [XM_002726447]
A_64_P115212	0.013338634	down	3.446097	-3.446097	-1.7849633	Il17rb	Rattus norvegicus interleukin 17 receptor B (Il17rb), mRNA [NM_001107290]
A_43_P11285	0.010558988	down	3.4446447	-3.4446447	-1.7843552	Cenps	Rattus norvegicus centromere protein S (Cenps), mRNA [NM_001204879]
A_44_P1141920	8.6328987E-4	up	3.4395514	3.4395514	1.7822204
A_44_P178159	0.0011611442	up	3.4364448	3.4364448	1.7809167	Rnf24	AMGNNUC:NRHY5-00156-E3-A W Rat hypothalamus (10471) Rattus norvegicus cDNA clone nrhy5-00156-e3 5', mRNA sequence [CB586005]
A_44_P1360756	0.0043632034	up	3.4348114	3.4348114	1.7802309	Vom2r61	Rattus norvegicus vomeronasal 2 receptor, 61 (Vom2r61), mRNA [NM_001099508]
A_64_P140772	0.016692577	up	3.4346325	3.4346325	1.7801558	Sbp	Rattus norvegicus spermine binding protein (Sbp), transcript variant 1, mRNA [NM_013024]
A_44_P556299	0.001453723	down	3.4322753	-3.4322753	-1.7791653	Nsdhl	NAD(P) dependent steroid dehydrogenase-like [Source:RGD Symbol;Acc:1359337] [ENSRNOT00000091154]
A_44_P1040926	7.3666975E-4	up	3.4284084	3.4284084	1.7775389	Akr1c19	Rattus norvegicus aldo-keto reductase family 1, member C19 (Akr1c19), mRNA [NM_001100576]
A_44_P1090196	0.01563369	down	3.4179456	-3.4179456	-1.7731295	Angptl8	Rattus norvegicus angiopoietin-like 8 (Angptl8), mRNA [NM_001271710]
A_44_P960765	0.025470048	up	3.4179275	3.4179275	1.7731217	Chodl	Rattus norvegicus chondrolectin (Chodl), mRNA [NM_001105894]
A_64_P338784	0.048700806	up	3.415416	3.415416	1.7720612	Lipe	Rattus norvegicus lipase E, hormone sensitive type (Lipe), mRNA [NM_012859]
A_44_P228145	0.015362953	up	3.4124756	3.4124756	1.7708187		UI-R-BX0-arn-a-01-0-UI.s10.temp UI-R-BX0 Rattus norvegicus cDNA clone UI-R-BX0-arn-a-01-0-UI.temp 3', mRNA sequence [CK843548]
A_44_P1132089	0.045359097	down	3.4114954	-3.4114954	-1.7704042
A_44_P1364337	0.0014745793	up	3.402956	3.402956	1.7667885	Catsper4	cation channel, sperm associated 4 [Source:RGD Symbol;Acc:1565213] [ENSRNOT00000021919]
A_64_P111709	0.014162425	up	3.401958	3.401958	1.7663653	Olr286	Rattus norvegicus olfactory receptor 286 (Olr286), mRNA [NM_001000554]
A_42_P838474	0.0019629374	down	3.4004276	-3.4004276	-1.7657162	Spock1	Rattus norvegicus sparc/osteonectin, cwcv and kazal like domains proteoglycan 1 (Spock1), mRNA [NM_001271297]
A_64_P154859	0.004476147	down	3.3999434	-3.3999434	-1.7655107	Slc44a3	Rattus norvegicus solute carrier family 44, member 3 (Slc44a3), mRNA [NM_001013914]
A_44_P339757	0.0064461003	up	3.3971848	3.3971848	1.7643397		GB
A_42_P647072	8.337101E-4	up	3.3922272	3.3922272	1.7622328	Mapkapk2	Rattus norvegicus mitogen-activated protein kinase-activated protein kinase 2 (Mapkapk2), mRNA [NM_178102]
A_64_P031665	0.02894231	up	3.3892152	3.3892152	1.7609513	Rell2	Rattus norvegicus RELT-like 2 (Rell2), mRNA [NM_001014149]
A_64_P019361	0.0060337787	up	3.3877242	3.3877242	1.7603164	Cyp4a2	Rattus norvegicus cytochrome P450, family 4, subfamily a, polypeptide 2 (Cyp4a2), mRNA [NM_001044770]
A_44_P1138515	0.0026232342	up	3.3872378	3.3872378	1.7601092	LOC102553404	PREDICTED: Rattus norvegicus uncharacterized LOC102553404 (LOC102553404), ncRNA [XR_341813]
A_44_P1113115	0.005256216	down	3.3858938	-3.3858938	-1.7595367	Ddhd1	PREDICTED: Rattus norvegicus DDHD domain containing 1 (Ddhd1), transcript variant X1, mRNA [XM_017599652]
A_44_P421391	0.005335896	up	3.375453	3.375453	1.755081	Slc1a4	Rattus norvegicus solute carrier family 1 member 4 (Slc1a4), mRNA [NM_198763]
A_44_P287564	0.0041801333	down	3.371926	-3.371926	-1.753573		CR461559 Rat pBluescript Lion Rattus norvegicus cDNA clone LIONp463B08206 3', mRNA sequence [CR461559]
A_44_P1138446	0.001253868	up	3.366956	3.366956	1.7514448	LOC103694161	PREDICTED: Rattus norvegicus uncharacterized LOC103694161 (LOC103694161), ncRNA [XR_596898]
A_44_P1119604	0.008244157	up	3.3632982	3.3632982	1.7498766	LOC102554243	PREDICTED: Rattus norvegicus uncharacterized LOC102554243 (LOC102554243), ncRNA [XR_344004]
A_44_P1093970	0.005600018	up	3.3580496	3.3580496	1.7476236	LOC103692534	PREDICTED: Rattus norvegicus uncharacterized LOC103692534 (LOC103692534), transcript variant X3, mRNA [XM_008776183]
A_44_P344999	8.8749017E-4	down	3.3527346	-3.3527346	-1.7453382		PREDICTED: Rattus norvegicus M-phase phosphoprotein 6-like (LOC679765), misc_RNA [XR_146443]
A_44_P1127257	0.0026820197	down	3.3510633	-3.3510633	-1.7446189
A_44_P1145400	0.016110431	down	3.3507717	-3.3507717	-1.7444934	LOC102556501	PREDICTED: Rattus norvegicus uncharacterized LOC102556501 (LOC102556501), transcript variant X2, ncRNA [XR_354449]
A_44_P1147364	0.003954037	up	3.3500903	3.3500903	1942-01-01
A_64_P079503	0.0068465746	up	3.3472762	3.3472762	1.7429876	Noct	Rattus norvegicus nocturnin (Noct), mRNA [NM_138526]
A_64_P157229	0.008976051	down	3.3437917	-3.3437917	-1.741485		osteoclast stimulatory transmembrane protein [Source:RGD Symbol;Acc:1308620] [ENSRNOT00000025820]
A_42_P650795	0.0073510385	down	3.3413405	-3.3413405	-1.740427	Hspa4l	PREDICTED: Rattus norvegicus heat shock protein 4-like (Hspa4l), transcript variant X1, mRNA [XM_006232297]
A_44_P1087686	0.0014514901	down	3.331732	-3.331732	-1.7362723	Ces4a	Rattus norvegicus carboxylesterase 4A (Ces4a), mRNA [NM_001106176]
A_44_P287842	0.0010656788	down	3.325127	-3.325127	-1.7334094	Cyp2c22	Rattus norvegicus cytochrome P450, family 2, subfamily c, polypeptide 22 (Cyp2c22), mRNA [NM_138512]
A_44_P1103485	0.002770321	up	3.323054	3.323054	1.7325097	Crb2	PREDICTED: Rattus norvegicus crumbs 2, cell polarity complex component (Crb2), transcript variant X1, mRNA [XM_006234103]
A_64_P132507	0.003622424	up	3.3227508	3.3227508	1.7323781	LOC684170	similar to olfactory receptor 566 [Source:RGD Symbol;Acc:1593886] [ENSRNOT00000067344]
A_44_P1083163	0.0027673573	up	3.320837	3.320837	1.7315469	Pnpla7	Rattus norvegicus patatin-like phospholipase domain containing 7 (Pnpla7), mRNA [NM_144738]
A_44_P388745	0.006596912	up	3.3174603	3.3174603	1.7300792	Olr1343	Rattus norvegicus olfactory receptor 1343 (Olr1343), mRNA [NM_001001088]
A_44_P1088356	0.0017303547	up	3.315722	3.315722	1.729323	Prmt8	Rattus norvegicus protein arginine methyltransferase 8 (Prmt8), mRNA [NM_001271385]
A_44_P1156717	0.049965687	up	3.3142123	3.3142123	1.728666	Pde1b	PREDICTED: Rattus norvegicus phosphodiesterase 1B (Pde1b), transcript variant X1, mRNA [XM_006242386]
A_44_P1159318	0.003974023	up	3.3117998	3.3117998	1.7276155	LOC100912365	uncharacterized LOC100912365 [Source:RGD Symbol;Acc:6487276] [ENSRNOT00000005407]
A_44_P1152109	0.0052806027	up	3.3104675	3.3104675	1.7270349	Sema6a	semaphorin 6A [Source:RGD Symbol;Acc:1305493] [ENSRNOT00000005446]
A_44_P1152342	8.245186E-4	down	3.3052647	-3.3052647	-1.7247658
A_44_P159040	0.0039907745	down	3.30419	-3.30419	-1.7242966	Vegfb	Rattus norvegicus vascular endothelial growth factor B (Vegfb), mRNA [NM_053549]
A_44_P507571	0.01905257	down	3.3039453	-3.3039453	-1.7241898	Ccne1	Rattus norvegicus cyclin E1 (Ccne1), mRNA [NM_001100821]
A_44_P477212	0.0015264623	up	3.3017893	3.3017893	1.723248		UI-R-CW0-bxn-c-09-0-UI.s1 UI-R-CW0 Rattus norvegicus cDNA clone UI-R-CW0-bxn-c-09-0-UI 3', mRNA sequence [BI278569]
A_44_P244851	0.011001865	down	3.2996924	-3.2996924	-1.7223315	Car3	Rattus norvegicus carbonic anhydrase 3 (Car3), mRNA [NM_019292]
A_64_P154811	0.010620218	down	3.2990708	-3.2990708	-1.7220597	Ccdc146	Rattus norvegicus coiled-coil domain containing 146 (Ccdc146), mRNA [NM_001025044]
A_44_P1133680	8.658908E-4	down	3.298596	-3.298596	-1.7218521
A_44_P1150516	0.00947878	up	3.2981598	3.2981598	1.7216613
A_64_P088126	0.007597056	down	3.2942603	-3.2942603	-1.7199545	Mrps27	Rattus norvegicus mitochondrial ribosomal protein S27 (Mrps27), transcript variant 2, mRNA [NM_001108543]
A_44_P755803	0.0073498175	up	3.2922623	3.2922623	1.7190793		UI-R-BT0-qc-g-05-0-UI.s1 UI-R-BT0 Rattus norvegicus cDNA clone UI-R-BT0-qc-g-05-0-UI 3', mRNA sequence [AI145976]
A_42_P493380	0.04290604	up	3.2877686	3.2877686	1.7171087	Myc	Rattus norvegicus myelocytomatosis oncogene (Myc), mRNA [NM_012603]
A_44_P1105255	0.0042819954	up	3.2867236	3.2867236	1.7166501	Plekha5	PREDICTED: Rattus norvegicus pleckstrin homology domain containing A5 (Plekha5), transcript variant X27, mRNA [XM_008763367]
A_44_P1140919	0.0027589775	up	3.2853124	3.2853124	1.7160306	LOC102554188	PREDICTED: Rattus norvegicus uncharacterized LOC102554188 (LOC102554188), transcript variant X2, ncRNA [XR_001835105]
A_44_P1086350	0.007245521	up	3.2839825	3.2839825	1.7154465	Cyp4a3	Rattus norvegicus cytochrome P450, family 4, subfamily a, polypeptide 3 (Cyp4a3), mRNA [NM_175760]
A_44_P1138346	0.026863428	down	3.2819006	-3.2819006	-1.7145315
A_44_P1083572	0.0091967145	up	3.278066	3.278066	1.7128448	Pptc7	Rattus norvegicus PTC7 protein phosphatase homolog (Pptc7), mRNA [NM_001107141]
A_44_P1163260	0.0055397856	down	3.275545	-3.275545	-1.7117349	Fabp12	PREDICTED: Rattus norvegicus fatty acid binding protein 12 (Fabp12), transcript variant X10, misc_RNA [XR_590975]
A_44_P1121076	0.0010635962	up	3.2722092	3.2722092	1.7102649	LOC102548573	PREDICTED: Rattus norvegicus uncharacterized LOC102548573 (LOC102548573), ncRNA [XR_344612]
A_64_P040870	0.0077263555	up	3.2691405	3.2691405	1.7089113	Cyp4a1	Rattus norvegicus cytochrome P450, family 4, subfamily a, polypeptide 1 (Cyp4a1), mRNA [NM_175837]
A_43_P14621	0.0010617247	down	3.2612603	-3.2612603	-1.7054296	Dbi	Rattus norvegicus diazepam binding inhibitor, acyl-CoA binding protein (Dbi), mRNA [NM_031853]
A_64_P030665	0.029506076	down	3.2594762	-3.2594762	-1.7046402	Inhbe	Rattus norvegicus inhibin beta E subunit (Inhbe), mRNA [NM_031815]
A_64_P025639	0.0029295078	down	3.2571545	-3.2571545	-1.7036121	Rec8	Rattus norvegicus REC8 meiotic recombination protein (Rec8), mRNA [NM_001011916]
A_44_P1085681	0.0018613315	up	3.252656	3.252656	1.7016182	Net1	Rattus norvegicus neuroepithelial cell transforming 1 (Net1), mRNA [NM_001039023]
A_42_P524633	0.011417332	up	3.2506483	3.2506483	1.7007275	Fam134b	Rattus norvegicus family with sequence similarity 134, member B (Fam134b), mRNA [NM_001034912]
A_44_P1085686	0.0013333638	down	3.2390091	-3.2390091	-1.6955525	Elovl5	Rattus norvegicus ELOVL fatty acid elongase 5 (Elovl5), mRNA [NM_134382]
A_44_P1146742	0.006274174	up	3.235249	3.235249	1.6938767	LOC102552977	PREDICTED: Rattus norvegicus uncharacterized LOC102552977 (LOC102552977), ncRNA [XR_356201]
A_44_P1157728	0.0024448289	down	3.2308981	-3.2308981	-1.6919353		epithelial cell transforming 2 like [Source:RGD Symbol;Acc:9246970] [ENSRNOT00000079531]
A_64_P160255	0.0010204552	down	3.2299078	-3.2299078	-1.6914929	Zfp870	Rattus norvegicus zinc finger protein 870 (Zfp870), mRNA [NM_001163062]
A_44_P1097636	0.026785107	down	3.2262034	-3.2262034	-1.6898373		similar to Discs large homolog 5 (Placenta and prostate DLG) (Discs large protein P-dlg) [Source:RGD Symbol;Acc:1592283] [ENSRNOT00000050464]
A_44_P1022458	0.020620167	down	3.2255602	-3.2255602	-1.6895497	Tubb6	Rattus norvegicus tubulin, beta 6 class V (Tubb6), mRNA [NM_001025675]
A_64_P059964	0.0077755987	down	3.225097	-3.225097	-1.6893425	Tlcd1	Rattus norvegicus TLC domain containing 1 (Tlcd1), mRNA [NM_001013858]
A_44_P1126157	0.0020716123	up	3.223957	3.223957	1.6888325	LOC102557388	PREDICTED: Rattus norvegicus uncharacterized LOC102557388 (LOC102557388), transcript variant X1, ncRNA [XR_001838618]
A_44_P290074	0.0021605943	down	3.223843	-3.223843	-1.6887815		UI-R-G0-ul-d-04-0-UI.s1 UI-R-G0 Rattus norvegicus cDNA clone UI-R-G0-ul-d-04-0-UI 3', mRNA sequence [AI575097]
A_44_P1121920	0.006581399	up	3.2207673	3.2207673	1.6874044	LOC102549214	PREDICTED: Rattus norvegicus uncharacterized LOC102549214 (LOC102549214), ncRNA [XR_001837135]
A_44_P1135392	0.011273294	down	3.2148266	-3.2148266	-1.6847409	LOC103693208	PREDICTED: Rattus norvegicus uncharacterized LOC103693208 (LOC103693208), transcript variant X1, ncRNA [XR_594322]
A_44_P1126874	0.0030309572	up	3.2046828	3.2046828	1.6801815	Fancm	PREDICTED: Rattus norvegicus Fanconi anemia, complementation group M (Fancm), transcript variant X8, misc_RNA [XR_593053]
A_44_P1130402	0.0018769325	up	3.2037945	3.2037945	1.6797816
A_64_P116869	0.0030682774	down	3.2031476	-3.2031476	-1.6794903	Tmem97	Rattus norvegicus transmembrane protein 97 (Tmem97), mRNA [NM_001008334]
A_44_P1361480	0.048348993	up	3.1999607	3.1999607	1.6780542	Mfsd2b	major facilitator superfamily domain containing 2B [Source:RGD Symbol;Acc:1561716] [ENSRNOT00000032664]
A_44_P1137203	0.00199545	up	3.1980824	3.1980824	1.6772071	LOC103693996	PREDICTED: Rattus norvegicus uncharacterized LOC103693996 (LOC103693996), ncRNA [XR_596528]
A_44_P1097073	0.017575229	up	3.196982	3.196982	1.6767106	LOC102553031	PREDICTED: Rattus norvegicus zinc finger and SCAN domain-containing protein 20-like (LOC102553031), transcript variant X1, mRNA [XM_008765214]
A_44_P1361781	0.018290874	down	3.196973	-3.196973	-1.6767066		Rattus norvegicus similar to 3-phosphoglycerate dehydrogenase (LOC290415), mRNA [XM_224421]
A_44_P1127469	0.028261052	up	3.1931317	3.1931317	1.674972	LOC103692717	PREDICTED: Rattus norvegicus uncharacterized LOC103692717 (LOC103692717), ncRNA [XR_593208]
A_44_P223630	0.03188361	up	3.1918678	3.1918678	1.6744009	Camk2n1	AMGNNUC:URRG1-00020-D3-A urrg1 (14046) Rattus norvegicus cDNA clone urrg1-00020-d3 5', mRNA sequence [CB580765]
A_44_P1097053	0.04509827	up	3.1859264	3.1859264	1.6717129	LOC100911949	PREDICTED: Rattus norvegicus uncharacterized LOC100911949 (LOC100911949), mRNA [XM_003751342]
A_44_P1363820	0.010099445	up	3.1827834	3.1827834	1.6702889
A_44_P304190	0.022175696	up	3.1801338	3.1801338	1.6690874	Tifa	Rattus norvegicus TRAF-interacting protein with forkhead-associated domain (Tifa), mRNA [NM_001014044]
A_44_P1150467	8.6353516E-4	up	3.1754787	3.1754787	1.6669741		BE110241 UI-R-CA0-axk-g-01-0-UI.s1 UI-R-CA0 Rattus norvegicus cDNA clone UI-R-CA0-axk-g-01-0-UI 3', mRNA sequence [BE110241]
A_44_P1109274	0.027826583	down	3.173571	-3.173571	-1.6661072	Hjurp	PREDICTED: Rattus norvegicus Holliday junction recognition protein (Hjurp), transcript variant X1, mRNA [XM_006245393]
A_44_P1101191	0.008055098	down	3.1730514	-3.1730514	-1.6658709	Otud7a	PREDICTED: Rattus norvegicus OTU deubiquitinase 7A (Otud7a), transcript variant X1, mRNA [XM_008759566]
A_44_P855180	0.01047463	up	3.1686552	3.1686552	1.6638707
A_44_P1364801	0.027973251	up	3.153955	3.153955	1.6571621		Rattus norvegicus, 30 clones, strain BN/SsNHsdMCW RNOR03322764, whole genome shotgun sequence [AABR03132334]
A_44_P1109734	0.022076417	up	3.152439	3.152439	1.6564685		Rattus norvegicus chromosome 10, 7 clones, strain BN/SsNHsdMCW RNOR03214123, whole genome shotgun sequence [AABR03073170]
A_42_P681123	8.5085654E-4	down	3.1512756	-3.1512756	-1.6559359	Uba7	Rattus norvegicus ubiquitin-like modifier activating enzyme 7 (Uba7), mRNA [NM_001106856]
A_42_P835903	0.007823047	up	3.1504338	3.1504338	1.6555505	Hsdl2	Rattus norvegicus hydroxysteroid dehydrogenase like 2 (Hsdl2), mRNA [NM_001025697]
A_42_P591944	0.007881075	up	3.1473594	3.1473594	1.6541419	Hbg1	Rattus norvegicus hemoglobin subunit gamma 1 (Hbg1), mRNA [NM_172093]
A_64_P006478	0.0022249757	up	3.146139	3.146139	1.6535823	Slc25a34	Rattus norvegicus solute carrier family 25, member 34 (Slc25a34), mRNA [NM_001013936]
A_44_P1141818	0.01136055	down	3.142854	-3.142854	-1.6520752	LOC102552999	PREDICTED: Rattus norvegicus uncharacterized LOC102552999 (LOC102552999), transcript variant X3, ncRNA [XR_001835524]
A_64_P126493	0.006780063	up	3.1422827	3.1422827	1.6518129	Crem	Rattus norvegicus cAMP responsive element modulator (Crem), transcript variant 3, mRNA [NM_001110860]
A_44_P985640	0.0020829325	up	3.1404061	3.1404061	1.6509511		UI-R-C2p-qr-e-05-0-UI.s1 UI-R-C2p Rattus norvegicus cDNA clone UI-R-C2p-qr-e-05-0-UI 3', mRNA sequence [AI555552]
A_42_P708593	0.034201667	down	3.1389275	-3.1389275	-1.6502717	Per2	Rattus norvegicus period circadian clock 2 (Per2), mRNA [NM_031678]
A_42_P483302	0.0010247142	up	3.133706	3.133706	1.6478698	Zfp612	Rattus norvegicus zinc finger protein 612 (Zfp612), mRNA [NM_001107428]
A_44_P1093851	0.013191674	up	3.1335454	3.1335454	1.6477959	Klhdc7a	PREDICTED: Rattus norvegicus kelch domain containing 7A (Klhdc7a), transcript variant X3, mRNA [XM_006225586]
A_44_P1146029	0.029831337	down	3.1311755	-3.1311755	-1.6467043	LOC102547246	PREDICTED: Rattus norvegicus uncharacterized LOC102547246 (LOC102547246), ncRNA [XR_355286]
A_44_P1132071	8.4298756E-4	down	3.127442	-3.127442	-1.644983	LOC102546527	PREDICTED: Rattus norvegicus uncharacterized LOC102546527 (LOC102546527), ncRNA [XR_338868]
A_44_P335079	0.043411426	down	3.124412	-3.124412	-1.6435847	Tff3	Rattus norvegicus trefoil factor 3 (Tff3), mRNA [NM_013042]
A_44_P1124831	0.004761266	down	3.120388	-3.120388	-1.6417254	LOC102548247	PREDICTED: Rattus norvegicus uncharacterized LOC102548247 (LOC102548247), transcript variant X1, ncRNA [XR_353815]
A_44_P517258	0.016900295	up	3.1146488	3.1146488	1.6390694	Pck1	Rattus norvegicus phosphoenolpyruvate carboxykinase 1 (Pck1), mRNA [NM_198780]
A_44_P1105448	0.008660172	up	3.112836	3.112836	1.6382295	Plag1	PREDICTED: Rattus norvegicus PLAG1 zinc finger (Plag1), transcript variant X3, mRNA [XM_008763526]
A_44_P1104931	0.02200874	up	3.1120744	3.1120744	1.6378765
A_44_P1126731	0.033317074	down	3.1105046	-3.1105046	-1.6371486
A_44_P1362678	0.0067728	up	3.109129	3.109129	1.6365105
A_64_P029797	0.004799641	down	3.1041903	-3.1041903	-1.634217	Ddc	Rattus norvegicus dopa decarboxylase (Ddc), transcript variant 1, mRNA [NM_012545]
A_44_P242938	0.028602954	down	3.1028194	-3.1028194	-1.6335797	Ces2a	Rattus norvegicus carboxylesterase 2A (Ces2a), mRNA [NM_144743]
A_44_P1081480	0.042597484	up	3.1024256	3.1024256	1.6333966	Mafb	Rattus norvegicus MAF bZIP transcription factor B (Mafb), mRNA [NM_019316]
A_44_P299026	0.011947258	up	3.1016068	3.1016068	1.6330158		FQ145203 Rattus norvegicus 11-12 days foetus Sprague-Dawley Rattus norvegicus cDNA clone TL0ADA23YH20 3', mRNA sequence [FQ145203]
A_44_P551065	0.0023295584	down	3.10059	-3.10059	-1.6325427	Ly6al	Rattus norvegicus lymphocyte antigen 6 complex, locus A-like (Ly6al), mRNA [NM_001128099]
A_64_P139188	0.029349172	up	3.093317	3.093317	1.6291547	Krtap7-1	Rattus norvegicus keratin associated protein 7-1 (Krtap7-1), mRNA [NM_001145002]
A_64_P119567	0.0034083633	up	3.0928764	3.0928764	1.6289492	Pnpla7	Rattus norvegicus patatin-like phospholipase domain containing 7 (Pnpla7), mRNA [NM_144738]
A_44_P1156503	0.011615408	up	3.0867805	3.0867805	1.6261029	Ly49s6	Ly49 stimulatory receptor 6 [Source:RGD Symbol;Acc:1549735] [ENSRNOT00000079975]
A_64_P182654	0.0024213234	up	3.0841994	3.0841994	1.624896	Birc2	Rattus norvegicus baculoviral IAP repeat-containing 2 (Birc2), mRNA [NM_021752]
A_44_P1155497	0.0034676131	up	3.084074	3.084074	1.6248374	Cyp4a3	Rattus norvegicus cytochrome P450, family 4, subfamily a, polypeptide 3 (Cyp4a3), mRNA [NM_175760]
A_44_P1147595	0.0018097939	down	3.0819993	-3.0819993	-1.6238666	LOC102555240	PREDICTED: Rattus norvegicus uncharacterized LOC102555240 (LOC102555240), transcript variant X1, ncRNA [XR_357427]
A_44_P669616	0.001604944	up	3.0819616	3.0819616	1.6238489	Dact1	dishevelled-binding antagonist of beta-catenin 1 [Source:RGD Symbol;Acc:1564008] [ENSRNOT00000011466]
A_64_P038107	0.0027919402	down	3.0816703	-3.0816703	-1.6237125	Apobec1	Rattus norvegicus apolipoprotein B mRNA editing enzyme catalytic subunit 1 (Apobec1), mRNA [NM_012907]
A_44_P1124161	0.013032633	up	3.0798073	3.0798073	1.62284	LOC102555978	PREDICTED: Rattus norvegicus uncharacterized LOC102555978 (LOC102555978), transcript variant X2, ncRNA [XR_592215]
A_44_P1105687	0.0023781983	up	3.079762	3.079762	1.6228188	LOC103690035	PREDICTED: Rattus norvegicus TGF-beta receptor type-1-like (LOC103690035), transcript variant X1, mRNA [XM_008763706]
A_44_P212602	0.008120805	up	3.0730367	3.0730367	1.6196649	Olr232	Rattus norvegicus olfactory receptor 232 (Olr232), mRNA [NM_001001035]
A_44_P226315	0.013624917	up	3.072573	3.072573	1.6194472	Slc16a10	Rattus norvegicus solute carrier family 16 member 10 (Slc16a10), mRNA [NM_138831]
A_44_P1110688	0.01389077	up	3.0710058	3.0710058	1.6187112	RGD1563888	PREDICTED: Rattus norvegicus similar to DNA segment, Chr 16, ERATO Doi 472, expressed (RGD1563888), transcript variant X2, mRNA [XM_008768532]
A_44_P776390	0.004932466	up	3.070588	3.070588	1.618515	Kcnk5	Rattus norvegicus potassium two pore domain channel subfamily K member 5 (Kcnk5), mRNA [NM_001039516]
A_44_P1149979	0.0027314338	down	3.0700076	-3.0700076	-1.6182421	LOC103694055	PREDICTED: Rattus norvegicus uncharacterized LOC103694055 (LOC103694055), transcript variant X2, ncRNA [XR_001834237]
A_44_P1110503	0.033707917	up	3.069889	3.069889	1.6181865	Socs3	PREDICTED: Rattus norvegicus suppressor of cytokine signaling 3 (Socs3), transcript variant X1, mRNA [XM_008768398]
A_64_P047944	0.02997504	up	3.067251	3.067251	1.6169462	Cramp1	cramped chromatin regulator homolog 1 [Source:RGD Symbol;Acc:1311948] [ENSRNOT00000022050]
A_64_P058362	0.0121784415	up	3.0659344	3.0659344	1.6163268		cytochrome P450, family 3, subfamily a, polypeptide 85, pseudogene [Source:RGD Symbol;Acc:1595706] [ENSRNOT00000085436]
A_44_P1365459	0.0016764052	down	3.0626256	-3.0626256	-1.614769	LOC100364155	PREDICTED: Rattus norvegicus hypothetical LOC100364155 (LOC100364155), mRNA [XM_008765150]
A_44_P241929	0.024048453	down	3.0622709	-3.0622709	-1.6146019	Mad2l1	PREDICTED: Rattus norvegicus MAD2 mitotic arrest deficient-like 1 (yeast) (Mad2l1), transcript variant X1, mRNA [XM_006236619]
A_44_P1366684	0.0053129527	down	3.0578651	-3.0578651	-1.6125247	LOC684871	Rattus norvegicus similar to Protein C8orf4 (Thyroid cancer protein 1) (TC-1) (LOC684871), mRNA [NM_001115043]
A_64_P154297	0.015955444	down	3.0569673	-3.0569673	-1.6121011	Iqgap3	Rattus norvegicus IQ motif containing GTPase activating protein 3 (Iqgap3), mRNA [NM_001191709]
A_44_P1101774	0.0014966024	down	3.0566554	-3.0566554	-1.6119539	Tkfc	PREDICTED: Rattus norvegicus triokinase and FMN cyclase (Tkfc), transcript variant X2, mRNA [XM_006231056]
A_44_P1082069	0.0013647854	down	3.0557115	-3.0557115	-1.6115084	Dbi	Rattus norvegicus diazepam binding inhibitor, acyl-CoA binding protein (Dbi), mRNA [NM_031853]
A_44_P504221	0.003369126	up	3.0555162	3.0555162	1.6114161	Ccnt1	Rattus norvegicus cyclin T1 (Ccnt1), mRNA [NM_001108110]
A_44_P428467	0.0072791367	down	3.0554616	-3.0554616	-1.6113904	Homez	Rattus norvegicus homeobox and leucine zipper encoding (Homez), mRNA [NM_152849]
A_44_P166046	9.368157E-4	down	3.054521	-3.054521	-1.6109462	Tkfc	Rattus norvegicus triokinase and FMN cyclase (Tkfc), mRNA [NM_001039031]
A_44_P1111656	0.012537608	up	3.050133	3.050133	1.6088722	Hps4	PREDICTED: Rattus norvegicus Hermansky-Pudlak syndrome 4 (Hps4), transcript variant X6, mRNA [XM_006249546]
A_44_P1132046	0.03540765	up	3.050078	3.050078	1.6088461	LOC103695157	PREDICTED: Rattus norvegicus uncharacterized LOC103695157 (LOC103695157), ncRNA [XR_001840286]
A_64_P132852	0.016010989	up	3.048097	3.048097	1.6079087	Insc	Rattus norvegicus inscuteable homolog (Drosophila) (Insc), mRNA [NM_001106285]
A_64_P109531	0.010772067	up	3.04586	3.04586	1.6068497	Tgfb2	AF135598 transforming growth factor beta 2 precursor {Rattus norvegicus} (exp=-1; wgp=0; cg=0), partial (28%) [TC604178]
A_44_P691255	0.011869472	up	3.0449114	3.0449114	1.6064003		AGENCOURT_27549012 NIH_MGC_254 Rattus norvegicus cDNA clone IMAGE:7312934 5', mRNA sequence [CO396119]
A_44_P145390	0.020462612	down	3.0417485	-3.0417485	-1.6049008	LOC103692892	PREDICTED: Rattus norvegicus uncharacterized LOC103692892 (LOC103692892), transcript variant X3, ncRNA [XR_601801]
A_44_P1147026	0.009283689	up	3.0357842	3.0357842	1.6020693	LOC102548692	PREDICTED: Rattus norvegicus uncharacterized LOC102548692 (LOC102548692), transcript variant X2, ncRNA [XR_001839512]
A_44_P1364421	0.0011083519	up	3.0295625	3.0295625	1.5991094
A_44_P1129897	0.027623149	up	3.0272877	3.0272877	1.5980258
A_44_P896107	0.001082128	up	3.0229774	3.0229774	1.5959702	Ccdc117	Rattus norvegicus coiled-coil domain containing 117 (Ccdc117), mRNA [NM_001017502]
A_44_P1099769	0.0041778535	up	3.0209482	3.0209482	1.5950015		similar to spermatogenesis associated glutamate (E)-rich protein 4d [Source:RGD Symbol;Acc:1587222] [ENSRNOT00000075616]
A_44_P1125201	0.0021943003	down	3.0195203	-3.0195203	-1.5943193	LOC102546330	PREDICTED: Rattus norvegicus uncharacterized LOC102546330 (LOC102546330), transcript variant X2, ncRNA [XR_592506]
A_44_P239955	0.022079596	up	3.0162392	3.0162392	1.5927508		UI-R-C0-gu-b-05-0-UI.s1 UI-R-C0 Rattus norvegicus cDNA clone UI-R-C0-gu-b-05-0-UI 3', mRNA sequence [AA964011]
A_44_P1117474	0.0035723695	up	3.0145292	3.0145292	1.5919327
A_44_P1153339	0.0034953367	down	3.0077589	-3.0077589	-1.5886889		leucine rich repeat containing 74B [Source:RGD Symbol;Acc:2319134] [ENSRNOT00000002557]
A_44_P1109249	0.0071311602	up	3.0074775	3.0074775	1.5885539	Tns1	PREDICTED: Rattus norvegicus tensin 1 (Tns1), transcript variant X1, mRNA [XM_008767220]
A_42_P469136	0.0045663076	up	3.007371	3.007371	1.5885028	Kti12	Rattus norvegicus KTI12 chromatin associated homolog (Kti12), mRNA [NM_001044288]
A_44_P1148937	0.0012601563	up	3.0021055	3.0021055	1.5859747	LOC108352751	PREDICTED: Rattus norvegicus S-antigen protein-like (LOC108352751), mRNA [XM_017599469]
A_44_P234129	0.04536985	down	3.001649	-3.001649	-1.5857552	Dlgap5	Rattus norvegicus DLG associated protein 5 (Dlgap5), mRNA [NM_001135802]
A_44_P1119687	0.040480107	down	3.0003507	-3.0003507	-1.5851312
A_43_P19212	0.032621533	down	2.9997706	-2.9997706	-1.5848522	Tp53inp1	PREDICTED: Rattus norvegicus tumor protein p53 inducible nuclear protein 1 (Tp53inp1), transcript variant X4, mRNA [XM_017593226]
A_44_P1135552	0.023636635	up	2.9993682	2.9993682	1.5846586	LOC102554608	PREDICTED: Rattus norvegicus uncharacterized LOC102554608 (LOC102554608), ncRNA [XR_340519]
A_64_P162016	0.01626104	up	2.997229	2.997229	1.5836294	Kncn	kinocilin [Source:RGD Symbol;Acc:1584061] [ENSRNOT00000057061]
A_44_P1360542	0.003847286	down	2.9971626	-2.9971626	-1.5835973	Kif6	PREDICTED: Rattus norvegicus kinesin family member 6 (Kif6), transcript variant X1, mRNA [XM_006226706]
A_44_P1121672	0.0012328107	up	2.9935484	2.9935484	1.5818566	LOC103691771	PREDICTED: Rattus norvegicus uncharacterized LOC103691771 (LOC103691771), ncRNA [XR_591469]
A_44_P1360289	0.0046317647	up	2.9920065	2.9920065	1.5811133
A_44_P435604	0.0050914963	up	2.9910367	2.9910367	1.5806456	Atp1b1	Rattus norvegicus ATPase Na+/K+ transporting subunit beta 1 (Atp1b1), mRNA [NM_013113]
A_64_P021750	0.02415203	up	2.990841	2.990841	1.5805511	Cyp3a23-3a1	Rattus norvegicus cytochrome P450, family 3, subfamily a, polypeptide 23/polypeptide 1 (Cyp3a23/3a1), mRNA [NM_013105]
A_44_P1130349	0.02085665	down	2.987556	-2.987556	-1.5789658
A_64_P138641	0.03466695	down	2.986839	-2.986839	-1.5786195	Zfp472	Rattus norvegicus zinc finger protein 472 (Zfp472), mRNA [NM_182823]
A_64_P100051	0.030166436	down	2.985101	-2.985101	-1.5777798	Wnt3a	Rattus norvegicus wingless-type MMTV integration site family, member 3A (Wnt3a), mRNA [NM_001107005]
A_44_P1117854	0.04648786	up	2.9818363	2.9818363	1.5762011	LOC102557098	PREDICTED: Rattus norvegicus uncharacterized LOC102557098 (LOC102557098), transcript variant X3, ncRNA [XR_598816]
A_44_P1365848	0.0015166097	up	2.9793718	2.9793718	1.5750082		PREDICTED: Rattus norvegicus Crx opposite strand transcript 1 (Crxos1), mRNA [XM_006228340]
A_64_P072189	0.001325668	down	2.977223	-2.977223	-1.5739672	Mgat3	Rattus norvegicus mannosyl (beta-1,4-)-glycoprotein beta-1,4-N-acetylglucosaminyltransferase (Mgat3), mRNA [NM_019239]
A_44_P1150798	0.018941728	up	2.9766035	2.9766035	1.573667
A_44_P1360176	0.012904978	up	2.9726963	2.9726963	1.5717721
A_44_P1152725	0.00319784	up	2.9724581	2.9724581	1.5716565		Rattus norvegicus chromosome 7, 38 clones, strain BN/SsNHsdMCW RNOR03304553, whole genome shotgun sequence [AABR03055352]
A_44_P809228	0.044005882	down	2.9711277	-2.9711277	-1.5710106	LOC102555762	PREDICTED: Rattus norvegicus uncharacterized LOC102555762 (LOC102555762), ncRNA [XR_339321]
A_44_P1164356	0.003205434	up	2.9695573	2.9695573	1.5702479	Pnpla7	Q5BK26_RAT (Q5BK26) Ntel1 protein, complete [TC583814]
A_64_P075769	0.0018827283	down	2.9661422	-2.9661422	-1.5685878
A_44_P534635	0.018629197	up	2.956878	2.956878	1.5640746		dedicator of cytokinesis 4 [Source:RGD Symbol;Acc:1561724] [ENSRNOT00000006709]
A_64_P148873	0.045924935	up	2.9553597	2.9553597	1.5633337	Acvr1b	Rattus norvegicus activin A receptor type 1B (Acvr1b), mRNA [NM_199230]
A_44_P1094050	0.002249949	up	2.954289	2.954289	1.5628109	LOC102557053	PREDICTED: Rattus norvegicus uncharacterized LOC102557053 (LOC102557053), transcript variant X3, mRNA [XM_017603214]
A_64_P112406	0.01335156	up	2.9540653	2.9540653	1.5627017	Chac1	Rattus norvegicus ChaC glutathione-specific gamma-glutamylcyclotransferase 1 (Chac1), mRNA [NM_001173437]
A_44_P1043157	0.0010715658	down	2.9532232	-2.9532232	-1.5622904	Cxcl9	Rattus norvegicus C-X-C motif chemokine ligand 9 (Cxcl9), mRNA [NM_145672]
A_44_P1083762	0.0014650201	up	2.9521253	2.9521253	1.561754	Rad54l2	Rattus norvegicus RAD54-like 2 (S. cerevisiae) (Rad54l2), mRNA [NM_001134520]
A_44_P1100154	0.003435186	up	2.9512556	2.9512556	1.5613289
A_42_P736573	0.029640764	up	2.9511425	2.9511425	1.5612736	Pdk4	UI-R-C0-jp-f-11-0-UI.s1 UI-R-C0 Rattus norvegicus cDNA clone UI-R-C0-jp-f-11-0-UI 3', mRNA sequence [AI031053]
A_64_P108658	0.027676288	up	2.9496725	2.9496725	1.5605547	Nkd2	Rattus norvegicus naked cuticle homolog 2 (Nkd2), mRNA [NM_001107454]
A_44_P1124156	0.0073328055	up	2.9426603	2.9426603	1.557121	LOC102555860	PREDICTED: Rattus norvegicus uncharacterized LOC102555860 (LOC102555860), ncRNA [XR_345989]
A_44_P1118081	0.0076857773	up	2.9383912	2.9383912	1.5550264
A_44_P1094269	0.024377942	up	2.9349272	2.9349272	1.5533247
A_44_P1136212	0.0135134505	down	2.9330177	-2.9330177	-1.5523858	LOC102546462	PREDICTED: Rattus norvegicus uncharacterized LOC102546462 (LOC102546462), transcript variant X1, ncRNA [XR_360090]
A_42_P737307	0.033597045	down	2.932258	-2.932258	-1.552012	LOC100911719	PREDICTED: Rattus norvegicus uncharacterized LOC100911719 (LOC100911719), transcript variant X3, ncRNA [XR_339971]
A_44_P417729	0.0038523579	down	2.9300659	-2.9300659	-1.5509331		UI-R-E0-dn-e-05-0-UI.s1 UI-R-E0 Rattus norvegicus cDNA clone UI-R-E0-dn-e-05-0-UI 3', mRNA sequence [AA900765]
A_44_P388720	0.0030653866	down	2.9299471	-2.9299471	-1.5508746	Fstl3	follistatin like 3 [Source:RGD Symbol;Acc:621811] [ENSRNOT00000012578]
A_44_P1115000	0.0012326142	up	2.9275584	2.9275584	1.549698
A_64_P064371	0.025851386	up	2.926197	2.926197	1.5490268	Spata2L	Rattus norvegicus spermatogenesis associated 2-like (Spata2L), mRNA [NM_001109133]
A_44_P464330	0.0076503907	up	2.921726	2.921726	1.5468209	RGD1304963	similar to hypothetical protein MGC38716 [Source:RGD Symbol;Acc:1304963] [ENSRNOT00000011832]
A_64_P056698	0.0014005793	up	2.919943	2.919943	1.5459403	Pom121l2	Rattus norvegicus POM121 transmembrane nucleoporin-like 2 (Pom121l2), transcript variant 2, mRNA [NM_001162931]
A_64_P116219	0.005413495	up	2.9192863	2.9192863	1.5456157	Crat	Rattus norvegicus carnitine O-acetyltransferase (Crat), mRNA [NM_001004085]
A_44_P704483	0.0050294544	up	2.9186823	2.9186823	1.5453172	Slc22a5	up-regulator of carnitine transporter, OCTN2 [Source:RGD Symbol;Acc:1561735] [ENSRNOT00000041253]
A_44_P1140055	0.019720364	down	2.913496	-2.913496	-1.5427513
A_44_P1143629	0.005064142	up	2.9128504	2.9128504	1.5424316	Phtf1	PREDICTED: Rattus norvegicus putative homeodomain transcription factor 1 (Phtf1), transcript variant X2, mRNA [XM_006233063]
A_64_P243897	0.004430938	down	2.9123695	-2.9123695	-1.5421934	Phf11	Rattus norvegicus PHD finger protein 11 (Phf11), mRNA [NM_001024272]
A_64_P012739	0.0054088724	down	2.9116342	-2.9116342	-1.5418291	Zfp955a	Rattus norvegicus zinc finger protein 955A (Zfp955a), mRNA [NM_001126281]
A_64_P001249	0.013916117	up	2.9098322	2.9098322	1.540936	Chrnb2	Rattus norvegicus cholinergic receptor nicotinic beta 2 subunit (Chrnb2), mRNA [NM_019297]
A_44_P1106342	0.0033542165	down	2.9000556	-2.9000556	-1.5360806	LOC691254	hypothetical protein LOC691254 [Source:RGD Symbol;Acc:1586256] [ENSRNOT00000045406]
A_44_P1088601	0.004152633	down	2.8992283	-2.8992283	-1.535669	Olr837	Rattus norvegicus olfactory receptor 837 (Olr837), mRNA [NM_001000897]
A_44_P1153509	0.042708524	down	2.8991446	-2.8991446	-1.5356272	Edar	ectodysplasin-A receptor [Source:RGD Symbol;Acc:1561714] [ENSRNOT00000030348]
A_64_P056415	0.001327014	up	2.8976426	2.8976426	1.5348797	Cyp2j4	Rattus norvegicus cytochrome P450, family 2, subfamily j, polypeptide 4 (Cyp2j4), mRNA [NM_023025]
A_44_P1103855	0.0016829437	up	2.8955915	2.8955915	1.5338581	Mapkbp1	mitogen activated protein kinase binding protein 1 [Source:RGD Symbol;Acc:1307578] [ENSRNOT00000009430]
A_44_P1141703	0.0057046064	up	2.8950963	2.8950963	1.5336113	LOC108349381	PREDICTED: Rattus norvegicus uncharacterized LOC108349381 (LOC108349381), ncRNA [XR_001835298]
A_64_P033006	0.0013973312	down	2.8937066	-2.8937066	-1.5329186	RGD1563748	similar to ankyrin-like protein [Source:RGD Symbol;Acc:1563748] [ENSRNOT00000078734]
A_44_P488956	0.0013204836	down	2.892467	-2.892467	-1.5323005	Marveld1	Rattus norvegicus MARVEL domain containing 1 (Marveld1), mRNA [NM_001107590]
A_44_P1162985	0.0069143195	up	2.8880827	2.8880827	1.530112	Bbs2	Rattus norvegicus Bardet-Biedl syndrome 2 (Bbs2), mRNA [NM_053618]
A_64_P149899	0.007867723	down	2.8852475	-2.8852475	-1.528695	Fbxl8	Rattus norvegicus F-box and leucine-rich repeat protein 8 (Fbxl8), mRNA [NM_001109128]
A_44_P517419	0.008949066	down	2.8811407	-2.8811407	-1.52664	Hlf	PREDICTED: Rattus norvegicus HLF, PAR bZIP transcription factor (Hlf), transcript variant X1, mRNA [XM_006220780]
A_64_P158073	0.027513824	down	2.877671	-2.877671	-1.5249016	Espl1	Rattus norvegicus extra spindle pole bodies like 1, separase (Espl1), mRNA [NM_001170602]
A_44_P577233	0.014657663	up	2.8761973	2.8761973	1.5241627	Tshz3	Rattus norvegicus teashirt zinc finger homeobox 3 (Tshz3), mRNA [NM_001107506]
A_44_P1128877	0.040527146	up	2.876173	2.876173	1.5241505	LOC102552775	PREDICTED: Rattus norvegicus uncharacterized LOC102552775 (LOC102552775), ncRNA [XR_348282]
A_44_P1047467	0.0027200591	up	2.876098	2.876098	1.5241128	Igf2bp2	Rattus norvegicus insulin-like growth factor 2 mRNA binding protein 2 (Igf2bp2), transcript variant 1, mRNA [NM_001270598]
A_44_P1158905	0.004040015	up	2.8753889	2.8753889	1.5237571	LOC100910172	PREDICTED: Rattus norvegicus brain acid soluble protein 1-like (LOC100910172), mRNA [XM_003750615]
A_44_P456599	0.008328319	up	2.875299	2.875299	1.5237119	Zdhhc23	zinc finger, DHHC-type containing 23 [Source:RGD Symbol;Acc:1303254] [ENSRNOT00000093325]
A_44_P1132302	0.0035807914	up	2.872986	2.872986	1.522551	LOC108352161	PREDICTED: Rattus norvegicus uncharacterized LOC108352161 (LOC108352161), ncRNA [XR_001840337]
A_64_P038532	0.0025537296	up	2.8673973	2.8673973	1.5197418	Hps4	Rattus norvegicus Hermansky-Pudlak syndrome 4 (Hps4), mRNA [NM_001107148]
A_44_P1149246	0.0016182871	down	2.866424	-2.866424	-1.5192521	LOC103693373	PREDICTED: Rattus norvegicus uncharacterized LOC103693373 (LOC103693373), ncRNA [XR_596086]
A_44_P300506	0.005248423	down	2.8647094	-2.8647094	-1.5183887	Calr	Rattus norvegicus calreticulin (Calr), mRNA [NM_022399]
A_44_P1161080	0.009705253	down	2.8602872	-2.8602872	-1.51616	Nat8f3	PREDICTED: Rattus norvegicus N-acetyltransferase 8 (GCN5-related) family member 3 (Nat8f3), mRNA [XM_006236798]
A_44_P1083023	0.01194008	down	2.857887	-2.857887	-1.5149488	Rdh11	Rattus norvegicus retinol dehydrogenase 11 (all-trans/9-cis/11-cis) (Rdh11), mRNA [NM_001012193]
A_44_P385076	0.04686789	up	2.8557506	2.8557506	1.51387		UI-R-E0-de-f-04-0-UI.s2 UI-R-E0 Rattus norvegicus cDNA clone UI-R-E0-de-f-04-0-UI 3', mRNA sequence [AA900253]
A_44_P1096944	0.013996596	up	2.8554165	2.8554165	1.5137012	Dnah14	PREDICTED: Rattus norvegicus similar to Dynein heavy chain at 16F CG7092-PA (LOC690288), transcript variant X3, mRNA [XM_017604663]
A_44_P622172	0.032730147	up	2.850549	2.850549	1.5112398	Epn2	Rattus norvegicus epsin 2 (Epn2), transcript variant 2, mRNA [NM_001033914]
A_44_P962266	0.016898138	down	2.8504496	-2.8504496	-1.5111895	Ppp1r9a	PREDICTED: Rattus norvegicus protein phosphatase 1, regulatory subunit 9A (Ppp1r9a), transcript variant X2, mRNA [XM_006236058]
A_44_P402070	0.008988334	down	2.847976	-2.847976	-1.5099369		704185277J1 RACCUNL02 Rattus norvegicus cDNA clone 704185277 3', mRNA sequence [CK228798]
A_44_P1161805	0.00481572	down	2.8440738	-2.8440738	-1.5079589	Cenpk	PREDICTED: Rattus norvegicus centromere protein K (Cenpk), transcript variant X2, mRNA [XM_006231889]
A_44_P1119149	0.005691622	up	2.8426087	2.8426087	1.5072155
A_44_P548241	0.0012358199	down	2.8421676	-2.8421676	-1.5069916	Zfp51	Rattus norvegicus zinc finger protein 51 (Zfp51), mRNA [NM_001107467]
A_43_P10065	0.0026499315	up	2.8419962	2.8419962	1.5069046	Etnk1	Rattus norvegicus ethanolamine kinase 1 (Etnk1), mRNA [NM_001107894]
A_44_P566856	0.008767616	up	2.840781	2.840781	1.5062876
A_43_P14036	0.006824385	down	2.8385584	-2.8385584	-1.5051584	Ifi27l2b	Rattus norvegicus interferon, alpha-inducible protein 27 like 2B (Ifi27l2b), mRNA [NM_206846]
A_44_P1103212	0.0018660395	up	2.8383567	2.8383567	1.5050559	Etnppl	ethanolamine-phosphate phospho-lyase [Source:RGD Symbol;Acc:1590098] [ENSRNOT00000074209]
A_44_P1091536	0.00782349	up	2.8378117	2.8378117	1.5047789	Lipo1	lipase, member O1 [Source:RGD Symbol;Acc:1565682] [ENSRNOT00000035013]
A_44_P1154380	0.01978648	up	2.835734	2.835734	1.5037222	Palm2	Rattus norvegicus paralemmin 2 (Palm2), mRNA [NM_001305995]
A_44_P1146369	0.03323192	up	2.835179	2.835179	1.5034399	LOC102548035	PREDICTED: Rattus norvegicus uncharacterized LOC102548035 (LOC102548035), transcript variant X3, ncRNA [XR_001838950]
A_44_P1366541	0.02219619	up	2.8344913	2.8344913	1.5030898
A_44_P545193	0.009555609	down	2.8328435	-2.8328435	-1.5022509	Hsd11b2	Rattus norvegicus hydroxysteroid 11-beta dehydrogenase 2 (Hsd11b2), mRNA [NM_017081]
A_43_P21781	0.006085687	down	2.8277552	-2.8277552	-1.4996573	Cmss1	Rattus norvegicus cms1 ribosomal small subunit homolog (yeast) (Cmss1), mRNA [NM_001013866]
A_44_P1118857	0.0028229172	up	2.825924	2.825924	1.4987226	LOC103691276	PREDICTED: Rattus norvegicus uncharacterized LOC103691276 (LOC103691276), ncRNA [XR_001845442]
A_44_P1364981	0.0035481239	down	2.8240576	-2.8240576	-1.4977695
A_44_P837271	0.023199702	down	2.8236563	-2.8236563	-1.4975644		zinc finger protein 69 [Source:RGD Symbol;Acc:2322990] [ENSRNOT00000030016]
A_64_P110891	0.023105986	down	2.8211718	-2.8211718	-1.4962945	Sdr16c6	Rattus norvegicus short chain dehydrogenase/reductase family 16C, member 6 (Sdr16c6), mRNA [NM_001109356]
A_44_P1119312	0.012838495	up	2.8211024	2.8211024	1.496259	LOC103691369	PREDICTED: Rattus norvegicus uncharacterized LOC103691369 (LOC103691369), ncRNA [XR_590710]
A_64_P052878	0.0018921032	up	2.8199925	2.8199925	1.4956913	Ildr2	PREDICTED: Rattus norvegicus immunoglobulin-like domain containing receptor 2 (Ildr2), transcript variant X13, mRNA [XM_002724859]
A_44_P1081362	0.042395264	up	2.8195853	2.8195853	1.4954829	Oxct2a	Rattus norvegicus 3-oxoacid CoA transferase 2A (Oxct2a), mRNA [NM_001012221]
A_44_P863419	0.013282475	down	2.8187613	-2.8187613	-1.4950613		UI-R-FJ0-cqc-m-15-0-UI.s1 UI-R-FJ0 Rattus norvegicus cDNA clone UI-R-FJ0-cqc-m-15-0-UI 3', mRNA sequence [CA506720]
A_44_P1092952	0.012416113	up	2.8168569	2.8168569	1.4940863	LOC102554398	PREDICTED: Rattus norvegicus uncharacterized LOC102554398 (LOC102554398), transcript variant X3, mRNA [XM_008775645]
A_42_P654865	0.0025525733	down	2.8155463	-2.8155463	-1.4934149	Otub2	Rattus norvegicus OTU deubiquitinase, ubiquitin aldehyde binding 2 (Otub2), mRNA [NM_001108053]
A_44_P1099420	0.019661816	up	2.815079	2.815079	1.4931754	Nostrin	PREDICTED: Rattus norvegicus nitric oxide synthase trafficking (Nostrin), transcript variant X1, partial mRNA [XM_008758324]
A_44_P1156702	0.039045516	up	2.813981	2.813981	1.4926126	Ctdspl	Rattus norvegicus CTD small phosphatase like (Ctdspl), mRNA [NM_001106865]
A_44_P1362421	0.0042936583	up	2.813291	2.813291	1.4922588
A_44_P103337	0.0020557719	down	2.8125098	-2.8125098	-1.4918581	FAM187A	Rattus norvegicus family with sequence similarity 187, member A (FAM187A), mRNA [NM_001013861]
A_44_P1096499	0.011391829	up	2.81241	2.81241	1.491807
A_44_P1112562	0.0014637772	up	2.811278	2.811278	1.4912262	Slc4a4	PREDICTED: Rattus norvegicus solute carrier family 4 member 4 (Slc4a4), transcript variant X2, mRNA [XM_006250791]
A_44_P513114	0.00520655	up	2.810005	2.810005	1.4905727	Trim3	Rattus norvegicus tripartite motif-containing 3 (Trim3), mRNA [NM_031786]
A_44_P1125146	0.008458702	up	2.8098893	2.8098893	1.4905133	LOC102547621	PREDICTED: Rattus norvegicus uncharacterized LOC102547621 (LOC102547621), transcript variant X1, ncRNA [XR_001843645]
A_44_P1142872	0.030836359	up	2.8066454	2.8066454	1.4888468
A_64_P033121	0.019941239	up	2.80615	2.80615	1.488592	Rasa4	RAS p21 protein activator 4 [Source:RGD Symbol;Acc:1565457] [ENSRNOT00000001943]
A_44_P1154122	0.0045404076	up	2.8051043	2.8051043	1.4880544	Mef2c	myocyte enhancer factor 2C [Source:RGD Symbol;Acc:1563119] [ENSRNOT00000076408]
A_44_P1122718	0.018024957	up	2.8021734	2.8021734	1.4865462	LOC102555661	PREDICTED: Rattus norvegicus uncharacterized LOC102555661 (LOC102555661), transcript variant X2, ncRNA [XR_600412]
A_43_P19145	0.0070571415	down	2.8014424	-2.8014424	-1.4861698	Fam213a	Rattus norvegicus family with sequence similarity 213, member A (Fam213a), mRNA [NM_001014140]
A_44_P1118006	0.013180115	up	2.7994041	2.7994041	1.4851198	LOC102546835	PREDICTED: Rattus norvegicus uncharacterized LOC102546835 (LOC102546835), transcript variant X22, ncRNA [XR_001835373]
A_44_P1136921	0.0034036394	up	2.798746	2.798746	1.4847806	LOC102548526	PREDICTED: Rattus norvegicus uncharacterized LOC102548526 (LOC102548526), transcript variant X5, ncRNA [XR_596987]
A_64_P066172	0.0015721921	up	2.7982812	2.7982812	1.4845409		EF-hand calcium binding domain 8 [Source:MGI Symbol;Acc:MGI:3644206] [ENSRNOT00000038684]
A_44_P1117687	0.031716827	up	2.796507	2.796507	1.4836259	LOC102557527	PREDICTED: Rattus norvegicus uncharacterized LOC102557527 (LOC102557527), ncRNA [XR_342833]
A_44_P700958	0.002243704	down	2.796492	-2.796492	-1.4836183	Uggt1	UDP-glucose glycoprotein glucosyltransferase 1 [Source:RGD Symbol;Acc:619710] [ENSRNOT00000020558]
A_44_P1164576	0.0038133424	up	2.796266	2.796266	1.4835017	Adcyap1r1	Rattus norvegicus adenylate cyclase activating polypeptide 1 receptor type 1 (Adcyap1r1), transcript variant 1, mRNA [NM_001270579]
A_44_P1366813	0.04459828	up	2.7959878	2.7959878	1.483358
A_43_P13029	0.0023885143	down	2.7932858	-2.7932858	-1.4819632	Acsl3	Rattus norvegicus acyl-CoA synthetase long-chain family member 3 (Acsl3), mRNA [NM_057107]
A_44_P1134136	0.0070525957	up	2.7930982	2.7930982	1.4818662	LOC102553073	PREDICTED: Rattus norvegicus uncharacterized LOC102553073 (LOC102553073), ncRNA [XR_359005]
A_44_P208857	0.016321342	down	2.7923503	-2.7923503	-1.4814799	Mlc1	Rattus norvegicus megalencephalic leukoencephalopathy with subcortical cysts 1 (Mlc1), mRNA [NM_001108105]
A_44_P1117502	0.0055096364	up	2.790196	2.790196	1.4803665	LOC102550953	PREDICTED: Rattus norvegicus uncharacterized LOC102550953 (LOC102550953), ncRNA [XR_342718]
A_64_P065736	0.010160915	up	2.7896593	2.7896593	1.480089	Slc7a2	Rattus norvegicus solute carrier family 7 member 2 (Slc7a2), transcript variant 2, mRNA [NM_001134686]
A_64_P005997	0.013388507	up	2.7883449	2.7883449	1.479409	Pdzrn3	Rattus norvegicus PDZ domain containing RING finger 3 (Pdzrn3), mRNA [NM_001271251]
A_44_P267199	0.008939603	down	2.7811263	-2.7811263	-1.4756693	Spred3	Rattus norvegicus sprouty-related, EVH1 domain containing 3 (Spred3), mRNA [NM_001173344]
A_44_P1149994	0.028679535	up	2.7805362	2.7805362	1.4753631
A_64_P005501	0.0021730883	up	2.7795184	2.7795184	1.4748349	Evx1	Rattus norvegicus even-skipped homeobox 1 (Evx1), mRNA [NM_001191972]
A_44_P1107093	0.04335686	up	2.778934	2.778934	1.4745315	Slc39a5	Rattus norvegicus solute carrier family 39 member 5 (Slc39a5), mRNA [NM_001108728]
A_44_P1102168	0.007995179	up	2.7780833	2.7780833	1.4740899	Fam172a	PREDICTED: Rattus norvegicus family with sequence similarity 172, member A (Fam172a), transcript variant X1, mRNA [XM_008760623]
A_44_P479359	0.0017267255	down	2.777223	-2.777223	-1.4736431	Mvk	Rattus norvegicus mevalonate kinase (Mvk), mRNA [NM_031063]
A_44_P1101416	0.017517261	down	2.7766366	-2.7766366	-1.4733384	LOC102548360	PREDICTED: Rattus norvegicus MLV-related proviral Env polyprotein-like (LOC102548360), mRNA [XM_008775623]
A_44_P1368861	0.0031186626	down	2.7734241	-2.7734241	-1.4716682		pseudogene for diazepam binding inhibitor 1 [Source:RGD Symbol;Acc:1564239] [ENSRNOT00000025907]
A_44_P1366417	0.0055336663	up	2.772471	2.772471	1.4711723
A_43_P12942	0.049883664	up	2.771191	2.771191	1.4705061	Nrxn3	Rattus norvegicus neurexin 3 (Nrxn3), mRNA [NM_053817]
A_44_P1099555	0.02474498	up	28157	1977-02-01	1.4370679
A_44_P1113353	0.025139295	down	2.7691636	-2.7691636	-1.4694502	LOC102549509	PREDICTED: Rattus norvegicus MLV-related proviral Env polyprotein-like (LOC102549509), transcript variant X1, mRNA [XM_017595951]
A_64_P153045	0.021691794	down	2.7691076	-2.7691076	-1.469421	Abcc8	Rattus norvegicus ATP binding cassette subfamily C member 8 (Abcc8), mRNA [NM_013039]
A_64_P018726	0.0018094307	up	2.768926	2.768926	1.4693264	Bnip3	Rattus norvegicus BCL2 interacting protein 3 (Bnip3), mRNA [NM_053420]
A_44_P1159383	0.0053802743	up	2.7655337	2.7655337	1.4675579	Crem	Rattus norvegicus cAMP responsive element modulator (Crem), transcript variant 9, mRNA [NM_001271248]
A_44_P306507	0.022526233	up	2.7649403	2.7649403	1.4672483	Higd1a	Rattus norvegicus HIG1 hypoxia inducible domain family, member 1A (Higd1a), mRNA [NM_080902]
A_42_P743682	0.013010715	down	2.764284	-2.764284	-1.4669057	Lgals2	Rattus norvegicus galectin 2 (Lgals2), mRNA [NM_133599]
A_44_P1114137	0.012460126	up	2.7612615	2.7612615	1.4653275
A_44_P1091820	0.0019154799	down	2.7601032	-2.7601032	-1.4647222
A_64_P106181	0.008645446	up	2.7586029	2.7586029	1.4639378	Vwa8	PREDICTED: Rattus norvegicus von Willebrand factor A domain containing 8 (Vwa8), transcript variant X3, mRNA [XM_017599917]
A_44_P1117140	0.0037622117	up	2.7568762	2.7568762	1.4630345
A_64_P122726	0.0025744943	down	2.7556217	-2.7556217	-1.4623778	Katnbl1	Rattus norvegicus katanin regulatory subunit B1 like 1 (Katnbl1), mRNA [NM_001109645]
A_44_P241018	0.002049357	up	2.754462	2.754462	1.4617705	Ireb2	Rattus norvegicus iron responsive element binding protein 2 (Ireb2), mRNA [NM_022863]
A_44_P1087048	0.022883762	up	2.7542753	2.7542753	1.4616728	Gde1	Rattus norvegicus glycerophosphodiester phosphodiesterase 1 (Gde1), mRNA [NM_032615]
A_44_P1092806	0.013187702	up	2.7533631	2.7533631	1.4611949	Efcab8	PREDICTED: Rattus norvegicus EF-hand calcium binding domain 8 (Efcab8), transcript variant X3, mRNA [XM_008762402]
A_64_P123603	0.0017821252	up	2.7527153	2.7527153	1.4608554	Mt1	Rattus norvegicus metallothionein 1 (Mt1), mRNA [NM_138826]
A_42_P753215	0.027849361	down	2.7512674	-2.7512674	-1.4600964	Synj2	Rattus norvegicus synaptojanin 2 (Synj2), transcript variant 3, mRNA [NM_032071]
A_44_P1085711	0.008157786	up	2.7489069	2.7489069	1.458858	Suv39h2	Rattus norvegicus suppressor of variegation 3-9 homolog 2 (Suv39h2), mRNA [NM_001108883]
A_44_P1129673	0.0058402773	up	2.7487211	2.7487211	1.4587605	LOC102549114	PREDICTED: Rattus norvegicus uncharacterized LOC102549114 (LOC102549114), ncRNA [XR_348617]
A_43_P16459	0.034960277	up	2.7470787	2.7470787	1.4578983		UI-R-BS2-bdz-e-10-0-UI.s1 UI-R-BS2 Rattus norvegicus cDNA clone UI-R-BS2-bdz-e-10-0-UI 3', mRNA sequence [BF396562]
A_44_P291626	0.015351842	down	2.7466962	-2.7466962	-1.4576974		AMGNNUC:NRHY5-00261-G4-A W Rat hypothalamus (10471) Rattus norvegicus cDNA clone nrhy5-00261-g4 5', mRNA sequence [CB585728]
A_44_P1097183	0.004229302	down	2.7447886	-2.7447886	-1.4566951	Cep68	PREDICTED: Rattus norvegicus centrosomal protein 68 (Cep68), transcript variant X2, mRNA [XM_001059836]
A_44_P762003	0.014169621	up	2.7442462	2.7442462	1.4564099	Amigo1	adhesion molecule with Ig like domain 1 [Source:RGD Symbol;Acc:1303079] [ENSRNOT00000074725]
A_64_P132856	0.010303654	down	2.7437165	-2.7437165	-1.4561313	Lhx8	Rattus norvegicus LIM homeobox 8 (Lhx8), mRNA [NM_001012219]
A_44_P1111321	0.008392826	up	2.7436168	2.7436168	1.456079	Cyp3a85-ps	PREDICTED: Rattus norvegicus cytochrome P450, family 3, subfamily a, polypeptide 85, pseudogene (Cyp3a85-ps), mRNA [XM_008759136]
A_44_P1102423	0.0048799166	down	2.7430482	-2.7430482	-1.4557799	Car3	PREDICTED: Rattus norvegicus carbonic anhydrase 3 (Car3), transcript variant X1, mRNA [XM_006232116]
A_44_P1114595	0.003105996	up	2.7386847	2.7386847	1.4534831
A_64_P031610	0.0051370836	down	2.7384582	-2.7384582	-1.4533638		similar to RIKEN cDNA 5830475I06 [Source:RGD Symbol;Acc:1311744] [ENSRNOT00000036054]
A_44_P1099565	0.0079907775	down	2.7319255	-2.7319255	-1.4499182	LOC100910187	PREDICTED: Rattus norvegicus olfactory receptor 8D2-like (LOC100910187), mRNA [XM_008758110]
A_44_P1091939	0.007853805	up	2.7301295	2.7301295	1.4489694	LOC100363110	PREDICTED: Rattus norvegicus thioredoxin-like 4 (LOC100363110), transcript variant X4, mRNA [XM_008775112]
A_43_P13409	0.004608144	down	2.7299829	-2.7299829	-1.4488919	Zdhhc2	Rattus norvegicus zinc finger, DHHC-type containing 2 (Zdhhc2), mRNA [NM_145096]
A_64_P162940	0.010593241	up	2.7283394	2.7283394	1.4480231	Crxos1	PREDICTED: Rattus norvegicus Crx opposite strand transcript 1 (Crxos1), mRNA [XM_006228340]
A_44_P1083747	0.009761114	up	2.7275739	2.7275739	1.4476182	Tfap2a	Rattus norvegicus transcription factor AP-2 alpha (Tfap2a), mRNA [NM_001107345]
A_44_P1085427	0.0025810148	down	2.7262871	-2.7262871	-1.4469374	Ccne2	Rattus norvegicus cyclin E2 (Ccne2), mRNA [NM_001108656]
A_64_P027787	0.0026279448	down	2.726241	-2.726241	-1.4469131
A_44_P1094035	0.00432738	up	2.7254164	2.7254164	1.4464767	Greb1	growth regulation by estrogen in breast cancer 1 [Source:RGD Symbol;Acc:1564091] [ENSRNOT00000032417]
A_44_P1090101	0.0033697353	up	2.7236185	2.7236185	1.4455246	Nrip1	Rattus norvegicus nuclear receptor interacting protein 1 (Nrip1), mRNA [NM_001100560]
A_64_P162301	0.0017383386	up	2.7235043	2.7235043	1.4454641	Impact	Rattus norvegicus impact RWD domain protein (Impact), mRNA [NM_001012235]
A_64_P060754	0.01919272	up	2.7212677	2.7212677	1.4442788	Amph	Rattus norvegicus amphiphysin (Amph), mRNA [NM_022217]
A_42_P636189	0.011665683	down	2.719874	-2.719874	-1.4435397	Rps6ka6	ribosomal protein S6 kinase A6 [Source:RGD Symbol;Acc:1560817] [ENSRNOT00000081625]
A_44_P508386	0.01169401	up	2.7180412	2.7180412	1.4425673	Cyp17a1	Rattus norvegicus cytochrome P450, family 17, subfamily a, polypeptide 1 (Cyp17a1), mRNA [NM_012753]
A_44_P428575	0.0022260374	down	2.7160683	-2.7160683	-1.4415197	LOC301444	PREDICTED: Rattus norvegicus pseudogene for diazepam binding inhibitor 1 (LOC301444), misc_RNA [XR_001844937]
A_44_P1144106	0.013303431	up	2.7157414	2.7157414	1.441346	LOC691675	PREDICTED: Rattus norvegicus similar to NADH dehydrogenase (ubiquinone) 1 beta subcomplex, 4, 15kDa (LOC691675), misc_RNA [XR_591640]
A_42_P794562	0.004472422	down	2.7118568	-2.7118568	-1.439281	Cyp7a1	Rattus norvegicus cytochrome P450, family 7, subfamily a, polypeptide 1 (Cyp7a1), mRNA [NM_012942]
A_44_P1136903	0.0016384505	down	2.711708	-2.711708	-1.4392018	LOC102548002	PREDICTED: Rattus norvegicus uncharacterized LOC102548002 (LOC102548002), ncRNA [XR_341071]
A_64_P273738	0.020128164	up	2.7112796	2.7112796	1.4389739
A_42_P641234	0.042233177	down	2.7090993	-2.7090993	-1.4378133	Snrpa	Rattus norvegicus small nuclear ribonucleoprotein polypeptide A (Snrpa), mRNA [NM_001008303]
A_44_P1111276	0.0055691227	up	2.708683	2.708683	1.4375916	LOC100910196	PREDICTED: Rattus norvegicus katanin p60 ATPase-containing subunit A-like 1-like (LOC100910196), transcript variant X1, mRNA [XM_006248828]
A_44_P220256	0.010414373	down	2.7065966	-2.7065966	-1.4364799	Prtfdc1	Rattus norvegicus phosphoribosyl transferase domain containing 1 (Prtfdc1), mRNA [NM_001106127]
A_44_P1112447	0.014935921	up	2.7062633	2.7062633	1.4363022
A_44_P1133362	0.021586468	up	2.7058742	2.7058742	1.4360948	Cyp3a23/3a1	Rattus norvegicus cytochrome P450, family 3, subfamily a, polypeptide 23/polypeptide 1 (Cyp3a23/3a1), mRNA [NM_013105]
A_44_P813150	0.014992781	up	2.7057652	2.7057652	1.4360367	Cfdp1	craniofacial development protein 1 [Source:RGD Symbol;Acc:735080] [ENSRNOT00000089873]
A_64_P032242	0.011092905	up	2.70575	2.70575	1.4360285		vomeronasal 1 receptor A14 [Source:RGD Symbol;Acc:1359628] [ENSRNOT00000088379]
A_44_P522047	0.010906371	down	2.7003095	-2.7003095	-1.4331248	LOC684871	Rattus norvegicus similar to Protein C8orf4 (Thyroid cancer protein 1) (TC-1) (LOC684871), mRNA [NM_001115043]
A_44_P1093042	0.0018805659	down	2.6917803	-2.6917803	-1.4285606	LOC100912416	PREDICTED: Rattus norvegicus protein FAM115C-like (LOC100912416), transcript variant X2, mRNA [XM_017602785]
A_44_P1102693	0.033977017	down	2.6907408	-2.6907408	-1.4280034	Veph1	Rattus norvegicus ventricular zone expressed PH domain-containing 1 (Veph1), mRNA [NM_001014171]
A_44_P1093316	0.023986794	up	2.689646	2.689646	1.4274163
A_42_P577421	0.012683026	up	2.6895225	2.6895225	1.42735	Nnmt	Rattus norvegicus nicotinamide N-methyltransferase (Nnmt), mRNA [NM_001106819]
A_44_P175364	0.0400384	up	2.6888251	2.6888251	1.426976	Mafb	Rattus norvegicus MAF bZIP transcription factor B (Mafb), mRNA [NM_019316]
A_44_P1125821	0.02275004	up	2.6880121	2.6880121	1.4265397	LOC102552931	PREDICTED: Rattus norvegicus uncharacterized LOC102552931 (LOC102552931), ncRNA [XR_346819]
A_44_P358194	0.017821942	up	2.6864522	2.6864522	1.4257021	Fmo3	Rattus norvegicus flavin containing monooxygenase 3 (Fmo3), mRNA [NM_053433]
A_44_P1007933	0.00848258	up	2.6850789	2.6850789	1.4249644	Gabarapl1	Rattus norvegicus GABA type A receptor associated protein like 1 (Gabarapl1), mRNA [NM_001044294]
A_44_P111816	0.007166322	down	2.6839852	-2.6839852	-1.4243767	Adcy4	Rattus norvegicus adenylate cyclase 4 (Adcy4), mRNA [NM_019285]
A_44_P1130754	0.007268102	up	2.6839333	2.6839333	1.4243488
A_64_P142026	0.0075371694	down	2.6834373	-2.6834373	-1.4240822	Npy4r	Rattus norvegicus neuropeptide Y receptor Y4 (Npy4r), mRNA [NM_031581]
A_44_P1106607	0.016515406	up	2.6832902	2.6832902	1.4240031	Lpin1	PREDICTED: Rattus norvegicus lipin 1 (Lpin1), transcript variant X1, mRNA [XM_008764593]
A_44_P359032	0.003821712	up	2.6832247	2.6832247	1.4239678	Pink1	Rattus norvegicus PTEN induced putative kinase 1 (Pink1), mRNA [NM_001106694]
A_44_P1105952	0.033813693	up	2.6824794	2.6824794	1.423567	Cyp4a8	Rattus norvegicus cytochrome P450, family 4, subfamily a, polypeptide 8 (Cyp4a8), mRNA [NM_031605]
A_44_P1141994	0.0038118798	down	2.6813114	-2.6813114	-1.4229387	LOC103690979	PREDICTED: Rattus norvegicus uncharacterized LOC103690979 (LOC103690979), ncRNA [XR_589949]
A_44_P669323	0.013069392	up	2.68048	2.68048	1.4224913	LOC103691929	PREDICTED: Rattus norvegicus zinc finger protein OZF-like (LOC103691929), misc_RNA [XR_001843104]
A_44_P395483	0.030625816	up	2.677574	2.677574	1.4209263		UI-R-BJ2-bqv-e-09-0-UI.s10 UI-R-BJ2 Rattus norvegicus cDNA clone UI-R-BJ2-bqv-e-09-0-UI 3', mRNA sequence [CK843871]
A_44_P670239	0.004798174	down	2.6774538	-2.6774538	-1.4208616	Dusp18	Rattus norvegicus dual specificity phosphatase 18 (Dusp18), mRNA [NM_001013128]
A_44_P1137795	0.017512469	up	2.6772966	2.6772966	1.420777	LOC102554492	PREDICTED: Rattus norvegicus uncharacterized LOC102554492 (LOC102554492), transcript variant X3, ncRNA [XR_596657]
A_44_P1125426	0.0054052947	up	2.673371	2.673371	1.41866	LOC103692402	PREDICTED: Rattus norvegicus uncharacterized LOC103692402 (LOC103692402), ncRNA [XR_601073]
A_64_P010204	0.0022247524	down	2.6730218	-2.6730218	-1.4184716	Clstn1	Rattus norvegicus calsyntenin 1 (Clstn1), mRNA [NM_001007092]
A_64_P022620	0.0053491113	down	2.6702785	-2.6702785	-1.4169903	LOC100911353	PREDICTED: Rattus norvegicus uncharacterized LOC100911353 (LOC100911353), mRNA [XM_008759427]
A_44_P1082259	0.011756906	down	2.6676304	-2.6676304	-1.4155588	Aox3	Rattus norvegicus aldehyde oxidase 3 (Aox3), mRNA [NM_001008527]
A_44_P1163936	0.013767681	up	2.6643825	2.6643825	1.4138012	Amacr	Rattus norvegicus alpha-methylacyl-CoA racemase (Amacr), mRNA [NM_012816]
A_64_P037020	0.019059293	down	2.6617076	-2.6617076	-1.4123521	Selenoi	Rattus norvegicus selenoprotein I (Selenoi), mRNA [NM_001134754]
A_64_P378885	0.015187338	up	2.6615467	2.6615467	1.4122648	Amacr	Rattus norvegicus alpha-methylacyl-CoA racemase (Amacr), mRNA [NM_012816]
A_44_P1153961	0.009476886	up	2.6610901	2.6610901	1.4120173	Ell2	PREDICTED: Rattus norvegicus elongation factor for RNA polymerase II 2 (Ell2), transcript variant X1, mRNA [XM_008760603]
A_44_P537385	0.0028828704	down	2.660245	-2.660245	-1.4115591	Cep89	Rattus norvegicus centrosomal protein 89 (Cep89), mRNA [NM_001127599]
A_42_P840460	0.0039453763	up	2.6601794	2.6601794	1.4115235	Spice1	Rattus norvegicus spindle and centriole associated protein 1 (Spice1), mRNA [NM_001008285]
A_44_P309613	0.008226186	up	2.658691	2.658691	1.410716	LOC102546572	zinc finger protein 871 [Source:MGI Symbol;Acc:MGI:1921793] [ENSRNOT00000006697]
A_44_P1081500	0.007071499	down	2.6559858	-2.6559858	-1.4092474	Tubb2a	Rattus norvegicus tubulin, beta 2A class IIa (Tubb2a), mRNA [NM_001109119]
A_44_P896995	0.037561953	up	2.655686	2.655686	1.4090846		FQ155730 Rattus norvegicus spleen Sprague-Dawley Rattus norvegicus cDNA clone TL0AEA10YF12 3', mRNA sequence [FQ155730]
A_44_P1132801	0.037686273	up	2.65527	2.65527	1.4088587
A_44_P517591	0.044711795	up	2.6541111	2.6541111	1.4082288	Eef2k	eukaryotic elongation factor-2 kinase [Source:RGD Symbol;Acc:2538] [ENSRNOT00000022726]
A_44_P311334	0.006307048	up	2.6538398	2.6538398	1.4080813	Pde4d	PREDICTED: Rattus norvegicus phosphodiesterase 4D (Pde4d), transcript variant X2, mRNA [XM_008760722]
A_64_P131451	0.011103781	up	2.6531744	2.6531744	1.4077195	LOC102550991	PREDICTED: Rattus norvegicus uncharacterized LOC102550991 (LOC102550991), ncRNA [XR_361784]
A_43_P11861	0.014086363	up	2.6523159	2.6523159	1.4072526	Dio3	Rattus norvegicus iodothyronine deiodinase 3 (Dio3), mRNA [NM_017210]
A_44_P1091832	0.022164358	down	2.6518757	-2.6518757	-1.4070132	LOC102557105	PREDICTED: Rattus norvegicus MLV-related proviral Env polyprotein-like (LOC102557105), transcript variant X1, mRNA [XM_008760798]
A_44_P1149052	0.004235964	up	2.64864	2.64864	1.4052517	LOC501396	PREDICTED: Rattus norvegicus hypothetical protein LOC501396 (LOC501396), transcript variant X1, mRNA [XM_017599514]
A_44_P347149	0.012013033	up	2.6482193	2.6482193	1.4050226	Aass	Rattus norvegicus aminoadipate-semialdehyde synthase (Aass), mRNA [NM_001100963]
A_43_P22542	0.0032270404	down	2.6453483	-2.6453483	-1.4034576	Nsdhl	Rattus norvegicus NAD(P) dependent steroid dehydrogenase-like (Nsdhl), mRNA [NM_001009399]
A_44_P1098605	0.017885348	up	2.6441247	2.6441247	1.4027902
A_64_P107524	0.0029310074	down	2.6440196	-2.6440196	-1.4027328	Ptk6	Rattus norvegicus protein tyrosine kinase 6 (Ptk6), mRNA [NM_001108968]
A_42_P616485	0.03149914	up	2.6422358	2.6422358	1.4017591	RGD1563888	PREDICTED: Rattus norvegicus similar to DNA segment, Chr 16, ERATO Doi 472, expressed (RGD1563888), transcript variant X2, mRNA [XM_008768532]
A_44_P1110683	0.013858407	down	2.6414397	-2.6414397	-1.4013244	Epha3	Eph receptor A3 [Source:RGD Symbol;Acc:68389] [ENSRNOT00000090197]
A_42_P628652	0.0062555834	down	2.6411686	-2.6411686	-1.4011763	LOC501038	Q7TQ12_RAT (Q7TQ12) Aa1114, partial (11%) [TC595089]
A_44_P496447	0.016053444	down	2.6396463	-2.6396463	-1.4003446	Ntf3	Rattus norvegicus neurotrophin 3 (Ntf3), transcript variant 1, mRNA [NM_031073]
A_64_P030654	0.019475348	down	2.638785	-2.638785	-1.3998737	Inhba	Rattus norvegicus inhibin beta A subunit (Inhba), mRNA [NM_017128]
A_44_P430547	0.036313083	up	2.635191	2.635191	1.3979075	Ntrk1	Rattus norvegicus neurotrophic receptor tyrosine kinase 1 (Ntrk1), mRNA [NM_021589]
A_44_P1008245	0.0046695243	down	2.6351478	-2.6351478	-1.3978839	Casc1	Rattus norvegicus cancer susceptibility 1 (Casc1), mRNA [NM_001106627]
A_44_P1159809	0.017727103	down	2.6348913	-2.6348913	-1.3977435	Kcnn2	Rattus norvegicus potassium calcium-activated channel subfamily N member 2 (Kcnn2), transcript variant 1, mRNA [NM_001309404]
A_64_P090498	0.03755373	up	2.6347015	2.6347015	1.3976395	RGD1563747	PREDICTED: Rattus norvegicus similar to double homeobox, 4 (RGD1563747), mRNA [XM_017588566]
A_64_P166385	0.014579269	down	2.6343024	-2.6343024	-1.3974209	Kifc1	Rattus norvegicus kinesin family member C1 (Kifc1), mRNA [NM_001005878]
A_44_P1148567	0.0016786758	up	2.633658	2.633658	1.3970679
A_43_P12875	0.008761071	up	2.6334321	2.6334321	1.3969443	Bbs2	Rattus norvegicus Bardet-Biedl syndrome 2 (Bbs2), mRNA [NM_053618]
A_64_P084538	0.0026099153	down	2.6331959	-2.6331959	-1.3968148	Tjp3	Rattus norvegicus tight junction protein 3 (Tjp3), mRNA [NM_001108073]
A_44_P1081317	0.022397963	down	2.6321099	-2.6321099	-1.3962197	Mest	Rattus norvegicus mesoderm specific transcript (Mest), mRNA [NM_001009617]
A_44_P192543	0.0037033015	down	2.6317575	-2.6317575	-1.3960265	Fkbp11	Rattus norvegicus FK506 binding protein 11 (Fkbp11), mRNA [NM_001013105]
A_44_P1087433	0.013986074	up	2.6291368	2.6291368	1.3945892	Hps4	Rattus norvegicus Hermansky-Pudlak syndrome 4 (Hps4), mRNA [NM_001107148]
A_44_P1146970	0.03359117	up	2.6270542	2.6270542	1.393446	LOC102554337	PREDICTED: Rattus norvegicus uncharacterized LOC102554337 (LOC102554337), transcript variant X2, ncRNA [XR_594050]
A_44_P1141864	0.029133689	up	2.6265945	2.6265945	1.3931935		CR476389 Rat pBluescript Lion Rattus norvegicus cDNA clone LIONp463H07123 3', mRNA sequence [CR476389]
A_43_P13043	0.0030130777	down	2.6232686	-2.6232686	-1.3913655	Ebp	Rattus norvegicus emopamil binding protein (sterol isomerase) (Ebp), mRNA [NM_057137]
A_44_P513465	0.014617811	up	2.6230936	2.6230936	1.3912693	Ddx31	Rattus norvegicus DEAD-box helicase 31 (Ddx31), mRNA [NM_001107824]
A_44_P108003	0.022700291	down	2.6226184	-2.6226184	-1.3910079	Nipal2	Rattus norvegicus NIPA-like domain containing 2 (Nipal2), mRNA [NM_001130559]
A_44_P1135005	0.02360499	up	2.6222985	2.6222985	1.390832	LOC102550091	PREDICTED: Rattus norvegicus uncharacterized LOC102550091 (LOC102550091), ncRNA [XR_340278]
A_64_P125883	0.025493396	up	2.6216147	2.6216147	1.3904556	Socs3	Rattus norvegicus suppressor of cytokine signaling 3 (Socs3), mRNA [NM_053565]
A_44_P1115792	0.025449922	up	2.620619	2.620619	1.3899076	Col13a1	PREDICTED: Rattus norvegicus collagen type XIII alpha 1 chain (Col13a1), transcript variant X1, mRNA [XM_008772904]
A_44_P761087	0.0049871057	up	2.6201015	2.6201015	1.3896227	Ets2	Rattus norvegicus ETS proto-oncogene 2, transcription factor (Ets2), mRNA [NM_001107107]
A_64_P055428	0.03291352	up	2.619688	2.619688	1.389395	Dusp8	Rattus norvegicus dual specificity phosphatase 8 (Dusp8), mRNA [NM_001108510]
A_44_P247956	0.036389988	up	2.6177208	2.6177208	1.3883113		PREDICTED: Rattus norvegicus immunoglobulin lambda-like polypeptide 5-like (LOC680329), transcript variant X2, mRNA [XM_017598192]
A_64_P039997	0.019831253	down	2.6141527	-2.6141527	-1.3863434	Zfyve28	Rattus norvegicus zinc finger FYVE-type containing 28 (Zfyve28), mRNA [NM_001107227]
A_44_P271842	0.00638343	down	2.6134474	-2.6134474	-1.3859541	Zfp53	Rattus norvegicus zinc finger protein 53 (Zfp53), mRNA [NM_001107468]
A_64_P044241	0.04962536	up	2.612925	2.612925	1.3856658	Zp3	Rattus norvegicus zona pellucida glycoprotein 3 (Zp3), mRNA [NM_053762]
A_44_P1363203	0.009332792	up	2.6103246	2.6103246	1.3842292
A_44_P1089341	0.036227096	up	2.609969	2.609969	1.3840326	Mfsd1	Rattus norvegicus major facilitator superfamily domain containing 1 (Mfsd1), mRNA [NM_001191847]
A_44_P1109834	0.007810482	down	2.6064954	-2.6064954	-1.3821113	LOC102555634	PREDICTED: Rattus norvegicus interferon-inducible GTPase 1-like (LOC102555634), mRNA [XM_006220680]
A_64_P121427	0.008441961	down	2.6059825	-2.6059825	-1.3818274	Slc17a9	Rattus norvegicus solute carrier family 17 member 9 (Slc17a9), mRNA [NM_001108613]
A_44_P1109919	0.0056633716	up	2.6036062	2.6036062	1.3805113	Flcn	Rattus norvegicus folliculin (Flcn), mRNA [NM_199390]
A_64_P139586	0.0060726316	up	2.603458	2.603458	1.380429	Id3	Rattus norvegicus inhibitor of DNA binding 3, HLH protein (Id3), mRNA [NM_013058]
A_44_P1110816	0.04088423	down	2.6030517	-2.6030517	-1.380204	LOC102552104	PREDICTED: Rattus norvegicus MLV-related proviral Env polyprotein-like (LOC102552104), mRNA [XM_006248013]
A_44_P1144280	0.004499955	up	2.6029563	2.6029563	1.380151	LOC102550743	PREDICTED: Rattus norvegicus uncharacterized LOC102550743 (LOC102550743), ncRNA [XR_600444]
A_44_P227221	0.03698252	down	2.601752	-2.601752	-1.3794835	Syde2	Rattus norvegicus synapse defective Rho GTPase homolog 2 (Syde2), mRNA [NM_001305229]
A_44_P1105250	0.009168529	up	2.6011906	2.6011906	1.3791721	Plekha5	PREDICTED: Rattus norvegicus pleckstrin homology domain containing A5 (Plekha5), transcript variant X28, mRNA [XM_008763366]
A_43_P15057	0.011466058	up	2.6008902	2.6008902	1.3790054	Nr1d2	Rattus norvegicus nuclear receptor subfamily 1, group D, member 2 (Nr1d2), mRNA [NM_147210]
A_44_P1133238	0.007974093	up	2.5976415	2.5976415	1.3772023	LOC102552452	PREDICTED: Rattus norvegicus uncharacterized LOC102552452 (LOC102552452), transcript variant X1, ncRNA [XR_589753]
A_44_P1367257	0.00814138	down	2.5970044	-2.5970044	-1.3768485
A_64_P019215	0.0021315436	down	2.5967405	-2.5967405	-1.3767018	Mknk2	Rattus norvegicus MAP kinase-interacting serine/threonine kinase 2 (Mknk2), mRNA [NM_001011985]
A_44_P344077	0.0059897974	up	2.5949516	2.5949516	1.3757076	Flcn	Rattus norvegicus folliculin (Flcn), mRNA [NM_199390]
A_44_P1361114	0.009034359	down	2.5941308	-2.5941308	-1.3752512
A_44_P1097968	0.0068026483	up	2.5927625	2.5927625	1.37449	LOC103694072	PREDICTED: Rattus norvegicus uncharacterized LOC103694072 (LOC103694072), transcript variant X2, mRNA [XM_008773965]
A_44_P1102313	0.012867641	up	2.591329	2.591329	1.3736923	Gdnf	PREDICTED: Rattus norvegicus glial cell derived neurotrophic factor (Gdnf), transcript variant X3, mRNA [XM_006232010]
A_43_P20149	0.0093033	down	2.5909214	-2.5909214	-1.3734652	Trim25	Rattus norvegicus tripartite motif-containing 25 (Trim25), mRNA [NM_001009536]
A_44_P962865	0.017780174	up	2.5898123	2.5898123	1.3728476		Q5XGT0_XENLA (Q5XGT0) LOC495149 protein (Fragment), partial (6%) [TC628974]
A_42_P491454	0.03379403	down	2.5891962	-2.5891962	-1.3725042	Gnat1	Rattus norvegicus G protein subunit alpha transducin 1 (Gnat1), mRNA [NM_001108780]
A_64_P121786	0.011251248	down	2.5888188	-2.5888188	-1.372294	Abcg2	Rattus norvegicus ATP-binding cassette, subfamily G (WHITE), member 2 (Abcg2), mRNA [NM_181381]
A_64_P121091	0.008370321	up	2.5879695	2.5879695	1.3718206	Acoxl	Rattus norvegicus acyl-CoA oxidase-like (Acoxl), mRNA [NM_001106508]
A_44_P196824	0.00835637	down	2.5872917	-2.5872917	-1.3714427	Serpinb9	Rattus norvegicus serpin family B member 9 (Serpinb9), mRNA [NM_001007732]
A_64_P001204	0.041520078	up	2.5868914	2.5868914	1.3712195	Ackr2	Rattus norvegicus atypical chemokine receptor 2 (Ackr2), mRNA [NM_078621]
A_44_P1081695	0.009809317	up	2.5868204	2.5868204	1.3711798	Pdzrn3	Rattus norvegicus PDZ domain containing RING finger 3 (Pdzrn3), mRNA [NM_001271251]
A_44_P1161650	0.0030678818	down	2.5860739	-2.5860739	-1.3707634	LOC100911353	PREDICTED: Rattus norvegicus uncharacterized LOC100911353 (LOC100911353), mRNA [XM_008759427]
A_64_P044762	0.011671103	down	2.5833774	-2.5833774	-1.3692584	Srms	Rattus norvegicus src-related kinase lacking C-terminal regulatory tyrosine and N-terminal myristylation sites (Srms), mRNA [NM_001011961]
A_64_P082898	0.0031411024	up	2.5830686	2.5830686	1.3690859	Meig1	Rattus norvegicus meiosis/spermiogenesis associated 1 (Meig1), mRNA [NM_001134882]
A_44_P791351	0.006886748	down	2.58184	-2.58184	-1.3683996	Ndst1	PREDICTED: Rattus norvegicus N-deacetylase/N-sulfotransferase 1 (Ndst1), transcript variant X7, mRNA [XM_008772130]
A_44_P1085163	0.025304563	down	2.5805283	-2.5805283	-1.3676664	Cdc7	Rattus norvegicus cell division cycle 7 (Cdc7), mRNA [NM_001108352]
A_44_P1086609	0.023383303	up	21217	1958-02-01	1.1989969	Nkd2	Rattus norvegicus naked cuticle homolog 2 (Nkd2), mRNA [NM_001107454]
A_43_P11879	0.007879512	up	2.5798402	2.5798402	1.3672817	Htr2b	Rattus norvegicus 5-hydroxytryptamine receptor 2B (Htr2b), mRNA [NM_017250]
A_64_P047037	0.036658123	up	2.5793343	2.5793343	1.3669987
A_44_P1127357	0.035350893	up	2.578227	2.578227	1.3663793	LOC102554026	PREDICTED: Rattus norvegicus uncharacterized LOC102554026 (LOC102554026), ncRNA [XR_347508]
A_44_P655718	0.0041340925	down	2.5766366	-2.5766366	-1.365489	Fam72a	Rattus norvegicus family with sequence similarity 72, member A (Fam72a), mRNA [NM_001081451]
A_64_P165243	0.025659256	up	2.576183	2.576183	1.3652351	Zfp108	PREDICTED: Rattus norvegicus zinc finger protein 108 (Zfp108), partial mRNA [XM_574384]
A_44_P783412	0.005083273	up	2.57511	2.57511	1.364634		UI-R-CA0-bgu-g-03-0-UI.s1 UI-R-CA0 Rattus norvegicus cDNA clone UI-R-CA0-bgu-g-03-0-UI 3', mRNA sequence [BF393107]
A_44_P1108360	0.0036417057	up	2.574259	2.574259	1.3641572	Ireb2	PREDICTED: Rattus norvegicus iron responsive element binding protein 2 (Ireb2), transcript variant X1, mRNA [XM_006243091]
A_44_P1084969	0.012996441	down	2.5720515	-2.5720515	-1.3629196	Tcf19	Rattus norvegicus transcription factor 19 (Tcf19), mRNA [NM_213561]
A_64_P156173	0.0033223662	up	2.5710897	2.5710897	1.3623799	Uspl1	Rattus norvegicus ubiquitin specific peptidase like 1 (Uspl1), transcript variant 1, mRNA [NM_001198555]
A_44_P1142946	0.020350797	down	2.5710256	-2.5710256	-1.3623439
A_64_P023102	0.004057985	up	2.570029	2.570029	1.3617846	Otor	Rattus norvegicus otoraplin (Otor), mRNA [NM_001108960]
A_44_P1135467	0.004410222	up	2.568678	2.568678	1.3610259
A_44_P1125131	0.010387173	up	2.5677848	2.5677848	1.3605243	LOC103695247	PREDICTED: Rattus norvegicus uncharacterized LOC103695247 (LOC103695247), ncRNA [XR_601001]
A_64_P098979	0.0053880033	down	2.567759	-2.567759	-1.3605098	Tsku	Rattus norvegicus tsukushi, small leucine rich proteoglycan (Tsku), mRNA [NM_001009965]
A_44_P1094139	0.03190635	down	2.5653584	-2.5653584	-1.3591604
A_44_P1161011	0.009210145	up	2.5632937	2.5632937	1.3579987
A_44_P771287	0.01739759	up	2.5622783	2.5622783	1.3574271		UI-R-AC0-yq-d-04-0-UI.s1 UI-R-AC0 Rattus norvegicus cDNA clone UI-R-AC0-yq-d-04-0-UI 3', mRNA sequence [AI704873]
A_44_P1085744	0.033228844	down	2.5610356	-2.5610356	-1.3567274	Trim59	Rattus norvegicus tripartite motif-containing 59 (Trim59), mRNA [NM_001108945]
A_44_P1123141	0.03531953	up	2.559549	2.559549	1.3558897
A_44_P1155079	0.03953257	up	2.5591886	2.5591886	1.3556864	Slc37a3	solute carrier family 37, member 3 [Source:RGD Symbol;Acc:1310346] [ENSRNOT00000011915]
A_44_P242321	0.00201123	up	2.5585055	2.5585055	1.3553014	Acaa2	Rattus norvegicus acetyl-CoA acyltransferase 2 (Acaa2), mRNA [NM_130433]
A_64_P078185	0.020027934	up	2.5580273	2.5580273	1.3550316	Hbz	Rattus norvegicus hemoglobin subunit zeta (Hbz), mRNA [NM_001172845]
A_44_P1155496	0.02684135	up	2.5572302	2.5572302	1.3545821		signal-regulatory protein alpha-like [Source:RGD Symbol;Acc:2321882] [ENSRNOT00000071638]
A_44_P1127094	0.024391271	up	2.554304	2.554304	1.3529302	LOC102552601	PREDICTED: Rattus norvegicus uncharacterized LOC102552601 (LOC102552601), transcript variant X2, ncRNA [XR_001844100]
A_44_P268192	0.009369479	up	2.5532346	2.5532346	1.352326		UI-R-C0-jq-e-03-0-UI.s2 UI-R-C0 Rattus norvegicus cDNA clone UI-R-C0-jq-e-03-0-UI 3', mRNA sequence [AI045896]
A_64_P067177	0.0019561586	down	2.5531068	-2.5531068	-1.3522539
A_44_P1132332	0.0054376433	up	2.5518682	2.5518682	1.3515538	LOC102547817	PREDICTED: Rattus norvegicus uncharacterized LOC102547817 (LOC102547817), transcript variant X1, ncRNA [XR_594939]
A_42_P497393	0.0066691176	up	2.5516136	2.5516136	1.3514098	LOC103690154	PREDICTED: Rattus norvegicus transcription regulator protein BACH1-like (LOC103690154), mRNA [XM_017598088]
A_44_P1103595	0.01543801	up	2.550874	2.550874	1.3509916
A_44_P1154806	0.013873983	down	2.5500503	-2.5500503	-1.3505256	Znf354b	zinc finger protein 354B [Source:RGD Symbol;Acc:7562538] [ENSRNOT00000004902]
A_64_P001052	0.0036971865	down	2.5499284	-2.5499284	-1.3504567	Mnd1	meiotic nuclear divisions 1 [Source:RGD Symbol;Acc:1309007] [ENSRNOT00000031179]
A_44_P340193	0.01661396	up	2.5471897	2.5471897	1.3489064	Hsdl1	Rattus norvegicus hydroxysteroid dehydrogenase like 1 (Hsdl1), mRNA [NM_001024896]
A_64_P312794	0.006233944	down	2.5415425	-2.5415425	-1.3457043		maltase-glucoamylase [Source:MGI Symbol;Acc:MGI:1203495] [ENSRNOT00000016912]
A_44_P1046787	0.0039687767	down	2.5406241	-2.5406241	-1.3451829	Sbspon	somatomedin B and thrombospondin, type 1 domain containing [Source:RGD Symbol;Acc:1559717] [ENSRNOT00000009530]
A_44_P1131123	0.01114821	up	2.5406024	2.5406024	1.3451706
A_44_P1128093	0.010655284	up	2.5395577	2.5395577	1.3445772	LOC103692868	PREDICTED: Rattus norvegicus uncharacterized LOC103692868 (LOC103692868), ncRNA [XR_593468]
A_64_P079930	0.011565001	up	2.5386121	2.5386121	1.3440399	Tcf15	Rattus norvegicus transcription factor 15 (Tcf15), mRNA [NM_001168579]
A_64_P064556	0.022163237	down	2.5334263	-2.5334263	-1.3410898	Slc36a4	Rattus norvegicus solute carrier family 36 member 4 (Slc36a4), mRNA [NM_001108127]
A_64_P006590	0.008699656	up	2.5316448	2.5316448	1.340075	Cyp2b2	Rattus norvegicus cytochrome P450, family 2, subfamily b, polypeptide 2 (Cyp2b2), mRNA [NM_001198676]
A_64_P042283	0.008475863	up	2.5315108	2.5315108	1.3399986	Crem	Rattus norvegicus cAMP responsive element modulator (Crem), transcript variant 9, mRNA [NM_001271248]
A_44_P1119282	0.0052476265	up	2.5297105	2.5297105	1.3389723	LOC102548928	PREDICTED: Rattus norvegicus uncharacterized LOC102548928 (LOC102548928), transcript variant X2, ncRNA [XR_001834783]
A_43_P18699	0.019944428	up	2.5294542	2.5294542	1.3388261	Micall1	MICAL-like 1 [Source:RGD Symbol;Acc:1305415] [ENSRNOT00000036357]
A_44_P1133583	0.0024169593	up	2.529262	2.529262	1.3387165	LOC102547495	PREDICTED: Rattus norvegicus uncharacterized LOC102547495 (LOC102547495), transcript variant X1, ncRNA [XR_595341]
A_44_P1080685	0.003286484	down	2.5292566	-2.5292566	-1.3387134	Cbln3	Rattus norvegicus cerebellin 3 precursor (Cbln3), mRNA [NM_001109330]
A_44_P533146	0.00909896	down	2.5281608	-2.5281608	-1.3380883		UI-R-DB0-byw-d-11-0-UI.s1 UI-R-DB0 Rattus norvegicus cDNA clone UI-R-DB0-byw-d-11-0-UI 3', mRNA sequence [BI285124]
A_44_P1366614	0.002536547	up	2.52715	2.52715	1.3375112		immunoglobulin heavy variable 3-5 [Source:MGI Symbol;Acc:MGI:3648045] [ENSRNOT00000040523]
A_44_P442728	0.0079630595	up	2.5270615	2.5270615	1.3374608	LOC498152	Rattus norvegicus hypothetical protein LOC498152 (LOC498152), mRNA [NM_001047923]
A_42_P604900	0.0024437357	up	2.5245962	2.5245962	1.3360527	Cbx7	Rattus norvegicus chromobox 7 (Cbx7), mRNA [NM_199117]
A_42_P717068	0.0052770195	up	2.5238066	2.5238066	1.3356013		AMGNNUC:NRPI3-00004-F8-A W Rat pituitary (10477) Rattus norvegicus cDNA clone nrpi3-00004-f8 5', mRNA sequence [CB714923]
A_42_P526030	0.0024902374	up	2.522082	2.522082	1.3346152	Decr1	Rattus norvegicus 2,4-dienoyl-CoA reductase 1 (Decr1), mRNA [NM_057197]
A_43_P22577	0.040638782	down	2.5217516	-2.5217516	-1.3344262	RGD1563091	similar to OEF2 [Source:RGD Symbol;Acc:1563091] [ENSRNOT00000084021]
A_44_P1059122	0.013527032	down	2.5216725	-2.5216725	-1.3343809	RGD1311946	Rattus norvegicus similar to RIKEN cDNA 1810055G02 (RGD1311946), mRNA [NM_001025683]
A_44_P724928	0.005121472	up	2.521657	2.521657	1.334372		UI-R-Y0-acv-b-08-0-UI.s1 UI-R-Y0 Rattus norvegicus cDNA clone UI-R-Y0-acv-b-08-0-UI 3', mRNA sequence [AI763958]
A_44_P318707	0.03000568	down	2.5185463	-2.5185463	-1.3325913	Acat2l1	acetyl-CoA acetyltransferase 2-like 1 [Source:RGD Symbol;Acc:1562948] [ENSRNOT00000018934]
A_44_P238424	0.0134751955	down	2.51418	-2.51418	-1.3300879	Akap5	Rattus norvegicus A-kinase anchoring protein 5 (Akap5), mRNA [NM_133515]
A_64_P011894	0.008231136	up	2.5126593	2.5126593	1.329215	Xbp1	Rattus norvegicus X-box binding protein 1 (Xbp1), transcript variant 1, mRNA [NM_001004210]
A_44_P332568	0.003132088	up	2.5121596	2.5121596	1.3289281	Olr1381	Rattus norvegicus olfactory receptor 1381 (Olr1381), mRNA [NM_001000523]
A_44_P1096924	0.0069265943	down	2.5119262	-2.5119262	-1.328794	Dtl	PREDICTED: Rattus norvegicus denticleless E3 ubiquitin protein ligase homolog (Dtl), transcript variant X2, mRNA [XM_006221606]
A_44_P1362420	0.015255912	up	2.511766	2.511766	1.328702
A_44_P1147474	0.0064214026	down	2.5112417	-2.5112417	-1.3284009	Dgkd	PREDICTED: Rattus norvegicus diacylglycerol kinase, delta (Dgkd), transcript variant X6, misc_RNA [XR_357182]
A_64_P349856	0.007174249	up	2.5108163	2.5108163	1.3281565	Pink1	PTEN induced putative kinase 1 [Source:RGD Symbol;Acc:1305769] [ENSRNOT00000083474]
A_44_P1162830	0.023209307	up	2.51065	2.51065	1.3280609
A_64_P079408	0.015086732	up	2.509849	2.509849	1.3276006	Wnt9b	Rattus norvegicus wingless-type MMTV integration site family, member 9B (Wnt9b), mRNA [NM_001107055]
A_44_P312089	0.0025917524	up	2.507693	2.507693	1.3263607	Neurl3	Rattus norvegicus neuralized E3 ubiquitin protein ligase 3 (Neurl3), mRNA [NM_001014100]
A_44_P1116460	0.0025455502	down	2.5057838	-2.5057838	-1.325262
A_42_P473168	0.0033933707	up	2.5047758	2.5047758	1.3246814	Bcl2l11	Rattus norvegicus BCL2 like 11 (Bcl2l11), transcript variant 3, mRNA [NM_171988]
A_44_P206068	0.008118427	up	2.5046232	2.5046232	1.3245935	Pdzd7	Rattus norvegicus PDZ domain containing 7 (Pdzd7), mRNA [NM_001106362]
A_44_P541608	0.0033743542	down	2.5035512	-2.5035512	-1.3239759	Pls1	Rattus norvegicus plastin 1 (Pls1), mRNA [NM_001108178]
A_44_P520859	0.025841486	down	2.500128	-2.500128	-1.3220019	Pkmyt1	Rattus norvegicus protein kinase, membrane associated tyrosine/threonine 1 (Pkmyt1), mRNA [NM_001105766]
A_44_P1082344	0.006812528	down	2.4988036	-2.4988036	-1.3212376	Afmid	Rattus norvegicus arylformamidase (Afmid), mRNA [NM_001111366]
A_44_P1090325	0.044146948	down	2.4949427	-2.4949427	-1.3190067	Prss53	Rattus norvegicus protease, serine, 53 (Prss53), mRNA [NM_001109156]
A_44_P1021246	0.008468171	up	2.4946058	2.4946058	1.3188118	Arhgef7	PREDICTED: Rattus norvegicus Rho guanine nucleotide exchange factor 7 (Arhgef7), transcript variant X7, mRNA [XM_017599976]
A_42_P842957	0.005097096	up	2.4944909	2.4944909	1.3187454		UI-R-CA1-bbl-d-04-0-UI.s1 UI-R-CA1 Rattus norvegicus cDNA clone UI-R-CA1-bbl-d-04-0-UI 3', mRNA sequence [BF387255]
A_42_P702611	0.0021567321	down	2.4922566	-2.4922566	-1.3174527	Dixdc1	Rattus norvegicus DIX domain containing 1 (Dixdc1), mRNA [NM_001037654]
A_44_P1102033	0.0025676778	up	2.4901202	2.4901202	1.3162154
A_64_P029377	0.024190333	up	2.4900613	2.4900613	1.3161812	Hrh4	Rattus norvegicus histamine receptor H4 (Hrh4), mRNA [NM_131909]
A_44_P1093935	0.006578609	down	2.487819	-2.487819	-1.3148814	RGD1565622	RGD1565622 [Source:RGD Symbol;Acc:1565622] [ENSRNOT00000051887]
A_64_P128862	0.005418247	down	2.4872255	-2.4872255	-1.3145373	Elovl5	Rattus norvegicus ELOVL fatty acid elongase 5 (Elovl5), mRNA [NM_134382]
A_44_P152421	0.004064101	up	2.4870548	2.4870548	1.3144383	Fnip1	Rattus norvegicus folliculin interacting protein 1 (Fnip1), mRNA [NM_001271163]
A_43_P12029	0.0028747409	up	2.4867105	2.4867105	1.3142385	Rgs5	Rattus norvegicus regulator of G-protein signaling 5 (Rgs5), mRNA [NM_019341]
A_44_P1128917	0.030809367	up	2.4856799	2.4856799	1.3136405
A_44_P285820	0.0027544159	down	2.482192	-2.482192	-1.3116148	Irs3	Rattus norvegicus insulin receptor substrate 3 (Irs3), mRNA [NM_032074]
A_43_P22313	0.028264975	up	2.4808438	2.4808438	1.3108308	Jmy	junction-mediating and regulatory protein [Source:MGI Symbol;Acc:MGI:1913096] [ENSRNOT00000075286]
A_44_P1107738	0.00502022	up	2.4805613	2.4805613	1.3106666	Slc38a4	solute carrier family 38, member 4 [Source:RGD Symbol;Acc:621836] [ENSRNOT00000085620]
A_64_P122238	0.008069608	down	2.4800406	-2.4800406	-1.3103637	Tuba4a	Rattus norvegicus tubulin, alpha 4A (Tuba4a), mRNA [NM_001007004]
A_44_P1367149	0.04488093	up	2.4797668	2.4797668	1.3102045		rCG64257-like [Source:RGD Symbol;Acc:2320908] [ENSRNOT00000048829]
A_64_P005208	0.016177952	up	2.4794235	2.4794235	1.3100047	Nqo1	Rattus norvegicus NAD(P)H quinone dehydrogenase 1 (Nqo1), mRNA [NM_017000]
A_44_P1101051	0.0030956974	down	2.4772496	-2.4772496	-1.3087392	Prr12	PREDICTED: Rattus norvegicus proline rich 12 (Prr12), transcript variant X1, mRNA [XM_008759481]
A_44_P1137430	0.0052095004	down	2.476167	-2.476167	-1.3081086	LOC102551048	PREDICTED: Rattus norvegicus uncharacterized LOC102551048 (LOC102551048), ncRNA [XR_341288]
A_44_P1114910	0.008821559	up	2.475119	2.475119	1.307498
A_44_P416751	0.00959888	down	2.473575	-2.473575	-1.3065977	Rpa1	Rattus norvegicus replication protein A1 (Rpa1), mRNA [NM_001047843]
A_42_P515405	0.019952515	up	2.473518	2.473518	1.3065643	Ier3	Rattus norvegicus immediate early response 3 (Ier3), mRNA [NM_212505]
A_64_P304049	0.0031116663	up	2.4708173	2.4708173	1.3049884	Pkib	Rattus norvegicus cAMP-dependent protein kinase inhibitor beta (Pkib), transcript variant 1, mRNA [NM_001076553]
A_44_P1109719	0.002429028	down	2.4695034	-2.4695034	-1.3042209	Fabp6	Rattus norvegicus fatty acid binding protein 6 (Fabp6), mRNA [NM_017098]
A_64_P164271	0.009864538	up	2.4692981	2.4692981	1.304101	Prox1	Rattus norvegicus prospero homeobox 1 (Prox1), mRNA [NM_001107201]
A_44_P225518	0.002619837	down	2.4668643	-2.4668643	-1.3026783	Asph	aspartate-beta-hydroxylase [Source:RGD Symbol;Acc:1312000] [ENSRNOT00000047805]
A_43_P14910	0.0026410944	down	2.4664962	-2.4664962	-1.302463	Ddc	Rattus norvegicus dopa decarboxylase (Ddc), transcript variant 1, mRNA [NM_012545]
A_42_P622436	0.014267531	down	2.4653804	-2.4653804	-1.3018103	Tuba1a	Rattus norvegicus tubulin, alpha 1A (Tuba1a), mRNA [NM_022298]
A_44_P1138199	0.021924285	up	2.4644153	2.4644153	1.3012453	LOC103694943	PREDICTED: Rattus norvegicus uncharacterized LOC103694943 (LOC103694943), ncRNA [XR_598193]
A_44_P1131343	0.006593047	up	2.463057	2.463057	1.30045	LOC103695052	PREDICTED: Rattus norvegicus uncharacterized LOC103695052 (LOC103695052), ncRNA [XR_599147]
A_64_P044435	0.014918432	up	2.462448	2.462448	1.3000932	Tgif1	Rattus norvegicus TGFB-induced factor homeobox 1 (Tgif1), mRNA [NM_001015020]
A_44_P653240	0.009049203	up	2.4620564	2.4620564	1.2998638	Eif4ebp3	Rattus norvegicus eukaryotic translation initiation factor 4E binding protein 3 (Eif4ebp3), mRNA [NM_001202552]
A_44_P135224	0.005109303	up	2.4617481	2.4617481	1.2996831	Plk3	Rattus norvegicus polo-like kinase 3 (Plk3), mRNA [NM_022187]
A_44_P1144241	0.0065007247	up	2.4610715	2.4610715	1.2992866	LOC103691929	PREDICTED: Rattus norvegicus zinc finger protein OZF-like (LOC103691929), misc_RNA [XR_001843104]
A_44_P1111860	0.011161239	down	16834	-2.4641	-1.3010607	Atp2b4	ATPase plasma membrane Ca2+ transporting 4 [Source:RGD Symbol;Acc:621305] [ENSRNOT00000046273]
A_44_P1083213	0.007980736	up	2.459338	2.459338	1.29827	Amelx	Rattus norvegicus amelogenin, X-linked (Amelx), transcript variant 1, mRNA [NM_001271074]
A_44_P1038341	0.011514805	up	2.45921	2.45921	1.2981949	Hal	Rattus norvegicus histidine ammonia lyase (Hal), mRNA [NM_017159]
A_42_P806899	0.018488962	up	2.4581223	2.4581223	1.2975566	Kdm6b	Rattus norvegicus lysine demethylase 6B (Kdm6b), mRNA [NM_001108829]
A_64_P162760	0.0028497672	up	2.4569845	2.4569845	1.2968887
A_64_P118047	0.020804543	down	2.4557886	-2.4557886	-1.2961863	Prtg	Rattus norvegicus protogenin (Prtg), mRNA [NM_001037651]
A_44_P1144616	0.008285842	down	2.454612	-2.454612	-1.295495	LOC108350694	PREDICTED: Rattus norvegicus insulin-induced gene 1 protein pseudogene (LOC108350694), transcript variant X2, misc_RNA [XR_001843344]
A_64_P121772	0.031776704	down	2.4532354	-2.4532354	-1.2946856	LOC102556574	PREDICTED: Rattus norvegicus serrate RNA effector molecule homolog (LOC102556574), mRNA [XM_006227268]
A_64_P159658	0.0061915573	up	2.453031	2.453031	1.2945654	Rasgef1a	RasGEF domain family, member 1A [Source:RGD Symbol;Acc:1305836] [ENSRNOT00000051804]
A_44_P1164191	0.024819551	up	2.4497812	2.4497812	1.2926528	Hemgn	Rattus norvegicus hemogen (Hemgn), mRNA [NM_133294]
A_44_P1365978	0.01672233	up	2.4475927	2.4475927	1.2913635		zinc finger protein 939 [Source:RGD Symbol;Acc:1584032] [ENSRNOT00000039649]
A_42_P826115	0.04949933	down	2.4466965	-2.4466965	-1.2908351	Sapcd2	Rattus norvegicus suppressor APC domain containing 2 (Sapcd2), mRNA [NM_001109418]
A_44_P182402	0.034963436	up	2.4459498	2.4459498	1.2903948	Cnksr3	Rattus norvegicus Cnksr family member 3 (Cnksr3), mRNA [NM_001012061]
A_64_P021980	0.007825485	down	2.445255	-2.445255	-1.289985	Sstr4	Rattus norvegicus somatostatin receptor 4 (Sstr4), mRNA [NM_013036]
A_44_P1140431	0.01353314	up	2.4449174	2.4449174	1.2897857
A_44_P433964	0.017577222	down	2.4445357	-2.4445357	-1.2895604	Ldah	Rattus norvegicus lipid droplet associated hydrolase (Ldah), mRNA [NM_001014075]
A_44_P1368811	0.04405987	up	2.4437284	2.4437284	1.289084
A_44_P327758	0.017408758	up	2.4419641	2.4419641	1.288042		UI-R-A1-ee-e-02-0-UI.s1 UI-R-A1 Rattus norvegicus cDNA clone UI-R-A1-ee-e-02-0-UI 3' similar to gi [AA925254]
A_42_P712191	0.013167385	down	2.4416435	-2.4416435	-1.2878525	Gins1	Rattus norvegicus GINS complex subunit 1 (Gins1), mRNA [NM_001109207]
A_42_P785801	0.020123284	up	2.4410684	2.4410684	1.2875127		cytochrome P450, family 3, subfamily a, polypeptide 23/polypeptide 1 [Source:RGD Symbol;Acc:628626] [ENSRNOT00000051244]
A_44_P1134815	0.0054453933	up	2.4408891	2.4408891	1.2874068
A_44_P1089161	0.014449252	up	2.440462	2.440462	1.2871543	Rbfox1	Rattus norvegicus RNA binding protein, fox-1 homolog 1 (Rbfox1), mRNA [NM_001106974]
A_44_P1107448	0.01041862	down	2.439752	-2.439752	-1.2867346	Tmem19	PREDICTED: Rattus norvegicus transmembrane protein 19 (Tmem19), transcript variant X2, mRNA [XM_008765355]
A_44_P208304	0.004780893	down	2.4394147	-2.4394147	-1.286535	Pak3	Rattus norvegicus p21 (RAC1) activated kinase 3 (Pak3), mRNA [NM_019210]
A_64_P031422	0.007840909	down	2.4394102	-2.4394102	-1.2865324	Olr735	Rattus norvegicus olfactory receptor 735 (Olr735), mRNA [NM_001000922]
A_44_P1129179	0.017792089	up	2.4394066	2.4394066	1.2865303	LOC102549537	PREDICTED: Rattus norvegicus uncharacterized LOC102549537 (LOC102549537), transcript variant X4, ncRNA [XR_001844593]
A_44_P477768	0.0023310238	down	2.437953	-2.437953	-1.2856703	Ccnd2	Rattus norvegicus cyclin D2 (Ccnd2), mRNA [NM_022267]
A_42_P470782	0.0029281562	up	2.435152	2.435152	1.2840118		FM075708 etnoaor Rattus norvegicus cDNA clone etnoaorP0024N21 5', mRNA sequence [FM075708]
A_44_P1149323	0.037032753	up	2.4341402	2.4341402	1.2834122	LOC102552417	PREDICTED: Rattus norvegicus uncharacterized LOC102552417 (LOC102552417), transcript variant X1, ncRNA [XR_359961]
A_64_P246030	0.0031573137	down	2.433863	-2.433863	-1.283248	Pfkfb1	Rattus norvegicus 6-phosphofructo-2-kinase/fructose-2,6-biphosphatase 1 (Pfkfb1), transcript variant 1, mRNA [NM_012621]
A_44_P1128785	0.007604694	up	2.4302046	2.4302046	1.2810777	LOC102550357	PREDICTED: Rattus norvegicus uncharacterized LOC102550357 (LOC102550357), ncRNA [XR_348230]
A_64_P077692	0.0023581998	down	2.4301155	-2.4301155	-1.2810248	Ly49si1	Rattus norvegicus immunoreceptor Ly49si1 (Ly49si1), mRNA [NM_001009497]
A_44_P1141034	0.014510856	up	2.4293642	2.4293642	1.2805787	LOC103690761	PREDICTED: Rattus norvegicus uncharacterized LOC103690761 (LOC103690761), ncRNA [XR_589592]
A_44_P480267	0.012639869	down	2.4285138	-2.4285138	-1.2800736	Asns	Rattus norvegicus asparagine synthetase (glutamine-hydrolyzing) (Asns), mRNA [NM_013079]
A_44_P452546	0.0063498807	down	2.4281557	-2.4281557	-1.2798609	Gstcd	Rattus norvegicus glutathione S-transferase, C-terminal domain containing (Gstcd), mRNA [NM_001107725]
A_44_P391156	0.0092835855	down	2.4253745	-2.4253745	-1.2782075	Igf2bp3	insulin-like growth factor 2 mRNA binding protein 3 [Source:RGD Symbol;Acc:1306512] [ENSRNOT00000050994]
A_44_P1128947	0.011255982	up	2.4221256	2.4221256	1.2762736
A_44_P106014	0.0037819329	down	2.4213552	-2.4213552	-1.2758148	Cetn2	centrin 2 [Source:RGD Symbol;Acc:620247] [ENSRNOT00000078929]
A_44_P885046	0.011546459	down	2.4195461	-2.4195461	-1.2747364	LOC682357	PREDICTED: Rattus norvegicus similar to homolog of yeast ribosome biogenesis regulatory protein RRS1 (LOC682357), misc_RNA [XR_085748]
A_42_P754888	0.030118478	up	2.419177	2.419177	1.2745163	Dlk1	Rattus norvegicus delta like non-canonical Notch ligand 1 (Dlk1), mRNA [NM_053744]
A_44_P221437	0.01059954	down	2.4155014	-2.4155014	-1.2723227	Dtx4	Rattus norvegicus deltex E3 ubiquitin ligase 4 (Dtx4), mRNA [NM_001047855]
A_44_P1132494	0.011394505	down	2.4136326	-2.4136326	-1.2712061
A_44_P773265	0.0068004634	down	2.412021	-2.412021	-1.2702425	Akap17b	A kinase (PRKA) anchor protein 17B [Source:RGD Symbol;Acc:1566363] [ENSRNOT00000039809]
A_44_P1096556	0.004100176	up	2.4101954	2.4101954	1.26915	Nxpe5l1	PREDICTED: Rattus norvegicus neurexophilin and PC-esterase domain family, member 5-like 1 (Nxpe5l1), transcript variant X3, mRNA [XM_008759318]
A_44_P1085912	0.0033340731	down	2.4096324	-2.4096324	-1.2688131	Sec14l4	Rattus norvegicus SEC14-like lipid binding 4 (Sec14l4), mRNA [NM_001109090]
A_64_P076780	0.020934833	down	2.4088764	-2.4088764	-1.2683604	Adgrg2	Rattus norvegicus adhesion G protein-coupled receptor G2 (Adgrg2), transcript variant 1, mRNA [NM_181366]
A_64_P081078	0.0037664878	up	2.4081373	2.4081373	1.2679176	Gls2	Rattus norvegicus glutaminase 2 (Gls2), transcript variant 2, mRNA [NM_001270787]
A_44_P1111850	0.002943527	down	2.4061716	-2.4061716	-1.2667395	Pik3c2b	phosphatidylinositol-4-phosphate 3-kinase, catalytic subunit type 2 beta [Source:RGD Symbol;Acc:1306541] [ENSRNOT00000090170]
A_44_P263042	0.008016208	down	2.4059446	-2.4059446	-1.2666034	Zfp955a	Rattus norvegicus zinc finger protein 955A (Zfp955a), mRNA [NM_001126281]
A_42_P746868	0.027310524	down	2.4047549	-2.4047549	-1.2658899	Oxct1	Rattus norvegicus 3-oxoacid CoA transferase 1 (Oxct1), mRNA [NM_001127580]
A_44_P1368894	0.011742792	down	2.4042006	-2.4042006	-1.2655573	Snurf	Rattus norvegicus SNRPN upstream reading frame (Snurf), transcript variant 1, mRNA [NM_001270712]
A_44_P1086968	0.0034529022	up	2.4036918	2.4036918	1.2652519	Brd2	Rattus norvegicus bromodomain containing 2 (Brd2), mRNA [NM_212495]
A_64_P100023	0.01373854	down	2.4036233	-2.4036233	-1.2652109	Zcchc3	PREDICTED: Rattus norvegicus zinc finger CCHC-type containing 3 (Zcchc3), mRNA [XM_001072887]
A_44_P1151483	0.0030806425	up	2.4035332	2.4035332	1.2651567
A_44_P1123326	0.027724499	up	2.4029825	2.4029825	1.264826	LOC102556034	PREDICTED: Rattus norvegicus uncharacterized LOC102556034 (LOC102556034), ncRNA [XR_345592]
A_64_P041184	0.005818598	up	2.4028692	2.4028692	1.2647581	Vipr2	Rattus norvegicus vasoactive intestinal peptide receptor 2 (Vipr2), mRNA [NM_017238]
A_64_P138086	0.0079409685	up	2.4024887	2.4024887	1.2645296	Pcdh20	Rattus norvegicus protocadherin 20 (Pcdh20), mRNA [NM_001107280]
A_44_P1139604	0.002878117	up	2.4021413	2.4021413	1.264321	LOC102553877	PREDICTED: Rattus norvegicus uncharacterized LOC102553877 (LOC102553877), transcript variant X1, ncRNA [XR_361838]
A_44_P557634	0.0034083887	up	2.4015143	2.4015143	1.2639444	Zfp710	Rattus norvegicus zinc finger protein 710 (Zfp710), mRNA [NM_001134563]
A_64_P063239	0.005897954	down	2.4009686	-2.4009686	-1.2636164	Adamdec1	Rattus norvegicus ADAM-like, decysin 1 (Adamdec1), mRNA [NM_001106046]
A_43_P19907	0.011060865	down	2.397631	-2.397631	-1.2616096	Loxl1	Rattus norvegicus lysyl oxidase-like 1 (Loxl1), mRNA [NM_001012125]
A_44_P313679	0.043283585	up	2.397539	2.397539	1.2615542	Slc7a2	Rattus norvegicus solute carrier family 7 member 2 (Slc7a2), transcript variant 2, mRNA [NM_001134686]
A_43_P14382	0.0025552867	up	2.3971856	2.3971856	1.2613416	LOC102549726	Rattus norvegicus uncharacterized LOC102549726 (LOC102549726), long non-coding RNA [NR_110713]
A_64_P157239	0.022174465	up	2.395706	2.395706	1.2604508		704310703H1 RAPANOE01 Rattus norvegicus cDNA clone 704310703 N', mRNA sequence [CK226787]
A_44_P1101371	0.023028065	down	2.3947208	-2.3947208	-1.2598574	Tmem41b	Rattus norvegicus transmembrane protein 41B (Tmem41b), mRNA [NM_001012358]
A_64_P125312	0.033688806	up	2.3946745	2.3946745	1.2598295	Wasf2	Rattus norvegicus WAS protein family, member 2 (Wasf2), mRNA [NM_001013167]
A_44_P1107443	0.0038470214	up	2.3937876	2.3937876	1.2592951	Ppp1r12a	protein phosphatase 1, regulatory subunit 12A [Source:RGD Symbol;Acc:620013] [ENSRNOT00000080285]
A_64_P071790	0.009350985	down	2.3926191	-2.3926191	-1.2585907	Adgrf3	Rattus norvegicus adhesion G protein-coupled receptor F3 (Adgrf3), mRNA [NM_001106712]
A_44_P1148913	0.034222562	up	2.392532	2.392532	1.2585382	Dancr	Rattus norvegicus differentiation antagonizing non-protein coding RNA (Dancr), long non-coding RNA [NR_130115]
A_44_P1104367	0.007769621	up	2.3922684	2.3922684	1.2583792	Zfp217	zinc finger protein 217 [Source:RGD Symbol;Acc:1308451] [ENSRNOT00000081593]
A_64_P064909	0.008020581	down	2.3921473	-2.3921473	-1.2583063	Aldoc	Rattus norvegicus aldolase, fructose-bisphosphate C (Aldoc), mRNA [NM_012497]
A_44_P474101	0.007150253	up	2.3919759	2.3919759	1.2582028	Slc7a1	Rattus norvegicus solute carrier family 7 member 1 (Slc7a1), mRNA [NM_013111]
A_44_P578847	0.004228834	up	2.391805	2.391805	1.2580997
A_44_P449727	0.0043428154	down	2.3909879	-2.3909879	-1.2576067	Ttc12	Rattus norvegicus tetratricopeptide repeat domain 12 (Ttc12), mRNA [NM_001004246]
A_43_P16457	0.027928732	down	2.3893816	-2.3893816	-1.2566373	Creld2	Rattus norvegicus cysteine-rich with EGF-like domains 2 (Creld2), mRNA [NM_001037208]
A_44_P1057602	0.008351463	up	2.3887358	2.3887358	1.2562473	Ercc6	Rattus norvegicus ERCC excision repair 6, chromatin remodeling factor (Ercc6), mRNA [NM_001107296]
A_44_P1093552	0.016624127	up	2.3882287	2.3882287	1.2559409	Palm2	Rattus norvegicus paralemmin 2 (Palm2), mRNA [NM_001305995]
A_44_P553001	0.013762189	up	2.386148	2.386148	1.2546835		AGENCOURT_17626254 NIH_MGC_236 Rattus norvegicus cDNA clone IMAGE:7130418 5', mRNA sequence [CK474938]
A_44_P435513	0.022188127	down	2.3821638	-2.3821638	-1.2522726		UI-R-BS1-axy-c-05-0-UI.s1 UI-R-BS1 Rattus norvegicus cDNA clone UI-R-BS1-axy-c-05-0-UI 3', mRNA sequence [BE115992]
A_44_P1362406	0.0040077595	up	2.3820891	2.3820891	1.2522274	LOC102556096	PREDICTED: Rattus norvegicus pyrin domain-containing protein 3-like (LOC102556096), transcript variant X7, mRNA [XM_008763584]
A_44_P1008950	0.003977843	down	2.381799	-2.381799	-1.2520516	Isyna1	Rattus norvegicus inositol-3-phosphate synthase 1 (Isyna1), mRNA [NM_001013880]
A_44_P1097978	0.010893819	down	2.3804996	-2.3804996	-1.2512643
A_43_P13069	0.025761113	down	2.3797145	-2.3797145	-1.2507885	Chek1	Rattus norvegicus checkpoint kinase 1 (Chek1), mRNA [NM_080400]
A_44_P1114800	0.009127596	down	2.379121	-2.379121	-1.2504287	Slc26a2	PREDICTED: Rattus norvegicus solute carrier family 26 member 2 (Slc26a2), transcript variant X1, mRNA [XM_017600835]
A_44_P1081860	0.038823012	up	2.3783183	2.3783183	1.2499418	Sugct	Rattus norvegicus succinylCoA:glutarate-CoA transferase (Sugct), mRNA [NM_001014146]
A_42_P578947	0.0036542977	down	2.3771985	-2.3771985	-1.2492623	LOC102556395	PREDICTED: Rattus norvegicus uncharacterized LOC102556395 (LOC102556395), transcript variant X1, ncRNA [XR_001840384]
A_64_P149930	0.0037904684	up	2.3770597	2.3770597	1.2491782	Vdr	Rattus norvegicus vitamin D (1,25- dihydroxyvitamin D3) receptor (Vdr), mRNA [NM_017058]
A_42_P544898	0.0037215631	down	2.3759682	-2.3759682	-1.2485155	Bcl6b	Rattus norvegicus B-cell CLL/lymphoma 6B (Bcl6b), mRNA [NM_001108279]
A_64_P040245	0.0110135265	down	2.3719873	-2.3719873	-1.2460963	Ndst1	Rattus norvegicus N-deacetylase and N-sulfotransferase 1 (Ndst1), mRNA [NM_024361]
A_44_P1086764	0.00657175	down	2.3716593	-2.3716593	-1.2458967	Tuft1	Rattus norvegicus tuftelin 1 (Tuft1), mRNA [NM_001108948]
A_44_P1029397	0.021082545	down	2.3713474	-2.3713474	-1.245707	Bst2	Rattus norvegicus bone marrow stromal cell antigen 2 (Bst2), mRNA [NM_198134]
A_43_P23362	0.00967383	down	2.3707495	-2.3707495	-1.2453432	Ttc8	Rattus norvegicus tetratricopeptide repeat domain 8 (Ttc8), mRNA [NM_001106752]
A_44_P999395	0.030386658	up	2.3691792	2.3691792	1.2443874	Lmbr1l	Rattus norvegicus limb development membrane protein 1-like (Lmbr1l), mRNA [NM_001013950]
A_64_P162764	0.0034232459	up	2.3689995	2.3689995	1.2442778
A_44_P1139895	0.026125157	up	2.3666763	2.3666763	1.2428623	LOC102553445	PREDICTED: Rattus norvegicus uncharacterized LOC102553445 (LOC102553445), ncRNA [XR_343676]
A_44_P614539	0.006586893	up	2.3655136	2.3655136	1.2421534	Fmo2	PREDICTED: Rattus norvegicus flavin containing monooxygenase 2 (Fmo2), transcript variant X1, mRNA [XM_008769604]
A_64_P144794	0.008026061	down	2.3652427	-2.3652427	-1.2419882	Hfe	Rattus norvegicus hemochromatosis (Hfe), transcript variant 1, mRNA [NM_053301]
A_44_P241541	0.01833536	up	2.3651712	2.3651712	1.2419446	Tcp11l2	Rattus norvegicus t-complex 11 like 2 (Tcp11l2), mRNA [NM_001017458]
A_44_P1128706	0.032768033	up	2.3648229	2.3648229	1.2417321
A_64_P043174	0.008109206	up	2.3627725	2.3627725	1.2404807	Hist3h2ba	Rattus norvegicus histone cluster 3, H2ba (Hist3h2ba), mRNA [NM_001111127]
A_64_P036676	0.008421435	up	2.3612306	2.3612306	1.2395389	Klf6	Rattus norvegicus Kruppel-like factor 6 (Klf6), mRNA [NM_031642]
A_64_P047226	0.020755276	up	2.3610601	2.3610601	1.2394347	Cyp2c6v1	cytochrome P450, family 2, subfamily C, polypeptide 6, variant 1 [Source:RGD Symbol;Acc:619934] [ENSRNOT00000074103]
A_64_P151368	0.016605543	up	2.3575263	2.3575263	1.2372738	Alyref	Rattus norvegicus Aly/REF export factor (Alyref), mRNA [NM_001109602]
A_64_P041802	0.00658905	up	2.3574934	2.3574934	1.2372537	Klhl21	Rattus norvegicus kelch-like family member 21 (Klhl21), mRNA [NM_001107996]
A_44_P411771	0.007089716	up	2.3574204	2.3574204	1.2372091	Hyls1	PREDICTED: Rattus norvegicus hypothetical protein LOC680262, transcript variant 2 (LOC680262), mRNA [XM_002729924]
A_44_P1151889	0.0062676696	down	2.3568273	-2.3568273	-1.236846	Rad23a	PREDICTED: Rattus norvegicus RAD23 homolog A, nucleotide excision repair protein (Rad23a), transcript variant X3, mRNA [XM_008772411]
A_44_P466321	0.020286256	up	2.3565469	2.3565469	1.2366743	Rell1	Rattus norvegicus RELT-like 1 (Rell1), mRNA [NM_001113776]
A_44_P1109914	0.010381104	up	2.3565009	2.3565009	1.2366462	Flcn	PREDICTED: Rattus norvegicus folliculin (Flcn), transcript variant X4, mRNA [XM_017597269]
A_42_P711464	0.037637018	down	2.3561494	-2.3561494	-1.236431	Cfap45	Rattus norvegicus cilia and flagella associated protein 45 (Cfap45), mRNA [NM_001024882]
A_44_P522859	0.0073410086	down	2.355181	-2.355181	-1.2358379	Sfxn4	Rattus norvegicus sideroflexin 4 (Sfxn4), mRNA [NM_001108527]
A_42_P652586	0.0064432714	down	2.3547063	-2.3547063	-1.2355471	Stat5a	Rattus norvegicus signal transducer and activator of transcription 5A (Stat5a), mRNA [NM_017064]
A_44_P468468	0.016342627	up	2.3542786	2.3542786	1.235285	Lbp	Rattus norvegicus lipopolysaccharide binding protein (Lbp), mRNA [NM_017208]
A_42_P734395	0.010044255	down	2.353128	-2.353128	-1.2345798	Scml4	Rattus norvegicus sex comb on midleg-like 4 (Drosophila) (Scml4), mRNA [NM_001107638]
A_44_P402578	0.013738828	down	2.3519666	-2.3519666	-1.2338675	Il7	Rattus norvegicus interleukin 7 (Il7), mRNA [NM_013110]
A_42_P720077	0.017985377	up	2.3507783	2.3507783	1.2331384	Fmo5	Rattus norvegicus flavin containing monooxygenase 5 (Fmo5), mRNA [NM_144739]
A_43_P11343	0.0034756043	down	2.3494544	-2.3494544	-1.2323258	Smim1	PREDICTED: Rattus norvegicus small integral membrane protein 1 (Smim1), transcript variant X1, mRNA [XM_006239508]
A_44_P1096096	0.02034866	up	2.3484693	2.3484693	1.2317207
A_44_P1109609	0.0049954243	up	2.3480544	2.3480544	1.2314658	Adcy9	PREDICTED: Rattus norvegicus adenylate cyclase 9 (Adcy9), transcript variant X1, mRNA [XM_008767525]
A_64_P083034	0.004184842	down	2.345946	-2.345946	-1.2301699	Asmt	Rattus norvegicus acetylserotonin O-methyltransferase (Asmt), mRNA [NM_144759]
A_64_P019280	0.008157596	up	2.3454726	2.3454726	1.2298787	Pik3ip1	Rattus norvegicus phosphoinositide-3-kinase interacting protein 1 (Pik3ip1), mRNA [NM_001017453]
A_44_P100496	0.026013557	up	2.34455	2.34455	1.229311	Prdm8	PR/SET domain 8 [Source:RGD Symbol;Acc:1311628] [ENSRNOT00000071706]
A_44_P1124821	0.009394666	up	2.3442767	2.3442767	1.2291428	LOC102547823	PREDICTED: Rattus norvegicus uncharacterized LOC102547823 (LOC102547823), ncRNA [XR_600925]
A_44_P1081915	0.010111703	down	2.3434846	-2.3434846	-1.2286553	Slc17a3	Rattus norvegicus solute carrier family 17 member 3 (Slc17a3), mRNA [NM_153622]
A_43_P10257	0.010126154	down	2.3430703	-2.3430703	-1.2284002	Vkorc1	Rattus norvegicus vitamin K epoxide reductase complex, subunit 1 (Vkorc1), mRNA [NM_203335]
A_64_P021686	0.018730907	up	2.3426824	2.3426824	1.2281613	Epor	Rattus norvegicus erythropoietin receptor (Epor), mRNA [NM_017002]
A_44_P1138098	0.022392318	up	2.3419752	2.3419752	1.2277257	LOC108348571	PREDICTED: Rattus norvegicus uncharacterized LOC108348571 (LOC108348571), ncRNA [XR_001834319]
A_64_P068252	0.01999317	up	2.3418326	2.3418326	1.227638		family with sequence similarity 179, member A [Source:RGD Symbol;Acc:1310677] [ENSRNOT00000036374]
A_44_P1097193	0.0057767145	down	2.3415391	-2.3415391	-1.2274572
A_44_P696994	0.0041788477	down	2.3401623	-2.3401623	-1.2266085	Ifit2	Rattus norvegicus interferon-induced protein with tetratricopeptide repeats 2 (Ifit2), mRNA [NM_001024753]
A_64_P123804	0.016723074	down	2.3395236	-2.3395236	-1.2262148	Clec4a2	Rattus norvegicus C-type lectin domain family 4, member A2 (Clec4a2), mRNA [NM_001005880]
A_44_P1359694	0.03353219	up	2.3373613	2.3373613	1.2248808	Garem1	PREDICTED: Rattus norvegicus GRB2 associated regulator of MAPK1, member 1 (Garem1), transcript variant X1, mRNA [XM_006254485]
A_64_P036410	0.013502525	down	2.3365293	-2.3365293	-1.2243671	Paqr9	Rattus norvegicus progestin and adipoQ receptor family member 9 (Paqr9), mRNA [NM_001271152]
A_44_P272253	0.009625757	down	2.3343341	-2.3343341	-1.223011	LOC288978	Rattus norvegicus hypothetical LOC288978 (LOC288978), mRNA [NM_001134500]
A_44_P1139930	0.015840242	up	2.3337724	2.3337724	1.2226639	LOC103690394	PREDICTED: Rattus norvegicus uncharacterized LOC103690394 (LOC103690394), mRNA [XM_017588006]
A_44_P335770	0.010603751	down	2.3337045	-2.3337045	-1.2226219	Stxbp4	Rattus norvegicus syntaxin binding protein 4 (Stxbp4), mRNA [NM_001107038]
A_44_P807628	0.04915669	up	2.3329637	2.3329637	1.2221638	Gpatch2	PREDICTED: Rattus norvegicus G patch domain containing 2 (Gpatch2), transcript variant X3, mRNA [XM_008769839]
A_44_P1154306	0.02337947	up	2.332038	2.332038	1.2215912
A_44_P1370479	0.010075429	down	2.33147	-2.33147	-1.2212398	Rassf10	Ras association domain family member 10 [Source:RGD Symbol;Acc:1309847] [ENSRNOT00000037185]
A_44_P1092251	0.0036987204	down	2.3299673	-2.3299673	-1.2203096	LOC100363520	PREDICTED: Rattus norvegicus mCG16729-like (LOC100363520), transcript variant X7, mRNA [XM_017594043]
A_44_P1128501	0.0037444266	up	2.3297093	2.3297093	1.2201499	LOC102551574	PREDICTED: Rattus norvegicus uncharacterized LOC102551574 (LOC102551574), ncRNA [XR_348047]
A_44_P438701	0.03685261	down	2.3284338	-2.3284338	-1.2193599	C1ql2	Rattus norvegicus complement C1q like 2 (C1ql2), mRNA [NM_001105949]
A_64_P009658	0.0043646083	up	2.3279672	2.3279672	1.2190707	LOC317356	PREDICTED: Rattus norvegicus similar to protocadherin alpha 13 (LOC317356), mRNA [XM_006256688]
A_44_P1106197	0.008537322	down	2.3270204	-2.3270204	-1.2184838	Clcn6	chloride voltage-gated channel 6 [Source:RGD Symbol;Acc:1305379] [ENSRNOT00000011287]
A_44_P1103600	0.0063299327	up	2.3253384	2.3253384	1.2174406
A_44_P1094060	0.012553578	up	2.3252642	2.3252642	1.2173946	Atxn7l1	PREDICTED: Rattus norvegicus ataxin 7-like 1 (Atxn7l1), transcript variant X2, mRNA [XM_008764632]
A_44_P960333	0.0033962983	up	2.32453	2.32453	1.216939	Mpzl2	Rattus norvegicus myelin protein zero-like 2 (Mpzl2), mRNA [NM_001106818]
A_44_P1123957	0.03374501	up	2.3231504	2.3231504	1.2160826
A_43_P12598	0.010453391	up	2.323048	2.323048	1.216019	Npy4r	Rattus norvegicus neuropeptide Y receptor Y4 (Npy4r), mRNA [NM_031581]
A_64_P158883	0.0031650835	up	2.3225803	2.3225803	1.2157285	Mxd1	Rattus norvegicus max dimerization protein 1 (Mxd1), mRNA [NM_001100749]
A_44_P1095569	0.0064309053	down	2.321734	-2.321734	-1.2152027	Nlrc3	PREDICTED: Rattus norvegicus NLR family, CARD domain containing 3 (Nlrc3), transcript variant X1, mRNA [XM_006220565]
A_44_P1159904	0.044459026	up	2.3208282	2.3208282	1.2146397	Palm	Rattus norvegicus paralemmin (Palm), mRNA [NM_130829]
A_42_P824256	0.034565117	up	2.3199146	2.3199146	1.2140716	Rapgef4	PREDICTED: Rattus norvegicus Rap guanine nucleotide exchange factor 4 (Rapgef4), transcript variant X2, mRNA [XM_001060956]
A_44_P295654	0.0041845404	up	2.3193192	2.3193192	1.2137014		AGENCOURT_112412843 NIH_MGC_429 Rattus norvegicus cDNA clone IMAGE:9029418 5', mRNA sequence [EV773016]
A_64_P109337	0.021086277	up	2.319248	2.319248	1.213657	LOC100909893	PREDICTED: Rattus norvegicus protein FAM187B-like (LOC100909893), transcript variant X1, mRNA [XM_003748831]
A_44_P1095654	0.035909694	down	2.319153	-2.319153	-1.213598	RGD1561277	PREDICTED: Rattus norvegicus RGD1561277 (RGD1561277), mRNA [XM_006220995]
A_64_P103537	0.021191988	down	2.3183265	-2.3183265	-1.2130837	Cftr	Rattus norvegicus cystic fibrosis transmembrane conductance regulator (Cftr), mRNA [NM_031506]
A_44_P1124346	0.004331144	down	2.3179603	-2.3179603	-1.2128558	LOC102553072	PREDICTED: Rattus norvegicus uncharacterized LOC102553072 (LOC102553072), ncRNA [XR_346085]
A_43_P10413	0.021613741	up	2.3170717	2.3170717	1.2123027	Pink1	Rattus norvegicus PTEN induced putative kinase 1 (Pink1), mRNA [NM_001106694]
A_44_P107634	0.0034124192	down	2.3164089	-2.3164089	-1.2118899	Haus4	Rattus norvegicus HAUS augmin-like complex, subunit 4 (Haus4), mRNA [NM_001013995]
A_64_P001774	0.0031462817	up	2.3163013	2.3163013	1.211823	Fads6	Rattus norvegicus fatty acid desaturase 6 (Fads6), mRNA [NM_001107064]
A_44_P1080270	0.002950069	up	2.3157108	2.3157108	1.2114551	Gtpbp4	Rattus norvegicus GTP binding protein 4 (Gtpbp4), mRNA [NM_053689]
A_64_P144133	0.0057678423	down	2.313896	-2.313896	-1.2103239	RGD1566029	similar to mKIAA1644 protein [Source:RGD Symbol;Acc:1566029] [ENSRNOT00000084666]
A_44_P1107468	0.012879593	up	2.313407	2.313407	1.2100191
A_44_P1096661	0.007626979	down	2.3113067	-2.3113067	-1.2087088	Mmab	methylmalonic aciduria (cobalamin deficiency) cblB type [Source:RGD Symbol;Acc:1596242] [ENSRNOT00000072511]
A_43_P16306	0.0080053285	up	2.310891	2.310891	1.2084491
A_44_P1104933	0.004900884	up	2.3104856	2.3104856	1.208196	Prokr1	prokineticin receptor 1 [Source:RGD Symbol;Acc:708443] [ENSRNOT00000012913]
A_44_P1161646	0.00833722	down	2.3101993	-2.3101993	-1.2080172
A_44_P1111336	0.046616435	up	2.3090737	2.3090737	1.2073143	Gjc3	PREDICTED: Rattus norvegicus gap junction protein, gamma 3 (Gjc3), mRNA [XM_221997]
A_44_P1152332	0.016658498	down	2.308932	-2.308932	-1.2072257	Zranb3	zinc finger RANBP2-type containing 3 [Source:RGD Symbol;Acc:1564952] [ENSRNOT00000005355]
A_44_P100618	0.0071430136	down	2.3084846	-2.3084846	-1.206946		Rattus norvegicus similar to RIKEN cDNA 2310008M10 (LOC310613), mRNA [XM_227387]
A_64_P052745	0.020606713	down	2.3082156	-2.3082156	-1.2067779	Mcm3	Rattus norvegicus minichromosome maintenance complex component 3 (Mcm3), mRNA [NM_001191805]
A_44_P1155885	0.0053103105	up	2.307962	2.307962	1.2066194		leucine-rich repeats and IQ motif containing 4 [Source:RGD Symbol;Acc:2323202] [ENSRNOT00000011932]
A_44_P1083982	0.0054082046	down	2.3072963	-2.3072963	-1.2062032	Bora	Rattus norvegicus bora, aurora kinase A activator (Bora), mRNA [NM_001013997]
A_42_P497323	0.019692443	up	2.3070357	2.3070357	1.2060403	Ppp1r10	Rattus norvegicus protein phosphatase 1, regulatory subunit 10 (Ppp1r10), mRNA [NM_022951]
A_44_P1082508	0.013726502	down	2.3068345	-2.3068345	-1.2059145	Gpam	Rattus norvegicus glycerol-3-phosphate acyltransferase, mitochondrial (Gpam), mRNA [NM_017274]
A_44_P1157322	0.01040725	up	2.304684	2.304684	1.2045689	Etnppl	ethanolamine-phosphate phospho-lyase [Source:RGD Symbol;Acc:1590098] [ENSRNOT00000074209]
A_44_P1143900	0.011962048	down	2.3044739	-2.3044739	-1.2044374	Pomt1	Rattus norvegicus protein-O-mannosyltransferase 1 (Pomt1), mRNA [NM_053406]
A_64_P010618	0.008721233	up	2.304434	2.304434	1.2044125	Asf1a	Rattus norvegicus anti-silencing function 1A histone chaperone (Asf1a), mRNA [NM_001106389]
A_44_P1364088	0.0100675	up	2.303894	2.303894	1.2040744	Rab11fip5	RAB11 family interacting protein 5 [Source:RGD Symbol;Acc:1592069] [ENSRNOT00000086720]
A_42_P777285	0.017416071	up	2.3025355	2.3025355	1.2032233	Rell1	RELT-like 1 [Source:RGD Symbol;Acc:1307468] [ENSRNOT00000076611]
A_64_P155186	0.031882096	down	2.3025086	-2.3025086	-1.2032065	Aurka	Rattus norvegicus aurora kinase A (Aurka), mRNA [NM_153296]
A_44_P1123636	0.004766978	down	2.3018634	-2.3018634	-1.2028022	Insig1	Rattus norvegicus insulin induced gene 1 (Insig1), mRNA [NM_022392]
A_44_P1098086	0.009994062	up	2.3015141	2.3015141	1.2025833		interleukin 15 receptor subunit alpha [Source:RGD Symbol;Acc:1305149] [ENSRNOT00000025252]
A_44_P1362517	0.0060985656	down	2.3011703	-2.3011703	-1.2023678	Nt5c2	5'-nucleotidase, cytosolic II [Source:RGD Symbol;Acc:2323387] [ENSRNOT00000027351]
A_43_P15381	0.045726523	up	2.3005521	2.3005521	1.2019801	Fmo3	flavin containing monooxygenase 3 [Source:RGD Symbol;Acc:619761] [ENSRNOT00000004864]
A_64_P040038	0.0041230805	up	2.298987	2.298987	1.2009982	Gtpbp4	Rattus norvegicus GTP binding protein 4 (Gtpbp4), mRNA [NM_053689]
A_64_P103321	0.0069676754	down	2.2986383	-2.2986383	-1.2007794	Tubb2a	Rattus norvegicus tubulin, beta 2A class IIa (Tubb2a), mRNA [NM_001109119]
A_44_P411881	0.0067292545	down	2.2983325	-2.2983325	-1.2005875		FN801275 etcmemb Rattus norvegicus cDNA clone etcmembP0014B15, mRNA sequence [FN801275]
A_44_P119538	0.025748454	up	2.2974095	2.2974095	1.200008	S1pr4	Rattus norvegicus sphingosine-1-phosphate receptor 4 (S1pr4), mRNA [NM_001108075]
A_44_P1134573	0.012533447	up	2.2955809	2.2955809	1.1988592
A_44_P1145205	0.015897268	up	2.295495	2.295495	1.1988053	LOC103692427	PREDICTED: Rattus norvegicus uncharacterized LOC103692427 (LOC103692427), ncRNA [XR_592660]
A_44_P531870	0.0042083054	up	2.2953198	2.2953198	1.1986952	Ephx2	Rattus norvegicus epoxide hydrolase 2 (Ephx2), mRNA [NM_022936]
A_44_P317661	0.035538808	down	2.2950933	-2.2950933	-1.1985527		UI-R-CW0-bwj-f-12-0-UI.s1 UI-R-CW0 Rattus norvegicus cDNA clone UI-R-CW0-bwj-f-12-0-UI 3', mRNA sequence [BI274511]
A_64_P079256	0.0032456138	up	2.2945104	2.2945104	1.1981863	Fam170a	Rattus norvegicus family with sequence similarity 170, member A (Fam170a), mRNA [NM_001126293]
A_44_P854417	0.03210378	down	2.2942307	-2.2942307	-1.1980104	Ccdc141	coiled-coil domain containing 141 [Source:RGD Symbol;Acc:1593250] [ENSRNOT00000037015]
A_64_P114638	0.0038874191	up	2.294054	2.294054	1.1978993	Hspb2	Rattus norvegicus heat shock protein family B (small) member 2 (Hspb2), mRNA [NM_130431]
A_44_P1116610	0.029679283	up	2.2929323	2.2929323	1.1971937	Rbmy1j	RNA binding motif protein, Y-linked, family 1, member J [Source:RGD Symbol;Acc:9125062] [ENSRNOT00000092110]
A_43_P11333	0.0067202114	down	2.2921956	-2.2921956	-1.1967301	Hyou1	Rattus norvegicus hypoxia up-regulated 1 (Hyou1), transcript variant 1, mRNA [NM_138867]
A_43_P12345	0.039545044	down	2.2914267	-2.2914267	-1.1962461	Bche	Rattus norvegicus butyrylcholinesterase (Bche), mRNA [NM_022942]
A_44_P1147055	0.03862568	up	2.2912354	2.2912354	1.1961257	LOC103693167	PREDICTED: Rattus norvegicus uncharacterized LOC103693167 (LOC103693167), ncRNA [XR_594118]
A_64_P103238	0.0042917575	down	2.2910848	-2.2910848	-1.1960309	Zfp52	Rattus norvegicus zinc finger protein 52 (Zfp52), mRNA [NM_001014158]
A_44_P1081895	0.01122453	up	2.2907233	2.2907233	1.1958032	Gca	Rattus norvegicus grancalcin (Gca), mRNA [NM_001106483]
A_44_P1000888	0.03077319	down	2.289765	-2.289765	-1.1951995	Plac9	Rattus norvegicus placenta-specific 9 (Plac9), mRNA [NM_001108395]
A_44_P238421	0.021117903	down	2.2896912	-2.2896912	-1.195153	Col1a1	Rattus norvegicus collagen type I alpha 1 chain (Col1a1), mRNA [NM_053304]
A_44_P1097898	0.031985704	up	2.2895515	2.2895515	1.195065	LOC103694932	PREDICTED: Rattus norvegicus uncharacterized LOC103694932 (LOC103694932), mRNA [XM_008773946]
A_44_P1151729	0.01972761	down	2.2882829	-2.2882829	-1.1942654	Olr1682	Rattus norvegicus olfactory receptor 1682 (Olr1682), mRNA [NM_001000890]
A_44_P157167	0.005929666	up	2.2876241	2.2876241	1.19385	Eif4b	Rattus norvegicus eukaryotic translation initiation factor 4B (Eif4b), mRNA [NM_001008324]
A_44_P204207	0.0036519067	down	2.2847712	-2.2847712	-1.1920497	Smyd4	Rattus norvegicus SET and MYND domain containing 4 (Smyd4), mRNA [NM_001105810]
A_64_P029486	0.011473924	up	2.2845697	2.2845697	1.1919224	Tnnc2	Rattus norvegicus troponin C2, fast skeletal type (Tnnc2), mRNA [NM_001037351]
A_44_P1117335	0.042101126	down	2.2843795	-2.2843795	-1.1918023	Acat2	Rattus norvegicus acetyl-CoA acetyltransferase 2 (Acat2), mRNA [NM_001006995]
A_44_P808666	0.003292593	up	2.2842615	2.2842615	1.1917278	Wt1	Rattus norvegicus Wilms tumor 1 (Wt1), mRNA [NM_031534]
A_64_P019505	0.01610584	up	2.2827961	2.2827961	1.190802	Mansc4	MANSC domain containing 4 [Source:RGD Symbol;Acc:1585055] [ENSRNOT00000055463]
A_44_P1152967	0.0072913724	down	2.282648	-2.282648	-1.1907084
A_44_P1092871	0.0046452074	down	2.2818463	-2.2818463	-1.1902016	LOC685574	PREDICTED: Rattus norvegicus zinc finger protein 334 (LOC685574), transcript variant X1, mRNA [XM_008762566]
A_43_P11022	0.0032451046	down	2.2816703	-2.2816703	-1.1900903		PREDICTED: Rattus norvegicus uncharacterized LOC100910433 (LOC100910433), misc_RNA [XR_146059]
A_44_P1152165	0.04241947	up	2.2812881	2.2812881	1.1898487		AGENCOURT_118982654 NIH_MGC_248 Rattus norvegicus cDNA clone IMAGE:9113781 5', mRNA sequence [EX488275]
A_44_P1085378	0.028457362	down	2.2806902	-2.2806902	-1.1894704	Ccdc34	Rattus norvegicus coiled-coil domain containing 34 (Ccdc34), mRNA [NM_001108587]
A_44_P884020	0.0037250987	up	2.280343	2.280343	1.1892508	Smim13	Rattus norvegicus small integral membrane protein 13 (Smim13), mRNA [NM_001135576]
A_44_P319354	0.008077322	down	2.279894	-2.279894	-1.1889668		EST189052 Normalized rat heart, Bento Soares Rattus sp. cDNA clone RHEAC49 3' end, mRNA sequence [AA799555]
A_44_P975327	0.036467575	up	2.2797651	2.2797651	1.1888852	B3gnt2	Rattus norvegicus UDP-GlcNAc:betaGal beta-1,3-N-acetylglucosaminyltransferase 2 (B3gnt2), mRNA [NM_001107240]
A_64_P152594	0.003905746	down	2.2781374	-2.2781374	-1.1878548	Sec61b	Rattus norvegicus Sec61 translocon beta subunit (Sec61b), mRNA [NM_001106654]
A_44_P170527	0.003904811	up	2.2779176	2.2779176	1.1877155	Fzd1	Rattus norvegicus frizzled class receptor 1 (Fzd1), mRNA [NM_021266]
A_44_P1083552	0.012611894	down	2.2759852	-2.2759852	-1.1864911	Itgb3bp	Rattus norvegicus integrin subunit beta 3 binding protein (Itgb3bp), mRNA [NM_001013213]
A_44_P221185	0.03472025	up	2.2755497	2.2755497	1.186215		UI-R-DR1-ckz-j-07-0-UI.s1 UI-R-DR1 Rattus norvegicus cDNA clone UI-R-DR1-ckz-j-07-0-UI 3', mRNA sequence [CN541542]
A_64_P128824	0.042200793	down	2.2749388	-2.2749388	-1.1858277	Stmn1	Rattus norvegicus stathmin 1 (Stmn1), mRNA [NM_017166]
A_44_P301963	0.008353082	down	2.274662	-2.274662	-1.1856521	Psmb9	Rattus norvegicus proteasome subunit beta 9 (Psmb9), mRNA [NM_012708]
A_44_P730882	0.03842683	up	2.2739615	2.2739615	1.1852078	Brwd1	bromodomain and WD repeat domain containing 1 [Source:RGD Symbol;Acc:1309030] [ENSRNOT00000002231]
A_44_P725710	0.023454245	up	2.2739289	2.2739289	1.1851871	Zbtb2	Rattus norvegicus zinc finger and BTB domain containing 2 (Zbtb2), mRNA [NM_001107460]
A_44_P1163444	0.010961065	up	2.273745	2.273745	1.1850705
A_64_P142540	0.010596966	down	2.2732136	-2.2732136	-1.1847333	RGD1561157	Rattus norvegicus RGD1561157 (RGD1561157), mRNA [NM_001134569]
A_44_P1101261	0.02489728	up	2.2730541	2.2730541	1.1846321	Rab30	PREDICTED: Rattus norvegicus RAB30, member RAS oncogene family (Rab30), transcript variant X4, mRNA [XM_008759647]
A_44_P1109414	0.0082895	down	2.272684	-2.272684	-1.1843971	LOC102549694	PREDICTED: Rattus norvegicus protein NYNRIN-like (LOC102549694), mRNA [XM_017603935]
A_64_P092209	0.008234334	down	2.2712312	-2.2712312	-1.1834745	Srebf2	Rattus norvegicus sterol regulatory element binding transcription factor 2 (Srebf2), mRNA [NM_001033694]
A_44_P1142689	0.02233074	up	2.2711513	2.2711513	1.1834238	LOC103691206	PREDICTED: Rattus norvegicus uncharacterized LOC103691206 (LOC103691206), transcript variant X1, ncRNA [XR_590409]
A_42_P656599	0.014601607	up	2.2706149	2.2706149	1.183083	Tat	tyrosine aminotransferase [Source:RGD Symbol;Acc:3820] [ENSRNOT00000022721]
A_44_P1092169	0.0047807647	up	2.270597	2.270597	1.1830716	LOC102550598	PREDICTED: Rattus norvegicus small proline-rich protein 2I-like (LOC102550598), transcript variant X1, mRNA [XM_006232816]
A_64_P116321	0.008052108	up	2.2693214	2.2693214	1.182261		similar to KIAA2026 protein [Source:RGD Symbol;Acc:1311595] [ENSRNOT00000039428]
A_44_P810585	0.011047027	down	2.2693117	-2.2693117	-1.1822548	LOC102553278	PREDICTED: Rattus norvegicus zinc finger protein 709-like (LOC102553278), transcript variant X2, mRNA [XM_006244216]
A_44_P122429	0.020694384	down	2.2690856	-2.2690856	-1.182111		BP488109 Rattus norvegicus insulinoma RINm5F Rattus norvegicus cDNA clone RI05196 3', mRNA sequence [BP488109]
A_44_P1365181	0.013325241	up	2.2676623	2.2676623	1.1812057	Zfp663	zinc finger protein 663 [Source:RGD Symbol;Acc:2318893] [ENSRNOT00000047890]
A_44_P1367244	0.01276412	down	2.2670574	-2.2670574	-1.180821		PREDICTED: Rattus norvegicus insulin-induced gene 1 protein pseudogene (LOC108350694), transcript variant X2, misc_RNA [XR_001843344]
A_44_P464145	0.01712428	down	2.2670283	-2.2670283	-1.1808025	Gpr155	Rattus norvegicus G protein-coupled receptor 155 (Gpr155), mRNA [NM_001107811]
A_42_P628409	0.007303209	down	2.2669885	-2.2669885	-1.1807771		PREDICTED: Rattus norvegicus uncharacterized LOC100912602 (LOC100912602), misc_RNA [XR_146341]
A_44_P776098	0.013481289	up	2.2666132	2.2666132	1.1805382		Q7TQ12_RAT (Q7TQ12) Aa1114, partial (12%) [TC616052]
A_44_P548257	0.003750283	down	2.2652414	-2.2652414	-1.1796647	Shisa4	BC044813 transmembrane protein 58 {Mus musculus} (exp=-1; wgp=0; cg=0), complete [TC587545]
A_44_P1088301	0.0072394502	down	2.2646291	-2.2646291	-1.1792748	Paqr9	Rattus norvegicus progestin and adipoQ receptor family member 9 (Paqr9), mRNA [NM_001271152]
A_44_P140557	0.021413108	down	2.264223	-2.264223	-1.1790161	Dock6	Rattus norvegicus dedicator of cytokinesis 6 (Dock6), mRNA [NM_001108997]
A_44_P597723	0.00526528	up	2.2624629	2.2624629	1.1778941	Ddi2	DNA-damage inducible protein 2 [Source:RGD Symbol;Acc:1311815] [ENSRNOT00000076160]
A_64_P039888	0.021514557	up	2.2601128	2.2601128	1.1763947	Abcb1b	Rattus norvegicus ATP-binding cassette, subfamily B (MDR/TAP), member 1B (Abcb1b), mRNA [NM_012623]
A_64_P153674	0.042976573	up	2.2594664	2.2594664	1.1759821	Mbnl3	Rattus norvegicus muscleblind-like splicing regulator 3 (Mbnl3), mRNA [NM_001106949]
A_64_P156319	0.033489227	up	2.2592742	2.2592742	1.1758593	LOC689064	Rattus norvegicus beta-globin (LOC689064), mRNA [NM_001111269]
A_44_P1118105	0.022549767	up	2.259112	2.259112	1.1757557	LOC102553462	PREDICTED: Rattus norvegicus uncharacterized LOC102553462 (LOC102553462), ncRNA [XR_343050]
A_44_P1145185	0.006689884	down	2.2583187	-2.2583187	-1.1752491
A_44_P902140	0.003915379	down	2.2582867	-2.2582867	-1.1752286		AGENCOURT_114385179 NIH_MGC_431 Rattus norvegicus cDNA clone IMAGE:9089453 5', mRNA sequence [EV775980]
A_44_P993914	0.007842982	up	2.2582328	2.2582328	1.1751943	Pdia5	Rattus norvegicus protein disulfide isomerase family A, member 5 (Pdia5), mRNA [NM_001014125]
A_44_P1093424	0.021655776	down	2.257725	-2.257725	-1.1748698	Nol6	PREDICTED: Rattus norvegicus nucleolar protein 6 (Nol6), transcript variant X1, mRNA [XM_006225241]
A_64_P050695	0.01719377	down	2.2573225	-2.2573225	-1.1746125	B3gnt3	Rattus norvegicus UDP-GlcNAc:betaGal beta-1,3-N-acetylglucosaminyltransferase 3 (B3gnt3), mRNA [NM_001106068]
A_44_P1359788	0.012657372	up	2.2570577	2.2570577	1.1744432
A_64_P082251	0.01677893	up	2.2565768	2.2565768	1.1741358		similar to RIKEN cDNA 4933406L09 [Source:RGD Symbol;Acc:1359720] [ENSRNOT00000085530]
A_44_P1370475	0.032407474	up	2.2558722	2.2558722	1.1736853		PREDICTED: Rattus norvegicus similar to nidogen 2 (LOC367597), transcript variant X1, mRNA [XM_006227043]
A_44_P1361960	0.0101710735	down	2.25558	-2.25558	-1.1734984
A_44_P1121440	0.013604663	up	2.2549288	2.2549288	1.1730819	LOC102547949	PREDICTED: Rattus norvegicus uncharacterized LOC102547949 (LOC102547949), transcript variant X1, ncRNA [XR_591400]
A_44_P1096641	0.02140108	up	2.2544377	2.2544377	1.1727676	Ksr2	PREDICTED: Rattus norvegicus kinase suppressor of ras 2 (Ksr2), transcript variant X3, mRNA [XM_017598535]
A_42_P761277	0.014196751	down	2.2527766	-2.2527766	-1.1717043	Tmem254	Rattus norvegicus transmembrane protein 254 (Tmem254), mRNA [NM_001008297]
A_43_P19648	0.0040639266	down	2.2521288	-2.2521288	-1.1712893	Nbea	PREDICTED: Rattus norvegicus neurobeachin (Nbea), transcript variant X10, mRNA [XM_006224132]
A_64_P146011	0.016043002	up	2.2520876	2.2520876	1.171263
A_42_P453171	0.007119742	down	2.2516468	-2.2516468	-1.1709805	Cdc42ep4	Rattus norvegicus CDC42 effector protein 4 (Cdc42ep4), mRNA [NM_001107063]
A_44_P1158532	0.012827561	up	2.2509544	2.2509544	1.1705368
A_44_P1363629	0.003733	down	2.2501209	-2.2501209	-1.1700025	LOC100909688	zinc finger protein 43-like [Source:RGD Symbol;Acc:6502425] [ENSRNOT00000075247]
A_44_P1112597	0.015443985	up	2.2500436	2.2500436	1.169953	Ccdc158	PREDICTED: Rattus norvegicus coiled-coil domain containing 158 (Ccdc158), transcript variant X9, mRNA [XM_008770094]
A_44_P1096746	0.026706437	down	2.248856	-2.248856	-1.1691914	Nckap5	PREDICTED: Rattus norvegicus NCK-associated protein 5 (Nckap5), transcript variant X7, mRNA [XM_008761432]
A_44_P638987	0.032667156	up	2.2485523	2.2485523	1.1689965		RVL7460 Wackym-Soares normalized rat vestibular cDNA library Rattus norvegicus cDNA 5', mRNA sequence [DV717005]
A_44_P1126537	0.041594997	down	2.2471642	-2.2471642	-1.1681056	LOC102553891	PREDICTED: Rattus norvegicus uncharacterized LOC102553891 (LOC102553891), transcript variant X2, ncRNA [XR_347123]
A_64_P023481	0.025516102	up	2.2470582	2.2470582	1.1680374	Pcdhga4	protocadherin gamma subfamily A, 4 [Source:RGD Symbol;Acc:620725] [ENSRNOT00000067185]
A_44_P342187	0.017619746	up	2.245754	2.245754	1.1671999	S1pr2	Rattus norvegicus sphingosine-1-phosphate receptor 2 (S1pr2), mRNA [NM_017192]
A_44_P1112691	0.02629496	down	2.2450438	-2.2450438	-1.1667435	Bend4	PREDICTED: Rattus norvegicus BEN domain containing 4 (Bend4), transcript variant X2, mRNA [XM_008770166]
A_42_P751562	0.03406222	up	2.244171	2.244171	1.1661825	Mettl7a	Rattus norvegicus methyltransferase like 7A (Mettl7a), mRNA [NM_001037355]
A_44_P1081460	0.004207307	up	2.241346	2.241346	1.1643653	Klhl24	Rattus norvegicus kelch-like family member 24 (Klhl24), mRNA [NM_181473]
A_44_P231243	0.01833123	up	2.2411659	2.2411659	1.1642494	Insig2	Rattus norvegicus insulin induced gene 2 (Insig2), mRNA [NM_178091]
A_64_P005238	0.007597335	down	2.241005	-2.241005	-1.1641458	LOC100910615	PREDICTED: Rattus norvegicus allatostatin-A receptor-like (LOC100910615), mRNA [XM_003751935]
A_44_P1370935	0.006892105	down	2.2408388	-2.2408388	-1.1640388	Ska2	Rattus norvegicus spindle and kinetochore associated complex subunit 2 (Ska2), mRNA [NM_001009624]
A_44_P1130897	0.0034868715	down	2.2407577	-2.2407577	-1.1639867	LOC102547942	PREDICTED: Rattus norvegicus uncharacterized LOC102547942 (LOC102547942), transcript variant X1, ncRNA [XR_357220]
A_44_P1111456	0.011557104	up	2.2402017	2.2402017	1.1636286	Cldn15	claudin 15 [Source:RGD Symbol;Acc:1310678] [ENSRNOT00000001923]
A_43_P11431	0.014262319	up	2.2401073	2.2401073	1.1635678	Ing5	inhibitor of growth family, member 5 [Source:RGD Symbol;Acc:1307908] [ENSRNOT00000025683]
A_44_P1091566	0.0051118154	up	2.2397928	2.2397928	1.1633652
A_44_P363814	0.0037068261	up	2.239341	2.239341	1.1630743	Sun2	PREDICTED: Rattus norvegicus Sad1 and UNC84 domain containing 2 (Sun2), transcript variant X2, mRNA [XM_235483]
A_44_P1369009	0.024897026	up	2.2392824	2.2392824	1.1630365
A_42_P736530	0.005186933	down	2.239186	-2.239186	-1.1629744	RGD1563091	similar to OEF2 [Source:RGD Symbol;Acc:1563091] [ENSRNOT00000084021]
A_44_P1080852	0.009946852	up	2.238448	2.238448	1.1624987	LOC100361793	Rattus norvegicus keratin associated protein 12-1-like (LOC100361793), mRNA [NM_001271304]
A_44_P1361978	0.00800909	down	2.2383616	-2.2383616	-1.162443	Hectd4	HECT domain E3 ubiquitin protein ligase 4 [Source:RGD Symbol;Acc:1309762] [ENSRNOT00000001826]
A_64_P120085	0.028854828	up	2.2380672	2.2380672	1.1622533	Sowahb	sosondowah ankyrin repeat domain family member B [Source:RGD Symbol;Acc:1311994] [ENSRNOT00000002995]
A_43_P15937	0.017974494	up	2.23788	2.23788	1.1621326	Acsm3	Rattus norvegicus acyl-CoA synthetase medium-chain family member 3 (Acsm3), mRNA [NM_033231]
A_44_P1097858	0.013225287	up	2.237341	2.237341	1.1617851	Simc1	PREDICTED: Rattus norvegicus SUMO-interacting motifs containing 1 (Simc1), transcript variant X3, mRNA [XM_008773933]
A_44_P537143	0.009200437	down	2.2359383	-2.2359383	-1.1608803		EST230245 Normalized rat kidney, Bento Soares Rattus sp. cDNA clone RKIDH08 3' end, mRNA sequence [AI233557]
A_44_P144988	0.04480392	down	2.2358801	-2.2358801	-1.1608428	Fam13a	Rattus norvegicus family with sequence similarity 13, member A (Fam13a), mRNA [NM_001100862]
A_44_P1105962	0.0047814893	up	2.2347565	2.2347565	1.1601176	Fyb2	PREDICTED: Rattus norvegicus similar to novel protein (RGD1564074), transcript variant X2, mRNA [XM_017593779]
A_44_P504331	0.043581266	up	2.2332635	2.2332635	1.1591535		UI-R-EP0-coe-d-21-0-UI.s1 UI-R-EP0 Rattus norvegicus cDNA clone UI-R-EP0-coe-d-21-0-UI 3', mRNA sequence [CN544692]
A_43_P19169	0.004627067	up	2.2323415	2.2323415	1.1585578	Dcbld1	discoidin, CUB and LCCL domain containing 1 [Source:RGD Symbol;Acc:1307211] [ENSRNOT00000000462]
A_44_P1108098	0.011206204	down	2.2305477	-2.2305477	-1.157398	LOC100911068	PREDICTED: Rattus norvegicus roundabout homolog 4-like (LOC100911068), transcript variant X1, mRNA [XM_008766079]
A_44_P1082284	0.037457768	down	2.2303538	-2.2303538	-1.1572726	Emp1	Rattus norvegicus epithelial membrane protein 1 (Emp1), mRNA [NM_012843]
A_44_P1363205	0.0068523777	up	2.2303233	2.2303233	1.1572528
A_44_P388763	0.009496771	up	2.2301404	2.2301404	1.1571345	Olr1535	Rattus norvegicus olfactory receptor 1535 (Olr1535), mRNA [NM_001000945]
A_44_P1082838	0.013593665	down	2.230011	-2.230011	-1.1570508	Snx7	Rattus norvegicus sorting nexin 7 (Snx7), mRNA [NM_001012083]
A_64_P134873	0.02590734	down	2.229346	-2.229346	-1.1566205	Zik1	zinc finger protein interacting with K protein 1 [Source:RGD Symbol;Acc:1590949] [ENSRNOT00000090337]
A_44_P1359971	0.005121519	up	2.2288494	2.2288494	1.1562991	Bfar	Rattus norvegicus bifunctional apoptosis regulator (Bfar), transcript variant 2, non-coding RNA [NR_138253]
A_44_P1094830	0.009471175	up	2.2279503	2.2279503	1.155717
A_42_P706904	0.021169947	down	2.2278624	-2.2278624	-1.15566	Tfpi	Rattus norvegicus tissue factor pathway inhibitor (Tfpi), transcript variant 1, mRNA [NM_017200]
A_44_P1149120	0.013249313	down	2.2275848	-2.2275848	-1.1554804
A_64_P031046	0.019255744	up	2.2271957	2.2271957	1.1552284	Draxin	dorsal inhibitory axon guidance protein [Source:RGD Symbol;Acc:1585098] [ENSRNOT00000012080]
A_42_P564637	0.0049856678	up	2.2252395	2.2252395	1.1539606	LOC100910069	PREDICTED: Rattus norvegicus uncharacterized LOC100910069 (LOC100910069), mRNA [XM_017596110]
A_42_P673905	0.022931261	down	2.224614	-2.224614	-1.1535549	Mrnip	Rattus norvegicus MRN complex interacting protein (Mrnip), mRNA [NM_001109030]
A_44_P1149428	0.029671911	down	2.2244315	-2.2244315	-1.1534367
A_44_P1105120	0.04467512	up	2.2241414	2.2241414	1.1532484	Cecr2	PREDICTED: Rattus norvegicus CECR2, histone acetyl-lysine reader (Cecr2), transcript variant X1, mRNA [XM_008763251]
A_44_P1141228	0.026308559	down	2.223013	-2.223013	-1.1525164		tubulin alpha-1C chain-like [Source:RGD Symbol;Acc:6490604] [ENSRNOT00000093035]
A_44_P144237	0.0140448045	down	2.2228622	-2.2228622	-1.1524185	Erp29	Rattus norvegicus endoplasmic reticulum protein 29 (Erp29), mRNA [NM_053961]
A_42_P454311	0.0041946652	down	2.222425	-2.222425	-1.1521347	Dixdc1	Rattus norvegicus DIX domain containing 1 (Dixdc1), mRNA [NM_001037654]
A_64_P038419	0.006976839	down	2.2217796	-2.2217796	-1.1517156	Comt	Rattus norvegicus catechol-O-methyltransferase (Comt), mRNA [NM_012531]
A_44_P515484	0.009439153	up	2.2216623	2.2216623	1.1516395	Tat	Rattus norvegicus tyrosine aminotransferase (Tat), mRNA [NM_012668]
A_44_P1134835	0.010561477	down	2.2212987	-2.2212987	-1.1514034		FQ106286 Rattus norvegicus liver Sprague-Dawley Rattus norvegicus cDNA 5', mRNA sequence [FQ106286]
A_64_P159608	0.008575816	down	2.2200532	-2.2200532	-1.1505942	Chml	Rattus norvegicus CHM like, Rab escort protein 2 (Chml), mRNA [NM_001109524]
A_44_P758470	0.02739429	down	2.2198682	-2.2198682	-1.150474	Vopp1	Rattus norvegicus vesicular, overexpressed in cancer, prosurvival protein 1 (Vopp1), mRNA [NM_001108630]
A_44_P1111016	0.012153742	up	2.218757	2.218757	1.1497515	Gramd1c	PREDICTED: Rattus norvegicus GRAM domain containing 1C (Gramd1c), transcript variant X1, mRNA [XM_008768766]
A_44_P102265	0.028094506	up	2.2186873	2.2186873	1.1497064		EST224623 Normalized rat brain, Bento Soares Rattus sp. cDNA clone RBRCN70 3' end, mRNA sequence [AI227928]
A_44_P1140491	0.004018303	up	2.21615	2.21615	1.1480556	LOC102555396	PREDICTED: Rattus norvegicus uncharacterized LOC102555396 (LOC102555396), transcript variant X3, ncRNA [XR_597467]
A_43_P12328	0.008695741	up	2.215943	2.215943	1.1479208	Ireb2	PREDICTED: Rattus norvegicus iron responsive element binding protein 2 (Ireb2), transcript variant X1, mRNA [XM_006243091]
A_43_P13290	0.027233789	up	2.2152228	2.2152228	1.1474518	Pbld1	Rattus norvegicus phenazine biosynthesis-like protein domain containing 1 (Pbld1), mRNA [NM_138530]
A_42_P536292	0.018803488	up	2.2149153	2.2149153	1.1472515	Ngb	Rattus norvegicus neuroglobin (Ngb), mRNA [NM_033359]
A_44_P1105398	0.01775238	up	2.2142105	2.2142105	1.1467924	Crispld1	PREDICTED: Rattus norvegicus cysteine-rich secretory protein LCCL domain containing 1 (Crispld1), transcript variant X2, mRNA [XM_008763478]
A_64_P142333	0.019502789	up	2.2138224	2.2138224	1.1465394	Rbm15	PREDICTED: Rattus norvegicus RNA binding motif protein 15 (Rbm15), mRNA [XM_001068152]
A_44_P717825	0.0067419643	down	2.2132728	-2.2132728	-1.1461812	Nt5c2	PREDICTED: Rattus norvegicus 5'-nucleotidase, cytosolic II (Nt5c2), transcript variant X5, mRNA [XM_017589894]
A_64_P119154	0.022171032	up	2.2119784	2.2119784	1.1453373	Olr619	Rattus norvegicus olfactory receptor 619 (Olr619), mRNA [NM_001000338]
A_44_P837289	0.008091513	down	2.210071	-2.210071	-1.1440928	RGD1561413	PREDICTED: Rattus norvegicus similar to BC021442 protein (RGD1561413), transcript variant X1, mRNA [XM_008764330]
A_44_P822920	0.02368356	down	2.2099605	-2.2099605	-1.1440206	Tomm40l	PREDICTED: Rattus norvegicus translocase of outer mitochondrial membrane 40 like (Tomm40l), transcript variant X1, mRNA [XM_006250247]
A_43_P13064	0.013877249	up	2.2094696	2.2094696	1.1437	Klf9	Rattus norvegicus Kruppel-like factor 9 (Klf9), mRNA [NM_057211]
A_43_P17411	0.04301543	up	2.2093415	2.2093415	1.1436164	Ell2	elongation factor for RNA polymerase II 2 [Source:RGD Symbol;Acc:1309296] [ENSRNOT00000032974]
A_44_P1086410	0.028617164	down	2.2081308	-2.2081308	-1.1428256	Tp53inp1	Rattus norvegicus tumor protein p53 inducible nuclear protein 1 (Tp53inp1), mRNA [NM_181084]
A_44_P1137696	0.023940867	up	2.2070515	2.2070515	1.1421202	LOC102548125	PREDICTED: Rattus norvegicus uncharacterized LOC102548125 (LOC102548125), transcript variant X3, ncRNA [XR_001834196]
A_44_P1156107	0.005527786	down	2.2066152	-2.2066152	-1.1418351	Bcl6b	Rattus norvegicus B-cell CLL/lymphoma 6B (Bcl6b), mRNA [NM_001108279]
A_43_P15037	0.0046189455	up	2.2062151	2.2062151	1.1415734	LOC102552369	PREDICTED: Rattus norvegicus uncharacterized LOC102552369 (LOC102552369), ncRNA [XR_001845217]
A_64_P015460	0.043628078	down	2.2061713	-2.2061713	-1.1415448	Ccl4	Rattus norvegicus C-C motif chemokine ligand 4 (Ccl4), mRNA [NM_053858]
A_44_P490484	0.021058282	up	2.2044415	2.2044415	1.1404132	Klf6	Rattus norvegicus Kruppel-like factor 6 (Klf6), mRNA [NM_031642]
A_64_P067447	0.004526801	up	2.2043498	2.2043498	1.1403531	Acot4	Rattus norvegicus acyl-CoA thioesterase 4 (Acot4), mRNA [NM_001109440]
A_64_P109984	0.02683532	up	2.2038908	2.2038908	1.1400527	Srcin1	Rattus norvegicus SRC kinase signaling inhibitor 1 (Srcin1), mRNA [NM_019378]
A_44_P1146900	0.018707838	up	2.2027943	2.2027943	1.1393348	LOC103693117	PREDICTED: Rattus norvegicus uncharacterized LOC103693117 (LOC103693117), transcript variant X1, ncRNA [XR_593966]
A_64_P085053	0.01169417	down	2.2025197	-2.2025197	-1.1391549	Scly	Rattus norvegicus selenocysteine lyase (Scly), mRNA [NM_001007755]
A_44_P494470	0.03086387	down	2.2022426	-2.2022426	-1.1389734	Ccdc66	coiled-coil domain containing 66 [Source:RGD Symbol;Acc:1560873] [ENSRNOT00000039311]
A_64_P074332	0.0061180913	down	2.2009661	-2.2009661	-1.1381369	Manf	Rattus norvegicus mesencephalic astrocyte-derived neurotrophic factor (Manf), mRNA [NM_001108183]
A_42_P843373	0.0050200694	down	2.2008402	-2.2008402	-1.1380544	Rslcan18	PREDICTED: Rattus norvegicus regulator of sex-limitation candidate 18 (Rslcan18), transcript variant X1, mRNA [XM_008760963]
A_44_P201729	0.016101334	up	2.2008162	2.2008162	1.1380386	Ddi2	Rattus norvegicus DNA-damage inducible protein 2 (Ddi2), mRNA [NM_001034149]
A_64_P025007	0.005634358	down	2.2003884	-2.2003884	-1.1377583	Ctps1	Rattus norvegicus CTP synthase 1 (Ctps1), mRNA [NM_001134873]
A_44_P1138391	0.015497122	up	2.2003593	2.2003593	1.1377392
A_44_P407138	0.007997931	down	2.199636	-2.199636	-1.1372647	Nme1	Rattus norvegicus NME/NM23 nucleoside diphosphate kinase 1 (Nme1), mRNA [NM_138548]
A_44_P250143	0.032430008	up	2.1993418	2.1993418	1.1370718	Kif13b	Rattus norvegicus kinesin family member 13B (Kif13b), mRNA [NM_213626]
A_44_P1114745	0.009349747	up	2.19934	2.19934	1.1370707	Ammecr1l	PREDICTED: Rattus norvegicus AMMECR1 like (Ammecr1l), transcript variant X5, mRNA [XM_008772042]
A_44_P1093504	0.011444652	up	2.1982665	2.1982665	1.1363662	LOC102556734	PREDICTED: Rattus norvegicus igE-binding protein-like (LOC102556734), partial mRNA [XM_017588108]
A_64_P095900	0.018056586	down	2.1978068	-2.1978068	-1.1360645	Rgs12	Rattus norvegicus regulator of G-protein signaling 12 (Rgs12), mRNA [NM_019339]
A_44_P1084964	0.009374893	up	2.1974947	2.1974947	1.1358597	Bmp5	Rattus norvegicus bone morphogenetic protein 5 (Bmp5), mRNA [NM_001108168]
A_44_P1141764	0.0071441554	up	2.1968067	2.1968067	1.1354079	LOC691414	PREDICTED: Rattus norvegicus hypothetical protein LOC691414 (LOC691414), transcript variant X5, mRNA [XM_017596696]
A_42_P597638	0.0150174415	up	2.1953108	2.1953108	1.1344252	Acot2	Rattus norvegicus acyl-CoA thioesterase 2 (Acot2), mRNA [NM_138907]
A_44_P901483	0.021829553	down	2.1948786	-2.1948786	-1.1341411	Mrgprg	Q5NA53_ORYSA (Q5NA53) Glycogenin-like protein, partial (3%) [TC634117]
A_64_P043808	0.036277324	up	2.1932068	2.1932068	1.1330419	Olr1714	Rattus norvegicus olfactory receptor 1714 (Olr1714), mRNA [NM_214456]
A_64_P124858	0.0189549	up	2.1930304	2.1930304	1.1329257
A_44_P708169	0.017303491	up	2.1930048	2.1930048	1.1329089		UI-R-EP0-cob-l-22-0-UI.s1 UI-R-EP0 Rattus norvegicus cDNA clone UI-R-EP0-cob-l-22-0-UI 3', mRNA sequence [BQ205921]
A_44_P1150729	0.021902587	up	2.1908793	2.1908793	1.13151
A_44_P110252	0.017796323	down	2.1907105	-2.1907105	-1.1313989	Szt2	seizure threshold 2 homolog (mouse) [Source:RGD Symbol;Acc:1308616] [ENSRNOT00000039235]
A_64_P128458	0.02615771	up	43497	2019-02-01	1.1647218	Tg	Rattus norvegicus thyroglobulin (Tg), transcript variant 1, mRNA [NM_030988]
A_44_P189326	0.005251993	down	2.1896505	-2.1896505	-1.1307006	Pdia3	Rattus norvegicus protein disulfide isomerase family A, member 3 (Pdia3), mRNA [NM_017319]
A_64_P085732	0.038597185	down	2.1883633	-2.1883633	-1.1298523	Arhgef9	Rattus norvegicus Cdc42 guanine nucleotide exchange factor 9 (Arhgef9), mRNA [NM_023957]
A_44_P1137016	0.025929468	up	2.1874986	2.1874986	1.1292821	LOC102554462	PREDICTED: Rattus norvegicus uncharacterized LOC102554462 (LOC102554462), ncRNA [XR_341121]
A_44_P1095614	0.007783861	down	2.1872187	-2.1872187	-1.1290975	LOC100910596	PREDICTED: Rattus norvegicus uncharacterized LOC100910596 (LOC100910596), transcript variant X1, mRNA [XM_006220624]
A_44_P1091740	0.032486357	up	2.1860132	2.1860132	1.1283021	Ell2	PREDICTED: Rattus norvegicus elongation factor for RNA polymerase II 2 (Ell2), transcript variant X1, mRNA [XM_001054852]
A_44_P531758	0.004089033	down	2.1835911	-2.1835911	-1.1267027	Cryab	Rattus norvegicus crystallin, alpha B (Cryab), mRNA [NM_012935]
A_43_P11685	0.03999847	down	2.1834939	-2.1834939	-1.1266384	Id2	Rattus norvegicus inhibitor of DNA binding 2, HLH protein (Id2), mRNA [NM_013060]
A_43_P16898	0.007070952	down	2.1821783	-2.1821783	-1.1257689	Rpa1	replication protein A1 [Source:RGD Symbol;Acc:1307376] [ENSRNOT00000090262]
A_64_P034094	0.00508016	up	2.1816738	2.1816738	1.1254354	Olr35	Rattus norvegicus olfactory receptor 35 (Olr35), mRNA [NM_001000121]
A_64_P150519	0.009424481	down	2.1815386	-2.1815386	-1.125346	Drd4	Rattus norvegicus dopamine receptor D4 (Drd4), mRNA [NM_012944]
A_44_P1138396	0.0050825924	down	2.180828	-2.180828	-1.124876
A_64_P120564	0.008065863	down	2.180585	-2.180585	-1.1247152	Zfp90	Rattus norvegicus zinc finger protein 90 (Zfp90), mRNA [NM_001025765]
A_44_P1146518	0.0042906767	down	2.179788	-2.179788	-1.124188	LOC102550959	PREDICTED: Rattus norvegicus uncharacterized LOC102550959 (LOC102550959), transcript variant X1, ncRNA [XR_355877]
A_44_P1149266	0.006873518	up	2.1777556	2.1777556	1.1228421
A_44_P1370909	0.017377326	up	2.1771817	2.1771817	1.1224618		F178198S09 MMSET type I {Homo sapiens} (exp=-1; wgp=0; cg=0), partial (31%) [TC611983]
A_44_P1094085	0.009078078	up	2.1770372	2.1770372	1.1223661
A_44_P1115817	0.00928253	down	2.1769037	-2.1769037	-1.1222776	Rab36	PREDICTED: Rattus norvegicus RAB36, member RAS oncogene family (Rab36), transcript variant X1, mRNA [XM_006256342]
A_64_P050358	0.011611789	up	2.1756783	2.1756783	1.1214652	Lypd6	LY6/PLAUR domain containing 6 [Source:RGD Symbol;Acc:1587119] [ENSRNOT00000059588]
A_43_P10083	0.014493001	up	2.1754608	2.1754608	1.121321	Rgma	Rattus norvegicus repulsive guidance molecule family member A (Rgma), mRNA [NM_001107524]
A_64_P074544	0.022941578	up	2.175379	2.175379	1.1212668	Ankrd61	Rattus norvegicus ankyrin repeat domain 61 (Ankrd61), mRNA [NM_001044297]
A_44_P506043	0.023959972	down	2.174932	-2.174932	-1.1209702	Gimap4	Rattus norvegicus GTPase, IMAP family member 4 (Gimap4), mRNA [NM_173153]
A_44_P606193	0.017749285	down	2.174474	-2.174474	-1.1206665	Faxc	Rattus norvegicus failed axon connections homolog (Faxc), mRNA [NM_001271065]
A_44_P1111471	0.048469063	up	2.1738214	2.1738214	1.1202334	Rabgef1	PREDICTED: Rattus norvegicus RAB guanine nucleotide exchange factor 1 (Rabgef1), transcript variant X1, mRNA [XM_017598389]
A_64_P088695	0.0067209895	down	2.172552	-2.172552	-1.1193907	Tmtc4	Rattus norvegicus transmembrane and tetratricopeptide repeat containing 4 (Tmtc4), mRNA [NM_001134414]
A_44_P313815	0.008012362	down	2.1725326	-2.1725326	-1.1193777	Tesk2	Rattus norvegicus testis-specific kinase 2 (Tesk2), mRNA [NM_133396]
A_44_P945950	0.032160535	down	2.1714246	-2.1714246	-1.1186419	Plxna2	plexin A2 [Source:RGD Symbol;Acc:1305325] [ENSRNOT00000009900]
A_64_P099633	0.013195484	up	2.1703417	2.1703417	1.1179222	Lcn10	Rattus norvegicus lipocalin 10 (Lcn10), mRNA [NM_001128137]
A_44_P1154706	0.012955635	up	2.1700895	2.1700895	1.1177545
A_44_P380038	0.028074676	up	2.1686041	2.1686041	1.1167667	Heatr3	HEAT repeat containing 3 [Source:RGD Symbol;Acc:1308267] [ENSRNOT00000020793]
A_44_P143886	0.009857329	down	2.1679516	-2.1679516	-1.1163325	Insig1	Rattus norvegicus insulin induced gene 1 (Insig1), mRNA [NM_022392]
A_44_P1083837	0.008935724	up	2.1679235	2.1679235	1.1163138	Adgrg5	Rattus norvegicus adhesion G protein-coupled receptor G5 (Adgrg5), mRNA [NM_001107410]
A_42_P508471	0.0184242	down	2.1678905	-2.1678905	-1.1162919	Rgn	Rattus norvegicus regucalcin (Rgn), mRNA [NM_031546]
A_44_P636387	0.016401628	up	2.1670582	2.1670582	1.1157379
A_64_P071131	0.024481272	up	2.1661851	2.1661851	1.1151565	Otud6a	OTU deubiquitinase 6A [Source:RGD Symbol;Acc:1560855] [ENSRNOT00000029298]
A_44_P1151884	0.011344918	down	2.1661158	-2.1661158	-1.1151103	Cystm1	PREDICTED: Rattus norvegicus cysteine-rich transmembrane module containing 1 (Cystm1), transcript variant X2, mRNA [XM_006222544]
A_44_P1137518	0.004768397	up	2.1660328	2.1660328	1.1150551	LOC103694026	PREDICTED: Rattus norvegicus uncharacterized LOC103694026 (LOC103694026), ncRNA [XR_596589]
A_44_P250368	0.015361282	down	2.1654096	-2.1654096	-1.1146399	Tk1	Rattus norvegicus thymidine kinase 1 (Tk1), mRNA [NM_052800]
A_44_P1134425	0.010775475	up	2.1647751	2.1647751	1.1142172
A_64_P094050	0.006905181	up	2.1644924	2.1644924	1.1140287	Irx5	Rattus norvegicus iroquois homeobox 5 (Irx5), mRNA [NM_001030044]
A_44_P1082469	0.0051526646	up	2.164304	2.164304	1.1139032	Oas3	Rattus norvegicus 2'-5'-oligoadenylate synthetase 3 (Oas3), mRNA [NM_001009493]
A_44_P958966	0.012993682	down	2.163436	-2.163436	-1.1133244
A_42_P498659	0.025715131	down	2.1629376	-2.1629376	-1.112992		UI-R-C0-id-f-05-0-UI.r1 UI-R-C0 Rattus norvegicus cDNA clone UI-R-C0-id-f-05-0-UI 5', mRNA sequence [BF557435]
A_44_P1087053	0.044817507	up	2.1626067	2.1626067	1.1127713	Utp15	Rattus norvegicus UTP15, small subunit processome component (Utp15), mRNA [NM_001107647]
A_44_P1107838	0.0076168953	up	2.1611886	2.1611886	1.111825	Tubgcp6	Rattus norvegicus tubulin, gamma complex associated protein 6 (Tubgcp6), mRNA [NM_001108748]
A_64_P074267	0.038331885	up	2.1601243	2.1601243	1.1111143	Pnrc1	Rattus norvegicus proline-rich nuclear receptor coactivator 1 (Pnrc1), mRNA [NM_173322]
A_44_P1112183	0.0146115	up	2.160051	2.160051	1.1110654	Hnrnpu	PREDICTED: Rattus norvegicus heterogeneous nuclear ribonucleoprotein U (Hnrnpu), transcript variant X1, mRNA [XM_006250311]
A_64_P107742	0.0053014294	down	2.1584442	-2.1584442	-1.1099918	Plgrkt	Rattus norvegicus plasminogen receptor with a C-terminal lysine (Plgrkt), mRNA [NM_001106347]
A_44_P1131919	0.012951709	up	2.1575327	2.1575327	1.1093824	Scpep1	PREDICTED: Rattus norvegicus serine carboxypeptidase 1 (Scpep1), transcript variant X1, mRNA [XM_017596951]
A_64_P136362	0.015196933	up	2.156525	2.156525	1.1087084	Iba57	Rattus norvegicus IBA57 homolog, iron-sulfur cluster assembly (Iba57), mRNA [NM_001108827]
A_42_P528844	0.03971098	down	2.1564658	-2.1564658	-1.1086688	Acsl5	Rattus norvegicus acyl-CoA synthetase long-chain family member 5 (Acsl5), mRNA [NM_053607]
A_64_P150246	0.010112401	up	2.1563928	2.1563928	1.10862	Mapkapk3	Rattus norvegicus mitogen-activated protein kinase-activated protein kinase 3 (Mapkapk3), mRNA [NM_001012127]
A_44_P1095313	0.014428718	down	2.1558979	-2.1558979	-1.1082888	Pkhd1	PREDICTED: Rattus norvegicus polycystic kidney and hepatic disease 1 (Pkhd1), transcript variant X2, mRNA [XM_008757980]
A_44_P1128645	0.012048351	down	2.1557965	-2.1557965	-1.108221
A_64_P015612	0.04283852	up	2.1543386	2.1543386	1.107245	Slc12a3	Rattus norvegicus solute carrier family 12 (sodium/chloride transporters), member 3 (Slc12a3), mRNA [NM_019345]
A_44_P1081244	0.035654925	down	2.1540911	-2.1540911	-1.1070793	Tlr6	Rattus norvegicus toll-like receptor 6 (Tlr6), mRNA [NM_207604]
A_44_P1121110	0.04303577	up	2.1536386	2.1536386	1.1067761
A_43_P20544	0.016917009	up	2.1526594	2.1526594	1.1061201	Ephb3	Rattus norvegicus Eph receptor B3 (Ephb3), mRNA [NM_001105868]
A_44_P808443	0.0042793886	down	2.1522667	-2.1522667	-1.1058569	Proser2	PREDICTED: Rattus norvegicus proline and serine rich 2 (Proser2), transcript variant X3, mRNA [XM_006222460]
A_43_P11785	0.027379774	up	2.1520655	2.1520655	1.105722	Pde4d	Rattus norvegicus phosphodiesterase 4D (Pde4d), transcript variant 5, mRNA [NM_017032]
A_44_P212470	0.0046073487	down	2.1519325	-2.1519325	-1.1056328	Fam92a	family with sequence similarity 92 member A [Source:RGD Symbol;Acc:1310681] [ENSRNOT00000022249]
A_44_P578061	0.010604615	down	2.1515837	-2.1515837	-1.1053989	Mab21l3	Rattus norvegicus mab-21 like 3 (Mab21l3), mRNA [NM_001106456]
A_64_P014427	0.007984925	up	2.1510046	2.1510046	1.1050105	Pla2g15	Rattus norvegicus phospholipase A2, group XV (Pla2g15), mRNA [NM_001004277]
A_64_P052670	0.0042984183	up	2.1499567	2.1499567	1.1043075	Gsn	Rattus norvegicus gelsolin (Gsn), mRNA [NM_001004080]
A_64_P163658	0.007137981	down	2.1492205	-2.1492205	-1.1038134	Sertad3	Rattus norvegicus SERTA domain containing 3 (Sertad3), mRNA [NM_001017513]
A_44_P1143915	0.035021506	up	2.1470609	2.1470609	1.1023631	LOC103691768	PREDICTED: Rattus norvegicus uncharacterized LOC103691768 (LOC103691768), transcript variant X1, ncRNA [XR_591464]
A_64_P027782	0.0051630563	up	2.1466982	2.1466982	1.1021194
A_44_P1134430	0.018566802	up	2.146292	2.146292	1.1018463	LOC102549740	PREDICTED: Rattus norvegicus uncharacterized LOC102549740 (LOC102549740), ncRNA [XR_592482]
A_44_P250520	0.004912176	down	2.1462495	-2.1462495	-1.1018178	Rexo5	Rattus norvegicus exonuclease NEF-sp (Exnef), mRNA [NM_001079706]
A_44_P1095659	0.005034004	down	2.145098	-2.145098	-1.1010436	LOC102555635	zinc finger protein 39-like [Source:RGD Symbol;Acc:7511312] [ENSRNOT00000061005]
A_44_P1163397	0.012269918	up	2.144498	2.144498	1.10064
A_44_P1370838	0.006225494	up	2.1442647	2.1442647	1.100483	Bnip3	Rattus norvegicus BCL2 interacting protein 3 (Bnip3), mRNA [NM_053420]
A_44_P971455	0.011967063	down	2.1423988	-2.1423988	-1.0992271	NEWGENE_1305243	PREDICTED: Rattus norvegicus ring finger and WD repeat domain 3 (NEWGENE_1305243), transcript variant X2, mRNA [XM_001075875]
A_64_P041996	0.010068752	up	2.142283	2.142283	1.099149	Stac	PREDICTED: Rattus norvegicus SH3 and cysteine rich domain (Stac), transcript variant X1, mRNA [XM_001076458]
A_44_P1152848	0.0060171187	down	2.1419902	-2.1419902	-1.0989518	Zdhhc2	PREDICTED: Rattus norvegicus zinc finger, DHHC-type containing 2 (Zdhhc2), transcript variant X1, mRNA [XM_008771288]
A_44_P1361141	0.041195866	down	2.1409755	-2.1409755	-1.0982683
A_44_P1116037	0.024560612	up	2.1404173	2.1404173	1.097892		family with sequence similarity 120C [Source:RGD Symbol;Acc:1564253] [ENSRNOT00000093170]
A_44_P1110089	0.040662017	down	2.1401453	-2.1401453	-1.0977087	Vmp1	PREDICTED: Rattus norvegicus vacuole membrane protein 1 (Vmp1), transcript variant X2, mRNA [XM_006247079]
A_64_P058923	0.022457188	down	2.139988	-2.139988	-1.0976026	Tes	Rattus norvegicus testin LIM domain protein (Tes), mRNA [NM_001039344]
A_43_P10378	0.0144517375	down	2.1392128	-2.1392128	-1.09708	Pdk1	PREDICTED: Rattus norvegicus pyruvate dehydrogenase kinase 1 (Pdk1), transcript variant X1, mRNA [XM_006234352]
A_43_P19259	0.010909596	down	2.1380439	-2.1380439	-1.0962914	Igf2bp3	insulin-like growth factor 2 mRNA binding protein 3 [Source:RGD Symbol;Acc:1306512] [ENSRNOT00000084543]
A_42_P689757	0.008586915	up	2.137762	2.137762	1.0961013	Nr6a1	PREDICTED: Rattus norvegicus nuclear receptor subfamily 6, group A, member 1 (Nr6a1), transcript variant X4, mRNA [XM_006224403]
A_64_P111786	0.024157643	up	2.137575	2.137575	1.0959749	Sqor	Rattus norvegicus sulfide quinone reductase-like (yeast) (Sqrdl), mRNA [NM_001047913]
A_44_P356027	0.0062019313	down	2.1374753	-2.1374753	-1.0959077	Sc5d	Rattus norvegicus sterol-C5-desaturase (Sc5d), mRNA [NM_053642]
A_44_P316611	0.022210198	up	2.137273	2.137273	1.0957712	Pknox1	Rattus norvegicus PBX/knotted 1 homeobox 1 (Pknox1), mRNA [NM_001013074]
A_44_P1105622	0.0050137937	down	2.136843	-2.136843	-1.0954809	Fancg	PREDICTED: Rattus norvegicus Fanconi anemia, complementation group G (Fancg), transcript variant X1, mRNA [XM_017593721]
A_44_P1147393	0.007314149	up	2.1361701	2.1361701	1.0950265	LOC102550737	PREDICTED: Rattus norvegicus uncharacterized LOC102550737 (LOC102550737), transcript variant X1, ncRNA [XR_357044]
A_42_P636963	0.008360651	down	2.136086	-2.136086	-1.0949697	Zfp46	Rattus norvegicus zinc finger protein 46 (Zfp46), mRNA [NM_001106691]
A_44_P1150885	0.025052005	up	2.134955	2.134955	1.0942056	LOC103690113	PREDICTED: Rattus norvegicus uncharacterized LOC103690113 (LOC103690113), ncRNA [XR_597379]
A_44_P1122963	0.004425552	up	2.1338155	2.1338155	1.0934354	LOC102552303	PREDICTED: Rattus norvegicus uncharacterized LOC102552303 (LOC102552303), transcript variant X1, ncRNA [XR_345396]
A_44_P1103460	0.00626291	down	2.1327665	-2.1327665	-1.092726	Orc4	PREDICTED: Rattus norvegicus origin recognition complex, subunit 4 (Orc4), transcript variant X6, mRNA [XM_006234152]
A_42_P667960	0.028840063	down	2.1326456	-2.1326456	-1.0926442	Ikbke	Rattus norvegicus inhibitor of nuclear factor kappa B kinase subunit epsilon (Ikbke), mRNA [NM_001108854]
A_44_P993051	0.024778288	up	2.131819	2.131819	1.092085	Bpifa1	Rattus norvegicus BPI fold containing family A, member 1 (Bpifa1), mRNA [NM_172031]
A_44_P1086868	0.017909493	down	2.1311219	-2.1311219	-1.091613	Zfp763	Rattus norvegicus zinc finger protein 763 (Zfp763), mRNA [NM_001108063]
A_64_P017766	0.009803848	up	2.1301777	2.1301777	1.0909739	Scml4	Rattus norvegicus sex comb on midleg-like 4 (Drosophila) (Scml4), mRNA [NM_001107638]
A_44_P1082019	0.010444832	up	2.1297274	2.1297274	1.0906688	Mobp	Rattus norvegicus myelin-associated oligodendrocyte basic protein (Mobp), mRNA [NM_012720]
A_64_P139689	0.043507766	down	2.1295896	-2.1295896	-1.0905753
A_44_P1081042	0.028952854	up	2.1294003	2.1294003	1.0904472	Ces2	Rattus norvegicus carboxylesterase 2 (Ces2), mRNA [NM_001271303]
A_42_P823322	0.008424301	down	2.128941	-2.128941	-1.090136	Slc23a1	Rattus norvegicus solute carrier family 23 member 1 (Slc23a1), mRNA [NM_017315]
A_42_P649891	0.0044642435	down	2.1285918	-2.1285918	-1.0898993
A_44_P191784	0.03613651	down	2.1277509	-2.1277509	-1.0893292	Calm1	Rattus norvegicus calmodulin 1 (Calm1), mRNA [NM_031969]
A_64_P097340	0.007273694	down	2.1276464	-2.1276464	-1.0892584	Zfp867	Rattus norvegicus zinc finger protein 867 (Zfp867), mRNA [NM_001109677]
A_42_P709423	0.040076893	up	2.1266646	2.1266646	1.0885925	Mlph	Rattus norvegicus melanophilin (Mlph), mRNA [NM_001012135]
A_44_P1365499	0.007711315	down	2.1236773	-2.1236773	-1.0865645	Klb	PREDICTED: Rattus norvegicus klotho beta (Klb), transcript variant X2, mRNA [XM_008765414]
A_44_P1103490	0.024304254	down	2.1234927	-2.1234927	-1.0864391	RGD1564854	Rattus norvegicus similar to divalent cation tolerant protein CUTA (RGD1564854), mRNA [NM_001109341]
A_44_P1140651	0.01470231	up	2.1231873	2.1231873	1.0862316	LOC102551133	PREDICTED: Rattus norvegicus uncharacterized LOC102551133 (LOC102551133), transcript variant X1, ncRNA [XR_589652]
A_43_P11831	0.012952284	down	2.1223655	-2.1223655	-1.0856731	Ak4	Rattus norvegicus adenylate kinase 4 (Ak4), mRNA [NM_017135]
A_44_P1360379	0.009504571	up	2.1221063	2.1221063	1.0854969	Simc1	SUMO-interacting motifs containing 1 [Source:RGD Symbol;Acc:2319689] [ENSRNOT00000064274]
A_42_P736812	0.0050212415	down	2.121865	-2.121865	-1.0853329	Cavin3	Rattus norvegicus protein kinase C, delta binding protein (Prkcdbp), mRNA [NM_134449]
A_44_P523372	0.013725854	up	2.1203868	2.1203868	1.0843275	Nedd9	Rattus norvegicus neural precursor cell expressed, developmentally down-regulated 9 (Nedd9), mRNA [NM_001011922]
A_64_P035694	0.025502069	down	2.1182108	-2.1182108	-1.0828462	Rhou	PREDICTED: Rattus norvegicus ras homolog family member U (Rhou), transcript variant X1, mRNA [XM_008772678]
A_42_P687819	0.009208888	up	2.117501	2.117501	1.0823627	Atoh8	Rattus norvegicus atonal bHLH transcription factor 8 (Atoh8), mRNA [NM_001109241]
A_44_P287911	0.00998326	down	2.1160207	-2.1160207	-1.0813537	Afdn	Rattus norvegicus afadin, adherens junction formation factor (Afdn), mRNA [NM_013217]
A_43_P10499	0.03539872	down	2.1152363	-2.1152363	-1.0808188	LOC102553634	PREDICTED: Rattus norvegicus uncharacterized LOC102553634 (LOC102553634), ncRNA [XR_001840492]
A_44_P777424	0.005508461	up	2.1149552	2.1149552	1.0806271	LOC100362783	Rattus norvegicus Uncharacterized protein C7orf61 homolog (LOC100362783), mRNA [NM_001271236]
A_44_P1148276	0.017586468	down	2.1141489	-2.1141489	-1.0800769
A_64_P149735	0.03290036	up	2.1136217	2.1136217	1.0797172	Sqstm1	Rattus norvegicus sequestosome 1 (Sqstm1), transcript variant 2, mRNA [NM_181550]
A_43_P15719	0.0055597625	down	2.1125782	-2.1125782	-1.0790046	Hsp90b1	Rattus norvegicus heat shock protein 90 beta family member 1 (Hsp90b1), mRNA [NM_001012197]
A_44_P1131824	0.0054771435	up	2.1112359	2.1112359	1.0780877	LOC102550168	PREDICTED: Rattus norvegicus uncharacterized LOC102550168 (LOC102550168), ncRNA [XR_338741]
A_44_P174374	0.007846574	down	2.1090767	-2.1090767	-1.0766115	Ephx1	Rattus norvegicus epoxide hydrolase 1 (Ephx1), transcript variant 2, mRNA [NM_012844]
A_42_P689905	0.0065931426	up	2.106591	2.106591	1.0749102	Apoc2	Rattus norvegicus apolipoprotein C2 (Apoc2), mRNA [NM_001085352]
A_44_P448674	0.0091438405	up	2.1057112	2.1057112	1.0743076		EST215090 Normalized rat kidney, Bento Soares Rattus sp. cDNA clone RKIBP36 3' end, mRNA sequence [AI169255]
A_64_P031620	0.039619017	up	2.1043255	2.1043255	1.0733579	H1foo	Rattus norvegicus H1 histone family, member O, oocyte-specific (H1foo), mRNA [NM_001109351]
A_44_P854908	0.021704355	down	2.1039524	-2.1039524	-1.073102		AMGNNUC:NRHY5-00351-C1-A W Rat hypothalamus (10471) Rattus norvegicus cDNA clone nrhy5-00351-c1 5', mRNA sequence [CB583330]
A_44_P1083312	0.0060551427	up	2.1027524	2.1027524	1.072279	Ggn	Rattus norvegicus gametogenetin (Ggn), transcript variant 1, mRNA [NM_001013065]
A_43_P12236	0.03848999	up	2.1026711	2.1026711	1.0722232	Oat	Rattus norvegicus ornithine aminotransferase (Oat), mRNA [NM_022521]
A_44_P1123381	0.03743091	up	2.102241	2.102241	1.071928	LOC102555922	PREDICTED: Rattus norvegicus uncharacterized LOC102555922 (LOC102555922), ncRNA [XR_345613]
A_64_P079220	0.037475586	down	2.101608	-2.101608	-1.0714936	Gprin3	GPRIN family member 3 [Source:RGD Symbol;Acc:1565690] [ENSRNOT00000039316]
A_44_P250983	0.012104258	up	2.1015837	2.1015837	1.0714769	Nrbp2	Rattus norvegicus nuclear receptor binding protein 2 (Nrbp2), mRNA [NM_001135007]
A_64_P091088	0.018669236	up	2.1009746	2.1009746	1.0710586	Fmo2	Rattus norvegicus flavin containing monooxygenase 2 (Fmo2), mRNA [NM_144737]
A_42_P820023	0.02350891	up	2.100314	2.100314	1.0706049	Pfkfb2	Rattus norvegicus 6-phosphofructo-2-kinase/fructose-2,6-biphosphatase 2 (Pfkfb2), transcript variant 3, mRNA [NM_080477]
A_44_P758613	0.006993249	up	2.100091	2.100091	1.0704519		EST201913 Normalized rat lung, Bento Soares Rattus sp. cDNA clone RLUBH85 3' end, mRNA sequence [AA946414]
A_44_P1365121	0.012259184	up	2.0995746	2.0995746	1.070097
A_44_P1099105	0.007313774	up	2.0994132	2.0994132	1.0699861	RGD1564177	PREDICTED: Rattus norvegicus RGD1564177 (RGD1564177), transcript variant X1, mRNA [XM_008758480]
A_44_P1092736	0.009454818	up	2.0982738	2.0982738	1.0692029
A_42_P505188	0.021973621	down	2.097635	-2.097635	-1.0687636	Pym1	Rattus norvegicus PYM homolog 1, exon junction complex associated factor (Pym1), mRNA [NM_001108986]
A_64_P166218	0.0065745413	up	2.0974042	2.0974042	1.068605	Bfar	Rattus norvegicus bifunctional apoptosis regulator (Bfar), transcript variant 2, non-coding RNA [NR_138253]
A_42_P487567	0.005857961	up	2.0964243	2.0964243	1.0679307	Dsp	desmoplakin [Source:RGD Symbol;Acc:1305794] [ENSRNOT00000018649]
A_44_P632635	0.047025286	down	2.095248	-2.095248	-1.067121		UI-R-CA1-bbq-h-04-0-UI.s1 UI-R-CA1 Rattus norvegicus cDNA clone UI-R-CA1-bbq-h-04-0-UI 3', mRNA sequence [BF387213]
A_44_P864923	0.018988512	up	2.0944328	2.0944328	1.0665596		AW916836 EST348049 Rat gene index, normalized rat, norvegicus, Bento Soares Rattus norvegicus cDNA clone RGIDU28 5' end, mRNA sequence [AW916836]
A_44_P1113596	0.010470045	down	2.0941222	-2.0941222	-1.0663456
A_44_P1153427	0.007579814	down	2.093759	-2.093759	-1.0660955		RAD50 interactor 1 [Source:RGD Symbol;Acc:1560433] [ENSRNOT00000035034]
A_44_P357835	0.01726719	down	2.0931826	-2.0931826	-1.0656981		BF282088 EST446679 Rat Gene Index, normalized rat, Rattus norvegicus cDNA Rattus norvegicus cDNA clone RGIDB58 3' sequence, mRNA sequence [BF282088]
A_44_P1084929	0.021654604	down	2.0931356	-2.0931356	-1.0656657	Sesn3	Rattus norvegicus sestrin 3 (Sesn3), mRNA [NM_001108125]
A_44_P1130302	0.0093207285	down	2.0916271	-2.0916271	-1.0646256
A_43_P17475	0.044984367	down	2.090996	-2.090996	-1.0641903	Edem1	Rattus norvegicus ER degradation enhancing alpha-mannosidase like protein 1 (Edem1), mRNA [NM_001305279]
A_44_P550748	0.008939801	down	2.0902348	-2.0902348	-1.0636649	Lrat	Rattus norvegicus lecithin-retinol acyltransferase (phosphatidylcholine-retinol-O-acyltransferase) (Lrat), mRNA [NM_022280]
A_64_P032991	0.022292757	down	2.0899956	-2.0899956	-1.0634999	Zfp446	PREDICTED: Rattus norvegicus zinc finger protein 446 (Zfp446), transcript variant X4, mRNA [XM_008774388]
A_64_P124364	0.009718448	up	2.0898876	2.0898876	1.0634253	LOC691113	hypothetical protein LOC691113 [Source:RGD Symbol;Acc:1587471] [ENSRNOT00000015807]
A_44_P219926	0.03355702	up	2.0898278	2.0898278	1.063384	Zbtb10	Rattus norvegicus zinc finger and BTB domain containing 10 (Zbtb10), mRNA [NM_024489]
A_42_P684538	0.004953661	up	2.0895426	2.0895426	1.0631871	Slc2a1	Rattus norvegicus solute carrier family 2 member 1 (Slc2a1), mRNA [NM_138827]
A_44_P1143758	0.011475195	down	2.0892463	-2.0892463	-1.0629826	LOC102556299	PREDICTED: Rattus norvegicus uncharacterized LOC102556299 (LOC102556299), transcript variant X1, ncRNA [XR_591368]
A_42_P515876	0.014041278	down	2.0887167	-2.0887167	-1.0626168	Rnpep	Rattus norvegicus arginyl aminopeptidase (Rnpep), mRNA [NM_031097]
A_44_P1145012	0.019114217	up	2.0883806	2.0883806	1.0623846	LOC102556373	PREDICTED: Rattus norvegicus uncharacterized LOC102556373 (LOC102556373), transcript variant X2, ncRNA [XR_001843636]
A_64_P026291	0.007940757	down	2.088305	-2.088305	-1.0623324	Ap3m2	Rattus norvegicus adaptor-related protein complex 3, mu 2 subunit (Ap3m2), mRNA [NM_133305]
A_44_P1087636	0.022533292	up	2.0882752	2.0882752	1.0623119	Bicral	Rattus norvegicus GLTSCR1-like (Gltscr1l), mRNA [NM_001106888]
A_44_P1136696	0.04533013	up	2.088102	2.088102	1.0621922
A_44_P1095253	0.006504489	up	2.0878375	2.0878375	1.0620093	Sh2d3a	PREDICTED: Rattus norvegicus hypothetical LOC100360476 (LOC100360476), transcript variant X2, mRNA [XM_008757944]
A_44_P1151712	0.015713206	up	2.0876887	2.0876887	1.0619066	Eva1c	eva-1 homolog C [Source:RGD Symbol;Acc:1307569] [ENSRNOT00000002838]
A_44_P1110393	0.013733613	up	2.0872853	2.0872853	1.0616277	Acbd4	PREDICTED: Rattus norvegicus acyl-CoA binding domain containing 4 (Acbd4), transcript variant X7, mRNA [XM_006247509]
A_64_P145043	0.006113111	up	2.0868647	2.0868647	1.0613371	Dmrtc2	Rattus norvegicus DMRT-like family C2 (Dmrtc2), mRNA [NM_001109140]
A_44_P1084699	0.03911023	up	2.086286	2.086286	1.0609369	Majin	Rattus norvegicus membrane anchored junction protein (Majin), mRNA [NM_001024291]
A_44_P1105877	0.012282919	down	2.0856607	-2.0856607	-1.0605044	Dock7	Rattus norvegicus dedicator of cytokinesis 7 (Dock7), mRNA [NM_001191574]
A_44_P853647	0.02754511	up	2.084142	2.084142	1.0594535	Wasf1	Rattus norvegicus WAS protein family, member 1 (Wasf1), mRNA [NM_001025114]
A_44_P1108240	0.020921294	up	2.0840633	2.0840633	1.0593991	Dapk2	PREDICTED: Rattus norvegicus death-associated protein kinase 2 (Dapk2), transcript variant X1, mRNA [XM_008766241]
A_43_P18931	0.011456753	down	2.0837333	-2.0837333	-1.0591706	Tp53i3	Rattus norvegicus tumor protein p53 inducible protein 3 (Tp53i3), mRNA [NM_001113775]
A_44_P953481	0.0074732983	up	2.0818326	2.0818326	1.057854		UI-R-C2p-oi-g-07-0-UI.s1 UI-R-C2p Rattus norvegicus cDNA clone UI-R-C2p-oi-g-07-0-UI 3', mRNA sequence [AI138049]
A_44_P1108915	0.030927595	up	2.081379	2.081379	1.0575396	Usp49	PREDICTED: Rattus norvegicus ubiquitin specific peptidase 49 (Usp49), transcript variant X2, mRNA [XM_017596411]
A_44_P336489	0.011633035	up	2.081064	2.081064	1.0573213	Tmx4	Rattus norvegicus thioredoxin-related transmembrane protein 4 (Tmx4), mRNA [NM_001100529]
A_44_P450460	0.04960999	down	2.079243	-2.079243	-1.0560583	Wdyhv1	Rattus norvegicus WDYHV motif containing 1 (Wdyhv1), mRNA [NM_001025024]
A_44_P344816	0.0053247875	up	2.077148	2.077148	1.0546039	Smox	Rattus norvegicus spermine oxidase (Smox), mRNA [NM_001134854]
A_44_P1082214	0.009409744	up	2.076715	2.076715	1.0543032	Hadha	Rattus norvegicus hydroxyacyl-CoA dehydrogenase/3-ketoacyl-CoA thiolase/enoyl-CoA hydratase (trifunctional protein), alpha subunit (Hadha), mRNA [NM_130826]
A_44_P1160368	0.018096413	down	2.0764248	-2.0764248	-1.0541016	C3ar1	complement C3a receptor 1 [Source:RGD Symbol;Acc:620537] [ENSRNOT00000012216]
A_44_P1101829	0.042985234	down	2.0756085	-2.0756085	-1.0535344	Cep78	PREDICTED: Rattus norvegicus centrosomal protein 78 (Cep78), transcript variant X1, mRNA [XM_006231136]
A_44_P1085542	0.00863605	down	2.0755944	-2.0755944	-1.0535245	Pgm3	Rattus norvegicus phosphoglucomutase 3 (Pgm3), mRNA [NM_001108772]
A_64_P148906	0.01882171	up	2.0755587	2.0755587	1.0534997	Aspg	Rattus norvegicus asparaginase (Aspg), mRNA [NM_144750]
A_44_P467942	0.01206642	down	2.0752575	-2.0752575	-1.0532904	Copg1	Rattus norvegicus coatomer protein complex, subunit gamma 1 (Copg1), mRNA [NM_001031822]
A_44_P1128670	0.008069765	up	2.0752132	2.0752132	1.0532595	LOC102549885	PREDICTED: Rattus norvegicus uncharacterized LOC102549885 (LOC102549885), ncRNA [XR_348134]
A_44_P1096736	0.012462213	up	2.075102	2.075102	1.0531822	LOC102556672	PREDICTED: Rattus norvegicus igE-binding protein-like (LOC102556672), transcript variant X2, partial mRNA [XM_006221437]
A_44_P1091665	0.025692886	down	2.0749798	-2.0749798	-1.0530972	Nt5c2	PREDICTED: Rattus norvegicus 5'-nucleotidase, cytosolic II (Nt5c2), transcript variant X5, mRNA [XM_017589894]
A_44_P1138593	0.015574431	down	2.0746856	-2.0746856	-1.0528927	LOC102546511	PREDICTED: Rattus norvegicus uncharacterized LOC102546511 (LOC102546511), ncRNA [XR_341849]
A_44_P1046205	0.03265509	up	2.0746708	2.0746708	1.0528824	Kdm4c	Rattus norvegicus lysine demethylase 4C (Kdm4c), mRNA [NM_001106663]
A_64_P026479	0.018092733	down	2.0724356	-2.0724356	-1.0513272
A_44_P270464	0.0056942585	up	2.0718942	2.0718942	1.0509503		UI-R-DZ0-cmx-o-02-0-UI.s1 UI-R-DZ0 Rattus norvegicus cDNA clone UI-R-DZ0-cmx-o-02-0-UI 3', mRNA sequence [BQ190760]
A_42_P707818	0.036253918	up	2.0711145	2.0711145	1.0504073	Tmcc2	Rattus norvegicus transmembrane and coiled-coil domain family 2 (Tmcc2), mRNA [NM_001305128]
A_44_P210892	0.045334496	down	2.0710359	-2.0710359	-1.0503526	Nanp	Rattus norvegicus N-acetylneuraminic acid phosphatase (Nanp), mRNA [NM_001009409]
A_44_P869091	0.009223455	up	2.0709107	2.0709107	1.0502653		zinc finger protein 874b [Source:RGD Symbol;Acc:1594209] [ENSRNOT00000077781]
A_44_P184497	0.023626486	down	2.070244	-2.070244	-1.0498009	Cyb5b	Rattus norvegicus cytochrome b5 type B (Cyb5b), mRNA [NM_030586]
A_44_P538334	0.008704221	up	2.0698822	2.0698822	1.0495486	Impa2	Rattus norvegicus inositol monophosphatase 2 (Impa2), mRNA [NM_172224]
A_44_P1111840	0.029608328	down	2.069862	-2.069862	-1.0495344	LOC288978	Rattus norvegicus hypothetical LOC288978 (LOC288978), mRNA [NM_001134500]
A_44_P191287	0.015138197	up	2.067716	2.067716	1.048038	Nrbp2	PREDICTED: Rattus norvegicus nuclear receptor binding protein 2 (Nrbp2), transcript variant X1, mRNA [XM_006241885]
A_44_P851720	0.013356072	down	2.0675762	-2.0675762	-1.0479405	Usp2	PREDICTED: Rattus norvegicus ubiquitin specific peptidase 2 (Usp2), transcript variant X1, mRNA [XM_006242861]
A_43_P12519	0.016189124	down	2.0674734	-2.0674734	-1.0478687	S100a10	Rattus norvegicus S100 calcium binding protein A10 (S100a10), mRNA [NM_031114]
A_44_P242969	0.03485756	down	2.0673673	-2.0673673	-1.0477947	Gpam	Rattus norvegicus glycerol-3-phosphate acyltransferase, mitochondrial (Gpam), mRNA [NM_017274]
A_44_P1091161	0.028316567	up	2.0672078	2.0672078	1.0476834	LOC103695017	PREDICTED: Rattus norvegicus cell wall integrity and stress response component 4-like (LOC103695017), mRNA [XM_017587543]
A_44_P1105453	0.019307576	down	2.0671728	-2.0671728	-1.0476589	Tp53inp1	PREDICTED: Rattus norvegicus tumor protein p53 inducible nuclear protein 1 (Tp53inp1), transcript variant X2, mRNA [XM_006237868]
A_44_P618177	0.0075511476	up	2.0664837	2.0664837	1.047178	Lrrc58	Q3DZ59_CHLAU (Q3DZ59) Regulatory protein, LysR:LysR, substrate-binding, partial (7%) [TC616957]
A_44_P1148482	0.018623004	up	2.0652947	2.0652947	1.0463476
A_64_P074436	0.0060918075	up	2.0645156	2.0645156	1.0458033	Foxa1	Rattus norvegicus forkhead box A1 (Foxa1), mRNA [NM_012742]
A_44_P643604	0.008317744	up	2.0643623	2.0643623	1.0456961		UI-R-DY1-col-m-21-0-UI.s1 UI-R-DY1 Rattus norvegicus cDNA clone UI-R-DY1-col-m-21-0-UI 3', mRNA sequence [BQ211845]
A_43_P17902	0.034878533	up	2.0641546	2.0641546	1.0455511	LOC690082	PREDICTED: Rattus norvegicus similar to melanoma ubiquitous mutated protein (LOC690082), transcript variant X3, mRNA [XM_017588618]
A_44_P1156725	0.00758322	down	2.0634046	-2.0634046	-1.0450267	LOC102552988	uncharacterized LOC102552988 [Source:RGD Symbol;Acc:7517962] [ENSRNOT00000038955]
A_44_P1160773	0.049973983	down	2.0622065	-2.0622065	-1.0441887	Zfp53	Rattus norvegicus zinc finger protein 53 (Zfp53), mRNA [NM_001107468]
A_44_P1369762	0.043072425	up	2.0614781	2.0614781	1.0436791
A_44_P382152	0.009613492	up	2.0609918	2.0609918	1.0433388	LOC102548142	PREDICTED: Rattus norvegicus uncharacterized LOC102548142 (LOC102548142), transcript variant X1, ncRNA [XR_001836596]
A_64_P093599	0.008953987	down	2.0603347	-2.0603347	-1.0428787	Abcc4	Rattus norvegicus ATP binding cassette subfamily C member 4 (Abcc4), mRNA [NM_133411]
A_44_P491942	0.0072854212	down	2.0602798	-2.0602798	-1.0428402	Lrat	Rattus norvegicus lecithin-retinol acyltransferase (phosphatidylcholine-retinol-O-acyltransferase) (Lrat), mRNA [NM_022280]
A_44_P1122413	0.04803156	up	2.0597146	2.0597146	1.0424443	LOC102555660	PREDICTED: Rattus norvegicus uncharacterized LOC102555660 (LOC102555660), transcript variant X1, ncRNA [XR_591660]
A_44_P1109894	0.00941388	up	2.0591302	2.0591302	1.042035	Pfas	phosphoribosylformylglycinamidine synthase-like [Source:RGD Symbol;Acc:6485156] [ENSRNOT00000080769]
A_44_P1028549	0.0073163346	down	2.0588791	-2.0588791	-1.0418591	Casp4	Rattus norvegicus caspase 4 (Casp4), mRNA [NM_053736]
A_44_P1364864	0.010804341	down	2.0588346	-2.0588346	-1.0418279	Lingo4	Rattus norvegicus leucine rich repeat and Ig domain containing 4 (Lingo4), mRNA [NM_001109189]
A_64_P041223	0.009710151	down	2.0581744	-2.0581744	-1.0413651	Creb3l1	Rattus norvegicus cAMP responsive element binding protein 3-like 1 (Creb3l1), mRNA [NM_001005562]
A_64_P111714	0.011594311	down	2.0575247	-2.0575247	-1.0409098	Ostc	Rattus norvegicus oligosaccharyltransferase complex non-catalytic subunit (Ostc), mRNA [NM_001108566]
A_64_P000176	0.020540483	down	2.0566976	-2.0566976	-1.0403297	Dhcr24	Rattus norvegicus 24-dehydrocholesterol reductase (Dhcr24), mRNA [NM_001080148]
A_44_P1366231	0.022068178	down	2.0566616	-2.0566616	-1.0403044	Scube2	signal peptide, CUB domain and EGF like domain containing 2 [Source:RGD Symbol;Acc:1563998] [ENSRNOT00000052377]
A_44_P1085614	0.028411021	down	2.0564306	-2.0564306	-1.0401423	Asb5	Rattus norvegicus ankyrin repeat and SOCS box-containing 5 (Asb5), mRNA [NM_001044247]
A_44_P1153941	0.00872703	down	2.0544488	-2.0544488	-1.0387514	Arhgef9	Rattus norvegicus Cdc42 guanine nucleotide exchange factor 9 (Arhgef9), mRNA [NM_023957]
A_43_P12339	0.010125475	down	2.0533426	-2.0533426	-1.0379744	Chd8	Rattus norvegicus chromodomain helicase DNA binding protein 8 (Chd8), mRNA [NM_001347661]
A_44_P1163357	0.010259651	up	2.0532806	2.0532806	1.0379307	LOC102551062	PREDICTED: Rattus norvegicus uncharacterized LOC102551062 (LOC102551062), ncRNA [XR_357411]
A_44_P1091531	0.03560388	up	2.0529954	2.0529954	1.0377305	RGD1311595	PREDICTED: Rattus norvegicus similar to KIAA2026 protein (RGD1311595), transcript variant X1, mRNA [XM_001079649]
A_64_P117171	0.006004399	down	2.0527508	-2.0527508	-1.0375586	Ccdc167	Rattus norvegicus coiled-coil domain containing 167 (Ccdc167), mRNA [NM_001109548]
A_43_P21847	0.009945936	down	2.0523486	-2.0523486	-1.0372758	LOC103691238	zinc finger protein 239-like [Source:RGD Symbol;Acc:9074604] [ENSRNOT00000026979]
A_64_P077422	0.007475749	down	2.0511472	-2.0511472	-1.0364311	Zfp141	PREDICTED: Rattus norvegicus zinc finger protein 141 (Zfp141), mRNA [XM_006223226]
A_44_P1148139	0.008048939	up	2.051045	2.051045	1.0363591	LOC102552892	PREDICTED: Rattus norvegicus uncharacterized LOC102552892 (LOC102552892), ncRNA [XR_358284]
A_44_P218275	0.029698905	down	2.0503612	-2.0503612	-1.0358781	LOC103693421	PREDICTED: Rattus norvegicus uncharacterized LOC103693421 (LOC103693421), ncRNA [XR_594865]
A_44_P162489	0.013502002	up	2.0502472	2.0502472	1.0357978		EST451069 Rat Gene Index, normalized rat, Rattus norvegicus cDNA Rattus norvegicus cDNA clone RGIFQ38 5' sequence, mRNA sequence [BF286478]
A_44_P976336	0.0056021316	up	2.0501804	2.0501804	1.0357509	Atxn7	PREDICTED: Rattus norvegicus ataxin 7 (Atxn7), transcript variant X2, mRNA [XM_017599841]
A_64_P144423	0.006566996	up	2.049451	2.049451	1.0352376	Tulp4	Rattus norvegicus tubby like protein 4 (Tulp4), mRNA [NM_001109137]
A_64_P153870	0.022999156	down	2.0487497	-2.0487497	-1.0347437	Chid1	Rattus norvegicus chitinase domain containing 1 (Chid1), mRNA [NM_001047854]
A_44_P106883	0.020170078	up	2.0487342	2.0487342	1.0347328	Hnrnpu	PREDICTED: Rattus norvegicus heterogeneous nuclear ribonucleoprotein U (Hnrnpu), transcript variant X1, mRNA [XM_006250311]
A_44_P1102553	0.009309879	up	2.0485787	2.0485787	1.0346234	LOC102553014	PREDICTED: Rattus norvegicus uncharacterized LOC102553014 (LOC102553014), transcript variant X7, mRNA [XM_008760962]
A_43_P13967	0.0067221345	down	2.0485682	-2.0485682	-1.034616	Gsta2	Rattus norvegicus glutathione S-transferase alpha 2 (Gsta2), mRNA [NM_017013]
A_44_P1091196	0.010656806	up	2.0479093	2.0479093	1.0341518	LOC102552387	PREDICTED: Rattus norvegicus uncharacterized LOC102552387 (LOC102552387), transcript variant X10, mRNA [XM_008774567]
A_64_P019759	0.014896131	down	2.0465777	-2.0465777	-1.0332134
A_64_P161581	0.04653965	down	2.0464528	-2.0464528	-1.0331254	Myadm	Rattus norvegicus myeloid-associated differentiation marker (Myadm), mRNA [NM_183332]
A_44_P1126879	0.015475704	up	2.0462525	2.0462525	1.0329841	LOC103695298	PREDICTED: Rattus norvegicus uncharacterized LOC103695298 (LOC103695298), ncRNA [XR_001838441]
A_42_P824178	0.009301258	down	2.0457904	-2.0457904	-1.0326583	Slc25a1	Rattus norvegicus solute carrier family 25 member 1 (Slc25a1), mRNA [NM_017307]
A_44_P1082638	0.006927047	up	2.045662	2.045662	1.0325677	Ddr2	Rattus norvegicus discoidin domain receptor tyrosine kinase 2 (Ddr2), mRNA [NM_031764]
A_43_P20870	0.049848285	down	2.0453389	-2.0453389	-1.0323399	Ddx58	Rattus norvegicus DEXD/H-box helicase 58 (Ddx58), mRNA [NM_001106645]
A_44_P1158159	0.03755709	up	2.0445707	2.0445707	1.0317979		lemur tyrosine kinase 3 [Source:RGD Symbol;Acc:1588641] [ENSRNOT00000067679]
A_43_P18519	0.038091093	up	2.0442839	2.0442839	1.0315955	Spag6	Rattus norvegicus sperm associated antigen 6 (Spag6), mRNA [NM_001034960]
A_44_P1158377	0.028582655	up	2.0441835	2.0441835	1.0315247	Fam24a
A_44_P420343	0.02435923	down	2.0440216	-2.0440216	-1.0314105	Syde2	Rattus norvegicus synapse defective Rho GTPase homolog 2 (Syde2), mRNA [NM_001305229]
A_44_P1101888	0.04900947	up	2.0426977	2.0426977	1.0304757	Spata6l	PREDICTED: Rattus norvegicus spermatogenesis associated 6-like (Spata6l), transcript variant X1, mRNA [XM_008760342]
A_44_P1092896	0.036602218	up	2.0418754	2.0418754	1.0298948	LOC103691999	PREDICTED: Rattus norvegicus putative uncharacterized protein FLJ40606 (LOC103691999), mRNA [XM_008762609]
A_44_P1361256	0.03585653	down	2.0417073	-2.0417073	-1.029776	Ndufaf4	Rattus norvegicus NADH:ubiquinone oxidoreductase complex assembly factor 4 (Ndufaf4), mRNA [NM_198783]
A_64_P107003	0.032307833	up	2.041229	2.041229	1.029438	Mpp3	Rattus norvegicus membrane palmitoylated protein 3 (Mpp3), mRNA [NM_053668]
A_44_P139869	0.0059114587	up	2.0402806	2.0402806	1.0287676	Tmem176b	Rattus norvegicus transmembrane protein 176B (Tmem176b), transcript variant 1, mRNA [NM_134390]
A_42_P476785	0.018179907	up	2.0400534	2.0400534	1.0286069	Foxo3	HUMFESCD transmembrane protein {Homo sapiens} (exp=-1; wgp=0; cg=0), partial (15%) [TC596921]
A_44_P1366848	0.0079371985	down	2.039073	-2.039073	-1.0279135	Arhgap35	Rattus norvegicus Rho GTPase activating protein 35 (Arhgap35), mRNA [NM_001271132]
A_44_P295639	0.017787304	down	2.0385528	-2.0385528	-1.0275453	Gbe1	Rattus norvegicus 1,4-alpha-glucan branching enzyme 1 (Gbe1), mRNA [NM_001100502]
A_42_P738438	0.006501581	up	2.0373595	2.0373595	1.0267005	Hic2	Rattus norvegicus HIC ZBTB transcriptional repressor 2 (Hic2), mRNA [NM_001105862]
A_43_P22864	0.020804882	down	2.0372813	-2.0372813	-1.0266452	Rad54l	Rattus norvegicus RAD54 like (S. cerevisiae) (Rad54l), mRNA [NM_001134960]
A_44_P255997	0.012879256	down	2.0364122	-2.0364122	-1.0260296	LOC682357	PREDICTED: Rattus norvegicus similar to homolog of yeast ribosome biogenesis regulatory protein RRS1 (LOC682357), misc_RNA [XR_085748]
A_44_P427596	0.0067543387	down	2.036248	-2.036248	-1.0259132	Fabp1	Rattus norvegicus fatty acid binding protein 1 (Fabp1), mRNA [NM_012556]
A_64_P155193	0.012301762	down	2.0351882	-2.0351882	-1.0251622	Dio1	Rattus norvegicus deiodinase, iodothyronine, type I (Dio1), transcript variant 1, mRNA [NM_021653]
A_64_P112842	0.006501434	up	2.0350122	2.0350122	1.0250374	RGD1563217	Rattus norvegicus similar to RIKEN cDNA 4930451I11 (RGD1563217), mRNA [NM_001109155]
A_42_P685205	0.008454638	up	2.0348687	2.0348687	1.0249357	Gpr146	PREDICTED: Rattus norvegicus G protein-coupled receptor 146 (Gpr146), transcript variant X1, mRNA [XM_006248958]
A_44_P1155743	0.04831977	down	2.0347688	-2.0347688	-1.0248649	Il7
A_44_P1092056	0.006400447	up	2.0342948	2.0342948	1.0245287
A_44_P325189	0.01900998	down	2.0341597	-2.0341597	-1.0244329	Rcan2	Rattus norvegicus regulator of calcineurin 2 (Rcan2), mRNA [NM_175578]
A_44_P1150521	0.010476567	down	2.0332763	-2.0332763	-1.0238063	LOC102548978	PREDICTED: Rattus norvegicus uncharacterized LOC102548978 (LOC102548978), transcript variant X2, misc_RNA [XR_597143]
A_44_P1366124	0.034372088	down	2.0331306	-2.0331306	-1.0237029
A_44_P342966	0.006128797	down	2.033062	-2.033062	-1.0236542	Rwdd3	Rattus norvegicus RWD domain containing 3 (Rwdd3), mRNA [NM_001128152]
A_44_P1145623	0.032829538	up	2.0328128	2.0328128	1.0234773
A_44_P376556	0.019107178	up	2.0327573	2.0327573	1.023438	LOC102551062	PREDICTED: Rattus norvegicus uncharacterized LOC102551062 (LOC102551062), ncRNA [XR_357411]
A_44_P683862	0.009035495	up	2.032422	2.032422	1.0232	Blcap	Rattus norvegicus bladder cancer associated protein (Blcap), mRNA [NM_133582]
A_64_P143971	0.025781764	down	2.0317302	-2.0317302	-1.0227088	Pigh	Rattus norvegicus phosphatidylinositol glycan anchor biosynthesis, class H (Pigh), mRNA [NM_001108714]
A_44_P1137021	0.048896898	up	2.0314875	2.0314875	1.0225364	LOC103693962	PREDICTED: Rattus norvegicus uncharacterized LOC103693962 (LOC103693962), ncRNA [XR_596473]
A_44_P388801	0.03427333	down	2.0314753	-2.0314753	-1.0225278	Olr1583	Rattus norvegicus olfactory receptor 1583 (Olr1583), mRNA [NM_001000080]
A_44_P1082104	0.009047368	up	2.0309641	2.0309641	1.0221647	Cept1	Rattus norvegicus choline/ethanolamine phosphotransferase 1 (Cept1), mRNA [NM_001007699]
A_64_P104481	0.015054883	up	2.029692	2.029692	1.0212607	Spag7	Rattus norvegicus sperm associated antigen 7 (Spag7), mRNA [NM_001107016]
A_64_P282296	0.011580408	down	2.0295405	-2.0295405	-1.0211531	LOC108350662	PREDICTED: Rattus norvegicus disintegrin and metalloproteinase domain-containing protein 22-like (LOC108350662), transcript variant X1, mRNA [XM_017592952]
A_44_P290357	0.0063795187	down	2.0292056	-2.0292056	-1.020915	Eml2	Rattus norvegicus echinoderm microtubule associated protein like 2 (Eml2), mRNA [NM_138921]
A_44_P1153087	0.027234828	down	2.0290713	-2.0290713	-1.0208195	Mpv17l	MPV17 mitochondrial inner membrane protein like [Source:RGD Symbol;Acc:2324483] [ENSRNOT00000004384]
A_44_P297974	0.006019052	down	2.0286906	-2.0286906	-1.0205488	Fmnl1	Rattus norvegicus formin-like 1 (Fmnl1), mRNA [NM_001105846]
A_44_P583020	0.019863866	up	2.028636	2.028636	1.02051		EST352624 Rat gene index, normalized rat, norvegicus, Bento Soares Rattus norvegicus cDNA clone RGIHQ96 5' end, mRNA sequence [AW921320]
A_44_P1098485	0.020739522	down	2.0284011	-2.0284011	-1.020343	Chd9	PREDICTED: Rattus norvegicus chromodomain helicase DNA binding protein 9 (Chd9), transcript variant X1, mRNA [XM_017601469]
A_44_P715164	0.005784042	down	2.0279682	-2.0279682	-1.020035		AMGNNUC:NRHY5-00137-F10-A W Rat hypothalamus (10471) Rattus norvegicus cDNA clone nrhy5-00137-f10 5', mRNA sequence [CB557922]
A_44_P1120822	0.023192605	down	2.0267272	-2.0267272	-1.0191519	LOC103691640	PREDICTED: Rattus norvegicus uncharacterized LOC103691640 (LOC103691640), ncRNA [XR_591219]
A_44_P1155954	0.047327094	up	2.0263112	2.0263112	1.0188557
A_44_P1154801	0.012726663	up	2.026214	2.026214	1.0187864	Six6os1	Six6 opposite strand transcript 1 [Source:RGD Symbol;Acc:1559456] [ENSRNOT00000041409]
A_44_P1090021	0.01974002	up	2.0259295	2.0259295	1.0185839	Sh3bp4	Rattus norvegicus SH3-domain binding protein 4 (Sh3bp4), mRNA [NM_022693]
A_44_P1156140	0.039294556	down	2.0257394	-2.0257394	-1.0184486	Spart	Rattus norvegicus spastic paraplegia 20 (Troyer syndrome) (Spg20), mRNA [NM_001106433]
A_44_P435739	0.023665441	down	2.0249703	-2.0249703	-1.0179007	Hes1	Rattus norvegicus hes family bHLH transcription factor 1 (Hes1), mRNA [NM_024360]
A_44_P1125704	0.03717911	up	2.0247617	2.0247617	1.017752	Lnc081	Rattus norvegicus long non-coding RNA 081 (Lnc081), long non-coding RNA [NR_126576]
A_44_P1135156	0.034407295	up	2.0246327	2.0246327	1.0176601	LOC102550787	PREDICTED: Rattus norvegicus uncharacterized LOC102550787 (LOC102550787), transcript variant X1, ncRNA [XR_593892]
A_44_P390746	0.0069160853	up	2.0245795	2.0245795	1.0176224	Aff1	PREDICTED: Rattus norvegicus AF4/FMR2 family, member 1 (Aff1), transcript variant X1, mRNA [XM_006250632]
A_44_P1087971	0.010360872	down	2.0238645	-2.0238645	-1.0171127	Fam210b	Rattus norvegicus family with sequence similarity 210, member B (Fam210b), mRNA [NM_001106547]
A_42_P604121	0.0084686335	down	2.023692	-2.023692	-1.0169896	Tfg	Rattus norvegicus Trk-fused gene (Tfg), mRNA [NM_001012144]
A_44_P1162345	0.029066693	up	2.0226283	2.0226283	1.0162312	LOC102554622	PREDICTED: Rattus norvegicus SH3 domain-binding glutamic acid-rich-like protein 2-like (LOC102554622), transcript variant X2, mRNA [XM_006243468]
A_44_P1093027	0.008740335	down	2.0219843	-2.0219843	-1.0157719		maltase-glucoamylase [Source:MGI Symbol;Acc:MGI:1203495] [ENSRNOT00000016912]
A_64_P161571	0.016035844	up	2.0211005	2.0211005	1.015141	RGD1564712	Rattus norvegicus RGD1564712 (RGD1564712), mRNA [NM_001106931]
A_42_P773636	0.0075405207	down	2.020723	-2.020723	-1.0148716	Tnfsf13	Rattus norvegicus tumor necrosis factor superfamily member 13 (Tnfsf13), mRNA [NM_001009623]
A_44_P218695	0.013518045	down	2.0187607	-2.0187607	-1.0134699		UI-R-EP0-cnx-l-20-0-UI.s1 UI-R-EP0 Rattus norvegicus cDNA clone UI-R-EP0-cnx-l-20-0-UI 3', mRNA sequence [BQ209491]
A_44_P1163791	0.02330663	down	2.0183785	-2.0183785	-1.0131967	LOC103693437	PREDICTED: Rattus norvegicus uncharacterized LOC103693437 (LOC103693437), transcript variant X2, ncRNA [XR_001840296]
A_44_P1151737	0.026221048	down	2.0178351	-2.0178351	-1.0128083
A_44_P432358	0.027574325	down	2.0178092	-2.0178092	-1.0127897	Ugt1a6	Rattus norvegicus UDP glucuronosyltransferase family 1 member A6 (Ugt1a6), transcript variant 2, mRNA [NM_057105]
A_64_P029831	0.007998456	down	2.0168698	-2.0168698	-1.012118	Irf2bpl	Rattus norvegicus interferon regulatory factor 2 binding protein-like (Irf2bpl), mRNA [NM_001012470]
A_42_P695476	0.036571443	down	2.0166404	-2.0166404	-1.0119538	Commd6	Rattus norvegicus COMM domain containing 6 (Commd6), mRNA [NM_001109105]
A_44_P919148	0.040264584	down	2.01663	-2.01663	-1.0119463	Mxd4	Max dimerization protein 4 [Source:RGD Symbol;Acc:1305093] [ENSRNOT00000077060]
A_64_P013486	0.023192491	up	2.0165658	2.0165658	1.0119004	Fdxacb1	Rattus norvegicus ferredoxin-fold anticodon binding domain containing 1 (Fdxacb1), mRNA [NM_001108145]
A_44_P979659	0.009482816	down	2.015775	-2.015775	-1.0113345	Zfp952	PREDICTED: Rattus norvegicus zinc finger protein 952 (Zfp952), mRNA [XM_002729770]
A_44_P792495	0.00800754	up	2.0149388	2.0149388	1.010736	Mbnl3	PREDICTED: Rattus norvegicus muscleblind-like splicing regulator 3 (Mbnl3), transcript variant X1, mRNA [XM_008773556]
A_44_P1154516	0.029066911	up	2.0145807	2.0145807	1.0104796	Kmo	kynurenine 3-monooxygenase [Source:RGD Symbol;Acc:620610] [ENSRNOT00000005005]
A_64_P061765	0.020656155	up	2.0139568	2.0139568	1.0100327	Fam89a	Rattus norvegicus family with sequence similarity 89, member A (Fam89a), mRNA [NM_001011711]
A_44_P1082763	0.015177789	up	2.013486	2.013486	1.0096954	Zfand5	Rattus norvegicus zinc finger AN1-type containing 5 (Zfand5), mRNA [NM_001106356]
A_64_P022457	0.019900186	down	2.0129764	-2.0129764	-1.0093303
A_44_P1107763	0.008256204	down	2.0129688	-2.0129688	-1.0093248	Kctd17	Rattus norvegicus potassium channel tetramerization domain containing 17 (Kctd17), mRNA [NM_001134529]
A_64_P397603	0.019490676	up	2.0115623	2.0115623	1.0083164		AGENCOURT_50150647 NCI_CGAP_Pr50 Rattus norvegicus cDNA clone IMAGE:7935186 5', mRNA sequence [DN932216]
A_44_P1160848	0.0077102915	down	2.0114489	-2.0114489	-1.0082351	Ube3d	Rattus norvegicus ubiquitin protein ligase E3D (Ube3d), mRNA [NM_001039610]
A_64_P042127	0.010493734	down	2.010178	-2.010178	-1.0073233	Akr1c3	Rattus norvegicus aldo-keto reductase family 1, member C3 (Akr1c3), mRNA [NM_138510]
A_44_P1163563	0.025233036	up	2.009955	2.009955	1.0071632	LOC102546375	PREDICTED: Rattus norvegicus uncharacterized LOC102546375 (LOC102546375), transcript variant X2, ncRNA [XR_001836273]
A_64_P030267	0.011653272	up	2.0097287	2.0097287	1.0070007	Tex10	Rattus norvegicus testis expressed 10 (Tex10), mRNA [NM_001106653]
A_43_P15169	0.011480928	down	2.009208	-2.009208	-1.0066268	Pdk1	PREDICTED: Rattus norvegicus pyruvate dehydrogenase kinase 1 (Pdk1), transcript variant X1, mRNA [XM_006234352]
A_44_P1081204	0.0071980874	down	2.0081482	-2.0081482	-1.0058657	RGD1565410	Rattus norvegicus similar to Ly6-C antigen gene (RGD1565410), mRNA [NM_001113792]
A_44_P607486	0.006194118	up	2.0080624	2.0080624	1.0058041	Foxn3	Rattus norvegicus forkhead box N3 (Foxn3), mRNA [NM_001108047]
A_44_P905594	0.01515745	up	2.0080564	2.0080564	1.0057998	Alg11	PREDICTED: Rattus norvegicus ALG11, alpha-1,2-mannosyltransferase (Alg11), transcript variant X3, mRNA [XM_006253356]
A_44_P288908	0.015269161	down	2.007167	-2.007167	-1.0051607		FQ090704 Rattus norvegicus liver Sprague-Dawley Rattus norvegicus cDNA 3', mRNA sequence [FQ090704]
A_44_P1095736	0.006763548	down	2.0067546	-2.0067546	-1.0048642	LOC102552988	uncharacterized LOC102552988 [Source:RGD Symbol;Acc:7517962] [ENSRNOT00000038955]
A_44_P845503	0.00721723	up	2.0066013	2.0066013	1.004754	Ldlrad1	low density lipoprotein receptor class A domain containing 1 [Source:RGD Symbol;Acc:1597398] [ENSRNOT00000057372]
A_44_P512617	0.027403224	up	2.005013	2.005013	1.0036116	RGD1564804	Rattus norvegicus similar to chromosome 1 open reading frame 50 (RGD1564804), mRNA [NM_001107969]
A_44_P1099699	0.024978656	up	2.0044842	2.0044842	1.003231
A_44_P294087	0.015424141	up	2.0041542	2.0041542	1.0029935	Wbp1l	Rattus norvegicus WW domain binding protein 1-like (Wbp1l), transcript variant 2, mRNA [NM_001313908]
A_44_P410378	0.017437318	down	2.004033	-2.004033	-1.0029063	Erg28	Rattus norvegicus similar to HSPC288 (RGD1310769), mRNA [NM_001106749]
A_44_P1109355	0.0068175048	down	2.0027866	-2.0027866	-1.0020087
A_64_P035062	0.013471381	up	2.002726	2.002726	1.001965	Rims3	Rattus norvegicus regulating synaptic membrane exocytosis 3 (Rims3), mRNA [NM_022931]
A_44_P1091441	0.013554881	up	2.0008917	2.0008917	1.000643
A_64_P027868	0.042155616	up	2.0008602	2.0008602	1.0006204	Pex11a	Rattus norvegicus peroxisomal biogenesis factor 11 alpha (Pex11a), mRNA [NM_053487]
A_42_P640019	0.017283458	up	2.0004506	2.0004506	1.000325	Hdac4	PREDICTED: Rattus norvegicus histone deacetylase 4 (Hdac4), transcript variant X5, mRNA [XM_017596541]
A_44_P1160828	0.04112183	up	1.9998281	1.9998281	0.99987596	Sult1c2	Rattus norvegicus sulfotransferase family 1C member 2 (Sult1c2), mRNA [NM_133547]
A_42_P727022	0.01099688	down	1.9992945	-1.9992945	-0.999491	Rab40b	Rattus norvegicus Rab40b, member RAS oncogene family (Rab40b), mRNA [NM_001107076]
A_44_P1162420	0.010516161	down	1.9986509	-1.9986509	-0.9990265
A_44_P104483	0.030402953	down	1.9981711	-1.9981711	-0.9986801	Bicdl1	Rattus norvegicus coiled-coil domain containing 64 (Ccdc64), mRNA [NM_001191667]
A_43_P10275	0.023785073	up	1.9980192	1.9980192	0.99857044	Crebrf	Rattus norvegicus CREB3 regulatory factor (Crebrf), mRNA [NM_001277157]
A_44_P402507	0.04316821	up	1.99745	1.99745	0.99815935	Retsat	Rattus norvegicus retinol saturase (Retsat), mRNA [NM_145084]
A_42_P581686	0.013804589	up	1.9973992	1.9973992	0.9981227	Pdia5	Rattus norvegicus protein disulfide isomerase family A, member 5 (Pdia5), mRNA [NM_001014125]
A_44_P683157	0.02563291	up	1.9968969	1.9968969	0.9977598	Zfp133	Rattus norvegicus zinc finger protein 133 (Zfp133), mRNA [NM_001024313]
A_44_P1162800	0.024559237	down	1.9963713	-1.9963713	-0.99738
A_44_P1085517	0.008215766	up	1.9952996	1.9952996	0.99660534	Sin3a	Rattus norvegicus SIN3 transcription regulator family member A (Sin3a), mRNA [NM_001108761]
A_44_P1119657	0.02134354	up	1.994931	1.994931	0.99633884	LOC102550730	PREDICTED: Rattus norvegicus uncharacterized LOC102550730 (LOC102550730), ncRNA [XR_599556]
A_44_P1138028	0.012819212	up	1.9946742	1.9946742	0.9961531	LOC102552189	PREDICTED: Rattus norvegicus uncharacterized LOC102552189 (LOC102552189), ncRNA [XR_596780]
A_44_P1116055	0.009822476	up	1.9946251	1.9946251	0.9961176	Arhgap6	PREDICTED: Rattus norvegicus Rho GTPase activating protein 6 (Arhgap6), transcript variant X2, mRNA [XM_017602285]
A_43_P11069	0.046952523	up	1.9941322	1.9941322	0.99576104		BP465127 Rattus norvegicus pancreatic islet Rattus norvegicus cDNA clone RBC04195 3', mRNA sequence [BP465127]
A_44_P807734	0.029723033	down	1.9937979	-1.9937979	-0.99551916	Tnfaip8l1	PREDICTED: Rattus norvegicus TNF alpha induced protein 8 like 1 (Tnfaip8l1), transcript variant X1, mRNA [XM_017596710]
A_44_P1147643	0.037074115	up	1.9932014	1.9932014	0.99508744	LOC102553977	PREDICTED: Rattus norvegicus uncharacterized LOC102553977 (LOC102553977), ncRNA [XR_357442]
A_42_P677337	0.009410944	up	1.9931198	1.9931198	0.99502844	Erbb3	erb-b2 receptor tyrosine kinase 3 [Source:RGD Symbol;Acc:69323] [ENSRNOT00000006796]
A_44_P1146930	0.02625653	up	1.9927927	1.9927927	0.9947916	LOC103693130	PREDICTED: Rattus norvegicus uncharacterized LOC103693130 (LOC103693130), ncRNA [XR_593992]
A_44_P1157066	0.03331793	up	1.9925735	1.9925735	0.9946329	Nr1h5	nuclear receptor subfamily 1, group H, member 5 [Source:RGD Symbol;Acc:1596077] [ENSRNOT00000036229]
A_44_P250371	0.009464041	down	1.9917649	-1.9917649	-0.99404734
A_42_P655076	0.0064255665	up	1.991706	1.991706	0.9940047		UI-R-C1-kb-b-07-0-UI.r1 UI-R-C1 Rattus norvegicus cDNA clone UI-R-C1-kb-b-07-0-UI 5', mRNA sequence [BF550923]
A_44_P1127059	0.011576515	down	1.9915981	-1.9915981	-0.9939265	LOC102547173	PREDICTED: Rattus norvegicus uncharacterized LOC102547173 (LOC102547173), ncRNA [XR_347364]
A_44_P154793	0.0070820176	down	1.9914961	-1.9914961	-0.9938526	Iqcg	Rattus norvegicus IQ motif containing G (Iqcg), mRNA [NM_001014230]
A_44_P1118615	0.026803814	up	1.991369	1.991369	0.9937606	LOC103695042	PREDICTED: Rattus norvegicus uncharacterized LOC103695042 (LOC103695042), ncRNA [XR_599057]
A_44_P1153623	0.0091785975	up	1.9912914	1.9912914	0.9937043	Rp9	Rattus norvegicus retinitis pigmentosa 9 (Rp9), mRNA [NM_001108756]
A_64_P041471	0.040065143	down	1.9910505	-1.9910505	-0.9935298	Ccdc138	coiled-coil domain containing 138 [Source:RGD Symbol;Acc:1566050] [ENSRNOT00000030005]
A_44_P1082543	0.04786034	down	1.9907783	-1.9907783	-0.99333256	Meiob	Rattus norvegicus meiosis specific with OB domains (Meiob), mRNA [NM_001115033]
A_44_P242429	0.032682203	down	1.9905132	-1.9905132	-0.99314046	Tbc1d31	Rattus norvegicus TBC1 domain family, member 31 (Tbc1d31), mRNA [NM_001134842]
A_44_P1090959	0.043779034	down	1.989544	-1.989544	-0.99243784	RGD1563034	PREDICTED: Rattus norvegicus similar to ETS domain transcription factor ERF (Ets2 repressor factor) (RGD1563034), mRNA [XM_017588489]
A_64_P043431	0.024340538	up	1.9889148	1.9889148	0.9919815	Cgrrf1	Rattus norvegicus cell growth regulator with ring finger domain 1 (Cgrrf1), mRNA [NM_053899]
A_64_P105417	0.023420103	up	1.9888445	1.9888445	0.9919305	Fcrla	Rattus norvegicus Fc receptor-like A (Fcrla), mRNA [NM_001100682]
A_44_P214811	0.007559617	down	1.9881202	-1.9881202	-0.99140495	Tfrc	Rattus norvegicus transferrin receptor (Tfrc), mRNA [NM_022712]
A_44_P1049865	0.045547068	up	1.9878023	1.9878023	0.9911742	Crot	Rattus norvegicus carnitine O-octanoyltransferase (Crot), mRNA [NM_031987]
A_44_P1125811	0.013949736	up	1.9874811	1.9874811	0.99094117
A_44_P1159206	0.04485312	up	1.987124	1.987124	0.9906819	Prr33	PREDICTED: Rattus norvegicus proline rich 33 (Prr33), transcript variant X1, mRNA [XM_001064406]
A_64_P077985	0.009411008	up	1.9869334	1.9869334	0.9905435	Zfp319	Rattus norvegicus zinc finger protein 319 (Zfp319), mRNA [NM_001170478]
A_44_P531611	0.023069765	down	1.9868942	-1.9868942	-0.99051505	Mcf2l	Rattus norvegicus MCF.2 cell line derived transforming sequence-like (Mcf2l), mRNA [NM_053951]
A_64_P059120	0.04130047	up	1.9868859	1.9868859	0.99050903	Aen	Rattus norvegicus apoptosis enhancing nuclease (Aen), mRNA [NM_001108487]
A_43_P18376	0.012616675	up	1.9862392	1.9862392	0.99003935	Tex49	Rattus norvegicus hypothetical LOC300207 (RGD1305928), mRNA [NM_001134528]
A_44_P1132623	0.042647578	up	1.9860393	1.9860393	0.98989415	LOC102548866	PREDICTED: Rattus norvegicus uncharacterized LOC102548866 (LOC102548866), transcript variant X1, ncRNA [XR_339114]
A_64_P315172	0.035720218	up	1.9857613	1.9857613	0.9896922	Nat2	Rattus norvegicus N-acetyltransferase 2 (Nat2), mRNA [NM_053854]
A_44_P1137001	0.019143505	up	1.9851953	1.9851953	0.98928094	LOC102553008	PREDICTED: Rattus norvegicus uncharacterized LOC102553008 (LOC102553008), ncRNA [XR_341113]
A_44_P1101740	0.013215589	up	1.9849026	1.9849026	0.9890682	Tspan32	tetraspanin 32 [Source:RGD Symbol;Acc:1308721] [ENSRNOT00000054863]
A_44_P529161	0.014632774	up	1.9848763	1.9848763	0.9890491		UI-R-BJ0p-afm-e-09-0-UI.s1 UI-R-BJ0p Rattus norvegicus cDNA clone UI-R-BJ0p-afm-e-09-0-UI 3', mRNA sequence [AW433866]
A_44_P1085706	0.015380217	down	1.983377	-1.983377	-0.9879589	Lbr	Rattus norvegicus lamin B receptor (Lbr), mRNA [NM_134453]
A_44_P1106372	0.009681253	up	1.9814215	1.9814215	0.9865358	RGD1311517	PREDICTED: Rattus norvegicus similar to RIKEN cDNA 9430015G10 (RGD1311517), transcript variant X2, mRNA [XM_008764363]
A_44_P1150248	0.037889432	up	1.9813952	1.9813952	0.98651665	Ammecr1l	Rattus norvegicus AMMECR1 like (Ammecr1l), mRNA [NM_001107399]
A_44_P1086908	0.028551817	down	1.9811971	-1.9811971	-0.9863724	Lmod2	Rattus norvegicus leiomodin 2 (Lmod2), mRNA [NM_001100964]
A_43_P12116	0.013457092	up	1.9810171	1.9810171	0.98624134	Birc2	PREDICTED: Rattus norvegicus baculoviral IAP repeat-containing 2 (Birc2), transcript variant X3, mRNA [XM_017595882]
A_44_P1150141	0.03519128	up	1.9809425	1.9809425	0.986187	LOC103694130	PREDICTED: Rattus norvegicus uncharacterized LOC103694130 (LOC103694130), ncRNA [XR_596858]
A_64_P054626	0.0149566755	up	1.9808242	1.9808242	0.98610085	Hcn4	Rattus norvegicus hyperpolarization activated cyclic nucleotide-gated potassium channel 4 (Hcn4), mRNA [NM_021658]
A_44_P375597	0.011926951	up	1.9788165	1.9788165	0.98463786	Paqr8	Rattus norvegicus progestin and adipoQ receptor family member 8 (Paqr8), mRNA [NM_001014099]
A_44_P114023	0.019704698	down	1.9786862	-1.9786862	-0.98454285	Mis12	Rattus norvegicus MIS12 kinetochore complex component (Mis12), mRNA [NM_001047972]
A_44_P1097141	0.014530114	up	1.9783785	1.9783785	0.9843185
A_44_P357579	0.0075606313	up	1.9770389	1.9770389	0.9833412	Ddx3x	Rattus norvegicus DEAD-box helicase 3, X-linked (Ddx3x), mRNA [NM_001108246]
A_44_P807184	0.0120295305	up	1.9764919	1.9764919	0.98294204	Rnf144b	ring finger protein 144B [Source:RGD Symbol;Acc:1308856] [ENSRNOT00000082733]
A_42_P457692	0.011553741	up	1.9764181	1.9764181	0.98288816	Zfand2a	Rattus norvegicus zinc finger AN1-type containing 2A (Zfand2a), mRNA [NM_001008363]
A_44_P1099665	0.013266879	down	1.9761144	-1.9761144	-0.98266643		PREDICTED: Rattus norvegicus ralA-binding protein 1-like (LOC680627), misc_RNA [XR_147135]
A_44_P1367041	0.0075985617	down	1.9757428	-1.9757428	-0.9823952	Rpa3	Rattus norvegicus replication protein A3 (Rpa3), mRNA [NM_001106584]
A_44_P1003372	0.01842436	up	1.975146	1.975146	0.98195934	Smpdl3a	Rattus norvegicus sphingomyelin phosphodiesterase, acid-like 3A (Smpdl3a), mRNA [NM_001005539]
A_64_P092201	0.03752846	up	1.9745736	1.9745736	0.98154116	Cp	Rattus norvegicus ceruloplasmin (Cp), transcript variant 2, mRNA [NM_001270961]
A_44_P637827	0.017234078	up	1.9743426	1.9743426	0.98137236	Fam117b	Rattus norvegicus family with sequence similarity 117, member B (Fam117b), mRNA [NM_001108797]
A_44_P1131268	0.013595062	up	1.9735355	1.9735355	0.9807825	LOC102550048	PREDICTED: Rattus norvegicus uncharacterized LOC102550048 (LOC102550048), transcript variant X3, ncRNA [XR_338499]
A_44_P144538	0.029319989	up	1.9730111	1.9730111	0.9803991	Ebf2	Rattus norvegicus early B-cell factor 2 (Ebf2), mRNA [NM_001108383]
A_43_P11225	0.007395614	up	1.97291	1.97291	0.98032516	Kbtbd2	Rattus norvegicus kelch repeat and BTB domain containing 2 (Kbtbd2), mRNA [NM_001107861]
A_64_P164764	0.012749821	up	1.9727001	1.9727001	0.9801716	MGC105567	Rattus norvegicus similar to cDNA sequence BC023105 (MGC105567), mRNA [NM_001024284]
A_44_P715937	0.01567337	up	1.9726402	1.9726402	0.9801278	Ikzf5	Rattus norvegicus IKAROS family zinc finger 5 (Ikzf5), mRNA [NM_001107555]
A_44_P1364618	0.04377192	down	1.9725704	-1.9725704	-0.9800768	Tuba1b	Rattus norvegicus tubulin, alpha 1B (Tuba1b), mRNA [NM_001044270]
A_64_P100078	0.03613979	down	1.972349	-1.972349	-0.9799149	Cd274	Rattus norvegicus CD274 molecule (Cd274), mRNA [NM_001191954]
A_44_P1113959	0.014254031	up	1.9721649	1.9721649	0.97978014
A_44_P456722	0.009064966	up	1.9719342	1.9719342	0.9796114	Pbx1	Rattus norvegicus PBX homeobox 1 (Pbx1), transcript variant 2, mRNA [NM_001100681]
A_44_P1080106	0.009197011	up	1.9701211	1.9701211	0.97828436	Ier5	Rattus norvegicus immediate early response 5 (Ier5), mRNA [NM_001025137]
A_44_P116875	0.049835436	down	1.9699242	-1.9699242	-0.9781401	Rorc	RAR-related orphan receptor C [Source:RGD Symbol;Acc:1595785] [ENSRNOT00000067042]
A_44_P314270	0.015673524	up	1.9696374	1.9696374	0.97793007	Fam188b	family with sequence similarity 188, member B [Source:RGD Symbol;Acc:1562590] [ENSRNOT00000015469]
A_44_P1161440	0.024385802	up	1.9692482	1.9692482	0.9776449	Il15	PREDICTED: Rattus norvegicus interleukin 15 (Il15), transcript variant X2, mRNA [XM_008774217]
A_44_P415337	0.012952147	up	1.96848	1.96848	0.977082		UI-R-EP0-cnv-d-08-0-UI.s1 UI-R-EP0 Rattus norvegicus cDNA clone UI-R-EP0-cnv-d-08-0-UI 3', mRNA sequence [BQ206150]
A_64_P024772	0.040134806	up	1.9675508	1.9675508	0.97640085		immunoglobulin heavy constant mu [Source:MGI Symbol;Acc:MGI:96448] [ENSRNOT00000048378]
A_64_P073078	0.014240463	down	1.9668804	-1.9668804	-0.97590923	Fdft1	Rattus norvegicus farnesyl diphosphate farnesyl transferase 1 (Fdft1), mRNA [NM_019238]
A_44_P1108235	0.008992688	up	1.9662701	1.9662701	0.9754615	Hykk	PREDICTED: Rattus norvegicus hydroxylysine kinase (Hykk), transcript variant X1, mRNA [XM_006243072]
A_44_P1148228	0.04617085	down	1.9656749	-1.9656749	-0.9750247	LOC108352368	PREDICTED: Rattus norvegicus uncharacterized LOC108352368 (LOC108352368), ncRNA [XR_001840573]
A_44_P164101	0.02815206	up	1.9648161	1.9648161	0.97439426	Mettl7a	Rattus norvegicus methyltransferase like 7A (Mettl7a), mRNA [NM_001037355]
A_64_P050727	0.009852544	down	1.9645531	-1.9645531	-0.97420114	Serf1	PREDICTED: Rattus norvegicus small EDRK-rich factor 1 (Serf1), partial mRNA [XM_001070716]
A_64_P029932	0.03839165	up	1.9639806	1.9639806	0.97378063	Tmie	Rattus norvegicus transmembrane inner ear (Tmie), mRNA [NM_001109299]
A_43_P10711	0.025710098	up	1.9636887	1.9636887	0.97356623	Psma7	PSA7_RAT (P48004) Proteasome subunit alpha type 7 (Proteasome subunit RC6-1) , partial (12%) [TC625776]
A_44_P1365381	0.008163751	down	1.9629225	-1.9629225	-0.97300315	Arl16	ADP-ribosylation factor like GTPase 16 [Source:RGD Symbol;Acc:1590059] [ENSRNOT00000071433]
A_42_P697450	0.013153605	up	1.9603397	1.9603397	0.9711036	Il6st	Rattus norvegicus interleukin 6 signal transducer (Il6st), mRNA [NM_001008725]
A_44_P243279	0.034206856	down	1.9601903	-1.9601903	-0.9709937	Parvb	Rattus norvegicus parvin, beta (Parvb), mRNA [NM_001134780]
A_44_P761949	0.021420646	down	1.9600687	-1.9600687	-0.97090423	Cep95	Rattus norvegicus centrosomal protein 95 (Cep95), mRNA [NM_001013862]
A_42_P772143	0.007295953	down	1.9590527	-1.9590527	-0.9701562
A_44_P1133505	0.016902903	down	1.9587153	-1.9587153	-0.9699077	LOC102554260	PREDICTED: Rattus norvegicus uncharacterized LOC102554260 (LOC102554260), transcript variant X1, ncRNA [XR_358625]
A_44_P1101605	0.019509707	up	1.958067	1.958067	0.96943015
A_42_P569464	0.03144441	down	1.95783	-1.95783	-0.96925545	Sri	PREDICTED: Rattus norvegicus sorcin (Sri), transcript variant X1, mRNA [XM_006236007]
A_44_P1114550	0.009876077	up	1.9572988	1.9572988	0.96886396
A_44_P312217	0.010095001	up	1.9571613	1.9571613	0.96876264	Rnf138	Rattus norvegicus ring finger protein 138 (Rnf138), mRNA [NM_053588]
A_64_P043154	0.030727223	up	1.9565626	1.9565626	0.96832126		Rattus norvegicus chromosome 8, 32 clones, strain BN/SsNHsdMCW RNOR03312986, whole genome shotgun sequence [AABR03063211]
A_64_P054251	0.016212422	up	1.9565343	1.9565343	0.96830034	Pax3	Rattus norvegicus paired box 3 (Pax3), mRNA [NM_053710]
A_43_P13792	0.03128396	up	1.9562097	1.9562097	0.968061		UI-R-A1-ep-h-12-0-UI.s1 UI-R-A1 Rattus norvegicus cDNA clone UI-R-A1-ep-h-12-0-UI 3', mRNA sequence [AA925776]
A_44_P1150049	0.020328749	up	1.9560862	1.9560862	0.9679699
A_44_P447373	0.0073044454	up	1.9556491	1.9556491	0.96764755	Ass1	Rattus norvegicus argininosuccinate synthase 1 (Ass1), mRNA [NM_013157]
A_44_P1127616	0.04943163	up	1.954549	1.954549	0.9668357
A_44_P318444	0.04459501	down	1.9544433	-1.9544433	-0.9667578	Bco2	Rattus norvegicus beta-carotene oxygenase 2 (Bco2), mRNA [NM_001127712]
A_44_P1162370	0.009534206	up	1.9543189	1.9543189	0.96666586
A_64_P110798	0.02870951	down	1.9542311	-1.9542311	-0.96660113	Serinc2	Rattus norvegicus serine incorporator 2 (Serinc2), mRNA [NM_001031656]
A_44_P543017	0.044173576	up	1.9542063	1.9542063	0.9665828	Nhlrc1	Rattus norvegicus NHL repeat containing E3 ubiquitin protein ligase 1 (Nhlrc1), mRNA [NM_199236]
A_42_P641830	0.029688472	down	1.9541036	-1.9541036	-0.96650696	LOC100911506	PREDICTED: Rattus norvegicus uncharacterized LOC100911506 (LOC100911506), ncRNA [XR_146284]
A_44_P214687	0.012430822	up	1.9540244	1.9540244	0.9664485	Rnf185	Rattus norvegicus ring finger protein 185 (Rnf185), mRNA [NM_001024271]
A_44_P1363584	0.008083342	up	1.9538679	1.9538679	0.9663329	Trappc9	Rattus norvegicus trafficking protein particle complex 9 (Trappc9), mRNA [NM_001034156]
A_44_P559080	0.048625972	up	1.9537487	1.9537487	0.9662449	Ankrd44	Rattus norvegicus ankyrin repeat domain 44 (Ankrd44), mRNA [NM_001191807]
A_64_P028492	0.008337834	down	1.9533083	-1.9533083	-0.9659197		exocyst complex component 3-like 2 [Source:RGD Symbol;Acc:1592539] [ENSRNOT00000023451]
A_44_P1155137	0.007416653	down	1.9518018	-1.9518018	-0.96480656		maltase-glucoamylase [Source:MGI Symbol;Acc:MGI:1203495] [ENSRNOT00000016912]
A_43_P20587	0.012601819	down	1.9503515	-1.9503515	-0.96373415	Gypc	Rattus norvegicus glycophorin C (Gerbich blood group) (Gypc), mRNA [NM_001013233]
A_44_P415349	0.041898567	down	1.9500715	-1.9500715	-0.96352696	Gata6	Rattus norvegicus GATA binding protein 6 (Gata6), mRNA [NM_019185]
A_44_P1047924	0.039946176	down	1.9495118	-1.9495118	-0.96311283	Herpud1	Rattus norvegicus homocysteine inducible ER protein with ubiquitin like domain 1 (Herpud1), mRNA [NM_053523]
A_64_P085926	0.011986717	up	1.9493275	1.9493275	0.96297646	Mef2d	Rattus norvegicus myocyte enhancer factor 2D (Mef2d), mRNA [NM_030860]
A_44_P1123727	0.034092445	up	1.9491788	1.9491788	0.9628664	LOC102555694	PREDICTED: Rattus norvegicus uncharacterized LOC102555694 (LOC102555694), ncRNA [XR_592108]
A_44_P1095168	0.022279227	up	1.9491155	1.9491155	0.9628196	LOC103690486	PREDICTED: Rattus norvegicus uncharacterized LOC103690486 (LOC103690486), mRNA [XM_008757897]
A_43_P18775	0.013585564	down	1.9491142	-1.9491142	-0.9628186	Trappc12	trafficking protein particle complex 12 [Source:RGD Symbol;Acc:1566054] [ENSRNOT00000029859]
A_44_P1108875	0.039915867	up	1.9490877	1.9490877	0.962799
A_44_P1364101	0.0073672244	up	1.948311	1.948311	0.96222395
A_64_P036736	0.039546117	up	1.9477847	1.9477847	0.9618342	RGD1564409	PREDICTED: Rattus norvegicus similar to hypothetical protein 4930509O22 (RGD1564409), transcript variant X2, mRNA [XM_002727434]
A_44_P1102363	0.016027406	up	1.947604	1.947604	0.9617003
A_42_P539095	0.007579345	down	1.9475307	-1.9475307	-0.9616461	Arl16	PREDICTED: Rattus norvegicus ADP-ribosylation factor like GTPase 16 (Arl16), mRNA [XM_002724584]
A_64_P071327	0.008486687	up	1.947236	1.947236	0.9614277	Apoc4	Rattus norvegicus apolipoprotein C4 (Apoc4), mRNA [NM_001109419]
A_64_P068743	0.022146566	down	1.9467775	-1.9467775	-0.96108794	Mycl	v-myc avian myelocytomatosis viral oncogene lung carcinoma derived homolog [Source:RGD Symbol;Acc:1588591] [ENSRNOT00000019101]
A_44_P807146	0.02085801	up	1.9456038	1.9456038	0.96021795	LOC102546572	PREDICTED: Rattus norvegicus zinc finger protein 709-like (LOC102546572), transcript variant X2, mRNA [XM_006225950]
A_44_P1086475	0.02626536	down	1.9455826	-1.9455826	-0.9602022	Fgd1	Rattus norvegicus FYVE, RhoGEF and PH domain containing 1 (Fgd1), mRNA [NM_001037546]
A_44_P1139569	0.018640533	up	1.9455328	1.9455328	0.96016526
A_42_P457783	0.041933578	down	1.9454817	-1.9454817	-0.96012735	Tifab	Rattus norvegicus TIFA inhibitor (Tifab), mRNA [NM_001025029]
A_64_P299808	0.03470645	down	1.945472	-1.945472	-0.9601202	Hmgn5	Rattus norvegicus high mobility group nucleosome binding domain 5 (Hmgn5), mRNA [NM_001276434]
A_44_P258277	0.013288839	down	1.9449419	-1.9449419	-0.95972705	Dhrs7b	Rattus norvegicus dehydrogenase/reductase 7B (Dhrs7b), mRNA [NM_001008507]
A_64_P041054	0.020926373	up	1.9449122	1.9449122	0.959705		BAH domain and coiled-coil containing 1 [Source:RGD Symbol;Acc:1306500] [ENSRNOT00000066736]
A_44_P650867	0.018825285	up	1.9445443	1.9445443	0.9594321		EST348501 Rat gene index, normalized rat, norvegicus, Bento Soares Rattus norvegicus cDNA clone RGIEA58 5' end, mRNA sequence [AW917197]
A_64_P091243	0.009099867	up	1.944402	1.944402	0.9593265	Faxdc2	PREDICTED: Rattus norvegicus fatty acid hydroxylase domain containing 2 (Faxdc2), mRNA [XM_017597634]
A_44_P253755	0.009773097	up	1.942936	1.942936	0.9582383	Tspyl5	PREDICTED: Rattus norvegicus TSPY-like 5 (Tspyl5), mRNA [XM_006226056]
A_44_P1007870	0.01726711	up	1.9427192	1.9427192	0.9580774	Wfdc3	Rattus norvegicus WAP four-disulfide core domain 3 (Wfdc3), mRNA [NM_001106541]
A_42_P822689	0.034889426	down	1.9425793	-1.9425793	-0.9579735	Apol11a	PREDICTED: Rattus norvegicus apolipoprotein L 11a (Apol11a), transcript variant X1, mRNA [XM_006226144]
A_44_P1366151	0.009023934	up	1.9425282	1.9425282	0.9579356		cytochrome P450, family 2, subfamily c, polypeptide 7 [Source:RGD Symbol;Acc:620379] [ENSRNOT00000030039]
A_44_P173156	0.011371663	up	1.9421905	1.9421905	0.9576847	Taf5	Rattus norvegicus TATA-box binding protein associated factor 5 (Taf5), mRNA [NM_001106365]
A_44_P1104533	0.020492557	up	1.942119	1.942119	0.9576316		ATP binding cassette subfamily B member 1A [Source:RGD Symbol;Acc:619951] [ENSRNOT00000037712]
A_44_P1132514	0.022522999	up	1.9421029	1.9421029	0.9576196
A_44_P1365579	0.016822586	up	1.9419713	1.9419713	0.95752186		spermiogenesis specific transcript on the Y 1 [Source:RGD Symbol;Acc:1595895] [ENSRNOT00000071530]
A_64_P065947	0.014073215	up	1.9415278	1.9415278	0.95719236	Ube2b	Rattus norvegicus ubiquitin-conjugating enzyme E2B (Ube2b), mRNA [NM_031138]
A_43_P11261	0.04972361	up	1.9411871	1.9411871	0.9569392	Ahnak2	PREDICTED: Rattus norvegicus AHNAK nucleoprotein 2 (Ahnak2), transcript variant X4, mRNA [XM_017603172]
A_64_P067968	0.020028166	down	1.9404742	-1.9404742	-0.9564092	Bach2	Rattus norvegicus BTB domain and CNC homolog 2 (Bach2), mRNA [NM_001135754]
A_64_P080643	0.029025739	up	1.9403696	1.9403696	0.9563315	Erbb3	Rattus norvegicus erb-b2 receptor tyrosine kinase 3 (Erbb3), mRNA [NM_017218]
A_44_P249315	0.021874543	up	1.9403306	1.9403306	0.95630246		UI-R-CT0s-cas-b-09-0-UI.s1 UI-R-CT0s Rattus norvegicus cDNA clone UI-R-CT0s-cas-b-09-0-UI 3', mRNA sequence [BI285673]
A_44_P1106237	0.020363906	up	1.9402075	1.9402075	0.9562109	Ifnlr1	interferon, lambda receptor 1 [Source:RGD Symbol;Acc:1562689] [ENSRNOT00000049459]
A_64_P146970	0.012008316	up	1.9399403	1.9399403	0.95601225	Cacng2	Rattus norvegicus calcium voltage-gated channel auxiliary subunit gamma 2 (Cacng2), mRNA [NM_053351]
A_44_P495611	0.0101458635	up	1.9399022	1.9399022	0.9559839	Wdfy3	Rattus norvegicus WD repeat and FYVE domain containing 3 (Wdfy3), mRNA [NM_001170551]
A_44_P1130679	0.019916162	up	1.93902	1.93902	0.9553277
A_44_P1100629	0.027432786	up	1.9387512	1.9387512	0.95512766	Sult2a1	PREDICTED: Rattus norvegicus sulfotransferase family 2A, dehydroepiandrosterone (DHEA)-preferring, member 1 (Sult2a1), transcript variant X1, mRNA [XM_008758891]
A_42_P694171	0.024435619	down	1.9386629	-1.9386629	-0.955062	Ppil3	Rattus norvegicus peptidylprolyl isomerase like 3 (Ppil3), mRNA [NM_175707]
A_64_P080612	0.025391022	down	1.9373491	-1.9373491	-0.9540839	Tspoap1	PREDICTED: Rattus norvegicus TSPO associated protein 1 (Tspoap1), transcript variant X1, mRNA [XM_017597680]
A_43_P13739	0.03679449	up	1.9371781	1.9371781	0.9539566	Slc25a15	solute carrier family 25 member 15 [Source:RGD Symbol;Acc:1311488] [ENSRNOT00000078971]
A_44_P1121550	0.019136924	up	1.9371394	1.9371394	0.95392776
A_44_P1111446	0.011671776	down	1.937068	-1.937068	-0.9538746	Nyap1	Rattus norvegicus neuronal tyrosine-phosphorylated phosphoinositide-3-kinase adaptor 1 (Nyap1), mRNA [NM_001107132]
A_44_P553316	0.008757573	up	1.9368716	1.9368716	0.9537283	Col8a2	collagen type VIII alpha 2 chain [Source:RGD Symbol;Acc:1305182] [ENSRNOT00000014388]
A_44_P487856	0.026686028	down	1.9365127	-1.9365127	-0.95346093	Tymp	Rattus norvegicus thymidine phosphorylase (Tymp), mRNA [NM_001012122]
A_44_P507881	0.027902273	up	1.9362074	1.9362074	0.9532335	LOC100912093	UI-R-DZ1-cng-i-10-0-UI.s1 UI-R-DZ1 Rattus norvegicus cDNA clone UI-R-DZ1-cng-i-10-0-UI 3', mRNA sequence [BQ201580]
A_44_P988320	0.012719898	down	1.935824	-1.935824	-0.9529478	LOC680227	LRRGT00193 [Source:RGD Symbol;Acc:1594204] [ENSRNOT00000076538]
A_44_P1048663	0.027192196	up	1.935715	1.935715	0.9528665	Ccnl1	Rattus norvegicus cyclin L1 (Ccnl1), mRNA [NM_053662]
A_64_P105221	0.03411462	down	1.9355532	-1.9355532	-0.9527459	Unc5cl	Rattus norvegicus unc-5 family C-terminal like (Unc5cl), mRNA [NM_001106882]
A_44_P1142280	0.020280624	up	1.9352744	1.9352744	0.9525381
A_42_P518462	0.012425394	down	1.9333025	-1.9333025	-0.9510674	Hmgn3	Rattus norvegicus high mobility group nucleosomal binding domain 3 (Hmgn3), transcript variant 2, mRNA [NM_001007020]
A_44_P431154	0.018428652	down	1.9326273	-1.9326273	-0.95056343	Zfp428	Rattus norvegicus zinc finger protein 428 (Zfp428), mRNA [NM_001108476]
A_42_P485932	0.03950947	up	1.9325678	1.9325678	0.950519	Sulf2	Rattus norvegicus sulfatase 2 (Sulf2), mRNA [NM_001034927]
A_44_P613019	0.014706831	up	1.9321033	1.9321033	0.9501722	Zfp41	zinc finger protein 41 [Source:RGD Symbol;Acc:1307587] [ENSRNOT00000076606]
A_44_P309499	0.01496522	up	1.9319254	1.9319254	0.9500394	Klhl34	kelch-like family member 34 [Source:RGD Symbol;Acc:1560439] [ENSRNOT00000050708]
A_44_P1152049	0.034009006	up	1.9313849	1.9313849	0.9496357	Cyp3a23/3a1
A_43_P13183	0.014961767	up	1.9312627	1.9312627	0.9495444	Syf2	Rattus norvegicus SYF2 pre-mRNA-splicing factor (Syf2), mRNA [NM_133417]
A_44_P377835	0.007818079	down	1.931129	-1.931129	-0.94944453	Wnt1	Rattus norvegicus wingless-type MMTV integration site family, member 1 (Wnt1), mRNA [NM_001105714]
A_44_P549304	0.019144345	down	1.9310578	-1.9310578	-0.94939137	Il18bp	Rattus norvegicus interleukin 18 binding protein (Il18bp), mRNA [NM_053374]
A_44_P1155728	0.041737128	up	1.9304551	1.9304551	0.948941	Btbd18	BTB domain containing 18 [Source:RGD Symbol;Acc:2323370] [ENSRNOT00000066606]
A_44_P1142694	0.032464545	up	1.9303651	1.9303651	0.9488737
A_44_P1098096	0.035453912	up	1.9296482	1.9296482	0.9483378	LOC102547897	PREDICTED: Rattus norvegicus uncharacterized LOC102547897 (LOC102547897), mRNA [XM_008771902]
A_64_P119745	0.010881609	down	1.9292116	-1.9292116	-0.9480114	Mettl1	methyltransferase like 1 [Source:RGD Symbol;Acc:1593036] [ENSRNOT00000075544]
A_64_P012902	0.026487393	down	1.9289209	-1.9289209	-0.94779396	Sdf2l1	Rattus norvegicus stromal cell-derived factor 2-like 1 (Sdf2l1), mRNA [NM_001109433]
A_44_P1051106	0.008779195	up	1.9280578	1.9280578	0.94714826	LOC680875	similar to dystonin isoform 1 [Source:RGD Symbol;Acc:1587008] [ENSRNOT00000014191]
A_64_P061865	0.014422159	up	1.9280218	1.9280218	0.9471213	Tfcp2	Rattus norvegicus transcription factor CP2 (Tfcp2), mRNA [NM_001134714]
A_44_P1007110	0.011946129	down	1.9273983	-1.9273983	-0.94665474	Svip	Rattus norvegicus small VCP interacting protein (Svip), mRNA [NM_001271084]
A_44_P112788	0.035833452	up	1.9270073	1.9270073	0.946362	Bcl2l2	Rattus norvegicus Bcl2-like 2 (Bcl2l2), mRNA [NM_021850]
A_44_P1094847	0.016141789	down	1.9262353	-1.9262353	-0.945784	LOC103690166	PREDICTED: Rattus norvegicus zinc finger protein OZF-like (LOC103690166), mRNA [XM_008776659]
A_42_P463880	0.008998064	down	1.925632	-1.925632	-0.945332	Plbd1	Rattus norvegicus phospholipase B domain containing 1 (Plbd1), mRNA [NM_001013927]
A_44_P237564	0.039077967	up	1.9254627	1.9254627	0.94520515		UI-R-E1-gh-h-04-0-UI.r1 UI-R-E1 Rattus norvegicus cDNA clone UI-R-E1-gh-h-04-0-UI 5', mRNA sequence [BF560252]
A_44_P1097379	0.04236982	up	1.9236848	1.9236848	0.94387245	LOC108351873	PREDICTED: Rattus norvegicus endogenous retrovirus group K member 9 Pol protein-like (LOC108351873), partial mRNA [XM_017596685]
A_44_P1054708	0.009901971	up	1.9227005	1.9227005	0.94313407	Zfp868	Rattus norvegicus zinc finger protein 868 (Zfp868), mRNA [NM_001009538]
A_44_P803553	0.028236348	down	1.922423	-1.922423	-0.9429258	Bicc1	BicC family RNA binding protein 1 [Source:RGD Symbol;Acc:1307459] [ENSRNOT00000080846]
A_42_P783414	0.03188732	up	1.9223006	1.9223006	0.9428339		SEC14-like lipid binding 4 [Source:RGD Symbol;Acc:1565810] [ENSRNOT00000087383]
A_44_P246409	0.01786905	down	1.9222077	-1.9222077	-0.9427642		BF549332 UI-R-A0-aq-g-10-0-UI.r1 UI-R-A0 Rattus norvegicus cDNA clone UI-R-A0-aq-g-10-0-UI 5', mRNA sequence [BF549332]
A_44_P1130832	0.015725134	up	1.9219317	1.9219317	0.9425571
A_44_P515754	0.017812671	up	1.9217176	1.9217176	0.94239634	Defb50	AGENCOURT_49984713 NCI_CGAP_Pr50 Rattus norvegicus cDNA clone IMAGE:7939010 5', mRNA sequence [DN937865]
A_44_P1089731	0.019417625	up	1.9209414	1.9209414	0.94181347	Pnma3	Rattus norvegicus paraneoplastic Ma antigen 3 (Pnma3), mRNA [NM_001106342]
A_44_P113933	0.011407862	down	1.920835	-1.920835	-0.9417336	Tyms	Rattus norvegicus thymidylate synthetase (Tyms), mRNA [NM_019179]
A_44_P1144625	0.009257851	down	1.9204433	-1.9204433	-0.94143933	LOC100912416	PREDICTED: Rattus norvegicus protein FAM115C-like (LOC100912416), transcript variant X2, mRNA [XM_017602785]
A_42_P629457	0.013763104	up	1.9201589	1.9201589	0.94122565		UI-R-E1-ft-e-01-0-UI.s1 UI-R-E1 Rattus norvegicus cDNA clone UI-R-E1-ft-e-01-0-UI 3', mRNA sequence [AA957193]
A_64_P067654	0.01234668	up	1.91964	1.91964	0.9408357	Aldh3a1	Rattus norvegicus aldehyde dehydrogenase 3 family, member A1 (Aldh3a1), mRNA [NM_031972]
A_44_P172814	0.044555303	down	1.919382	-1.919382	-0.9406418	Tubb5	Rattus norvegicus tubulin, beta 5 class I (Tubb5), mRNA [NM_173102]
A_44_P1097339	0.009400141	down	1.919206	-1.919206	-0.94050956	Phf11	Rattus norvegicus PHD finger protein 11 (Phf11), mRNA [NM_001024272]
A_44_P374638	0.016951233	down	1.9188175	-1.9188175	-0.9402175	Hsd17b2	Rattus norvegicus hydroxysteroid (17-beta) dehydrogenase 2 (Hsd17b2), mRNA [NM_024391]
A_44_P637763	0.0085755605	up	1.9186355	1.9186355	0.94008064	Gxylt1	Rattus norvegicus glucoside xylosyltransferase 1 (Gxylt1), mRNA [NM_001100887]
A_44_P684180	0.021101622	up	1.9184203	1.9184203	0.9399188	Lrrn1	Rattus norvegicus leucine rich repeat neuronal 1 (Lrrn1), mRNA [NM_001037363]
[truncated: 1,430 more rows]

## Sheet: AuNPs Kidney
ProbeName	p value	Regulation	FC (abs)	FC	Log FC	GeneSymbol	Description
A_44_P1017367	0.035312198	up	375.413	375.413	8.552335	Alb	Rattus norvegicus albumin (Alb), mRNA [NM_134326]
A_43_P12402	0.023020238	up	293.7996	293.7996	8.1986885	Slc27a5	Rattus norvegicus solute carrier family 27 member 5 (Slc27a5), mRNA [NM_024143]
A_44_P1143828	0.032248642	down	51.041042	-51.041042	-5.673586	LOC102553583	PREDICTED: Rattus norvegicus uncharacterized LOC102553583 (LOC102553583), transcript variant X3, ncRNA [XR_591412]
A_44_P128147	0.047433913	up	40.925686	40.925686	5.3549347	Tf	Rattus norvegicus transferrin (Tf), mRNA [NM_001013110]
A_44_P473510	0.0018372705	up	35.245533	35.245533	5.1393685	Vsig4	Rattus norvegicus V-set and immunoglobulin domain containing 4 (Vsig4), mRNA [NM_001025004]
A_64_P132721	0.023823071	down	24.830095	-24.830095	-4.634018	Oacyl	Rattus norvegicus O-acyltransferase like (Oacyl), mRNA [NM_001106139]
A_64_P058087	0.02695264	up	24.445684	24.445684	4.611508	Rbp4	Rattus norvegicus retinol binding protein 4 (Rbp4), mRNA [NM_013162]
A_64_P157371	0.037195504	down	17.751793	-17.751793	-4.149893	Pdpn	Rattus norvegicus podoplanin (Pdpn), mRNA [NM_019358]
A_44_P947608	0.012827452	up	17.467604	17.467604	4.12661	Corin	PREDICTED: Rattus norvegicus corin, serine peptidase (Corin), transcript variant X1, mRNA [XM_008770139]
A_64_P072103	0.021291586	down	16.001825	-16.001825	-4.0001645	Hmx2	Rattus norvegicus H6 family homeobox 2 (Hmx2), mRNA [NM_001106303]
A_43_P10453	0.0013874134	down	15.862302	-15.862302	-3.9875302	LOC102555781	PREDICTED: Rattus norvegicus uncharacterized LOC102555781 (LOC102555781), ncRNA [XR_343657]
A_44_P1162905	0.014704046	up	15.765538	15.765538	3.9787025	LOC684797	PREDICTED: Rattus norvegicus similar to Histone H2B 291B (LOC684797), transcript variant X1, mRNA [XM_008771680]
A_44_P741233	0.02498969	up	15.239967	15.239967	3.9297879		UI-R-C0-hl-d-12-0-UI.s1 UI-R-C0 Rattus norvegicus cDNA clone UI-R-C0-hl-d-12-0-UI 3', mRNA sequence [AA997376]
A_44_P236255	0.028152496	down	14.989323	-14.989323	-3.9058633	Calb1	Rattus norvegicus calbindin 1 (Calb1), mRNA [NM_031984]
A_64_P119836	8.2045683E-4	up	14.465425	14.465425	3.8545368	Shisa3	Rattus norvegicus shisa family member 3 (Shisa3), mRNA [NM_001109087]
A_44_P538551	0.03012821	up	11.353703	11.353703	3.505091	Ceacam1	Rattus norvegicus carcinoembryonic antigen related cell adhesion molecule 1 (Ceacam1), transcript variant 4, mRNA [NM_031755]
A_64_P000930	0.03568436	down	11.05951	-11.05951	-3.4672155	Spta1	Rattus norvegicus spectrin, alpha, erythrocytic 1 (Spta1), mRNA [NM_001011908]
A_44_P1085859	0.045440756	up	10.818581	10.818581	3.4354393	Oas1a	Rattus norvegicus 2'-5' oligoadenylate synthetase 1A (Oas1a), mRNA [NM_138913]
A_44_P1045612	0.044182632	up	10.340329	10.340329	3.3702102	Fxyd3	Rattus norvegicus FXYD domain-containing ion transport regulator 3 (Fxyd3), mRNA [NM_172317]
A_44_P1139410	0.04688331	up	10.23358	10.23358	3.355239	LOC102553738	PREDICTED: Rattus norvegicus uncharacterized LOC102553738 (LOC102553738), ncRNA [XR_597182]
A_44_P1137218	0.019288063	down	9.938585	-9.938585	-3.3130405	LOC102550919	PREDICTED: Rattus norvegicus uncharacterized LOC102550919 (LOC102550919), transcript variant X2, ncRNA [XR_341219]
A_43_P10290	0.044801455	down	9.893394	-9.893394	-3.3064656	Tspan1	Rattus norvegicus tetraspanin 1 (Tspan1), mRNA [NM_001004236]
A_43_P23155	0.047879264	up	9.793115	9.793115	3.2917678	Mcm10	Rattus norvegicus minichromosome maintenance 10 replication initiation factor (Mcm10), mRNA [NM_001107366]
A_42_P454378	0.045470327	down	9.342304	-9.342304	-3.2237785	Slc26a4	Rattus norvegicus solute carrier family 26 member 4 (Slc26a4), mRNA [NM_019214]
A_42_P797218	0.039363682	up	9.018183	9.018183	3.1728368	Gpt	Rattus norvegicus glutamic--pyruvic transaminase (Gpt), mRNA [NM_031039]
A_44_P1114405	0.012959867	down	8.850327	-8.850327	-3.1457307	RGD1564999	PREDICTED: Rattus norvegicus similar to isopentenyl-diphosphate delta isomerase 2 (RGD1564999), transcript variant X1, mRNA [XM_001072335]
A_44_P1144359	0.00272434	up	8.796267	8.796267	3.1368914	LOC102550673	PREDICTED: Rattus norvegicus uncharacterized LOC102550673 (LOC102550673), transcript variant X1, ncRNA [XR_001837409]
A_64_P398458	0.018313324	up	8.598765	8.598765	3.1041296	Wscd2	Rattus norvegicus WSC domain containing 2 (Wscd2), mRNA [NM_001271178]
A_44_P114320	0.04821124	down	8.55154	-8.55154	-3.0961843	Atp6v1g3	Rattus norvegicus ATPase H+ transporting V1 subunit G3 (Atp6v1g3), mRNA [NM_001105991]
A_43_P11975	0.04259934	down	8.35549	-8.35549	-3.0627244	Tsx	Rattus norvegicus testis specific X-linked gene (Tsx), mRNA [NM_019203]
A_44_P1096694	0.04733513	up	8.193635	8.193635	3.0345037		paired immunoglobulin-like type 2 receptor alpha-like [Source:RGD Symbol;Acc:6497409] [ENSRNOT00000039797]
A_64_P105202	0.030413926	up	7.826517	7.826517	2.9683704	Slc29a4	Rattus norvegicus solute carrier family 29 member 4 (Slc29a4), mRNA [NM_001105911]
A_44_P1142654	0.0061686877	up	7.5417476	7.5417476	2.9148989		Q5DBE9_SCHJA (Q5DBE9) SJCHGC01974 protein, partial (13%) [TC635577]
A_44_P1140085	0.021198966	up	7.42924	7.42924	2.8932147	LOC102557557	PREDICTED: Rattus norvegicus uncharacterized LOC102557557 (LOC102557557), transcript variant X2, ncRNA [XR_001834786]
A_64_P001211	0.03784704	up	7.401645	7.401645	2.887846	Cyp2d5	Rattus norvegicus cytochrome P450, family 2, subfamily d, polypeptide 5 (Cyp2d5), mRNA [NM_173304]
A_43_P12924	0.025154736	up	7.294405	7.294405	2.8667903	Abcg5	Rattus norvegicus ATP binding cassette subfamily G member 5 (Abcg5), mRNA [NM_053754]
A_44_P1114700	0.0453994	down	7.209854	-7.209854	-2.84997	Slc4a9	Rattus norvegicus solute carrier family 4 member 9 (Slc4a9), mRNA [NM_152938]
A_43_P13753	0.03529194	up	7.1637273	7.1637273	2.8407104	LOC102555870	PREDICTED: Rattus norvegicus uncharacterized LOC102555870 (LOC102555870), transcript variant X2, ncRNA [XR_001834221]
A_64_P100318	0.031810354	up	7.1231894	7.1231894	2.8325233	Marc1	Rattus norvegicus mitochondrial amidoxime reducing component 1 (Marc1), mRNA [NM_001100811]
A_44_P990376	0.037649848	up	6.9934855	6.9934855	2.8060117	Gpnmb	Rattus norvegicus glycoprotein nmb (Gpnmb), mRNA [NM_133298]
A_42_P813567	0.0066323667	down	6.9093747	-6.9093747	-2.7885551	Scd2	Rattus norvegicus stearoyl-Coenzyme A desaturase 2 (Scd2), mRNA [NM_031841]
A_64_P019790	0.046098743	up	6.8920107	6.8920107	2.784925	Cyp2d1	Rattus norvegicus cytochrome P450, family 2, subfamily d, polypeptide 1 (Cyp2d1), mRNA [NM_153313]
A_44_P1105275	0.00888512	up	6.784203	6.784203	2.7621794
A_44_P1082613	0.004240697	up	6.5941563	6.5941563	2.721188	Trpm2	Rattus norvegicus transient receptor potential cation channel, subfamily M, member 2 (Trpm2), mRNA [NM_001011559]
A_64_P104553	0.018457033	up	6.5862427	6.5862427	2.7194557	Itpka	Rattus norvegicus inositol-trisphosphate 3-kinase A (Itpka), mRNA [NM_031045]
A_44_P238424	0.023290545	up	6.568369	6.568369	2.7155352	Akap5	Rattus norvegicus A-kinase anchoring protein 5 (Akap5), mRNA [NM_133515]
A_44_P1097053	0.007805144	up	6.4632297	6.4632297	2.6922553	LOC100911949	PREDICTED: Rattus norvegicus uncharacterized LOC100911949 (LOC100911949), mRNA [XM_003751342]
A_44_P1106857	0.018503346	up	6.4473133	6.4473133	2.688698	Tmem63c	transmembrane protein 63c [Source:RGD Symbol;Acc:1310207] [ENSRNOT00000089644]
A_44_P1145464	0.006519456	up	6.440139	6.440139	2.6870918	LOC102548121	PREDICTED: Rattus norvegicus uncharacterized LOC102548121 (LOC102548121), ncRNA [XR_592857]
A_44_P1109849	0.020183522	down	6.1799755	-6.1799755	-2.6276011
A_44_P1134116	0.009891917	down	6.1698446	-6.1698446	-2.6252341	LOC102550495	PREDICTED: Rattus norvegicus uncharacterized LOC102550495 (LOC102550495), ncRNA [XR_339788]
A_44_P1359715	0.046039663	down	6.086392	-6.086392	-2.6055872	LOC102551003	keratin-associated protein 20-2-like [Source:RGD Symbol;Acc:7637203] [ENSRNOT00000078323]
A_44_P197786	0.028605571	down	6.0358076	-6.0358076	-2.5935469		UI-R-BS0-aod-a-10-0-UI.s1 UI-R-BS0 Rattus norvegicus cDNA clone UI-R-BS0-aod-a-10-0-UI 3', mRNA sequence [AW535705]
A_43_P22546	0.025487572	down	6.0155296	-6.0155296	-2.5886917	Mrln	EST348178 Rat gene index, normalized rat, norvegicus, Bento Soares Rattus norvegicus cDNA clone RGIDW10 5' end, mRNA sequence [AW916770]
A_44_P1130414	0.013465255	down	5.9849963	-5.9849963	-2.5813503	LOC102554996	PREDICTED: Rattus norvegicus uncharacterized LOC102554996 (LOC102554996), ncRNA [XR_349003]
A_64_P157059	0.032518834	up	5.953874	5.953874	2.5738287	Usp18	Rattus norvegicus ubiquitin specific peptidase 18 (Usp18), mRNA [NM_001014058]
A_44_P250983	0.039959904	up	5.910694	5.910694	2.5633276	Nrbp2	Rattus norvegicus nuclear receptor binding protein 2 (Nrbp2), mRNA [NM_001135007]
A_44_P1136333	0.008450979	up	5.860532	5.860532	2.5510316
A_44_P1366378	0.03952156	up	5.853589	5.853589	2.5493214	Ms4a6bl	Rattus norvegicus membrane-spanning 4-domains, subfamily A, member 6B-like (Ms4a6bl), mRNA [NM_001006975]
A_64_P054461	0.005124072	up	5.842884	5.842884	2.5466807	Bhlha9	basic helix-loop-helix family, member a9 [Source:RGD Symbol;Acc:1311234] [ENSRNOT00000032934]
A_44_P287301	0.006047072	down	5.83766	-5.83766	-2.5453901	Bcl6	Rattus norvegicus B-cell CLL/lymphoma 6 (Bcl6), mRNA [NM_001107084]
A_64_P157224	0.008835816	up	5.834795	5.834795	2.544682	Zfp324	zinc finger protein 324 [Source:RGD Symbol;Acc:1306631] [ENSRNOT00000036874]
A_44_P1132385	0.008824097	up	5.82424	5.82424	2.54207	LOC103695196	PREDICTED: Rattus norvegicus uncharacterized LOC103695196 (LOC103695196), ncRNA [XR_600571]
A_64_P005193	0.040199798	up	5.7552533	5.7552533	2.5248795	Krt81	Rattus norvegicus keratin 81 (Krt81), mRNA [NM_001008814]
A_64_P112889	0.029890282	up	5.6415043	5.6415043	2.49608	Ccdc152	Rattus norvegicus coiled-coil domain containing 152 (Ccdc152), mRNA [NM_001191959]
A_44_P1155122	0.04113309	up	5.638371	5.638371	2.4952784		leptin receptor [Source:RGD Symbol;Acc:3001] [ENSRNOT00000050597]
A_44_P1094060	0.029124128	up	5.610742	5.610742	2.4881916	Atxn7l1	PREDICTED: Rattus norvegicus ataxin 7-like 1 (Atxn7l1), transcript variant X2, mRNA [XM_008764632]
A_43_P21191	0.005273052	up	5.5865993	5.5865993	2.4819703		BTB domain containing 11 [Source:RGD Symbol;Acc:1308647] [ENSRNOT00000044331]
A_44_P987213	0.02313551	down	5.583804	-5.583804	-2.4812484		UI-R-FS0-cqs-j-23-0-UI.s1 UI-R-FS0 Rattus norvegicus cDNA clone UI-R-FS0-cqs-j-23-0-UI 3', mRNA sequence [CA509818]
A_44_P603477	0.024256427	up	5.5638757	5.5638757	2.4760902	Pla2r1	Rattus norvegicus phospholipase A2 receptor 1 (Pla2r1), mRNA [NM_001100837]
A_43_P14648	0.004343536	up	5.5523243	5.5523243	2.4730918	Art3	Rattus norvegicus ADP-ribosyltransferase 3 (Art3), mRNA [NM_001012034]
A_44_P103411	0.04264257	up	5.5464816	5.5464816	2.4715729		UI-R-CN1-cjn-h-03-0-UI.s1 UI-R-CN1 Rattus norvegicus cDNA clone UI-R-CN1-cjn-h-03-0-UI 3', mRNA sequence [BM389465]
A_44_P966220	0.034868892	up	5.348159	5.348159	2.4190423	Adamts12	Rattus norvegicus ADAM metallopeptidase with thrombospondin type 1 motif, 12 (Adamts12), mRNA [NM_001106420]
A_64_P122489	0.04119938	up	5.311336	5.311336	2.4090748	Hdc	Rattus norvegicus histidine decarboxylase (Hdc), mRNA [NM_017016]
A_44_P1056949	0.049365982	down	5.204584	-5.204584	-2.379783	Timp4	Rattus norvegicus tissue inhibitor of metalloproteinase 4 (Timp4), mRNA [NM_001109393]
A_44_P175299	0.025600389	up	5.1753654	5.1753654	2.3716607
A_44_P1101968	0.044275276	down	5.1686907	-5.1686907	-2.369799	Neurl1	neuralized E3 ubiquitin protein ligase 1 [Source:RGD Symbol;Acc:1307021] [ENSRNOT00000076452]
A_44_P318323	0.024389623	down	5.1228275	-5.1228275	-2.3569403	Ugt2b7	Rattus norvegicus UDP glucuronosyltransferase family 2 member B7 (Ugt2b7), mRNA [NM_173323]
A_64_P096412	0.014600213	up	5.0970073	5.0970073	2.3496504	Krt23	Rattus norvegicus keratin 23 (Krt23), mRNA [NM_001008753]
A_44_P1126986	0.034935977	up	5.068638	5.068638	2.341598	LOC102555894	PREDICTED: Rattus norvegicus uncharacterized LOC102555894 (LOC102555894), ncRNA [XR_347337]
A_43_P15529	0.036154237	down	5.066164	-5.066164	-2.3408937	Ptgds	Rattus norvegicus prostaglandin D2 synthase (Ptgds), mRNA [NM_013015]
A_44_P1122064	0.021802766	up	5.030235	5.030235	2.3306258	LOC102548277	PREDICTED: Rattus norvegicus uncharacterized LOC102548277 (LOC102548277), ncRNA [XR_001842976]
A_44_P1103440	0.0485993	up	4.9675217	4.9675217	2.3125262	Kynu	PREDICTED: Rattus norvegicus kynureninase (Kynu), transcript variant X2, mRNA [XM_008761695]
A_44_P1155950	0.031426936	up	4.947682	4.947682	2.3067527		Rattus norvegicus similar to immunoglobulin heavy chain variable region (LOC366745), mRNA [XM_345733]
A_43_P13023	0.041624278	up	4.9005265	4.9005265	2.2929368	Neu3	Rattus norvegicus neuraminidase 3 (Neu3), mRNA [NM_054010]
A_44_P1152129	0.036666576	up	4.79184	4.79184	2.2605798		signal-regulatory protein alpha-like [Source:RGD Symbol;Acc:2321882] [ENSRNOT00000071638]
A_42_P544898	0.010588326	up	4.789237	4.789237	2.259796	Bcl6b	Rattus norvegicus B-cell CLL/lymphoma 6B (Bcl6b), mRNA [NM_001108279]
A_44_P231655	0.011476117	up	4.7085376	4.7085376	2.235279	Glt1d1	glycosyltransferase 1 domain containing 1 [Source:RGD Symbol;Acc:1304896] [ENSRNOT00000064526]
A_43_P13543	0.009988462	up	4.686127	4.686127	2.2283962		AMGNNUC:NRDG1-00086-C10-A nrdg1 (10855) Rattus norvegicus cDNA clone nrdg1-00086-c10 5', mRNA sequence [CB547815]
A_44_P1158819	0.036297336	up	4.6545134	4.6545134	2.2186303
A_44_P1156356	0.02947601	up	4.6318073	4.6318073	2.2115753	Shank3	Rattus norvegicus SH3 and multiple ankyrin repeat domains 3 (Shank3), mRNA [NM_021676]
A_44_P1135907	0.010426368	up	4.619931	4.619931	2.2078714	LOC103693594	PREDICTED: Rattus norvegicus uncharacterized LOC103693594 (LOC103693594), ncRNA [XR_595150]
A_64_P109272	0.02638822	up	4.612515	4.612515	2.2055535	Olr80	Rattus norvegicus olfactory receptor 80 (Olr80), mRNA [NM_001001270]
A_64_P098053	0.02800319	up	4.601599	4.601599	2.2021353	Tm4sf19	Rattus norvegicus transmembrane 4 L six family member 19 (Tm4sf19), mRNA [NM_001105873]
A_44_P1101715	0.01035377	up	4.588158	4.588158	2.197915
A_44_P714262	0.019654695	up	4.568335	4.568335	2.1916685
A_64_P022620	0.0072014914	down	4.5659275	-4.5659275	-2.190908	LOC100911353	PREDICTED: Rattus norvegicus uncharacterized LOC100911353 (LOC100911353), mRNA [XM_008759427]
A_44_P1134201	0.046558984	up	4.5654674	4.5654674	2.1907625	LOC102552207	PREDICTED: Rattus norvegicus uncharacterized LOC102552207 (LOC102552207), ncRNA [XR_339828]
A_44_P1034209	0.04582834	up	4.5623403	4.5623403	2.189774	Lamb3	Rattus norvegicus laminin subunit beta 3 (Lamb3), mRNA [NM_001100841]
A_44_P511346	0.019547535	up	4.5492053	4.5492053	2.1856146	Xrcc3	X-ray repair cross complementing 3 [Source:RGD Symbol;Acc:1306849] [ENSRNOT00000016208]
A_43_P15271	0.041069403	up	4.5305104	4.5305104	2.1796737	Ahcy	Rattus norvegicus adenosylhomocysteinase (Ahcy), mRNA [NM_017201]
A_44_P1362433	0.016150534	up	4.478098	4.478098	2.1628861	Naif1	nuclear apoptosis inducing factor 1 [Source:RGD Symbol;Acc:1597546] [ENSRNOT00000072241]
A_44_P1086764	0.04516444	down	4.4571567	-4.4571567	-2.1561236	Tuft1	Rattus norvegicus tuftelin 1 (Tuft1), mRNA [NM_001108948]
A_44_P1161650	0.013234792	down	4.4448404	-4.4448404	-2.1521316	LOC100911353	PREDICTED: Rattus norvegicus uncharacterized LOC100911353 (LOC100911353), mRNA [XM_008759427]
A_44_P1366813	0.01669291	up	4.434123	4.434123	2.1486487
A_44_P1059903	0.043308828	up	4.4162693	4.4162693	2.1428282	Lzts1	Rattus norvegicus leucine zipper tumor suppressor 1 (Lzts1), mRNA [NM_153470]
A_44_P1159716	0.031129152	up	4.3986464	4.3986464	2.1370597
A_44_P1080335	0.010451352	up	4.390123	4.390123	2.1342614	Olr204	Rattus norvegicus olfactory receptor 204 (Olr204), mRNA [NM_001000192]
A_44_P1104678	0.024089618	up	4.385928	4.385928	2.132882	Ssbp1	PREDICTED: Rattus norvegicus single stranded DNA binding protein 1 (Ssbp1), transcript variant X1, mRNA [XM_008762822]
A_44_P1362683	0.011271296	up	4.385431	4.385431	2.1327186
A_44_P1128410	0.02201089	up	4.384325	4.384325	2.1323547	LOC103692925	PREDICTED: Rattus norvegicus uncharacterized LOC103692925 (LOC103692925), ncRNA [XR_593552]
A_42_P596458	0.019032013	up	4.3696923	4.3696923	2.1275318	Slc6a12	Rattus norvegicus solute carrier family 6 member 12 (Slc6a12), mRNA [NM_017335]
A_64_P147106	0.04009904	up	4.368661	4.368661	2.127191	B3gnt6	Rattus norvegicus UDP-GlcNAc:betaGal beta-1,3-N-acetylglucosaminyltransferase 6 (B3gnt6), mRNA [NM_001106211]
A_44_P1105463	0.011594945	up	4.348885	4.348885	2.1206455	Tmem68	PREDICTED: Rattus norvegicus transmembrane protein 68 (Tmem68), transcript variant X1, mRNA [XM_008763539]
A_44_P1361963	0.0339195	up	4.3306546	4.3306546	2.1145852		interleukin 15 receptor subunit alpha [Source:RGD Symbol;Acc:1305149] [ENSRNOT00000025252]
A_64_P105107	0.013802627	up	4.3101697	4.3101697	2.1077447	Lonrf1	LON peptidase N-terminal domain and ring finger 1 [Source:RGD Symbol;Acc:1562583] [ENSRNOT00000083434]
A_64_P161483	0.023635548	up	4.3068247	4.3068247	2.1066246	Zfp398	Rattus norvegicus zinc finger protein 398 (Zfp398), mRNA [NM_001109230]
A_44_P1363820	0.0468952	up	4.298585	4.298585	2.1038618
A_42_P576953	0.046800327	up	4.2949953	4.2949953	2.1026566	Pla1a	Rattus norvegicus phospholipase A1 member A (Pla1a), mRNA [NM_138882]
A_44_P1362724	0.011970161	up	4.283548	4.283548	2.0988061		immunoglobulin kappa chain variable 8-27 [Source:MGI Symbol;Acc:MGI:4439868] [ENSRNOT00000043097]
A_44_P609412	0.012605611	up	4.2396646	4.2396646	2.08395	LOC102553866	zinc finger protein 764-like [Source:RGD Symbol;Acc:7540019] [ENSRNOT00000052100]
A_64_P036285	0.011657471	down	4.2163405	-4.2163405	-2.0759914	Scgb1c1	Rattus norvegicus secretoglobin, family 1C, member 1 (Scgb1c1), mRNA [NM_001107561]
A_44_P1131794	0.019495718	up	4.2039084	4.2039084	2.0717313	LOC103693392	PREDICTED: Rattus norvegicus uncharacterized LOC103693392 (LOC103693392), ncRNA [XR_594817]
A_42_P571583	0.0109621715	up	4.1993275	4.1993275	2.0701582	Chst12	Rattus norvegicus carbohydrate sulfotransferase 12 (Chst12), mRNA [NM_001037775]
A_44_P1105852	0.025708625	up	4.186026	4.186026	2.0655813	Dab1	DAB1, reelin adaptor protein [Source:RGD Symbol;Acc:628770] [ENSRNOT00000082021]
A_44_P1164536	0.013605675	up	4.1830864	4.1830864	2.0645678	Nrg1
A_44_P1154801	0.010635426	up	4.1761093	4.1761093	2.0621595	Six6os1	Six6 opposite strand transcript 1 [Source:RGD Symbol;Acc:1559456] [ENSRNOT00000041409]
A_44_P474483	0.04712754	down	4.1567264	-4.1567264	-2.0554478		UI-R-BX0-ark-d-08-0-UI.s1 UI-R-BX0 Rattus norvegicus cDNA clone UI-R-BX0-ark-d-08-0-UI 3', mRNA sequence [BE104073]
A_44_P845503	0.048912287	up	4.1330194	4.1330194	2.0471961	Ldlrad1	low density lipoprotein receptor class A domain containing 1 [Source:RGD Symbol;Acc:1597398] [ENSRNOT00000057372]
A_44_P219322	0.033147294	up	4.120401	4.120401	2.0427847		UI-R-BO1-ajs-b-04-0-UI.s1 UI-R-BO1 Rattus norvegicus cDNA clone UI-R-BO1-ajs-b-04-0-UI 3', mRNA sequence [AW527243]
A_44_P480424	0.04784348	down	4.1178093	-4.1178093	-2.041877	Tigd3	Rattus norvegicus tigger transposable element derived 3 (Tigd3), mRNA [NM_001107573]
A_44_P1161646	0.010523092	down	4.109641	-4.109641	-2.0390124
A_42_P565294	0.0120048905	up	4.089194	4.089194	2.0318165	Rffl	ring finger and FYVE-like domain containing E3 ubiquitin protein ligase [Source:RGD Symbol;Acc:727916] [ENSRNOT00000076398]
A_44_P1130402	0.011623881	up	4.077978	4.077978	2.027854
A_44_P344096	0.03819814	up	4.0698557	4.0698557	2.0249777	Ehd3	Rattus norvegicus EH-domain containing 3 (Ehd3), mRNA [NM_138890]
A_44_P1140406	0.011837121	up	4.0635114	4.0635114	2.022727	LOC102546853	PREDICTED: Rattus norvegicus uncharacterized LOC102546853 (LOC102546853), ncRNA [XR_343926]
A_44_P1083732	0.010389204	up	4.044157	4.044157	2.015839	Csgalnact1	Rattus norvegicus chondroitin sulfate N-acetylgalactosaminyltransferase 1 (Csgalnact1), mRNA [NM_001107309]
A_64_P097847	0.03447427	up	4.0416846	4.0416846	2.0149567	RGD1309104	Rattus norvegicus similar to RIKEN cDNA 1700025G04 gene (RGD1309104), mRNA [NM_001105959]
A_44_P1087173	0.035679143	down	4.039276	-4.039276	-2.0140967	P4ha1	Rattus norvegicus prolyl 4-hydroxylase subunit alpha 1 (P4ha1), mRNA [NM_172062]
A_44_P417729	0.010604523	up	4.03763	4.03763	2.0135088		UI-R-E0-dn-e-05-0-UI.s1 UI-R-E0 Rattus norvegicus cDNA clone UI-R-E0-dn-e-05-0-UI 3', mRNA sequence [AA900765]
A_44_P1362654	0.021391666	up	4.0030117	4.0030117	2.0010858	Colca2	colorectal cancer associated 2 [Source:RGD Symbol;Acc:1563866] [ENSRNOT00000065744]
A_44_P1138120	0.019873133	down	3.9969802	-3.9969802	-1.9989104	LOC102552678	PREDICTED: Rattus norvegicus uncharacterized LOC102552678 (LOC102552678), ncRNA [XR_596824]
A_64_P061850	0.01477412	up	3.9910715	3.9910715	1.9967761		PREDICTED: Rattus norvegicus cleavage and polyadenylation specific factor 4-like (Cpsf4l), mRNA [XM_008768407]
A_44_P555580	0.021716775	up	3.989338	3.989338	1.9961493	Ttll9	Rattus norvegicus tubulin tyrosine ligase like 9 (Ttll9), mRNA [NM_001014051]
A_44_P1360771	0.03100151	up	3.9886842	3.9886842	1.9959129
A_44_P1096944	0.04102178	up	3.981995	3.981995	1.9934914	Dnah14	PREDICTED: Rattus norvegicus similar to Dynein heavy chain at 16F CG7092-PA (LOC690288), transcript variant X3, mRNA [XM_017604663]
A_44_P262199	0.012613614	up	3.979099	3.979099	1.9924418	Olr1581	Rattus norvegicus olfactory receptor 1581 (Olr1581), mRNA [NM_001000533]
A_43_P15574	0.033872362	down	3.9665797	-3.9665797	-1.9878955	Dpp7	Rattus norvegicus dipeptidylpeptidase 7 (Dpp7), mRNA [NM_031973]
A_44_P466614	0.01098096	down	3.9606595	-3.9606595	-1.9857407	Lactb2	Rattus norvegicus lactamase, beta 2 (Lactb2), mRNA [NM_001024247]
A_44_P1132041	0.010843477	up	3.9527142	3.9527142	1.9828436
A_44_P1121653	0.03604574	up	3.9474828	3.9474828	1.980933	LOC102550017	PREDICTED: Rattus norvegicus uncharacterized LOC102550017 (LOC102550017), transcript variant X1, ncRNA [XR_001837076]
A_44_P1162140	0.031574678	up	3.9368055	3.9368055	1.9770254	Zfp37	PREDICTED: Rattus norvegicus zinc finger protein 37 (Zfp37), transcript variant X1, mRNA [XM_008763803]
A_64_P105389	0.017243052	up	3.9293835	3.9293835	1.974303	Krt4	Rattus norvegicus keratin 4 (Krt4), mRNA [NM_001008806]
A_64_P363385	0.04858581	up	3.9116461	3.9116461	1.9677758	Ugt1a9	Rattus norvegicus UDP glucuronosyltransferase family 1 member A9 (Ugt1a9), mRNA [NM_201425]
A_44_P532557	0.034870036	down	3.8760533	-3.8760533	-1.9545884	Map3k7cl	Rattus norvegicus MAP3K7 C-terminal like (Map3k7cl), mRNA [NM_001013979]
A_64_P390639	0.015099968	up	3.8681304	3.8681304	1.9516364		GB
A_44_P1130986	0.038590454	up	3.8614838	3.8614838	1.9491553	LOC103690585	PREDICTED: Rattus norvegicus uncharacterized LOC103690585 (LOC103690585), transcript variant X1, ncRNA [XR_001839923]
A_44_P238421	0.026543468	down	3.8557384	-3.8557384	-1.9470072	Col1a1	Rattus norvegicus collagen type I alpha 1 chain (Col1a1), mRNA [NM_053304]
A_44_P1081084	0.040557735	up	3.8234396	3.8234396	1.9348711	Xkr4	Rattus norvegicus XK related 4 (Xkr4), mRNA [NM_001011971]
A_44_P1145288	0.013794536	up	3.8175318	3.8175318	1.9326402		Q57F28_BRUAB (Q57F28) Fpr, ferredoxin--NADP reductase , partial (5%) [TC634691]
A_64_P296046	0.037217934	down	3.8148978	-3.8148978	-1.9316443	Rhoc	Rattus norvegicus ras homolog family member C (Rhoc), mRNA [NM_001106461]
A_43_P21638	0.024658414	up	3.8148658	3.8148658	1.9316323	Helz2	Rattus norvegicus helicase with zinc finger 2, transcriptional coactivator (Helz2), mRNA [NM_001305276]
A_44_P348435	0.047062546	down	3.80638	-3.80638	-1.9284196		RVL16696 Wackym-Soares normalized rat vestibular cDNA library Rattus norvegicus cDNA 5', mRNA sequence [DV724625]
A_44_P592273	0.04233487	up	3.8029037	3.8029037	1.9271014	Glt1d1	glycosyltransferase 1 domain containing 1 [Source:RGD Symbol;Acc:1304896] [ENSRNOT00000064526]
A_44_P1150406	0.046304084	up	3.790769	3.790769	1.9224906
A_44_P1124698	0.04991839	down	3.7750645	-3.7750645	-1.9165013	LOC102553594	PREDICTED: Rattus norvegicus uncharacterized LOC102553594 (LOC102553594), transcript variant X2, ncRNA [XR_600886]
A_64_P153301	0.02367684	down	3.772946	-3.772946	-1.9156914	Ccdc160	coiled-coil domain containing 160 [Source:RGD Symbol;Acc:1597791] [ENSRNOT00000071222]
A_44_P1098385	0.014449077	up	3.7658606	3.7658606	1.9129796	LOC103694963	PREDICTED: Rattus norvegicus uncharacterized LOC103694963 (LOC103694963), mRNA [XM_017587807]
A_64_P044762	0.024575856	up	3.7264788	3.7264788	1.8978131	Srms	Rattus norvegicus src-related kinase lacking C-terminal regulatory tyrosine and N-terminal myristylation sites (Srms), mRNA [NM_001011961]
A_64_P040038	0.048063442	down	3.7129104	-3.7129104	-1.8925505	Gtpbp4	Rattus norvegicus GTP binding protein 4 (Gtpbp4), mRNA [NM_053689]
A_44_P1366271	0.046057556	up	3.7102427	3.7102427	1.8915136	Dmbt1	Rattus norvegicus deleted in malignant brain tumors 1 (Dmbt1), mRNA [NM_022849]
A_64_P132784	0.046707146	up	3.7091012	3.7091012	1.8910697	Hacd2	PREDICTED: Rattus norvegicus 3-hydroxyacyl-CoA dehydratase 2 (Hacd2), mRNA [XM_006248438]
A_44_P1111166	0.025160382	down	3.687849	-3.687849	-1.8827796	Gper1	PREDICTED: Rattus norvegicus G protein-coupled estrogen receptor 1 (Gper1), transcript variant X1, mRNA [XM_006248914]
A_44_P1116165	0.015769575	up	3.6773596	3.6773596	1.8786702	Hdac8	PREDICTED: Rattus norvegicus histone deacetylase 8 (Hdac8), transcript variant X2, mRNA [XM_006257123]
A_44_P541397	0.023146724	up	3.670392	3.670392	1.8759341	Procr	Rattus norvegicus protein C receptor (Procr), mRNA [NM_001025733]
A_44_P1133750	0.020618336	up	3.6641839	3.6641839	1.8734919	LOC103691428	PREDICTED: Rattus norvegicus uncharacterized LOC103691428 (LOC103691428), ncRNA [XR_590833]
A_44_P335552	0.017203625	up	3.6583934	3.6583934	1.8712102	LOC102552920	armadillo repeat-containing X-linked protein 5-like [Source:RGD Symbol;Acc:7586448] [ENSRNOT00000004252]
A_44_P1142216	0.020226719	up	3.6439683	3.6439683	1.8655103	LOC102549530	PREDICTED: Rattus norvegicus uncharacterized LOC102549530 (LOC102549530), transcript variant X1, ncRNA [XR_590078]
A_44_P1153417	0.018908078	up	3.6411772	3.6411772	1.8644049
A_44_P138036	0.041473385	up	3.6337698	3.6337698	1.861467	Lrrc29	Rattus norvegicus leucine rich repeat containing 29 (Lrrc29), mRNA [NM_001195616]
A_44_P1039994	0.022847481	up	3.6265752	3.6265752	1.8586078	Irf7	Rattus norvegicus interferon regulatory factor 7 (Irf7), mRNA [NM_001033691]
A_44_P1138883	0.043809105	up	3.6191769	3.6191769	1.8556616	LOC102553013	PREDICTED: Rattus norvegicus uncharacterized LOC102553013 (LOC102553013), ncRNA [XR_361427]
A_64_P032585	0.03462315	up	3.6189282	3.6189282	1.8555624	Hist1h2an	Rattus norvegicus histone cluster 1, H2an (Hist1h2an), mRNA [NM_001107354]
A_64_P094541	0.032626588	up	3.6121962	3.6121962	1.8528762	Pkd1	Rattus norvegicus polycystin 1, transient receptor potential channel interacting (Pkd1), mRNA [NM_001257352]
A_44_P188275	0.017059084	up	3.6114132	3.6114132	1.8525635	Spag4	Rattus norvegicus sperm associated antigen 4 (Spag4), mRNA [NM_031792]
A_64_P155996	0.037944864	up	3.5968263	3.5968263	1.8467245	LOC684792	PREDICTED: Rattus norvegicus hypothetical protein LOC684792 (LOC684792), mRNA [XM_001071963]
A_64_P157446	0.014639275	up	3.5738072	3.5738072	1.8374618	Adgrg5	Rattus norvegicus adhesion G protein-coupled receptor G5 (Adgrg5), mRNA [NM_001107410]
A_44_P178252	0.034553487	down	3.5729146	-3.5729146	-1.8371015	Ccl21	Rattus norvegicus C-C motif chemokine ligand 21 (Ccl21), mRNA [NM_001008513]
A_43_P23118	0.034762163	down	3.5690787	-3.5690787	-1.8355517	Igfbpl1	Rattus norvegicus insulin-like growth factor binding protein-like 1 (Igfbpl1), mRNA [NM_001108972]
A_44_P1086215	0.021223338	up	3.5501606	3.5501606	1.8278843	Dab1	Rattus norvegicus DAB1, reelin adaptor protein (Dab1), mRNA [NM_153621]
A_64_P056698	0.019173231	up	3.541222	3.541222	1.8242474	Pom121l2	Rattus norvegicus POM121 transmembrane nucleoporin-like 2 (Pom121l2), transcript variant 2, mRNA [NM_001162931]
A_64_P100768	0.0240652	up	3.52493	3.52493	1.8175945	Cnnm4	Rattus norvegicus cyclin and CBS domain divalent metal cation transport mediator 4 (Cnnm4), mRNA [NM_001271050]
A_44_P180717	0.0467693	up	3.5202675	3.5202675	1.815685	Pstpip1	Rattus norvegicus proline-serine-threonine phosphatase-interacting protein 1 (Pstpip1), mRNA [NM_001106824]
A_44_P1089231	0.04973039	down	3.4959917	-3.4959917	-1.8057017	Slc25a45	Rattus norvegicus solute carrier family 25, member 45 (Slc25a45), mRNA [NM_001271179]
A_44_P746666	0.022334022	up	3.4855032	3.4855032	1.8013669	Zfp667	Rattus norvegicus zinc finger protein 667 (Zfp667), mRNA [NM_001008557]
A_64_P009658	0.019803293	up	3.4766831	3.4766831	1.7977116	LOC317356	PREDICTED: Rattus norvegicus similar to protocadherin alpha 13 (LOC317356), mRNA [XM_006256688]
A_44_P668278	0.015551131	up	3.4708974	3.4708974	1.7953087		AMGNNUC:NRHY4-00106-H9-A W Rat hypothalamus (10464) Rattus norvegicus cDNA clone nrhy4-00106-h9 5', mRNA sequence [CB725328]
A_44_P868139	0.015169862	up	3.4621153	3.4621153	1.7916538	LOC685747	hypothetical protein LOC685747 [Source:RGD Symbol;Acc:1590221] [ENSRNOT00000049256]
A_44_P1106307	0.040842663	down	3.459843	-3.459843	-1.7907065	Klhdc7a	PREDICTED: Rattus norvegicus kelch domain containing 7A (Klhdc7a), transcript variant X1, mRNA [XM_006239296]
A_44_P1097474	0.027914306	up	3.455486	3.455486	1.7888887	LOC108353765	PREDICTED: Rattus norvegicus uncharacterized LOC108353765 (LOC108353765), partial mRNA [XM_017604814]
A_44_P1123474	0.01991377	up	3.4235692	3.4235692	1.7755011	LOC102550643	PREDICTED: Rattus norvegicus uncharacterized LOC102550643 (LOC102550643), transcript variant X1, ncRNA [XR_592038]
A_44_P1162045	0.029710045	up	3.4140093	3.4140093	1.771467	Syndig1	PREDICTED: Rattus norvegicus synapse differentiation inducing 1 (Syndig1), transcript variant X7, mRNA [XM_017591918]
A_44_P1148238	0.020745162	up	3.408574	3.408574	1.7691684	LOC102550976	PREDICTED: Rattus norvegicus uncharacterized LOC102550976 (LOC102550976), transcript variant X2, ncRNA [XR_001840575]
A_43_P10259	0.025867078	up	3.4041405	3.4041405	1.7672906	Coro2a	PREDICTED: Rattus norvegicus coronin 2A (Coro2a), transcript variant X1, mRNA [XM_017593364]
A_44_P1366786	0.029623764	up	3.4005563	3.4005563	1.7657708	Krtap3-1	keratin associated protein 3-1 [Source:RGD Symbol;Acc:1596817] [ENSRNOT00000016752]
A_64_P120190	0.04439286	up	3.3960447	3.3960447	1.7638555	LOC688637	PREDICTED: Rattus norvegicus similar to WD repeat domain 36 (LOC688637), transcript variant X2, partial mRNA [XM_006222563]
A_44_P1107758	0.028455077	up	3.394646	3.394646	1.7632611	Lmbr1l	limb development membrane protein 1-like [Source:RGD Symbol;Acc:1309631] [ENSRNOT00000082375]
A_64_P150583	0.03199077	up	3.394243	3.394243	1.7630898
A_64_P029312	0.04105839	up	3.3906794	3.3906794	1.7615744	Prnd	Rattus norvegicus prion protein 2 (dublet) (Prnd), mRNA [NM_001102431]
A_44_P1127469	0.021807991	up	3.377942	3.377942	1.7561445	LOC103692717	PREDICTED: Rattus norvegicus uncharacterized LOC103692717 (LOC103692717), ncRNA [XR_593208]
A_44_P538839	0.023070868	up	3.3587928	3.3587928	1.7479428	Rasgrp2	Rattus norvegicus RAS guanyl releasing protein 2 (calcium and DAG-regulated) (Rasgrp2), mRNA [NM_001082977]
A_44_P1154811	0.01866681	up	3.3468127	3.3468127	1.7427878
A_42_P672071	0.033746388	down	3.3269904	-3.3269904	-1.7342176	Ccl19	Rattus norvegicus C-C motif chemokine ligand 19 (Ccl19), mRNA [NM_001108661]
A_64_P007074	0.038663425	up	3.319216	3.319216	1.7308425	Rasgrp4	Rattus norvegicus RAS guanyl releasing protein 4 (Rasgrp4), mRNA [NM_130824]
A_44_P1110361	0.024498355	up	3.3014617	3.3014617	1.7231048	LOC103693451	PREDICTED: Rattus norvegicus transmembrane protein 92-like (LOC103693451), transcript variant X1, mRNA [XM_008768247]
A_44_P379360	0.047280584	up	3.2908337	3.2908337	1.718453	Fut7	Rattus norvegicus fucosyltransferase 7 (Fut7), mRNA [NM_199491]
A_44_P1363301	0.017661668	up	3.286317	3.286317	1.7164717	Ldlrad1	low density lipoprotein receptor class A domain containing 1 [Source:RGD Symbol;Acc:1597398] [ENSRNOT00000057372]
A_64_P017781	0.018501585	up	3.2752924	3.2752924	1.7116237	Gmcl1	Rattus norvegicus germ cell-less, spermatogenesis associated 1 (Gmcl1), transcript variant 2, mRNA [NM_001010956]
A_42_P696406	0.03495999	down	3.2701533	-3.2701533	-1.7093582	NEWGENE_6497122	FLYWCH family member 2 [Source:RGD Symbol;Acc:11436072] [ENSRNOT00000005899]
A_44_P1128706	0.044805616	up	3.2681725	3.2681725	1.708484
A_64_P013526	0.04894889	up	3.2179263	3.2179263	1.6861312	Cxadr	Rattus norvegicus coxsackie virus and adenovirus receptor (Cxadr), mRNA [NM_053570]
A_64_P032725	0.028580943	up	3.2084503	3.2084503	1.6818767	Dctn4	Rattus norvegicus dynactin subunit 4 (Dctn4), mRNA [NM_053404]
A_43_P19053	0.031591352	up	3.2033436	3.2033436	1.6795785	Pskh1	protein serine kinase H1 [Source:RGD Symbol;Acc:1304648] [ENSRNOT00000089921]
A_44_P1084440	0.029058719	down	3.193163	-3.193163	-1.6749861	Med28	Rattus norvegicus mediator complex subunit 28 (Med28), mRNA [NM_001107217]
A_44_P1133720	0.036617417	up	3.1896079	3.1896079	1.6733791	LOC102547958	PREDICTED: Rattus norvegicus uncharacterized LOC102547958 (LOC102547958), transcript variant X1, ncRNA [XR_339599]
A_44_P384389	0.046532784	down	3.159629	-3.159629	-1.6597552
A_44_P1109574	0.028234478	up	3.1578746	3.1578746	1.6589539	Atf7ip2	PREDICTED: Rattus norvegicus activating transcription factor 7 interacting protein 2 (Atf7ip2), transcript variant X5, mRNA [XM_008767496]
A_44_P433003	0.03197154	up	3.1515565	3.1515565	1.6560645		UI-R-FJ0-cpu-a-09-0-UI.s1 UI-R-FJ0 Rattus norvegicus cDNA clone UI-R-FJ0-cpu-a-09-0-UI 3', mRNA sequence [CA503425]
A_44_P1149246	0.038050193	down	3.1428726	-3.1428726	-1.6520838	LOC103693373	PREDICTED: Rattus norvegicus uncharacterized LOC103693373 (LOC103693373), ncRNA [XR_596086]
A_42_P588785	0.043837395	down	3.138991	-3.138991	-1.650301	Mthfd2	Rattus norvegicus methylenetetrahydrofolate dehydrogenase (NADP+ dependent) 2, methenyltetrahydrofolate cyclohydrolase (Mthfd2), mRNA [NM_001109398]
A_44_P1138918	0.026836984	up	3.1193075	3.1193075	1.6412258	LOC102551836	PREDICTED: Rattus norvegicus uncharacterized LOC102551836 (LOC102551836), ncRNA [XR_341990]
A_44_P765013	0.03494367	down	3.1144996	-3.1144996	-1.6390003	Rnf186	Rattus norvegicus ring finger protein 186 (Rnf186), mRNA [NM_001109592]
A_44_P1152848	0.047170732	down	3.0876765	-3.0876765	-1.6265216	Zdhhc2	PREDICTED: Rattus norvegicus zinc finger, DHHC-type containing 2 (Zdhhc2), transcript variant X1, mRNA [XM_008771288]
A_44_P1103610	0.027314316	down	3.075141	-3.075141	-1.6206526	Mtx2	PREDICTED: Rattus norvegicus metaxin 2 (Mtx2), transcript variant X2, mRNA [XM_006234371]
A_44_P1149318	0.044275384	up	3.0639346	3.0639346	1.6153854	Setdb2	PREDICTED: Rattus norvegicus SET domain, bifurcated 2 (Setdb2), transcript variant X3, mRNA [XM_008769142]
A_44_P256534	0.035285357	up	3.061277	3.061277	1.6141335	Heca	Rattus norvegicus hdc homolog, cell cycle regulator (Heca), mRNA [NM_001107514]
A_64_P087847	0.047972336	up	3.0513666	3.0513666	1.6094555	Tmprss3	Rattus norvegicus transmembrane protease, serine 3 (Tmprss3), mRNA [NM_001107619]
A_44_P1080382	0.023998482	up	3.0487502	3.0487502	1.608218	Olr1400	Rattus norvegicus olfactory receptor 1400 (Olr1400), mRNA [NM_001001096]
A_44_P395654	0.042210005	up	3.0265784	3.0265784	1.5976877	Olr1516	Rattus norvegicus olfactory receptor 1516 (Olr1516), mRNA [NM_001000038]
A_64_P112058	0.03671689	up	3.0230315	3.0230315	1.595996		PREDICTED: Rattus norvegicus similar to oocyte specific homeobox 3 (LOC691325), transcript variant X1, mRNA [XM_001077719]
A_44_P738731	0.023256173	up	2.996561	2.996561	1.5833077		UI-R-DB0-byq-f-12-0-UI.s1 UI-R-DB0 Rattus norvegicus cDNA clone UI-R-DB0-byq-f-12-0-UI 3', mRNA sequence [BI283963]
A_44_P1147393	0.026304448	up	2.991959	2.991959	1.5810905	LOC102550737	PREDICTED: Rattus norvegicus uncharacterized LOC102550737 (LOC102550737), transcript variant X1, ncRNA [XR_357044]
A_64_P031742	0.038273476	up	2.991288	2.991288	1.5807668		AGENCOURT_66963211 NIH_MGC_366 Rattus norvegicus cDNA clone IMAGE:8367730 5', mRNA sequence [DY320421]
A_44_P630082	0.04466578	up	2.9881263	2.9881263	1.579241	LOC100912849	uncharacterized LOC100912849 [Source:RGD Symbol;Acc:6485345] [ENSRNOT00000020640]
A_44_P1091516	0.045577064	up	2.9873283	2.9873283	1.5788558
A_64_P041576	0.028217647	up	2.9823477	2.9823477	1.5764484	Btla	Rattus norvegicus B and T lymphocyte associated (Btla), mRNA [NM_213630]
A_44_P1162885	0.029242693	down	2.9743905	-2.9743905	-1.572594
A_44_P1035007	0.027401088	up	2.9534054	2.9534054	1.5623794	Chrne	Rattus norvegicus cholinergic receptor nicotinic epsilon subunit (Chrne), mRNA [NM_017194]
A_44_P618725	0.029309876	up	2.9512897	2.9512897	1.5613455		UI-R-AE1-zj-h-05-0-UI.s10 UI-R-AE1 Rattus norvegicus cDNA clone UI-R-AE1-zj-h-05-0-UI 3', mRNA sequence [CK839132]
A_44_P1101051	0.045801386	down	2.9435816	-2.9435816	-1.5575726	Prr12	PREDICTED: Rattus norvegicus proline rich 12 (Prr12), transcript variant X1, mRNA [XM_008759481]
A_44_P1084685	0.036090508	up	2.9408085	2.9408085	1.5562128	Ppm1k	Rattus norvegicus protein phosphatase, Mg2+/Mn2+ dependent, 1K (Ppm1k), mRNA [NM_001107863]
A_44_P1049827	0.04694911	up	2.9258091	2.9258091	1.5488356	Nsg1	Rattus norvegicus neuron specific gene family member 1 (Nsg1), mRNA [NM_024128]
A_44_P930826	0.047223363	up	2.9249206	2.9249206	1.5483974	Clec2dl1	C-type lectin domain family 2, member D [Source:RGD Symbol;Acc:620070] [ENSRNOT00000087850]
A_44_P1159462	0.040300366	up	2.912536	2.912536	1.5422758	Limk2	Rattus norvegicus LIM domain kinase 2 (Limk2), mRNA [NM_024135]
A_44_P1365928	0.026805194	up	2.8986068	2.8986068	1.5353596
A_44_P1137800	0.030248346	up	2.887678	2.887678	1.5299098	LOC102549787	PREDICTED: Rattus norvegicus uncharacterized LOC102549787 (LOC102549787), transcript variant X3, ncRNA [XR_596662]
A_44_P962047	0.049014248	down	2.886546	-2.886546	-1.5293442	LOC103693540	PREDICTED: Rattus norvegicus uncharacterized LOC103693540 (LOC103693540), mRNA [XM_017598216]
A_44_P1098747	0.036130425	up	2.874195	2.874195	1.523158	Pbld2	PREDICTED: Rattus norvegicus phenazine biosynthesis-like protein domain containing 2 (Pbld2), mRNA [XM_002728946]
A_44_P366142	0.026690079	up	2.87329	2.87329	1.5227036	Zbtb16	Rattus norvegicus zinc finger and BTB domain containing 16 (Zbtb16), mRNA [NM_001013181]
A_64_P048117	0.0448331	up	2.8696434	2.8696434	1.5208715	Foxp3	Rattus norvegicus forkhead box P3 (Foxp3), mRNA [NM_001108250]
A_44_P1088497	0.032456975	up	2.8596795	2.8596795	1.5158534	Olr734	Rattus norvegicus olfactory receptor 734 (Olr734), mRNA [NM_001000617]
A_44_P1141994	0.04379283	down	2.8257005	-2.8257005	-1.4986086	LOC103690979	PREDICTED: Rattus norvegicus uncharacterized LOC103690979 (LOC103690979), ncRNA [XR_589949]
A_44_P368065	0.034125164	up	2.8178287	2.8178287	1.4945838	Adprhl1	Rattus norvegicus ADP-ribosylhydrolase like 1 (Adprhl1), mRNA [NM_001013054]
A_44_P1144275	0.04551259	up	2.817329	2.817329	1.494328	LOC102554065	PREDICTED: Rattus norvegicus uncharacterized LOC102554065 (LOC102554065), ncRNA [XR_001837338]
A_44_P1123569	0.041778266	up	2.815572	2.815572	1.493428	LOC103690249	PREDICTED: Rattus norvegicus uncharacterized LOC103690249 (LOC103690249), ncRNA [XR_001837782]
A_44_P838331	0.048617776	up	2.8107278	2.8107278	1.4909438	Pde3a	PREDICTED: Rattus norvegicus phosphodiesterase 3A (Pde3a), transcript variant X1, mRNA [XM_008763422]
A_44_P198396	0.030215152	down	2.8088934	-2.8088934	-1.4900019	Scd2	Rattus norvegicus stearoyl-Coenzyme A desaturase 2 (Scd2), mRNA [NM_031841]
A_44_P1122382	0.04121595	up	2.8084764	2.8084764	1.4897877	Cep152	PREDICTED: Rattus norvegicus centrosomal protein 152 (Cep152), transcript variant X13, misc_RNA [XR_600323]
A_44_P1131223	0.04166283	up	2.7845118	2.7845118	1.4774244	LOC100910623	PREDICTED: Rattus norvegicus uncharacterized LOC100910623 (LOC100910623), mRNA [XM_017597582]
A_44_P1092623	0.032453567	down	2.7771711	-2.7771711	-1.473616	LOC691918	PREDICTED: Rattus norvegicus similar to Centrosomal protein of 27 kDa (Cep27 protein) (LOC691918), transcript variant X2, mRNA [XM_003753760]
A_44_P1157016	0.041291293	up	2.7613268	2.7613268	1.4653616	Nxph3	neurexophilin 3 [Source:RGD Symbol;Acc:620693] [ENSRNOT00000007133]
A_42_P604382	0.041270874	down	2.749493	-2.749493	-1.4591656	Myoz1	Rattus norvegicus myozenin 1 (Myoz1), mRNA [NM_001109097]
A_42_P564637	0.046099912	up	2.7289097	2.7289097	1.4483247	LOC100910069	PREDICTED: Rattus norvegicus uncharacterized LOC100910069 (LOC100910069), mRNA [XM_017596110]
A_44_P1130040	0.041406006	up	2.7287855	2.7287855	1.448259	LOC102557192	PREDICTED: Rattus norvegicus uncharacterized LOC102557192 (LOC102557192), transcript variant X2, ncRNA [XR_589130]
A_44_P1099555	0.035243604	up	2.72551	2.72551	1.4465262
A_43_P10931	0.03760648	up	2.7137237	2.7137237	1.4402738	Gpr68	Rattus norvegicus G protein-coupled receptor 68 (Gpr68), mRNA [NM_001108049]
A_64_P033722	0.03736814	up	2.704184	2.704184	1.4351933	Fam229a	Rattus norvegicus family with sequence similarity 229, member A (Fam229a), mRNA [NM_001109266]
A_42_P507566	0.040027734	up	2.6862884	2.6862884	1.4256141	Tnfaip2	Rattus norvegicus TNF alpha induced protein 2 (Tnfaip2), mRNA [NM_001137633]
A_44_P1135432	0.044897772	up	2.6714325	2.6714325	1.4176135	LOC102552414	PREDICTED: Rattus norvegicus uncharacterized LOC102552414 (LOC102552414), transcript variant X1, ncRNA [XR_595977]
A_44_P1121667	0.041056484	up	2.6708364	2.6708364	1.4172916	LOC102550940	PREDICTED: Rattus norvegicus uncharacterized LOC102550940 (LOC102550940), ncRNA [XR_001842609]
A_64_P107034	0.040995702	up	2.666895	2.666895	1.415161	Olr1395	Rattus norvegicus olfactory receptor 1395 (Olr1395), mRNA [NM_001001092]
A_44_P1133164	0.049302652	down	2.6628034	-2.6628034	-1.4129459	LOC102550200	PREDICTED: Rattus norvegicus uncharacterized LOC102550200 (LOC102550200), ncRNA [XR_339324]
A_44_P135401	0.036122072	up	2.6425023	2.6425023	1.4019047	LOC292543	Rattus norvegicus similar to solute carrier family 7 (cationic amino acid transporter, y+ system), member 3 (LOC292543), mRNA [NM_001025639]
A_64_P010204	0.04507989	down	2.6421475	-2.6421475	-1.401711	Clstn1	Rattus norvegicus calsyntenin 1 (Clstn1), mRNA [NM_001007092]
A_44_P1117346	0.047182728	down	2.6407743	-2.6407743	-1.4009609	Mas1l	PREDICTED: Rattus norvegicus MAS1 proto-oncogene like, G protein-coupled receptor (Mas1l), transcript variant X5, misc_RNA [XR_001835454]
A_44_P505440	0.047096588	up	2.6403039	2.6403039	1.4007039		UI-R-FS0-crt-d-06-0-UI.s1 UI-R-FS0 Rattus norvegicus cDNA clone UI-R-FS0-crt-d-06-0-UI 3', mRNA sequence [CB327764]
A_43_P13109	0.03702213	up	2.6343927	2.6343927	1.3974705	Cyp26a1	Rattus norvegicus cytochrome P450, family 26, subfamily a, polypeptide 1 (Cyp26a1), mRNA [NM_130408]
A_64_P021980	0.043317553	down	2.625089	-2.625089	-1.3923663	Sstr4	Rattus norvegicus somatostatin receptor 4 (Sstr4), mRNA [NM_013036]
A_43_P13633	0.047717396	up	2.6186032	2.6186032	1.3887974	Atrx	ATRX, chromatin remodeler [Source:RGD Symbol;Acc:619795] [ENSRNOT00000091284]
A_64_P023365	0.045625873	down	2.5973988	-2.5973988	-1.3770674	Abcb10	Rattus norvegicus ATP binding cassette subfamily B member 10 (Abcb10), mRNA [NM_001012166]
A_44_P999395	0.04582873	up	2.5828767	2.5828767	1.3689787	Lmbr1l	Rattus norvegicus limb development membrane protein 1-like (Lmbr1l), mRNA [NM_001013950]
A_64_P152741	0.04013975	up	2.5683408	2.5683408	1.3608366		coiled-coil domain containing 142 [Source:RGD Symbol;Acc:1561779] [ENSRNOT00000082806]
A_44_P1154781	0.049114592	up	2.528697	2.528697	1.3383942
A_44_P436409	0.04391782	up	2.5255203	2.5255203	1.3365806	Wdtc1	Rattus norvegicus WD and tetratricopeptide repeats 1 (Wdtc1), mRNA [NM_001107908]
A_44_P798851	0.043931846	down	2.5120444	-2.5120444	-1.328862		UI-R-DK0-cfb-d-06-0-UI.s1 UI-R-DK0 Rattus norvegicus cDNA clone UI-R-DK0-cfb-d-06-0-UI 3', mRNA sequence [BI295850]
A_44_P246435	0.044860404	down	2.5086188	-2.5086188	-1.3268932		UI-R-FS0-cqt-l-05-0-UI.s1 UI-R-FS0 Rattus norvegicus cDNA clone UI-R-FS0-cqt-l-05-0-UI 3', mRNA sequence [CA510131]
A_44_P517591	0.04509386	up	2.489518	2.489518	1.3158664	Eef2k	eukaryotic elongation factor-2 kinase [Source:RGD Symbol;Acc:2538] [ENSRNOT00000022726]
A_44_P1152356	0.049996406	up	2.4739199	2.4739199	1.3067987	Ddx60	PREDICTED: Rattus norvegicus DEXD/H-box helicase 60 (Ddx60), transcript variant X1, mRNA [XM_017600406]
A_44_P1083677	0.04534511	down	2.4520514	-2.4520514	-1.2939892	Sall2	Rattus norvegicus spalt-like transcription factor 2 (Sall2), mRNA [NM_001107262]
A_44_P939143	0.049290754	up	2.4298306	2.4298306	1.2808557	LOC501396	PREDICTED: Rattus norvegicus hypothetical protein LOC501396 (LOC501396), transcript variant X1, mRNA [XM_017599514]

## Sheet: TiO2NPs Lung
ProbeName	p value	Regulation	FC (abs)	FC	Log FC	GeneSymbol	Description
A_42_P602724	0.0034406555	up	17.734505	17.734505	4.148487	Ubd	Rattus norvegicus ubiquitin D (Ubd), mRNA [NM_053299]
A_64_P112429	0.011663865	down	15.409761	-15.409761	-3.9457726	Defb5	Rattus norvegicus defensin beta 5 (Defb5), mRNA [NM_001037549]
A_64_P072983	4.1398575E-4	up	13.055852	13.055852	3.7066247	RGD1562136	Rattus norvegicus similar to D1Ertd622e protein (RGD1562136), mRNA [NM_001109086]
A_42_P548410	0.009401557	up	10.642332	10.642332	3.4117424	Acot1	Rattus norvegicus acyl-CoA thioesterase 1 (Acot1), mRNA [NM_031315]
A_64_P098501	0.0017974055	up	10.428856	10.428856	3.382509	Tubb1	tubulin, beta 1 class VI [Source:RGD Symbol;Acc:1589557] [ENSRNOT00000075148]
A_43_P15362	0.016638283	down	10.190169	-10.190169	-3.349106	Slc9a5	Rattus norvegicus solute carrier family 9 member A5 (Slc9a5), mRNA [NM_138858]
A_64_P081352	0.023841456	down	8.863387	-8.863387	-3.1478581	Kcnc3	RATKCHANB potassium channel protein {Rattus norvegicus} (exp=-1; wgp=0; cg=0), complete [TC600659]
A_64_P112185	0.030408716	down	8.615833	-8.615833	-3.1069903		nebulin [Source:RGD Symbol;Acc:1311134] [ENSRNOT00000059461]
A_64_P010268	0.004508621	down	8.194179	-8.194179	-3.0345993	LOC102556662	PREDICTED: Rattus norvegicus uncharacterized LOC102556662 (LOC102556662), ncRNA [XR_349460]
A_44_P111662	0.010738953	down	8.173165	-8.173165	-3.030895	Ly49s3	Rattus norvegicus Ly-49 stimulatory receptor 3 (Ly49s3), mRNA [NM_153726]
A_64_P100684	0.038267657	down	6.8462462	-6.8462462	-2.7753131	Trabd2b	PREDICTED: Rattus norvegicus TraB domain containing 2B (Trabd2b), transcript variant X2, mRNA [XM_001072500]
A_64_P125775	0.002997409	down	6.7691026	-6.7691026	-2.7589645		vomeronasal 2 receptor, 65 [Source:RGD Symbol;Acc:1592357] [ENSRNOT00000033032]
A_64_P095680	0.019181937	down	6.717637	-6.717637	-2.747954	Ryr3	PREDICTED: Rattus norvegicus ryanodine receptor 3 (Ryr3), transcript variant X1, mRNA [XM_017592338]
A_64_P064336	0.005422707	up	6.6861606	6.6861606	2.741178	RT1-T18	Rattus norvegicus RT1 class Ib, locus T18 (RT1-T18), mRNA [NM_001002821]
A_64_P145342	0.0028875154	up	6.6173124	6.6173124	2.7262454
A_64_P128260	0.011891434	down	6.57957	-6.57957	-2.7179933	Duxbl1	double homeobox B-like 1 [Source:RGD Symbol;Acc:1311053] [ENSRNOT00000052224]
A_44_P182835	0.009555077	up	6.4330964	6.4330964	2.6855133	Ppp1r3g	protein phosphatase 1, regulatory subunit 3G [Source:RGD Symbol;Acc:1308930] [ENSRNOT00000021704]
A_44_P452114	0.0023994585	down	6.431112	-6.431112	-2.6850681	Gls	Rattus norvegicus glutaminase (Gls), nuclear gene encoding mitochondrial protein, transcript variant 2, mRNA [NM_001109968]
A_64_P021149	0.047604937	down	6.370939	-6.370939	-2.671506	LOC108349347	PREDICTED: Rattus norvegicus disks large homolog 5-like (LOC108349347), transcript variant X1, mRNA [XM_017596829]
A_64_P057824	0.0014785329	down	6.2982106	-6.2982106	-2.654942	Vom2r72	Rattus norvegicus vomeronasal 2 receptor, 72 (Vom2r72), mRNA [NM_001099517]
A_64_P129273	0.0243975	up	6.290395	6.290395	2.6531506	Hrasls	Rattus norvegicus HRAS-like suppressor (Hrasls), mRNA [NM_001105871]
A_64_P072189	0.0046030954	up	6.2253284	6.2253284	2.63815	Mgat3	Rattus norvegicus mannosyl (beta-1,4-)-glycoprotein beta-1,4-N-acetylglucosaminyltransferase (Mgat3), mRNA [NM_019239]
A_43_P19799	0.013577369	down	5.990803	-5.990803	-2.5827494	RGD1563222	Rattus norvegicus similar to RIKEN cDNA A930018P22 (RGD1563222), mRNA [NM_001108585]
A_42_P807826	0.031825747	down	5.767977	-5.767977	-2.5280654	Syne1	PREDICTED: Rattus norvegicus spectrin repeat containing nuclear envelope protein 1 (Syne1), transcript variant X4, mRNA [XM_006227853]
A_64_P019170	0.029146101	down	5.7274656	-5.7274656	-2.517897	Ly49s6	Rattus norvegicus Ly49 stimulatory receptor 6 (Ly49s6), mRNA [NM_001009488]
A_64_P019907	0.038400378	down	5.64569	-5.64569	-2.49715	Ly49i4	Rattus norvegicus Ly49 inhibitory receptor 4 (Ly49i4), mRNA [NM_001009495]
A_64_P018831	0.012168935	down	5.5463834	-5.5463834	-2.4715474	LOC108352875	PREDICTED: Rattus norvegicus disks large homolog 5-like (LOC108352875), transcript variant X3, mRNA [XM_017604889]
A_64_P021206	0.010255361	down	5.4986005	-5.4986005	-2.4590645
A_64_P144263	0.043857116	down	5.4181895	-5.4181895	-2.437811	Cxcl14	Rattus norvegicus C-X-C motif chemokine ligand 14 (Cxcl14), mRNA [NM_001013137]
A_64_P158345	0.043743175	down	5.4047565	-5.4047565	-2.4342296		Rattus norvegicus similar to DEAD/DEAH box helicase and helicase, C-terminal (194.0 kD) (3H3) (LOC306407), mRNA [XM_224793]
A_64_P121379	0.0024345494	down	5.3610473	-5.3610473	-2.422515	Lypd8	Rattus norvegicus LY6/PLAUR domain containing 8 (Lypd8), mRNA [NM_001109632]
A_64_P146637	0.002598373	down	5.3339076	-5.3339076	-2.4151928
A_64_P059645	0.0028306525	down	5.2838497	-5.2838497	-2.4015894	Bcan	Rattus norvegicus brevican (Bcan), transcript variant 1, mRNA [NM_001033665]
A_44_P1029435	0.040303305	up	5.280448	5.280448	2.4006603	Ppm1k	Rattus norvegicus protein phosphatase, Mg2+/Mn2+ dependent, 1K (Ppm1k), mRNA [NM_001107863]
A_44_P342578	0.0039098025	down	5.2578096	-5.2578096	-2.3944619	Nexmif	Rattus norvegicus similar to KIAA2022 protein (RGD1561931), mRNA [NM_001313815]
A_44_P1043181	0.04521507	down	5.208031	-5.208031	-2.380738	Plekhn1	Rattus norvegicus pleckstrin homology domain containing N1 (Plekhn1), mRNA [NM_001134523]
A_44_P1034910	0.048329227	down	5.204799	-5.204799	-2.3798425	Rtn2	Rattus norvegicus reticulon 2 (Rtn2), mRNA [NM_201562]
A_64_P002053	0.0076668477	down	5.184951	-5.184951	-2.3743303	Camk2d	Rattus norvegicus calcium/calmodulin-dependent protein kinase II delta (Camk2d), mRNA [NM_012519]
A_42_P462257	0.03157832	down	5.1535635	-5.1535635	-2.3655703	Rprml	Rattus norvegicus reprimo-like (Rprml), mRNA [NM_001109481]
A_64_P115405	0.03273492	down	5.124575	-5.124575	-2.3574324	RGD1308117	Rattus norvegicus similar to 9930012K11Rik protein (RGD1308117), mRNA [NM_001134571]
A_64_P115188	0.021238297	down	5.1210136	-5.1210136	-2.3564293		vomeronasal 2 receptor, 71 [Source:RGD Symbol;Acc:1597426] [ENSRNOT00000049544]
A_43_P22744	0.012636533	down	5.064972	-5.064972	-2.3405542	Adcy9	Rattus norvegicus adenylate cyclase 9 (Adcy9), mRNA [NM_001106980]
A_64_P058893	0.008656634	down	5.0606594	-5.0606594	-2.3393254
A_64_P007872	0.0051464164	down	4.9364247	-4.9364247	-2.3034666	Cdr1	PREDICTED: Rattus norvegicus cerebellar degeneration related protein 1 (Cdr1), mRNA [XM_017602206]
A_44_P114833	0.0021952551	down	4.9185376	-4.9185376	-2.2982295		similar to Discs large homolog 5 (Placenta and prostate DLG) (Discs large protein P-dlg) [Source:RGD Symbol;Acc:1592283] [ENSRNOT00000050464]
A_44_P541053	0.04816753	down	4.8907313	-4.8907313	-2.2900503	Fbln5	Rattus norvegicus fibulin 5 (Fbln5), mRNA [NM_019153]
A_64_P009560	0.0028472773	down	4.8644233	-4.8644233	-2.2822688	Zscan10	Rattus norvegicus zinc finger and SCAN domain containing 10 (Zscan10), mRNA [NM_001106981]
A_44_P539680	0.005578551	down	4.798529	-4.798529	-2.2625923	Ralgapa1	Rattus norvegicus Ral GTPase activating protein catalytic alpha subunit 1 (Ralgapa1), mRNA [NM_020083]
A_64_P005491	0.002167993	down	4.779234	-4.779234	-2.2567794	LOC108350833	PREDICTED: Rattus norvegicus uncharacterized LOC108350833 (LOC108350833), transcript variant X2, ncRNA [XR_001843235]
A_42_P688266	0.048252027	down	4.777569	-4.777569	-2.2562766	Arap3	PREDICTED: Rattus norvegicus ArfGAP with RhoGAP domain, ankyrin repeat and PH domain 3 (Arap3), transcript variant X3, mRNA [XM_008774115]
A_64_P019908	0.0044458928	down	4.7627816	-4.7627816	-2.2518044	Ly49i4	Rattus norvegicus Ly49 inhibitory receptor 4 (Ly49i4), mRNA [NM_001009495]
A_64_P041270	0.014641506	down	4.7453485	-4.7453485	-2.246514	Fras1	Rattus norvegicus Fraser extracellular matrix complex subunit 1 (Fras1), mRNA [NM_001191595]
A_43_P12992	0.011229448	down	4.739926	-4.739926	-2.2448645	Kcnh2	Rattus norvegicus potassium voltage-gated channel subfamily H member 2 (Kcnh2), mRNA [NM_053949]
A_44_P1014018	0.040071823	down	4.661966	-4.661966	-2.2209384	Mex3d	PREDICTED: Rattus norvegicus mex-3 RNA binding family member D (Mex3d), partial mRNA [XM_006241041]
A_64_P091385	0.0047462326	down	4.6283526	-4.6283526	-2.2104988	Stac2	Rattus norvegicus SH3 and cysteine rich domain 2 (Stac2), mRNA [NM_001108834]
A_44_P317912	0.04570241	down	4.620207	-4.620207	-2.2079575	Aldh1a2	Rattus norvegicus aldehyde dehydrogenase 1 family, member A2 (Aldh1a2), mRNA [NM_053896]
A_44_P235978	0.03228821	down	4.596046	-4.596046	-2.2003932	Fasn	Rattus norvegicus fatty acid synthase (Fasn), mRNA [NM_017332]
A_64_P060133	0.0030867434	down	4.5838585	-4.5838585	-2.1965625	Haus8	Rattus norvegicus HAUS augmin-like complex, subunit 8 (Haus8), mRNA [NM_001024971]
A_64_P157820	0.006020747	down	4.517351	-4.517351	-2.175477	LOC108349310	PREDICTED: Rattus norvegicus CD99 antigen-like protein 2 (LOC108349310), transcript variant X3, mRNA [XM_017588452]
A_64_P101404	0.042588457	down	4.492504	-4.492504	-2.1675198	Moxd1	monooxygenase, DBH-like 1 [Source:RGD Symbol;Acc:1310033] [ENSRNOT00000061234]
A_64_P099424	0.019297343	down	4.428589	-4.428589	-2.146847	LOC100912988	PREDICTED: Rattus norvegicus uncharacterized LOC100912988 (LOC100912988), transcript variant X6, ncRNA [XR_001835252]
A_64_P088970	0.025410801	down	4.382119	-4.382119	-2.1316288
A_64_P041134	0.038546868	down	4.379981	-4.379981	-2.1309247	Kl	Rattus norvegicus Klotho (Kl), mRNA [NM_031336]
A_44_P203145	0.023785887	down	4.370197	-4.370197	-2.1276982	Cacna1c	Rattus norvegicus calcium voltage-gated channel subunit alpha1 C (Cacna1c), mRNA [NM_012517]
A_42_P780932	0.026522389	up	4.328275	4.328275	2.1137922	Fcna	Rattus norvegicus ficolin A (Fcna), mRNA [NM_031348]
A_64_P137214	0.0037552074	down	4.3071637	-4.3071637	-2.106738	Grk4	Rattus norvegicus G protein-coupled receptor kinase 4 (Grk4), mRNA [NM_022928]
A_64_P148409	0.04510462	up	4.2878404	4.2878404	2.1002512
A_64_P066495	0.006523959	up	4.285406	4.285406	2.099432	Fam90a1	family with sequence similarity 90, member A1A [Source:MGI Symbol;Acc:MGI:2142877] [ENSRNOT00000080407]
A_64_P022248	0.010445327	down	4.261444	-4.261444	-2.0913424	Ccdc62	Rattus norvegicus coiled-coil domain containing 62 (Ccdc62), mRNA [NM_001134766]
A_44_P335079	0.012810285	up	4.254859	4.254859	2.0891113	Tff3	Rattus norvegicus trefoil factor 3 (Tff3), mRNA [NM_013042]
A_64_P099900	0.024220334	up	4.213742	4.213742	2.0751019	Kap	Rattus norvegicus kidney androgen regulated protein (Kap), mRNA [NM_052802]
A_64_P083918	0.017642584	down	4.202801	-4.202801	-2.0713513	Adcy7	Rattus norvegicus adenylate cyclase 7 (Adcy7), mRNA [NM_053396]
A_44_P356375	0.024661604	down	4.1982627	-4.1982627	-2.0697925	Slain1	Rattus norvegicus SLAIN motif family, member 1 (Slain1), mRNA [NM_001014139]
A_64_P089561	0.019839086	up	4.1860347	4.1860347	2.0655842	Steap4	Rattus norvegicus STEAP4 metalloreductase (Steap4), mRNA [NM_001044265]
A_64_P244957	0.034876283	down	4.1596746	-4.1596746	-2.0564706		ubiquitin-activating enzyme, Chr Y [Source:RGD Symbol;Acc:3925] [ENSRNOT00000092178]
A_64_P135147	0.04977582	down	4.1217766	-4.1217766	-2.0432663	Nek5	PREDICTED: Rattus norvegicus NIMA-related kinase 5 (Nek5), mRNA [XM_008771370]
A_64_P084403	0.03367905	down	4.120163	-4.120163	-2.0427015	Caly	Rattus norvegicus calcyon neuron-specific vesicular protein (Caly), transcript variant 1, mRNA [NM_138915]
A_64_P158975	0.005640633	down	4.1110563	-4.1110563	-2.039509	Ptx3	Rattus norvegicus pentraxin 3 (Ptx3), mRNA [NM_001109536]
A_44_P243355	0.020286236	down	4.091563	-4.091563	-2.0326521	Atp10a	Rattus norvegicus ATPase, class V, type 10A (Atp10a), mRNA [NM_001141935]
A_44_P359113	0.005571247	down	4.0903025	-4.0903025	-2.0322075	Col6a4	Rattus norvegicus collagen, type VI, alpha 4 (Col6a4), mRNA [NM_001271182]
A_44_P927439	0.003347545	down	4.0469513	-4.0469513	-2.0168355	Adam9	Rattus norvegicus ADAM metallopeptidase domain 9 (Adam9), mRNA [NM_001014772]
A_64_P133696	0.021540988	down	4.038373	-4.038373	-2.0137742	Morc3	Rattus norvegicus MORC family CW-type zinc finger 3 (Morc3), mRNA [NM_001107109]
A_64_P087409	0.006252471	down	4.021734	-4.021734	-2.0078177		similar to SET domain-containing protein [Source:RGD Symbol;Acc:1561318] [ENSRNOT00000075783]
A_64_P031740	0.005163469	down	4.001486	-4.001486	-2.0005357	MGC116197	Rattus norvegicus similar to RIKEN cDNA 1700001E04 (MGC116197), mRNA [NM_001025755]
A_44_P999395	0.006298644	down	3.9944708	-3.9944708	-1.9980043	Lmbr1l	Rattus norvegicus limb development membrane protein 1-like (Lmbr1l), mRNA [NM_001013950]
A_44_P608318	0.0064952206	down	3.9908512	-3.9908512	-1.9966965	Fam167a	Rattus norvegicus family with sequence similarity 167, member A (Fam167a), mRNA [NM_001109102]
A_44_P612762	0.0034576363	down	3.9762886	-3.9762886	-1.9914224	Lrrc8c	Rattus norvegicus leucine rich repeat containing 8 family, member C (Lrrc8c), mRNA [NM_001037179]
A_64_P048972	0.0060721776	down	3.9616203	-3.9616203	-1.9860905		transmembrane and tetratricopeptide repeat containing 1 [Source:RGD Symbol;Acc:1564868] [ENSRNOT00000064320]
A_43_P15424	0.009808007	down	3.9564366	-3.9564366	-1.9842017	Rapgef3	Rattus norvegicus Rap guanine nucleotide exchange factor 3 (Rapgef3), mRNA [NM_021690]
A_64_P045461	0.006993942	down	3.953333	-3.953333	-1.9830694	Flrt2	Rattus norvegicus fibronectin leucine rich transmembrane protein 2 (Flrt2), mRNA [NM_001106750]
A_64_P097847	0.02989418	down	3.9497156	-3.9497156	-1.9817487	RGD1309104	Rattus norvegicus similar to RIKEN cDNA 1700025G04 gene (RGD1309104), mRNA [NM_001105959]
A_64_P048250	0.03862367	down	3.9434102	-3.9434102	-1.9794438	Fam234b	Rattus norvegicus family with sequence similarity 234, member B (Fam234b), mRNA [NM_001108652]
A_64_P106131	0.044435475	up	3.9431117	3.9431117	1.9793346
A_64_P122078	0.010948118	down	3.9397988	-3.9397988	-1.978122	Atxn2l	Rattus norvegicus ataxin 2-like (Atxn2l), mRNA [NM_001130097]
A_64_P062239	0.011804841	down	3.9218717	-3.9218717	-1.9715424	Cep290	Rattus norvegicus centrosomal protein 290 (Cep290), mRNA [NM_001135755]
A_64_P022447	0.028829293	down	3.9174457	-3.9174457	-1.9699132	Slc4a11	Rattus norvegicus solute carrier family 4 member 11 (Slc4a11), mRNA [NM_001107775]
A_64_P097578	0.0057192217	down	3.916658	-3.916658	-1.9696231		jagged 2 [Source:RGD Symbol;Acc:2938] [ENSRNOT00000019213]
A_64_P051507	0.007631433	down	3.9092853	-3.9092853	-1.9669049
A_64_P048854	0.011238737	down	3.8954625	-3.8954625	-1.9617946		Rattus norvegicus similar to CG17660-PA (LOC366170), mRNA [XM_345422]
A_64_P050802	0.0047620037	down	3.892152	-3.892152	-1.9605681	Syngr3	Rattus norvegicus synaptogyrin 3 (Syngr3), mRNA [NM_001106985]
A_64_P049336	0.026425121	up	3.866166	3.866166	1.9509037
A_64_P012957	0.005280323	down	3.8660097	-3.8660097	-1.9508452	Tectb	Rattus norvegicus tectorin beta (Tectb), mRNA [NM_001106200]
A_43_P13971	0.035903033	down	3.8444917	-3.8444917	-1.9427929	Sdcbp	Rattus norvegicus syndecan binding protein (Sdcbp), mRNA [NM_031986]
A_44_P668137	0.005243554	down	3.8433867	-3.8433867	-1.942378	Sf3a1	Rattus norvegicus splicing factor 3a, subunit 1 (Sf3a1), mRNA [NM_001107235]
A_64_P153901	0.02546578	down	3.8323917	-3.8323917	-1.938245		Rattus norvegicus similar to ets variant gene 5 (LOC294776), mRNA [XM_226808]
A_44_P306156	0.0324025	down	3.8284404	-3.8284404	-1.9367567	Ccdc66	PREDICTED: Rattus norvegicus coiled-coil domain containing 66 (Ccdc66), transcript variant X11, mRNA [XM_006222086]
A_44_P449764	0.029999306	down	3.8102915	-3.8102915	-1.9299014	Gria3	Rattus norvegicus glutamate ionotropic receptor AMPA type subunit 3 (Gria3), transcript variant 1, mRNA [NM_032990]
A_64_P009255	0.03266997	down	3.8098695	-3.8098695	-1.9297416	Foxs1	Rattus norvegicus forkhead box S1 (Foxs1), mRNA [NM_001012091]
A_64_P002809	0.037962317	down	3.8061454	-3.8061454	-1.9283307	Grhl1	PREDICTED: Rattus norvegicus grainyhead-like transcription factor 1 (Grhl1), transcript variant X1, mRNA [XM_234006]
A_64_P160255	0.005168429	down	3.7997444	-3.7997444	-1.9259024	Zfp870	Rattus norvegicus zinc finger protein 870 (Zfp870), mRNA [NM_001163062]
A_44_P504192	0.020414885	down	3.7968345	-3.7968345	-1.924797	Chst2	carbohydrate sulfotransferase 2 [Source:RGD Symbol;Acc:1306988] [ENSRNOT00000075305]
A_64_P112170	0.027115932	down	3.7943888	-3.7943888	-1.9238675	Ly49si2	Rattus norvegicus immunoreceptor Ly49si2 (Ly49si2), mRNA [NM_001009498]
A_64_P129563	0.019288184	down	3.793052	-3.793052	-1.9233592	Arid5a	Rattus norvegicus AT-rich interaction domain 5A (Arid5a), mRNA [NM_001034934]
A_42_P596942	0.019664977	down	3.7860687	-3.7860687	-1.9207006	Filip1	Rattus norvegicus filamin A interacting protein 1 (Filip1), mRNA [NM_145682]
A_44_P520441	0.014630699	down	3.7819033	-3.7819033	-1.9191124	Pcdh9	Rattus norvegicus protocadherin 9 (Pcdh9), mRNA [NM_001191688]
A_64_P096157	0.021644402	down	3.766358	-3.766358	-1.9131701	Cux1	cut-like homeobox 1 [Source:RGD Symbol;Acc:620618] [ENSRNOT00000059486]
A_64_P034744	0.009894475	down	3.7641957	-3.7641957	-1.9123416	Acrbp	Rattus norvegicus acrosin binding protein (Acrbp), mRNA [NM_001025049]
A_64_P041219	0.028458517	down	3.6692693	-3.6692693	-1.8754928	Pcsk1	Rattus norvegicus proprotein convertase subtilisin/kexin type 1 (Pcsk1), mRNA [NM_017091]
A_64_P091799	0.009659014	down	3.662193	-3.662193	-1.8727078
A_44_P179956	0.03835999	up	3.6620545	3.6620545	1.8726532	Igtp	interferon gamma induced GTPase [Source:RGD Symbol;Acc:1306896] [ENSRNOT00000039335]
A_64_P039427	0.005453764	down	3.6544237	-3.6544237	-1.8696439
A_44_P517650	0.049093395	down	3.632368	-3.632368	-1.8609104	Adam17	Rattus norvegicus ADAM metallopeptidase domain 17 (Adam17), mRNA [NM_020306]
A_64_P007462	0.03835937	up	3.6270127	3.6270127	1.8587818	Spcs3	Rattus norvegicus signal peptidase complex subunit 3 (Spcs3), mRNA [NM_001191073]
A_43_P10757	0.031155914	down	3.6023586	-3.6023586	-1.8489418	Fam122b	Rattus norvegicus family with sequence similarity 122B (Fam122b), mRNA [NM_001166586]
A_64_P074465	0.032057334	down	3.6021204	-3.6021204	-1.8488464	Akap13	Rattus norvegicus A-kinase anchoring protein 13 (Akap13), mRNA [NM_001106271]
A_44_P390995	0.046230305	down	3.5965915	-3.5965915	-1.8466302	Tmod1	Rattus norvegicus tropomodulin 1 (Tmod1), mRNA [NM_013044]
A_64_P099886	0.020640127	down	3.5918984	-3.5918984	-1.8447466	Vegfa	Rattus norvegicus vascular endothelial growth factor A (Vegfa), transcript variant 1, mRNA [NM_001287107]
A_64_P154024	0.010290136	down	3.5793605	-3.5793605	-1.8397018	Ret	Rattus norvegicus ret proto-oncogene (Ret), transcript variant 2, mRNA [NM_001110099]
A_64_P157559	0.017138036	down	3.5776887	-3.5776887	-1.8390279	RGD1560028	Rattus norvegicus similar to RIKEN cDNA C130060K24 gene (RGD1560028), mRNA [NM_001109239]
A_44_P523853	0.00468659	down	3.5761123	-3.5761123	-1.838392	Pygm	Rattus norvegicus glycogen phosphorylase, muscle associated (Pygm), mRNA [NM_012638]
A_64_P032342	0.031613894	down	3.5635564	-3.5635564	-1.8333178	LOC102547645	PREDICTED: Rattus norvegicus transmembrane protein 217-like (LOC102547645), transcript variant X2, mRNA [XM_017588042]
A_64_P045755	0.0067081493	down	3.546207	-3.546207	-1.8262767
A_64_P154424	0.037695654	up	3.5456083	3.5456083	1.8260331		histone H4 variant H4-v.1 [Source:RGD Symbol;Acc:1562378] [ENSRNOT00000088408]
A_43_P22556	0.0051153875	up	3.5263824	3.5263824	1.8181889	Cidea	Rattus norvegicus cell death-inducing DFFA-like effector a (Cidea), mRNA [NM_001170467]
A_44_P227221	0.021396445	down	3.4974976	-3.4974976	-1.806323	Syde2	Rattus norvegicus synapse defective Rho GTPase homolog 2 (Syde2), mRNA [NM_001305229]
A_64_P093068	0.009652873	down	3.4932058	-3.4932058	-1.8045516	Map1lc3b	microtubule-associated protein 1 light chain 3 beta [Source:RGD Symbol;Acc:621315] [ENSRNOT00000051352]
A_64_P042925	0.029679524	up	3.49255	3.49255	1.8042808	Abca16	ATP-binding cassette, subfamily A (ABC1), member 16 [Source:RGD Symbol;Acc:1563534] [ENSRNOT00000001933]
A_44_P517896	0.019222429	up	3.4916935	3.4916935	1.803927	Hsd17b12	Rattus norvegicus hydroxysteroid (17-beta) dehydrogenase 12 (Hsd17b12), mRNA [NM_032066]
A_64_P082793	0.013150089	down	3.479267	-3.479267	-1.7987833	LOC690319	PREDICTED: Rattus norvegicus similar to Alpha-1-antitrypsin-related protein precursor (LOC690319), mRNA [XM_001074075]
A_64_P106553	0.035562236	down	3.4789941	-3.4789941	-1.7986702
A_64_P105988	0.0051643164	down	3.4759817	-3.4759817	-1.7974205	Mcpt1l3	mast cell protease 1-like 3 [Source:RGD Symbol;Acc:1302933] [ENSRNOT00000045948]
A_64_P070448	0.0069052246	down	3.4694726	-3.4694726	-1.7947164	Nxph3	neurexophilin 3 [Source:RGD Symbol;Acc:620693] [ENSRNOT00000007133]
A_64_P060125	0.010014618	down	3.468647	-3.468647	-1.794373		PREDICTED: Rattus norvegicus uncharacterized LOC310880 (RGD1305834), mRNA [XM_227717]
A_44_P114788	0.022586975	down	3.4665043	-3.4665043	-1.7934816		ADAM metallopeptidase with thrombospondin type 1 motif, 8 [Source:RGD Symbol;Acc:1308511] [ENSRNOT00000007358]
A_64_P080439	0.02287456	down	3.462572	-3.462572	-1.7918441	Hoxb4	Rattus norvegicus homeo box B4 (Hoxb4), mRNA [NM_001100787]
A_64_P130221	0.0072192173	up	3.45952	3.45952	1.7905719	C2cd4b	C2 calcium-dependent domain containing 4B [Source:RGD Symbol;Acc:1591932] [ENSRNOT00000012048]
A_64_P085530	0.014844862	down	3.4561765	-3.4561765	-1.7891768	Scd	Rattus norvegicus stearoyl-CoA desaturase (Scd), mRNA [NM_139192]
A_44_P508711	0.030570893	up	3.4534526	3.4534526	1.7880394	Flad1	Rattus norvegicus flavin adenine dinucleotide synthetase 1 (Flad1), mRNA [NM_001110138]
A_44_P355850	0.025731504	down	3.4464412	-3.4464412	-1.7851074	Coro6	Rattus norvegicus coronin 6 (Coro6), mRNA [NM_139115]
A_64_P075997	0.048262615	down	3.4398274	-3.4398274	-1.7823361	Aplf	Rattus norvegicus aprataxin and PNKP like factor (Aplf), mRNA [NM_001173382]
A_64_P067525	0.0059548006	up	3.4158337	3.4158337	1.7722378	Eno1	Rattus norvegicus enolase 1, alpha (Eno1), mRNA [NM_012554]
A_44_P158768	0.0076311473	down	3.4156148	-3.4156148	-1.7721453	Supt5h	Rattus norvegicus SPT5 homolog, DSIF elongation factor subunit (Supt5h), mRNA [NM_001107497]
A_44_P135082	0.024850363	down	3.408439	-3.408439	-1.7691112	P2rx1	Rattus norvegicus purinergic receptor P2X 1 (P2rx1), transcript variant 1, mRNA [NM_012997]
A_64_P016928	0.01569486	up	3.3962927	3.3962927	1.7639607
A_64_P105078	0.04098119	up	3.3887117	3.3887117	1.7607368	Kcnma1	Rattus norvegicus potassium calcium-activated channel subfamily M alpha 1 (Kcnma1), mRNA [NM_031828]
A_44_P403410	0.011143864	down	3.3709495	-3.3709495	-1.753155	Rbfox2	Rattus norvegicus RNA binding protein, fox-1 homolog 2 (Rbfox2), mRNA [NM_001079895]
A_64_P105254	0.016594691	up	3.3610497	3.3610497	1.7489119
A_64_P067070	0.039382417	down	3.355953	-3.355953	-1.7467225	Pwwp2a	PREDICTED: Rattus norvegicus PWWP domain containing 2A (Pwwp2a), transcript variant X1, mRNA [XM_006246135]
A_64_P134032	0.026548823	up	3.3397605	3.3397605	1.7397447
A_44_P483360	0.026308531	down	3.336332	-3.336332	-1.7382629	Nrip3	Rattus norvegicus nuclear receptor interacting protein 3 (Nrip3), mRNA [NM_001108498]
A_44_P253208	0.021949563	down	3.333489	-3.333489	-1.7370329	Adamts9	Rattus norvegicus ADAM metallopeptidase with thrombospondin type 1 motif, 9 (Adamts9), mRNA [NM_001107877]
A_64_P110759	0.021063829	up	3.3316538	3.3316538	1.7362385
A_64_P120709	0.02377967	down	3.3244462	-3.3244462	-1.733114	Ralgapa1	Rattus norvegicus Ral GTPase activating protein catalytic alpha subunit 1 (Ralgapa1), mRNA [NM_020083]
A_64_P154744	0.0073969495	down	3.319986	-3.319986	-1.7311772
A_64_P057877	0.009236286	down	3.3108857	-3.3108857	-1.7272172	Aatk	Rattus norvegicus apoptosis-associated tyrosine kinase (Aatk), mRNA [NM_001168703]
A_44_P653193	0.020925393	down	3.2968788	-3.2968788	-1.7211008	Dtx1	PREDICTED: Rattus norvegicus deltex E3 ubiquitin ligase 1 (Dtx1), transcript variant X2, mRNA [XM_001076559]
A_64_P124838	0.010786521	down	3.2843196	-3.2843196	-1.7155945	Prr5l	Rattus norvegicus proline rich 5 like (Prr5l), mRNA [NM_001080150]
A_42_P836526	0.017767033	down	3.283576	-3.283576	-1.7152678	Cul3	Rattus norvegicus cullin 3 (Cul3), mRNA [NM_001106923]
A_64_P146216	0.014205326	down	3.2826104	-3.2826104	-1.7148435	Clec12b	Rattus norvegicus C-type lectin domain family 12, member B (Clec12b), mRNA [NM_001109353]
A_64_P038437	0.041966647	down	3.2710602	-3.2710602	-1.7097583	Reck	reversion-inducing-cysteine-rich protein with kazal motifs [Source:RGD Symbol;Acc:1308845] [ENSRNOT00000084031]
A_43_P12743	0.047882967	down	3.2659826	-3.2659826	-1.7075171	Atp7a	Rattus norvegicus ATPase copper transporting alpha (Atp7a), mRNA [NM_052803]
A_64_P065086	0.00946712	down	3.2519298	-3.2519298	-1.7012961
A_64_P102039	0.0105955945	down	3.2426002	-3.2426002	-1.6971512	LOC367381	AMGNNUC:NRHY5-00396-F2-A W Rat hypothalamus (10471) Rattus norvegicus cDNA clone nrhy5-00396-f2 5', mRNA sequence [CB783299]
A_64_P009996	0.011875555	down	3.235795	-3.235795	-1.6941202	Tac1	Rattus norvegicus tachykinin, precursor 1 (Tac1), transcript variant 3, mRNA [NM_001124769]
A_64_P078050	0.008261103	down	3.2351153	-3.2351153	-1.6938171	RGD1559908	PREDICTED: Rattus norvegicus similar to hypothetical protein (RGD1559908), transcript variant X2, mRNA [XM_008773927]
A_64_P149764	0.014732643	down	3.2311397	-3.2311397	-1.6920431	Fam184a	family with sequence similarity 184, member A [Source:RGD Symbol;Acc:1311294] [ENSRNOT00000000475]
[truncated: 287 more rows]

## Sheet: TiO2NPs Liver
ProbeName	p value	Regulation	FC (abs)	FC	Log FC	GeneSymbol	Description
[truncated: 821 more rows]

[truncated: 1 more sheets: TiO2NPs Kidney]
