# Supplementary material for: Gold and titania nanoparticles accumulated in the body induce late toxic effects and alterations in transcriptional and miRNA landscape
Source: Royal Society of Chemistry journal article supplement (doi:10.1039/d3en00954h), 2024-01-01
Supplement: d3en00954h11.xlsx [file d3en00954h11.xlsx]

## Sheet: Lung
LUNG		AuNPs				TiO2NPs
ProbeName	Regulation	p value	FC (abs)	FC	Log FC	p value	FC (abs)	FC	Log FC	GeneSymbol	Description
A_64_P057824	down	0.007227671	2.7092507	-2.7092507	-1.4378939	0.0014785329	6.2982106	-6.2982106	-2.654942	Vom2r72	Rattus norvegicus vomeronasal 2 receptor, 72 (Vom2r72), mRNA [NM_001099517]
A_64_P085530	down	0.0020795015	4.445651	-4.445651	-2.1523948	0.014844862	3.4561765	-3.4561765	-1.7891768	Scd	Rattus norvegicus stearoyl-CoA desaturase (Scd), mRNA [NM_139192]
A_42_P548410	up					0.009401557	10.642332	10.642332	3.4117424	Acot1	Rattus norvegicus acyl-CoA thioesterase 1 (Acot1), mRNA [NM_031315]
A_44_P1084096	up	0.0039692544	5.0610285	5.0610285	2.3394306					Acot1	Rattus norvegicus acyl-CoA thioesterase 1 (Acot1), mRNA [NM_031315]
A_64_P056583	up					0.03395389	2.4645119	2.4645119	1.301302	Rhbdl3	Rattus norvegicus rhomboid like 3 (Rhbdl3), mRNA [NM_001105819]
A_44_P961164	up	0.038324438	2.21318	2.21318	1.1461208					Rhbdl3	Rattus norvegicus rhomboid like 3 (Rhbdl3), mRNA [NM_001105819]

## Sheet: Liver 
LIVER	AuNPs					TiO2NPs
ProbeName	Regulation	p value	FC (abs)	FC	Log FC	Regulation	p value	FC (abs)	FC	Log FC	GeneSymbol	Description
A_64_P091935	down	6.074714E-4	38.399693	-38.399693	-5.263023	down	7.075807E-5	14.608395	-14.608395	-3.8687258	Scd4	stearoyl-coenzyme A desaturase 4 [Source:RGD Symbol;Acc:1563648] [ENSRNOT00000017834]
A_64_P085530	down	5.715431E-4	103.52201	-103.52201	-6.693794	down	5.66275E-4	12.400801	-12.400801	-3.6323614	Scd	Rattus norvegicus stearoyl-CoA desaturase (Scd), mRNA [NM_139192]
A_64_P154537	down	0.002752961	19.565361	-19.565361	-4.29023	down	0.0014215274	12.090101	-12.090101	-3.5957544	LOC681458	similar to stearoyl-coenzyme A desaturase 3 [Source:RGD Symbol;Acc:1595370] [ENSRNOT00000018090]
A_42_P836392	down	0.002253427	56.69796	-56.69796	-5.825225	down	0.00355856	10.411635	-10.411635	-3.3801248	Elovl6	Rattus norvegicus ELOVL fatty acid elongase 6 (Elovl6), mRNA [NM_134383]
A_42_P585995	up	0.009773658	8.996091	8.996091	3.1692982	up	0.005298617	10.027116	10.027116	3.3258348	Nim1k	NIM1 serine/threonine protein kinase [Source:RGD Symbol;Acc:1308116] [ENSRNOT00000021964]
A_44_P235978	down	5.016456E-5	36.966965	-36.966965	-5.2081647	down	0.0012645994	6.813335	-6.813335	-2.768361	Fasn	Rattus norvegicus fatty acid synthase (Fasn), mRNA [NM_017332]
A_64_P023018	up	0.0030231054	3.8525321	3.8525321	1.945807	up	1.9225439E-4	6.1651864	6.1651864	2.6241446	Gask1a	PREDICTED: Rattus norvegicus family with sequence similarity 198, member A (Fam198a), mRNA [XM_001078210]
A_42_P473398	down	0.0017999172	30.546612	-30.546612	-4.9329405	down	0.040006638	6.1276274	-6.1276274	-2.6153286	Cxcl1	Rattus norvegicus C-X-C motif chemokine ligand 1 (Cxcl1), mRNA [NM_030845]
A_64_P029377	up	0.024190333	2.4900613	2.4900613	1.3161812	up	5.9424714E-5	5.2185307	5.2185307	2.3836436	Hrh4	Rattus norvegicus histamine receptor H4 (Hrh4), mRNA [NM_131909]
A_64_P131086	up	7.902144E-4	11.960808	11.960808	3.5802429	up	0.011435471	5.2157645	5.2157645	2.3828788	Rab30	Rattus norvegicus RAB30, member RAS oncogene family (Rab30), mRNA [NM_001015012]
A_64_P026943	down	9.303818E-5	14.183023	-14.183023	-3.8260932	down	0.0035275265	5.136744	-5.136744	-2.3608541	Gck	Rattus norvegicus glucokinase (Gck), transcript variant 1, mRNA [NM_001270849]
A_64_P085112	down	2.7647874E-4	12.576573	-12.576573	-3.652667	down	0.0011229714	4.9116035	-4.9116035	-2.296194	Acly	Rattus norvegicus ATP citrate lyase (Acly), transcript variant 1, mRNA [NM_016987]
A_42_P792817	down	0.04468154	4.1613913	-4.1613913	-2.057066	down	0.0140020745	4.790628	-4.790628	-2.2602148	Me1	Rattus norvegicus malic enzyme 1, NADP(+)-dependent, cytosolic (Me1), mRNA [NM_012600]
A_44_P175364	up	0.0400384	2.6888251	2.6888251	1.426976	up	4.4113278E-4	4.7754784	4.7754784	2.2556453	Mafb	Rattus norvegicus MAF bZIP transcription factor B (Mafb), mRNA [NM_019316]
A_44_P496643	down	4.0025573E-4	18.037033	-18.037033	-4.17289	down	0.0021675397	4.7729435	-4.7729435	-2.2548792
A_42_P589190	down	0.022428278	5.6103435	-5.6103435	-2.488089	down	0.010119555	4.3689227	-4.3689227	-2.1272776	Aacs	Rattus norvegicus acetoacetyl-CoA synthetase (Aacs), mRNA [NM_023104]
A_44_P1011780	up	1.841307E-4	7.521099	7.521099	2.9109435	up	0.0011262123	4.364275	4.364275	2.125742	Pla2g12a	Rattus norvegicus phospholipase A2, group XIIA (Pla2g12a), mRNA [NM_001108565]
A_43_P11520	down	5.7825644E-4	10.509006	-10.509006	-3.3935542	down	0.007954391	4.36271	-4.36271	-2.1252246	Thrsp	Rattus norvegicus thyroid hormone responsive (Thrsp), mRNA [NM_012703]
A_44_P357870	up	2.4388358E-4	4.7638125	4.7638125	2.2521167	up	0.010477566	4.3266215	4.3266215	2.113241	Cpt1a	Rattus norvegicus carnitine palmitoyltransferase 1A (Cpt1a), mRNA [NM_031559]
A_44_P362981	down	3.6887935E-4	19.554247	-19.554247	-4.28941	down	0.0025121581	4.073664	-4.073664	-2.0263271	Fabp5	Rattus norvegicus fatty acid binding protein 5, epidermal (Fabp5), mRNA [NM_145878]
A_44_P388973	up	5.302354E-4	4.286497	4.286497	2.0997992	up	0.026178075	3.9595757	3.9595757	1.9853458	Got1	Rattus norvegicus glutamic-oxaloacetic transaminase 1 (Got1), mRNA [NM_012571]
A_44_P1019604	down	0.027238274	4.555214	-4.555214	-2.1875188	down	7.8619417E-4	3.9365468	-3.9365468	-1.9769306	Ube2c	Rattus norvegicus ubiquitin-conjugating enzyme E2C (Ube2c), mRNA [NM_001106542]
A_64_P158940	up	1.0914166E-4	6.574105	6.574105	2.7167945	up	3.9809395E-4	3.815367	3.815367	1.9318218	Wsb1	Rattus norvegicus WD repeat and SOCS box-containing 1 (Wsb1), transcript variant 1, mRNA [NM_001042561]
A_64_P013243	down	6.771125E-4	13.643141	-13.643141	-3.770104	down	0.003940571	3.7570746	-3.7570746	-1.9096097		fatty acid-binding protein, epidermal pseudogene [Source:RGD Symbol;Acc:9111077] [ENSRNOT00000029774]
A_42_P794562	down	0.004472422	2.7118568	-2.7118568	-1.439281	down	0.0075727724	3.5848038	-3.5848038	-1.8418941	Cyp7a1	Rattus norvegicus cytochrome P450, family 7, subfamily a, polypeptide 1 (Cyp7a1), mRNA [NM_012942]
A_64_P091088	up	0.018669236	2.1009746	2.1009746	1.0710586	up	4.11791E-4	3.5719712	3.5719712	1.8367205	Fmo2	Rattus norvegicus flavin containing monooxygenase 2 (Fmo2), mRNA [NM_144737]
A_64_P079930	up	0.011565001	2.5386121	2.5386121	1.3440399	up	7.507917E-4	3.539179	3.539179	1.8234147	Tcf15	Rattus norvegicus transcription factor 15 (Tcf15), mRNA [NM_001168579]
A_64_P049423	up	2.3240584E-4	11.756207	11.756207	3.5553508	up	0.0054733395	3.5382705	3.5382705	1.8230443	Sds	Rattus norvegicus serine dehydratase (Sds), mRNA [NM_053962]
A_64_P023869	up	0.012777878	3.799973	3.799973	1.9259892	up	0.002852624	3.388377	3.388377	1.7605944	Hacl1	Rattus norvegicus 2-hydroxyacyl-CoA lyase 1 (Hacl1), mRNA [NM_053493]
A_42_P794613	down	3.485561E-4	9.533917	-9.533917	-3.2530692	down	0.0021318572	3.3109076	-3.3109076	-1.7272267	Mvd	Rattus norvegicus mevalonate diphosphate decarboxylase (Mvd), mRNA [NM_031062]
A_44_P104652	up	0.016662998	7.797325	7.797325	2.9629793	up	0.0064944187	3.2624342	3.2624342	1.7059488	Slc38a2	Rattus norvegicus solute carrier family 38, member 2 (Slc38a2), mRNA [NM_181090]
A_44_P517258	up	0.016900295	3.1146488	3.1146488	1.6390694	up	5.338614E-4	3.2198927	3.2198927	1.6870126	Pck1	Rattus norvegicus phosphoenolpyruvate carboxykinase 1 (Pck1), mRNA [NM_198780]
A_44_P326133	down	0.002258735	11.108992	-11.108992	-3.473656	down	0.0060125696	3.2127333	-3.2127333	-1.6838012		Rattus norvegicus similar to Fatty acid-binding protein, epidermal (E-FABP) (Cutaneous fatty acid-binding protein) (C-FABP) (DA11) (LOC296723), mRNA [XM_231258]
A_42_P580844	down	0.006713494	13.608542	-13.608542	-3.7664406	down	0.002507206	3.0166104	-3.0166104	-1.5929284	Cdk1	Rattus norvegicus cyclin-dependent kinase 1 (Cdk1), mRNA [NM_019296]
A_44_P431154	down	0.018428652	1.9326273	-1.9326273	-0.95056343	down	0.009787779	2.9569435	-2.9569435	-1.5641067	Zfp428	Rattus norvegicus zinc finger protein 428 (Zfp428), mRNA [NM_001108476]
A_64_P315172	up	0.035720218	1.9857613	1.9857613	0.9896922	up	0.009805258	2.9520478	2.9520478	1.5617161	Nat2	Rattus norvegicus N-acetyltransferase 2 (Nat2), mRNA [NM_053854]
A_42_P736812	down	0.0050212415	2.121865	-2.121865	-1.0853329	down	0.014734218	2.939826	-2.939826	-1.5557307	Cavin3	Rattus norvegicus protein kinase C, delta binding protein (Prkcdbp), mRNA [NM_134449]
A_64_P079503	up	0.0068465746	3.3472762	3.3472762	1.7429876	up	6.053255E-4	2.885813	2.885813	1.5289778	Noct	Rattus norvegicus nocturnin (Noct), mRNA [NM_138526]
A_64_P061765	up	0.020656155	2.0139568	2.0139568	1.0100327	up	0.026436731	2.8584735	2.8584735	1.515245	Fam89a	Rattus norvegicus family with sequence similarity 89, member A (Fam89a), mRNA [NM_001011711]
A_64_P231828	down	9.041691E-4	4.766172	-4.766172	-2.252831	down	0.009592918	2.8395343	-2.8395343	-1.5056543	Acaca	Rattus norvegicus acetyl-CoA carboxylase alpha (Acaca), mRNA [NM_022193]
A_64_P136362	up	0.015196933	2.156525	2.156525	1.1087084	up	0.002502386	2.827497	2.827497	1.4995254	Iba57	Rattus norvegicus IBA57 homolog, iron-sulfur cluster assembly (Iba57), mRNA [NM_001108827]
A_64_P059964	down	0.0077755987	3.225097	-3.225097	-1.6893425	down	0.0026028657	2.8161187	-2.8161187	-1.4937081	Tlcd1	Rattus norvegicus TLC domain containing 1 (Tlcd1), mRNA [NM_001013858]
A_44_P1022458	down	0.020620167	3.2255602	-3.2255602	-1.6895497	down	0.0014758925	2.77564	-2.77564	-1.4728204	Tubb6	Rattus norvegicus tubulin, beta 6 class V (Tubb6), mRNA [NM_001025675]
A_64_P123078	down	0.0074192313	4.3437047	-4.3437047	-2.118926	down	0.026363349	2.7479372	-2.7479372	-1.458349	Phgdh	Rattus norvegicus phosphoglycerate dehydrogenase (Phgdh), mRNA [NM_031620]
A_64_P104481	up	0.015054883	2.029692	2.029692	1.0212607	up	0.0020902322	2.740595	2.740595	1.4544892	Spag7	Rattus norvegicus sperm associated antigen 7 (Spag7), mRNA [NM_001107016]
A_44_P456599	up	0.008328319	2.875299	2.875299	1.5237119	up	0.019318836	2.6841254	2.6841254	1.4244521	Zdhhc23	zinc finger, DHHC-type containing 23 [Source:RGD Symbol;Acc:1303254] [ENSRNOT00000093325]
A_64_P058362	up	0.0121784415	3.0659344	3.0659344	1.6163268	up	0.0015409598	2.6617172	2.6617172	1.4123572		cytochrome P450, family 3, subfamily a, polypeptide 85, pseudogene [Source:RGD Symbol;Acc:1595706] [ENSRNOT00000085436]
A_44_P1042711	down	0.012424471	4.690433	-4.690433	-2.229721	down	0.0037539203	2.6613026	-2.6613026	-1.4121325	Kif20a	Rattus norvegicus kinesin family member 20A (Kif20a), mRNA [NM_001108426]
A_42_P843603	down	0.0010173727	4.1698093	-4.1698093	-2.0599813	down	0.0018744502	2.6528873	-2.6528873	-1.4075634	Tk1	Rattus norvegicus thymidine kinase 1 (Tk1), mRNA [NM_052800]
A_64_P003094	down	0.017926784	1.7397443	-1.7397443	-0.7988753	down	0.0018396404	2.6373057	-2.6373057	-1.3990648
A_44_P143922	down	0.00220881	3.9703178	-3.9703178	-1.9892545	down	0.0048636794	2.6179452	-2.6179452	-1.3884349	Hes6	Rattus norvegicus hes family bHLH transcription factor 6 (Hes6), mRNA [NM_001013179]
A_64_P054251	up	0.016212422	1.9565343	1.9565343	0.96830034	up	0.0025185081	2.6151526	2.6151526	1.3868951	Pax3	Rattus norvegicus paired box 3 (Pax3), mRNA [NM_053710]
A_64_P092026	down	1.0605197E-4	8.670048	-8.670048	-3.11604	down	0.0070865764	2.5921814	-2.5921814	-1.3741667	Bhlha15	Rattus norvegicus basic helix-loop-helix family, member a15 (Bhlha15), mRNA [NM_012863]
A_43_P13064	up	0.013877249	2.2094696	2.2094696	1.1437	up	0.0016795305	2.5598183	2.5598183	1.3560414	Klf9	Rattus norvegicus Kruppel-like factor 9 (Klf9), mRNA [NM_057211]
A_42_P576823	down	0.033015653	4.0489144	-4.0489144	-2.0175352	down	0.0036874446	2.5376356	-2.5376356	-1.3434849	Mki67	Rattus norvegicus marker of proliferation Ki-67 (Mki67), mRNA [NM_001271366]
A_64_P126508	down	0.001036675	8.055721	-8.055721	-3.0100138	down	0.012253805	2.5348186	-2.5348186	-1.3418825	Lss	Rattus norvegicus lanosterol synthase (Lss), mRNA [NM_031049]
A_43_P12589	down	0.020571066	3.6843476	-3.6843476	-1.8814092	down	0.014877378	2.5260887	-2.5260887	-1.3369052	Epha3	Rattus norvegicus Eph receptor A3 (Epha3), mRNA [NM_031564]
A_64_P130683	down	8.9919666E-4	7.85965	-7.85965	-2.9744651	down	0.024079813	2.5013041	-2.5013041	-1.3226805	Acss2	Rattus norvegicus acyl-CoA synthetase short-chain family member 2 (Acss2), mRNA [NM_001107793]
A_43_P14036	down	0.006824385	2.8385584	-2.8385584	-1.5051584	down	0.009119302	2.4987895	-2.4987895	-1.3212293	Ifi27l2b	Rattus norvegicus interferon, alpha-inducible protein 27 like 2B (Ifi27l2b), mRNA [NM_206846]
A_42_P602724	down	9.7485865E-4	4.3150306	-4.3150306	-2.1093707	down	0.013292803	2.4837837	-2.4837837	-1.3125396	Ubd	Rattus norvegicus ubiquitin D (Ubd), mRNA [NM_053299]
A_44_P387780	up	0.0028529041	3.6028695	3.6028695	1.8491464	up	0.034630325	2.4520464	2.4520464	1.2939862	Cyp8b1	Rattus norvegicus cytochrome P450, family 8, subfamily b, polypeptide 1 (Cyp8b1), mRNA [NM_031241]
A_64_P046268	up	0.0035418444	4.1150937	4.1150937	2.0409253	up	0.0020741047	2.442535	2.442535	1.2883792	Cish	Rattus norvegicus cytokine inducible SH2-containing protein (Cish), mRNA [NM_031804]
A_64_P161838	down	1.4046372E-4	5.915266	-5.915266	-2.564443	down	0.007853064	2.4234426	-2.4234426	-1.2770579	Snai2	Rattus norvegicus snail family transcriptional repressor 2 (Snai2), mRNA [NM_013035]
A_64_P091243	up	0.009099867	1.944402	1.944402	0.9593265	up	0.04356526	2.4220436	2.4220436	1.2762249	Faxdc2	PREDICTED: Rattus norvegicus fatty acid hydroxylase domain containing 2 (Faxdc2), mRNA [XM_017597634]
A_64_P050303	down	0.01615234	14.273715	-14.273715	-3.835289	down	0.0069270027	2.3958325	-2.3958325	-1.260527	Spc25	Rattus norvegicus SPC25, NDC80 kinetochore complex component (Spc25), mRNA [NM_001009654]
A_64_P041223	down	0.009710151	2.0581744	-2.0581744	-1.0413651	down	0.0039936146	2.373672	-2.373672	-1.2471206	Creb3l1	Rattus norvegicus cAMP responsive element binding protein 3-like 1 (Creb3l1), mRNA [NM_001005562]
A_44_P135224	up	0.005109303	2.4617481	2.4617481	1.2996831	up	0.020905668	2.364339	2.364339	1.241437	Plk3	Rattus norvegicus polo-like kinase 3 (Plk3), mRNA [NM_022187]
A_44_P360772	down	0.046927463	1.7517332	-1.7517332	-0.80878305	down	0.04520483	2.3530643	-2.3530643	-1.2345407	Tagln	Rattus norvegicus transgelin (Tagln), mRNA [NM_031549]
A_42_P826115	down	0.04949933	2.4466965	-2.4466965	-1.2908351	down	0.0049201585	2.347877	-2.347877	-1.2313569	Sapcd2	Rattus norvegicus suppressor APC domain containing 2 (Sapcd2), mRNA [NM_001109418]
A_64_P096459	up	2.8629607E-4	4.3935213	4.3935213	2.1353776	up	0.038479213	2.3396053	2.3396053	1.2262652	Fbp2	Rattus norvegicus fructose-bisphosphatase 2 (Fbp2), mRNA [NM_053716]
A_42_P753215	down	0.027849361	2.7512674	-2.7512674	-1.4600964	down	0.041136928	2.328079	-2.328079	-1.2191399	Synj2	Rattus norvegicus synaptojanin 2 (Synj2), transcript variant 3, mRNA [NM_032071]
A_64_P064777	up	0.0257805	1.62145	1.62145	0.69728446	up	0.0034142942	2.281491	2.281491	1.1899769	Itpr2	Rattus norvegicus inositol 1,4,5-trisphosphate receptor, type 2 (Itpr2), mRNA [NM_031046]
A_42_P491454	down	0.03379403	2.5891962	-2.5891962	-1.3725042	down	0.0143783605	2.27015	-2.27015	-1.1827875	Gnat1	Rattus norvegicus G protein subunit alpha transducin 1 (Gnat1), mRNA [NM_001108780]
A_44_P463313	down	0.017547876	4.082544	-4.082544	-2.0294683	down	0.0028288148	2.2611184	-2.2611184	-1.1770365	Plk1	Rattus norvegicus polo-like kinase 1 (Plk1), mRNA [NM_017100]
A_64_P158653	down	0.011504303	10.464081	-10.464081	-3.3873737	down	0.043645468	2.2597277	-2.2597277	-1.1761489	Knstrn	Rattus norvegicus kinetochore-localized astrin/SPAG5 binding protein (Knstrn), mRNA [NM_001004264]
A_44_P1049865	up	0.045547068	1.9878023	1.9878023	0.9911742	up	0.013498093	2.2572644	2.2572644	1.1745753	Crot	Rattus norvegicus carnitine O-octanoyltransferase (Crot), mRNA [NM_031987]
A_64_P304049	up	0.0031116663	2.4708173	2.4708173	1.3049884	up	0.008722147	2.253642	2.253642	1.1722584	Pkib	Rattus norvegicus cAMP-dependent protein kinase inhibitor beta (Pkib), transcript variant 1, mRNA [NM_001076553]
A_64_P132852	up	0.016010989	3.048097	3.048097	1.6079087	up	0.008733016	2.2511592	2.2511592	1.170668	Insc	Rattus norvegicus inscuteable homolog (Drosophila) (Insc), mRNA [NM_001106285]
A_44_P226315	up	0.013624917	3.072573	3.072573	1.6194472	up	0.0038815408	2.243678	2.243678	1.1658657	Slc16a10	Rattus norvegicus solute carrier family 16 member 10 (Slc16a10), mRNA [NM_138831]
A_64_P121871	down	6.2327686E-4	4.818042	-4.818042	-2.268447	down	0.015186996	2.240897	-2.240897	-1.1640763	Pklr	Rattus norvegicus pyruvate kinase, liver and RBC (Pklr), mRNA [NM_012624]
A_44_P170527	up	0.003904811	2.2779176	2.2779176	1.1877155	up	0.031283364	2.2332797	2.2332797	1.159164	Fzd1	Rattus norvegicus frizzled class receptor 1 (Fzd1), mRNA [NM_021266]
A_44_P309202	up	0.0145374425	1.8643326	1.8643326	0.8986592	up	0.004278036	2.230725	2.230725	1.1575127	Slc25a22	Rattus norvegicus solute carrier family 25 member 22 (Slc25a22), mRNA [NM_001014027]
A_43_P17238	up	8.0202817E-4	5.637127	5.637127	2.49496	up	0.008170268	2.180554	2.180554	1.1246947	Rnd2	Rattus norvegicus Rho family GTPase 2 (Rnd2), mRNA [NM_001010953]
A_64_P001710	down	0.030451657	1.6881213	-1.6881213	-0.7554186	down	0.014517597	2.1798048	-2.1798048	-1.1241989	Mblac2	Rattus norvegicus metallo-beta-lactamase domain containing 2 (Mblac2), mRNA [NM_001108934]
A_42_P840460	up	0.0039453763	2.6601794	2.6601794	1.4115235	up	0.0031760717	2.178278	2.178278	1.123188	Spice1	Rattus norvegicus spindle and centriole associated protein 1 (Spice1), mRNA [NM_001008285]
A_44_P358440	down	0.010471254	7.4953833	-7.4953833	-2.9060023	down	0.0058012432	2.1684804	-2.1684804	-1.1166844	Nat8f3	N-acetyltransferase 8 (GCN5-related) family member 3 [Source:RGD Symbol;Acc:621607] [ENSRNOT00000021103]
A_44_P607486	up	0.006194118	2.0080624	2.0080624	1.0058041	up	0.0053183883	2.1637008	2.1637008	1.1135011	Foxn3	Rattus norvegicus forkhead box N3 (Foxn3), mRNA [NM_001108047]
A_64_P035062	up	0.013471381	2.002726	2.002726	1.001965	up	0.005024452	2.1596684	2.1596684	1.1108098	Rims3	Rattus norvegicus regulating synaptic membrane exocytosis 3 (Rims3), mRNA [NM_022931]
A_42_P654865	down	0.0025525733	2.8155463	-2.8155463	-1.4934149	down	0.004478308	2.156252	-2.156252	-1.1085258	Otub2	Rattus norvegicus OTU deubiquitinase, ubiquitin aldehyde binding 2 (Otub2), mRNA [NM_001108053]
A_64_P011894	up	0.008231136	2.5126593	2.5126593	1.329215	up	0.047412194	2.1544511	2.1544511	1.1073203	Xbp1	Rattus norvegicus X-box binding protein 1 (Xbp1), transcript variant 1, mRNA [NM_001004210]
A_43_P12437	up	0.023183137	1.7709717	1.7709717	0.8245411	up	0.017926631	2.1499588	2.1499588	1.1043091	Hhex	Rattus norvegicus hematopoietically expressed homeobox (Hhex), mRNA [NM_024385]
A_64_P025753	down	0.019248819	3.7013192	-3.7013192	-1.8880396	down	0.005349769	2.1457152	-2.1457152	-1.1014587	Bub1	Rattus norvegicus BUB1 mitotic checkpoint serine/threonine kinase (Bub1), mRNA [NM_001106507]
A_44_P544661	up	0.0054685567	3.6881807	3.6881807	1.8829093	up	0.015457176	2.1423626	2.1423626	1.0992026	Cyp3a2	Rattus norvegicus cytochrome P450, family 3, subfamily a, polypeptide 2 (Cyp3a2), mRNA [NM_153312]
A_42_P641234	down	0.042233177	2.7090993	-2.7090993	-1.4378133	down	0.031507246	2.1085591	-2.1085591	-1.0762575	Snrpa	Rattus norvegicus small nuclear ribonucleoprotein polypeptide A (Snrpa), mRNA [NM_001008303]
A_42_P604900	up	0.0024437357	2.5245962	2.5245962	1.3360527	up	0.034720536	2.081471	2.081471	1.0576035	Cbx7	Rattus norvegicus chromobox 7 (Cbx7), mRNA [NM_199117]
A_64_P159448	down	4.6625125E-4	8.918652	-8.918652	-3.1568255	down	0.01438709	2.065879	-2.065879	-1.0467558
A_44_P174374	down	0.007846574	2.1090767	-2.1090767	-1.0766115	down	0.01129217	2.0554483	-2.0554483	-1.039453	Ephx1	Rattus norvegicus epoxide hydrolase 1 (Ephx1), transcript variant 2, mRNA [NM_012844]
A_64_P135229	up	0.019284368	1.7820945	1.7820945	0.8335738	up	0.007463531	2.0419936	2.0419936	1.0299784	Nrbf2	Rattus norvegicus nuclear receptor binding factor 2 (Nrbf2), mRNA [NM_022186]
A_64_P017766	up	0.009803848	2.1301777	2.1301777	1.0909739	up	0.011319178	2.0379467	2.0379467	1.0271163	Scml4	Rattus norvegicus sex comb on midleg-like 4 (Drosophila) (Scml4), mRNA [NM_001107638]
A_64_P164255	up	0.01855271	1.8569633	1.8569633	0.8929453	up	0.012041668	2.0282688	2.0282688	1.0202489	Hivep3	Rattus norvegicus human immunodeficiency virus type I enhancer binding protein 3 (Hivep3), mRNA [NM_001107972]
A_64_P110599	up	0.0153248105	1.7861376	1.7861376	0.8368432	up	0.0149186915	2.0253966	2.0253966	1.0182045	Plekhf1	Rattus norvegicus pleckstrin homology and FYVE domain containing 1 (Plekhf1), mRNA [NM_001013148]
A_44_P164101	up	0.02815206	1.9648161	1.9648161	0.97439426	up	0.023857025	2.024797	2.024797	1.0177772	Mettl7a	Rattus norvegicus methyltransferase like 7A (Mettl7a), mRNA [NM_001037355]
A_64_P098921	down	0.010555597	9.773154	-9.773154	-3.2888243	down	0.03477848	2.017312	-2.017312	-1.0124342	Cdca3	Rattus norvegicus cell division cycle associated 3 (Cdca3), mRNA [NM_001007648]
A_64_P243897	down	0.004430938	2.9123695	-2.9123695	-1.5421934	down	0.009022209	2.010366	-2.010366	-1.0074581	Phf11	Rattus norvegicus PHD finger protein 11 (Phf11), mRNA [NM_001024272]
A_44_P1028549	down	0.0073163346	2.0588791	-2.0588791	-1.0418591	down	0.018534485	2.0080361	-2.0080361	-1.0057852	Casp4	Rattus norvegicus caspase 4 (Casp4), mRNA [NM_053736]
A_64_P147187	down	7.426592E-4	9.714803	-9.714803	-3.2801847	down	0.017951299	2.007944	-2.007944	-1.0057191
A_64_P084538	down	0.0026099153	2.6331959	-2.6331959	-1.3968148	down	0.031230241	2.0037456	-2.0037456	-1.0026993	Tjp3	Rattus norvegicus tight junction protein 3 (Tjp3), mRNA [NM_001108073]
A_44_P560952	up	0.0249399	1.8659616	1.8659616	0.8999193	up	0.018715411	1.9996543	1.9996543	0.9997506	Scamp1	Rattus norvegicus secretory carrier membrane protein 1 (Scamp1), mRNA [NM_001100636]
A_44_P543017	up	0.044173576	1.9542063	1.9542063	0.9665828	up	0.026603263	1.9862158	1.9862158	0.99002236	Nhlrc1	Rattus norvegicus NHL repeat containing E3 ubiquitin protein ligase 1 (Nhlrc1), mRNA [NM_199236]
A_44_P301963	down	0.008353082	2.274662	-2.274662	-1.1856521	down	0.0074984436	1.9694024	-1.9694024	-0.97775793	Psmb9	Rattus norvegicus proteasome subunit beta 9 (Psmb9), mRNA [NM_012708]
A_42_P526030	up	0.0024902374	2.522082	2.522082	1.3346152	up	0.018475007	1.9594172	1.9594172	0.9704246	Decr1	Rattus norvegicus 2,4-dienoyl-CoA reductase 1 (Decr1), mRNA [NM_057197]
A_64_P023704	down	0.04057116	1.6136534	-1.6136534	-0.69033074	down	0.017995186	1.9543487	-1.9543487	-0.96668786	Dnm1l	Rattus norvegicus dynamin 1-like (Dnm1l), mRNA [NM_053655]
A_44_P512136	down	8.040359E-4	5.239415	-5.239415	-2.3894057	down	0.011680847	1.9527284	-1.9527284	-0.9654913	Dhcr7	Rattus norvegicus 7-dehydrocholesterol reductase (Dhcr7), mRNA [NM_022389]
A_44_P231243	up	0.01833123	2.2411659	2.2411659	1.1642494	up	0.026209025	1.94679	1.94679	0.96109724	Insig2	Rattus norvegicus insulin induced gene 2 (Insig2), mRNA [NM_178091]
A_42_P604121	down	0.0084686335	2.023692	-2.023692	-1.0169896	down	0.0070528416	1.9334815	-1.9334815	-0.9512009	Tfg	Rattus norvegicus Trk-fused gene (Tfg), mRNA [NM_001012144]
A_44_P358194	up	0.017821942	2.6864522	2.6864522	1.4257021	up	0.027688634	1.930941	1.930941	0.94930404	Fmo3	Rattus norvegicus flavin containing monooxygenase 3 (Fmo3), mRNA [NM_053433]
A_44_P173575	up	0.025393564	1.7762102	1.7762102	0.8288023	up	0.030348817	1.9157583	1.9157583	0.9379155	Rassf1	Rattus norvegicus Ras association domain family member 1 (Rassf1), transcript variant 2, mRNA [NM_001007754]
A_64_P378885	up	0.015187338	2.6615467	2.6615467	1.4122648	up	0.039182186	1.9127034	1.9127034	0.93561316	Amacr	Rattus norvegicus alpha-methylacyl-CoA racemase (Amacr), mRNA [NM_012816]
A_44_P242321	up	0.00201123	2.5585055	2.5585055	1.3553014	up	0.0132909985	1.9080586	1.9080586	0.9321055	Acaa2	Rattus norvegicus acetyl-CoA acyltransferase 2 (Acaa2), mRNA [NM_130433]
A_64_P079220	down	0.037475586	2.101608	-2.101608	-1.0714936	down	0.04761555	1.9077466	-1.9077466	-0.9318695	Gprin3	GPRIN family member 3 [Source:RGD Symbol;Acc:1565690] [ENSRNOT00000039316]
A_64_P014115	up	0.032236997	1.5753009	1.5753009	0.6556274	up	0.023653455	1.9007785	1.9007785	0.92659044	Diras1	Rattus norvegicus DIRAS family GTPase 1 (Diras1), mRNA [NM_001108987]
A_43_P18376	up	0.012616675	1.9862392	1.9862392	0.99003935	up	0.026052387	1.8984437	1.8984437	0.9248172	Tex49	Rattus norvegicus testis expressed 49 (Tex49), mRNA [NM_001134528]
A_64_P040245	down	0.0110135265	2.3719873	-2.3719873	-1.2460963	down	0.007696279	1.8911988	-1.8911988	-0.919301	Ndst1	Rattus norvegicus N-deacetylase and N-sulfotransferase 1 (Ndst1), mRNA [NM_024361]
A_44_P1048663	up	0.027192196	1.935715	1.935715	0.9528665	up	0.024373595	1.8901924	1.8901924	0.9185331	Ccnl1	Rattus norvegicus cyclin L1 (Ccnl1), mRNA [NM_053662]
A_42_P616485	up	0.03149914	2.6422358	2.6422358	1.4017591	up	0.042791624	1.8864998	1.8864998	0.9157119	RGD1563888	PREDICTED: Rattus norvegicus similar to DNA segment, Chr 16, ERATO Doi 472, expressed (RGD1563888), transcript variant X2, mRNA [XM_008768532]
A_64_P128313	down	0.044233713	1.7815468	-1.7815468	-0.8331304	down	0.032827497	1.8825728	-1.8825728	-0.9127056	Rtkn	Rattus norvegicus rhotekin (Rtkn), mRNA [NM_184046]
A_43_P15484	up	0.020544749	1.7683775	1.7683775	0.8224263	up	0.045693327	1.8795478	1.8795478	0.9103856	Pik3c2g	Rattus norvegicus phosphatidylinositol-4-phosphate 3-kinase, catalytic subunit type 2 gamma (Pik3c2g), mRNA [NM_053923]
A_44_P468468	up	0.016342627	2.3542786	2.3542786	1.235285	up	0.015406756	1.8794494	1.8794494	0.91031003	Lbp	Rattus norvegicus lipopolysaccharide binding protein (Lbp), mRNA [NM_017208]
A_43_P22542	down	0.0032270404	2.6453483	-2.6453483	-1.4034576	down	0.011014015	1.8765466	-1.8765466	-0.9080801	Nsdhl	Rattus norvegicus NAD(P) dependent steroid dehydrogenase-like (Nsdhl), mRNA [NM_001009399]
A_64_P059120	up	0.04130047	1.9868859	1.9868859	0.99050903	up	0.017965654	1.8601133	1.8601133	0.89539045	Aen	Rattus norvegicus apoptosis enhancing nuclease (Aen), mRNA [NM_001108487]
A_64_P128862	down	0.005418247	2.4872255	-2.4872255	-1.3145373	down	0.0136877755	1.8544189	-1.8544189	-0.89096713	Elovl5	Rattus norvegicus ELOVL fatty acid elongase 5 (Elovl5), mRNA [NM_134382]
A_42_P817417	up	7.6502806E-4	5.392802	5.392802	2.431035	up	0.014397272	1.8518369	1.8518369	0.888957	Pvr	Rattus norvegicus poliovirus receptor (PVR), mRNA [NM_017076]
A_44_P140557	down	0.021413108	2.264223	-2.264223	-1.1790161	down	0.0105953785	1.840248	-1.840248	-0.87990016	Dock6	Rattus norvegicus dedicator of cytokinesis 6 (Dock6), mRNA [NM_001108997]
A_43_P22351	up	0.02928168	1.6545712	1.6545712	0.72645736	up	0.010343146	1.8393389	1.8393389	0.8791873	Slc46a3	Rattus norvegicus solute carrier family 46, member 3 (Slc46a3), mRNA [NM_001024968]
A_64_P021750	up	0.02415203	2.990841	2.990841	1.5805511	up	0.01386187	1.8374496	1.8374496	0.8777046	Cyp3a23/3a1	Rattus norvegicus cytochrome P450, family 3, subfamily a, polypeptide 23/polypeptide 1 (Cyp3a23/3a1), mRNA [NM_013105]
A_64_P122238	down	0.008069608	2.4800406	-2.4800406	-1.3103637	down	0.040428888	1.8362207	-1.8362207	-0.8767395	Tuba4a	Rattus norvegicus tubulin, alpha 4A (Tuba4a), mRNA [NM_001007004]
A_43_P16457	down	0.027928732	2.3893816	-2.3893816	-1.2566373	down	0.024373481	1.8295617	-1.8295617	-0.87149805	Creld2	Rattus norvegicus cysteine-rich with EGF-like domains 2 (Creld2), mRNA [NM_001037208]
A_44_P409232	up	0.0015645667	4.3213215	4.3213215	2.1114726	up	0.023375183	1.8286464	1.8286464	0.8707761	Cyp2e1	Rattus norvegicus cytochrome P450, family 2, subfamily e, polypeptide 1 (Cyp2e1), mRNA [NM_031543]
A_44_P300506	down	0.005248423	2.8647094	-2.8647094	-1.5183887	down	0.02939434	1.8253379	-1.8253379	-0.8681635	Calr	Rattus norvegicus calreticulin (Calr), mRNA [NM_022399]
A_42_P823322	down	0.008424301	2.128941	-2.128941	-1.090136	down	0.028231965	1.8236971	-1.8236971	-0.8668661	Slc23a1	Rattus norvegicus solute carrier family 23 member 1 (Slc23a1), mRNA [NM_017315]
A_44_P653240	up	0.009049203	2.4620564	2.4620564	1.2998638	up	0.024861673	1.8235494	1.8235494	0.8667493	Eif4ebp3	Rattus norvegicus eukaryotic translation initiation factor 4E binding protein 3 (Eif4ebp3), mRNA [NM_001202552]
A_42_P723641	down	0.0061678216	3.7612295	-3.7612295	-1.9112043	down	0.015252805	1.8190229	-1.8190229	-0.8631637	Popdc2	Rattus norvegicus popeye domain containing 2 (Popdc2), mRNA [NM_199113]
A_44_P465188	down	2.0230118E-4	9.936986	-9.936986	-3.3128083	down	0.042980924	1.8170793	-1.8170793	-0.8616214	Fads1	Rattus norvegicus fatty acid desaturase 1 (Fads1), mRNA [NM_053445]
A_44_P178448	down	0.0010836037	4.8422136	-4.8422136	-2.2756667	down	0.042114586	1.8149862	-1.8149862	-0.8599586	Srebf1	Rattus norvegicus sterol regulatory element binding transcription factor 1 (Srebf1), transcript variant 1, mRNA [NM_001276707]
A_43_P13409	down	0.004608144	2.7299829	-2.7299829	-1.4488919	down	0.016227072	1.8147209	-1.8147209	-0.85974765	Zdhhc2	Rattus norvegicus zinc finger, DHHC-type containing 2 (Zdhhc2), mRNA [NM_145096]
A_44_P993914	up	0.007842982	2.2582328	2.2582328	1.1751943	up	0.048842926	1.8103874	1.8103874	0.8562984	Pdia5	Rattus norvegicus protein disulfide isomerase family A, member 5 (Pdia5), mRNA [NM_001014125]
A_64_P046373	down	0.002903859	4.3035827	-4.3035827	-2.1055381	down	0.01399714	1.8036712	-1.8036712	-0.8509364	Pycr1	PREDICTED: Rattus norvegicus pyrroline-5-carboxylate reductase 1 (Pycr1), transcript variant X1, mRNA [XM_008768473]
A_64_P024321	up	0.045211405	1.614479	1.614479	0.6910686	up	0.015026516	1.8023971	1.8023971	0.84991693	Sox5	Rattus norvegicus SRY box 5 (Sox5), mRNA [NM_001271267]
A_44_P258417	up	0.022565784	1.8097308	1.8097308	0.85577506	up	0.023079477	1.7956519	1.7956519	0.8445077	Mad2l1bp	Rattus norvegicus MAD2L1 binding protein (Mad2l1bp), mRNA [NM_001009699]
A_44_P316611	up	0.022210198	2.137273	2.137273	1.0957712	up	0.016400969	1.7913847	1.7913847	0.8410752	Pknox1	Rattus norvegicus PBX/knotted 1 homeobox 1 (Pknox1), mRNA [NM_001013074]
A_42_P687819	up	0.009208888	2.117501	2.117501	1.0823627	up	0.023425872	1.7858634	1.7858634	0.8366217	Atoh8	Rattus norvegicus atonal bHLH transcription factor 8 (Atoh8), mRNA [NM_001109241]
A_64_P132357	up	0.03502245	1.7959831	1.7959831	0.84477377	up	0.02387994	1.7742836	1.7742836	0.82723665	Gpat4	Rattus norvegicus glycerol-3-phosphate acyltransferase 4 (Gpat4), mRNA [NM_001047849]
A_64_P085053	down	0.01169417	2.2025197	-2.2025197	-1.1391549	down	0.03635174	1.773423	-1.773423	-0.82653666	Scly	Rattus norvegicus selenocysteine lyase (Scly), mRNA [NM_001007755]
A_64_P038419	down	0.006976839	2.2217796	-2.2217796	-1.1517156	down	0.021142712	1.7706907	-1.7706907	-0.8243122	Comt	Rattus norvegicus catechol-O-methyltransferase (Comt), mRNA [NM_012531]
A_64_P075769	down	0.0018827283	2.9661422	-2.9661422	-1.5685878	down	0.017886372	1.7689282	-1.7689282	-0.82287544
A_43_P14621	down	0.0010617247	3.2612603	-3.2612603	-1.7054296	down	0.016877268	1.768875	-1.768875	-0.8228321	Dbi	Rattus norvegicus diazepam binding inhibitor, acyl-CoA binding protein (Dbi), mRNA [NM_031853]
A_43_P19910	down	0.03790033	1.542458	-1.542458	-0.62523127	down	0.038880676	1.7596273	-1.7596273	-0.8152699	Cinp	Rattus norvegicus cyclin-dependent kinase 2-interacting protein (Cinp), mRNA [NM_001106758]
A_64_P161581	down	0.04653965	2.0464528	-2.0464528	-1.0331254	down	0.020435061	1.7449964	-1.7449964	-0.8032241	Myadm	Rattus norvegicus myeloid-associated differentiation marker (Myadm), mRNA [NM_183332]
A_44_P1043157	down	0.0010715658	2.9532232	-2.9532232	-1.5622904	down	0.02951317	1.7434318	-1.7434318	-0.80192995	Cxcl9	Rattus norvegicus C-X-C motif chemokine ligand 9 (Cxcl9), mRNA [NM_145672]
A_43_P11333	down	0.0067202114	2.2921956	-2.2921956	-1.1967301	down	0.027002998	1.7322961	-1.7322961	-0.79268557	Hyou1	Rattus norvegicus hypoxia up-regulated 1 (Hyou1), transcript variant 1, mRNA [NM_138867]
A_64_P155186	down	0.031882096	2.3025086	-2.3025086	-1.2032065	down	0.026470147	1.7232296	-1.7232296	-0.78511494	Aurka	Rattus norvegicus aurora kinase A (Aurka), mRNA [NM_153296]
A_42_P622436	down	0.014267531	2.4653804	-2.4653804	-1.3018103	down	0.018602459	1.7106779	-1.7106779	-0.7745681	Tuba1a	Rattus norvegicus tubulin, alpha 1A (Tuba1a), mRNA [NM_022298]
A_44_P184497	down	0.023626486	2.070244	-2.070244	-1.0498009	down	0.046464838	1.705664	-1.705664	-0.7703335	Cyb5b	Rattus norvegicus cytochrome b5 type B (Cyb5b), mRNA [NM_030586]
A_42_P764792	up	0.013529184	1.7979163	1.7979163	0.8463258	up	0.027135102	1.694105	1.694105	0.7605233	Larp1b	Rattus norvegicus La ribonucleoprotein domain family, member 1B (Larp1b), mRNA [NM_001014036]
A_64_P117901	up	0.0072249207	4.0639644	4.0639644	2.0228877	up	0.0286589	1.692449	1.692449	0.7591123	Trib3	Rattus norvegicus tribbles pseudokinase 3 (Trib3), mRNA [NM_144755]
A_44_P359032	up	0.003821712	2.6832247	2.6832247	1.4239678	up	0.030636428	1.69185	1.69185	0.7586016	Pink1	Rattus norvegicus PTEN induced putative kinase 1 (Pink1), mRNA [NM_001106694]
A_44_P435604	up	0.0050914963	2.9910367	2.9910367	1.5806456	up	0.041894462	1.6861587	1.6861587	0.7537403	Atp1b1	Rattus norvegicus ATPase Na+/K+ transporting subunit beta 1 (Atp1b1), mRNA [NM_013113]
A_44_P512617	up	0.027403224	2.005013	2.005013	1.0036116	up	0.027940162	1.6849314	1.6849314	0.75268984	RGD1564804	Rattus norvegicus similar to chromosome 1 open reading frame 50 (RGD1564804), mRNA [NM_001107969]
A_64_P116869	down	0.0030682774	3.2031476	-3.2031476	-1.6794903	down	0.021332074	1.6760926	-1.6760926	-0.74510187	Tmem97	Rattus norvegicus transmembrane protein 97 (Tmem97), mRNA [NM_001008334]
A_64_P018726	up	0.0018094307	2.768926	2.768926	1.4693264	up	0.031716738	1.6719723	1.6719723	0.7415509	Bnip3	Rattus norvegicus BCL2 interacting protein 3 (Bnip3), mRNA [NM_053420]
A_42_P766678	up	0.011818505	1.8594433	1.8594433	0.89487076	up	0.033878136	1.6682369	1.6682369	0.7383241	Zbtb44	Rattus norvegicus zinc finger and BTB domain containing 44 (Zbtb44), mRNA [NM_001034942]
A_44_P173156	up	0.011371663	1.9421905	1.9421905	0.9576847	up	0.032092594	1.6681699	1.6681699	0.73826617	Taf5	Rattus norvegicus TATA-box binding protein associated factor 5 (Taf5), mRNA [NM_001106365]
A_44_P242969	down	0.03485756	2.0673673	-2.0673673	-1.0477947	down	0.047918286	1.6673012	-1.6673012	-0.73751473	Gpam	Rattus norvegicus glycerol-3-phosphate acyltransferase, mitochondrial (Gpam), mRNA [NM_017274]
A_44_P625333	up	0.008298417	3.8225548	3.8225548	1.9345372	up	0.030866465	1.6659323	1.6659323	0.73632973	Ctdspl	Rattus norvegicus CTD small phosphatase like (Ctdspl), mRNA [NM_001106865]
A_64_P122671	down	0.016364912	1.8028047	-1.8028047	-0.8502431	down	0.029796045	1.6602955	-1.6602955	-0.73144	Avpi1	Rattus norvegicus arginine vasopressin-induced 1 (Avpi1), mRNA [NM_134373]
A_44_P192543	down	0.0037033015	2.6317575	-2.6317575	-1.3960265	down	0.025249546	1.648757	-1.648757	-0.72137874	Fkbp11	Rattus norvegicus FK506 binding protein 11 (Fkbp11), mRNA [NM_001013105]
A_44_P427560	up	0.0117422305	1.8328882	1.8328882	0.8741188	up	0.02928121	1.6452848	1.6452848	0.7183373	Pom121	Rattus norvegicus POM121 transmembrane nucleoporin (Pom121), mRNA [NM_053622]
A_44_P1038341	up	0.011514805	2.45921	2.45921	1.2981949	up	0.03508048	1.6229537	1.6229537	0.6986218	Hal	Rattus norvegicus histidine ammonia lyase (Hal), mRNA [NM_017159]
A_44_P229299	up	0.04460275	1.6813699	1.6813699	0.7496371	up	0.0374707	1.6165386	1.6165386	0.692908	Mepce	Rattus norvegicus methylphosphate capping enzyme (Mepce), mRNA [NM_001100678]
A_42_P701991	up	0.03253094	1.6970377	1.6970377	0.7630186	up	0.028712852	1.6141274	1.6141274	0.6907544	Atl2	Rattus norvegicus atlastin GTPase 2 (Atl2), mRNA [NM_001100671]
A_43_P14040	down	0.0068117906	4.244674	-4.244674	-2.0856538	down	0.04249217	1.6137487	-1.6137487	-0.6904159	Sgk2	Rattus norvegicus serum/glucocorticoid regulated kinase 2 (Sgk2), mRNA [NM_134463]
A_43_P13043	down	0.0030130777	2.6232686	-2.6232686	-1.3913655	down	0.046104226	1.6134377	-1.6134377	-0.6901378	Ebp	Rattus norvegicus emopamil binding protein (sterol isomerase) (Ebp), mRNA [NM_057137]
A_44_P175345	down	0.03569163	1.8136697	-1.8136697	-0.8589117	down	0.03355787	1.6101582	-1.6101582	-0.68720245	Polb	Rattus norvegicus DNA polymerase beta (Polb), mRNA [NM_017141]
A_42_P774468	down	0.025662338	1.7393327	-1.7393327	-0.7985339	down	0.030789506	1.5993495	-1.5993495	-0.6774852	Cptp	Rattus norvegicus ceramide-1-phosphate transfer protein (Cptp), mRNA [NM_001007703]
A_44_P487249	down	0.029808369	1.7044212	-1.7044212	-0.76928186	down	0.029100131	1.5935055	-1.5935055	-0.672204	Mif	Rattus norvegicus macrophage migration inhibitory factor (glycosylation-inhibiting factor) (Mif), mRNA [NM_031051]
A_42_P488904	down	0.02673783	1.6259942	-1.6259942	-0.7013221	down	0.029421331	1.5930921	-1.5930921	-0.67182964	Slc25a44	Rattus norvegicus solute carrier family 25, member 44 (Slc25a44), mRNA [NM_001108947]
A_44_P183488	down	0.014600528	1.7909818	-1.7909818	-0.84075063	down	0.031602215	1.5922167	-1.5922167	-0.6710367	Casp7	Rattus norvegicus caspase 7 (Casp7), mRNA [NM_022260]
A_64_P088126	down	0.007597056	3.2942603	-3.2942603	-1.7199545	down	0.0496141	1.5912148	-1.5912148	-0.6701286	Mrps27	Rattus norvegicus mitochondrial ribosomal protein S27 (Mrps27), transcript variant 2, mRNA [NM_001108543]
A_44_P214811	down	0.007559617	1.9881202	-1.9881202	-0.99140495	down	0.043326724	1.5905777	-1.5905777	-0.66955084	Tfrc	Rattus norvegicus transferrin receptor (Tfrc), mRNA [NM_022712]
A_42_P766909	down	0.03511234	1.600993	-1.600993	-0.678967	down	0.039943717	1.5878233	-1.5878233	-0.66705036	Ppp1r14a	Rattus norvegicus protein phosphatase 1, regulatory (inhibitor) subunit 14A (Ppp1r14a), mRNA [NM_130403]
A_43_P21118	up	0.031831518	1.875221	1.875221	0.9070606	up	0.029512163	1.5853862	1.5853862	0.66483426	Klhl24	Rattus norvegicus kelch-like family member 24 (Klhl24), mRNA [NM_181473]
A_64_P074332	down	0.0061180913	2.2009661	-2.2009661	-1.1381369	down	0.03388171	1.5838393	-1.5838393	-0.663426	Manf	Rattus norvegicus mesencephalic astrocyte-derived neurotrophic factor (Manf), mRNA [NM_001108183]
A_43_P14221	down	0.0011285696	3.9060223	-3.9060223	-1.9657001	down	0.032955296	1.5836535	-1.5836535	-0.66325665	Tkt	Rattus norvegicus transketolase (Tkt), mRNA [NM_022592]
A_64_P025507	down	0.023018869	1.6805543	-1.6805543	-0.74893713	down	0.03366715	1.5836121	-1.5836121	-0.663219		transmembrane protein 258 [Source:MGI Symbol;Acc:MGI:1916288] [ENSRNOT00000082858]
A_44_P1054213	down	0.020911071	1.8735527	-1.8735527	-0.90577656	down	0.031100491	1.5834221	-1.5834221	-0.6630458	Hspa5	Rattus norvegicus heat shock protein family A member 5 (Hspa5), mRNA [NM_013083]
A_64_P013486	up	0.023192491	2.0165658	2.0165658	1.0119004	up	0.049658954	1.5721593	1.5721593	0.6527474	Fdxacb1	Rattus norvegicus ferredoxin-fold anticodon binding domain containing 1 (Fdxacb1), mRNA [NM_001108145]
A_64_P111786	up	0.024157643	2.137575	2.137575	1.0959749	up	0.04191668	1.5637139	1.5637139	0.64497656	Sqor	Rattus norvegicus sulfide quinone reductase-like (yeast) (Sqrdl), mRNA [NM_001047913]
A_43_P11268	up	0.014171497	1.7929227	1.7929227	0.8423133	up	0.046538245	1.5585713	1.5585713	0.64022416	Cdkn1b	Rattus norvegicus cyclin-dependent kinase inhibitor 1B (Cdkn1b), mRNA [NM_031762]
A_44_P495611	up	0.0101458635	1.9399022	1.9399022	0.9559839	up	0.04208647	1.5418484	1.5418484	0.6246609	Wdfy3	Rattus norvegicus WD repeat and FYVE domain containing 3 (Wdfy3), mRNA [NM_001170551]
A_44_P1045354	down	0.034158587	1.761625	-1.761625	-0.81690687	down	0.038150463	1.541637	-1.541637	-0.624463	Slc35b1	Rattus norvegicus solute carrier family 35, member B1 (Slc35b1), mRNA [NM_199081]
A_64_P126493	up	0.006780063	3.1422827	3.1422827	1.6518129	up	0.043470524	1.5411102	1.5411102	0.62397	Crem	Rattus norvegicus cAMP responsive element modulator (Crem), transcript variant 3, mRNA [NM_001110860]
A_42_P539095	down	0.007579345	1.9475307	-1.9475307	-0.9616461	down	0.042363707	1.5384836	-1.5384836	-0.6215091	Arl16	PREDICTED: Rattus norvegicus ADP-ribosylation factor like GTPase 16 (Arl16), mRNA [XM_002724584]
A_42_P477311	down	0.016697794	1.8073866	-1.8073866	-0.85390514	down	0.039441045	1.5351317	-1.5351317	-0.6183624	Wars1	Rattus norvegicus tryptophanyl-tRNA synthetase (Wars1), mRNA [NM_001013170]
A_44_P485640	down	0.030763283	1.6850033	-1.6850033	-0.7527514	down	0.043937318	1.5344986	-1.5344986	-0.6177673		similar to ribosomal protein L10a [Source:RGD Symbol;Acc:1565459] [ENSRNOT00000042056]
A_44_P281193	up	0.021950882	1.6360894	1.6360894	0.7102516	up	0.04765023	1.5342747	1.5342747	0.6175568	Spns1	Rattus norvegicus SPNS sphingolipid transporter 1 (Spns1), mRNA [NM_001039208]
A_42_P700817	up	0.014480731	1.9073424	1.9073424	0.93156385	up	0.040606152	1.5318286	1.5318286	0.61525494	Apoa5	Rattus norvegicus apolipoprotein A5 (Apoa5), transcript variant 1, mRNA [NM_080576]
A_43_P20587	down	0.012601819	1.9503515	-1.9503515	-0.96373415	down	0.04265034	1.5270268	-1.5270268	-0.61072534	Gypc	Rattus norvegicus glycophorin C (Gerbich blood group) (Gypc), mRNA [NM_001013233]
A_44_P991616	down	0.0138131995	1.8343433	-1.8343433	-0.8752637	down	0.045181267	1.519727	-1.519727	-0.60381216	Uba5	Rattus norvegicus ubiquitin-like modifier activating enzyme 5 (Uba5), mRNA [NM_001009669]
A_64_P095948	down	0.03878803	1.6103743	-1.6103743	-0.68739605	down	0.043123174	1.5136534	-1.5136534	-0.59803486
A_64_P163919						down	0.0022191994	5.170231	-5.170231	-2.3702288	Mki67	Rattus norvegicus marker of proliferation Ki-67 (Mki67), mRNA [NM_001271366]
A_44_P1162955	down	0.008853584	5.5247283	-5.5247283	-2.4659035						Mki67	Rattus norvegicus marker of proliferation Ki-67 (Mki67), mRNA [NM_001271366]
A_44_P529299						down	0.0019117958	4.202322	-4.202322	-2.0711868	Rtkn	Rattus norvegicus rhotekin (Rtkn), mRNA [NM_184046]
A_64_P128313	down	0.044233713	1.7815468	-1.7815468	-0.8331304						Rtkn	Rattus norvegicus rhotekin (Rtkn), mRNA [NM_184046]
A_64_P024620						down	0.0032720896	3.840405	-3.840405	-1.9412584	Acat2	Rattus norvegicus acetyl-CoA acetyltransferase 2 (Acat2), mRNA [NM_001006995]
A_43_P16774	down	2.661642E-4	14.216999	-14.216999	-3.829545						Acat2	Rattus norvegicus acetyl-CoA acetyltransferase 2 (Acat2), mRNA [NM_001006995]
A_64_P136153						down	0.029513903	3.5614898	-3.5614898	-1.8324808	Me1	Rattus norvegicus malic enzyme 1, NADP(+)-dependent, cytosolic (Me1), mRNA [NM_012600]
A_42_P792817	down	0.04468154	4.1613913	-4.1613913	-2.057066						Me1	Rattus norvegicus malic enzyme 1, NADP(+)-dependent, cytosolic (Me1), mRNA [NM_012600]
A_44_P138790						up	0.0014258819	3.0344543	3.0344543	1.6014371	Cirbp	Rattus norvegicus cold inducible RNA binding protein (Cirbp), mRNA [NM_031147]
A_44_P1087028	up	0.044386256	1.6119004	1.6119004	0.68876266						Cirbp	Rattus norvegicus cold inducible RNA binding protein (Cirbp), mRNA [NM_031147]
A_64_P013942						down	0.0060389615	2.6936896	-2.6936896	-1.4295835	Ifi27l2b	Rattus norvegicus interferon, alpha-inducible protein 27 like 2B (Ifi27l2b), mRNA [NM_206846]
A_43_P14036	down	0.006824385	2.8385584	-2.8385584	-1.5051584						Ifi27l2b	Rattus norvegicus interferon, alpha-inducible protein 27 like 2B (Ifi27l2b), mRNA [NM_206846]
A_42_P481087						up	0.00625171	2.63677	2.63677	1.3987718	Pdzrn3	Rattus norvegicus PDZ domain containing RING finger 3 (Pdzrn3), mRNA [NM_001271251]
A_64_P005997	up	0.013388507	2.7883449	2.7883449	1.479409						Pdzrn3	Rattus norvegicus PDZ domain containing RING finger 3 (Pdzrn3), mRNA [NM_001271251]
A_64_P154952						up	0.0010053993	2.6344898	2.6344898	1.3975235	Nr4a2	Rattus norvegicus nuclear receptor subfamily 4, group A, member 2 (Nr4a2), mRNA [NM_019328]
A_44_P1086200	up	0.0056862896	8.6171465	8.6171465	3.1072102						Nr4a2	Rattus norvegicus nuclear receptor subfamily 4, group A, member 2 (Nr4a2), mRNA [NM_019328]
A_44_P988767						up	0.004680594	2.5699747	2.5699747	1.3617541	Crem	Rattus norvegicus cAMP responsive element modulator (Crem), transcript variant 9, mRNA [NM_001271248]
A_44_P1159378	up	0.006829736	3.747145	3.747145	1.9057918						Crem	Rattus norvegicus cAMP responsive element modulator (Crem), transcript variant 9, mRNA [NM_001271248]
A_43_P12729						up	0.018473338	2.5437195	2.5437195	1.3469396	Gde1	Rattus norvegicus glycerophosphodiester phosphodiesterase 1 (Gde1), mRNA [NM_032615]
A_44_P1087048	up	0.022883762	2.7542753	2.7542753	1.4616728						Gde1	Rattus norvegicus glycerophosphodiester phosphodiesterase 1 (Gde1), mRNA [NM_032615]
A_64_P035817						up	0.034739695	2.50943	2.50943	1.3273597	Nsd3	PREDICTED: Rattus norvegicus Wolf-Hirschhorn syndrome candidate 1-like 1 (Whsc1l1), transcript variant X2, mRNA [XM_008771349]
A_44_P1113954	up	0.04782031	1.558649	1.558649	0.64029604						Nsd3	PREDICTED: Rattus norvegicus Wolf-Hirschhorn syndrome candidate 1-like 1 (Whsc1l1), transcript variant X2, mRNA [XM_008771349]
A_64_P085072						up	0.0053965496	2.5091188	2.5091188	1.3271807	Foxo3	HUMFESCD transmembrane protein {Homo sapiens} (exp=-1; wgp=0; cg=0), partial (15%) [TC596921]
A_42_P476785	up	0.018179907	2.0400534	2.0400534	1.0286069						Foxo3	HUMFESCD transmembrane protein {Homo sapiens} (exp=-1; wgp=0; cg=0), partial (15%) [TC596921]
A_64_P090400						down	0.005149843	2.5073154	-2.5073154	-1.3261435	Ska2	Rattus norvegicus spindle and kinetochore associated complex subunit 2 (Ska2), mRNA [NM_001009624]
A_44_P1370935	down	0.006892105	2.2408388	-2.2408388	-1.1640388						Ska2	Rattus norvegicus spindle and kinetochore associated complex subunit 2 (Ska2), mRNA [NM_001009624]
A_44_P191309						up	0.00203714	2.47728	2.47728	1.3087568	Lpin1	PREDICTED: Rattus norvegicus lipin 1 (Lpin1), transcript variant X1, mRNA [XM_008764593]
A_44_P1106607	up	0.016515406	2.6832902	2.6832902	1.4240031						Lpin1	PREDICTED: Rattus norvegicus lipin 1 (Lpin1), transcript variant X1, mRNA [XM_008764593]
A_64_P076352						up	0.0068549816	2.4532194	2.4532194	1.2946763	Hacl1	2-hydroxyacyl-CoA lyase 1 [Source:RGD Symbol;Acc:619849] [ENSRNOT00000026588]
A_44_P1149576	up	6.949807E-5	9.2741165	9.2741165	3.2132099						Hacl1	2-hydroxyacyl-CoA lyase 1 [Source:RGD Symbol;Acc:619849] [ENSRNOT00000026588]
A_64_P268234						down	0.002927383	2.4025953	-2.4025953	-1.2645936	Spc24	SPC24, NDC80 kinetochore complex component [Source:RGD Symbol;Acc:1307631] [ENSRNOT00000045384]
A_44_P1153499	down	0.0066459486	4.3458652	-4.3458652	-2.1196434						Spc24	SPC24, NDC80 kinetochore complex component [Source:RGD Symbol;Acc:1307631] [ENSRNOT00000045384]
A_64_P121881						up	0.0027096441	2.291513	2.291513	1.1963004	Pptc7	Rattus norvegicus PTC7 protein phosphatase homolog (Pptc7), mRNA [NM_001107141]
A_44_P1083572	up	0.0091967145	3.278066	3.278066	1.7128448						Pptc7	Rattus norvegicus PTC7 protein phosphatase homolog (Pptc7), mRNA [NM_001107141]
A_44_P995373						down	0.03520271	2.2051802	-2.2051802	-1.1408966	Cystm1	PREDICTED: Rattus norvegicus cysteine-rich transmembrane module containing 1 (Cystm1), transcript variant X2, mRNA [XM_006222544]
A_44_P1151884	down	0.011344918	2.1661158	-2.1661158	-1.1151103						Cystm1	PREDICTED: Rattus norvegicus cysteine-rich transmembrane module containing 1 (Cystm1), transcript variant X2, mRNA [XM_006222544]
A_44_P435422						up	0.008031931	2.1884387	2.1884387	1.1299019	Mef2a	PREDICTED: Rattus norvegicus myocyte enhancer factor 2a (Mef2a), transcript variant X3, mRNA [XM_008759542]
A_44_P1101161	up	0.04170747	1.5871769	1.5871769	0.66646296						Mef2a	PREDICTED: Rattus norvegicus myocyte enhancer factor 2a (Mef2a), transcript variant X3, mRNA [XM_008759542]
A_44_P1029435						up	0.014145002	2.1873384	2.1873384	1.1291764	Ppm1k	Rattus norvegicus protein phosphatase, Mg2+/Mn2+ dependent, 1K (Ppm1k), mRNA [NM_001107863]
A_44_P1084685	up	0.010915175	5.6479635	5.6479635	2.4977307						Ppm1k	Rattus norvegicus protein phosphatase, Mg2+/Mn2+ dependent, 1K (Ppm1k), mRNA [NM_001107863]
A_64_P142111						up	0.0046149837	2.1394343	2.1394343	1.0972294	Gxylt1	Rattus norvegicus glucoside xylosyltransferase 1 (Gxylt1), mRNA [NM_001100887]
A_44_P637763	up	0.0085755605	1.9186355	1.9186355	0.94008064						Gxylt1	Rattus norvegicus glucoside xylosyltransferase 1 (Gxylt1), mRNA [NM_001100887]
A_64_P104009						down	0.021118365	2.1345136	-2.1345136	-1.0939074	Rrm2	Rattus norvegicus ribonucleotide reductase regulatory subunit M2 (Rrm2), mRNA [NM_001025740]
A_44_P1085313	down	7.2311924E-4	22.689531	-22.689531	-4.503955						Rrm2	Rattus norvegicus ribonucleotide reductase regulatory subunit M2 (Rrm2), mRNA [NM_001025740]
A_64_P118767						up	0.003696416	2.1305478	2.1305478	1.0912244	Peg12	Rattus norvegicus paternally expressed 12 (Peg12), mRNA [NM_001170562]
A_44_P1089367	up	0.047641087	1.6477723	1.6477723	0.7205169						Peg12	Rattus norvegicus paternally expressed 12 (Peg12), mRNA [NM_001170562]
A_44_P1025349						down	0.012524349	2.0531628	-2.0531628	-1.037848	Uba7	Rattus norvegicus ubiquitin-like modifier activating enzyme 7 (Uba7), mRNA [NM_001106856]
A_42_P681123	down	8.5085654E-4	3.1512756	-3.1512756	-1.6559359						Uba7	Rattus norvegicus ubiquitin-like modifier activating enzyme 7 (Uba7), mRNA [NM_001106856]
A_44_P415199						up	0.016749648	2.0411456	2.0411456	1.029379	Tubgcp6	Rattus norvegicus tubulin, gamma complex associated protein 6 (Tubgcp6), mRNA [NM_001108748]
A_44_P1107838	up	0.0076168953	2.1611886	2.1611886	1.111825						Tubgcp6	Rattus norvegicus tubulin, gamma complex associated protein 6 (Tubgcp6), mRNA [NM_001108748]
A_42_P467928						up	0.0355906	2.0392747	2.0392747	1.0280561	Rnf138	Rattus norvegicus ring finger protein 138 (Rnf138), mRNA [NM_053588]
A_44_P312217	up	0.010095001	1.9571613	1.9571613	0.96876264						Rnf138	Rattus norvegicus ring finger protein 138 (Rnf138), mRNA [NM_053588]
A_43_P12151						up	0.006291738	2.0323281	2.0323281	1.0231333	Nrbf2	Rattus norvegicus nuclear receptor binding factor 2 (Nrbf2), mRNA [NM_022186]
A_44_P1083128	up	0.013292044	1.8273202	1.8273202	0.86972946						Nrbf2	Rattus norvegicus nuclear receptor binding factor 2 (Nrbf2), mRNA [NM_022186]
A_64_P090792						up	0.024531925	2.023461	2.023461	1.0168251	Amdhd1	Rattus norvegicus amidohydrolase domain containing 1 (Amdhd1), mRNA [NM_001191781]
A_44_P274716	up	7.496388E-4	3.8310246	3.8310246	1.9377303						Amdhd1	Rattus norvegicus amidohydrolase domain containing 1 (Amdhd1), mRNA [NM_001191781]
A_64_P081447						up	0.007190889	2.0169036	2.0169036	1.0121422	Cirbp	Rattus norvegicus cold inducible RNA binding protein (Cirbp), mRNA [NM_031147]
A_44_P1087028	up	0.044386256	1.6119004	1.6119004	0.68876266						Cirbp	Rattus norvegicus cold inducible RNA binding protein (Cirbp), mRNA [NM_031147]
A_64_P147190						down	0.015778065	2.0154064	-2.0154064	-1.0110707	Fdps	Rattus norvegicus farnesyl diphosphate synthase (Fdps), mRNA [NM_031840]
A_44_P432965	down	0.002201583	7.1949344	-7.1949344	-2.8469815						Fdps	Rattus norvegicus farnesyl diphosphate synthase (Fdps), mRNA [NM_031840]
A_43_P21196						up	0.048225243	1.9957166	1.9957166	0.9969068	Dbr1	Rattus norvegicus debranching RNA lariats 1 (Dbr1), mRNA [NM_001109437]
A_64_P047349	up	0.028443463	1.8276824	1.8276824	0.8700154						Dbr1	Rattus norvegicus debranching RNA lariats 1 (Dbr1), mRNA [NM_001109437]
A_44_P426550						down	0.031889766	1.9298044	-1.9298044	-0.9484546	Prss53	Rattus norvegicus protease, serine, 53 (Prss53), mRNA [NM_001109156]
A_44_P1090325	down	0.044146948	2.4949427	-2.4949427	-1.3190067						Prss53	Rattus norvegicus protease, serine, 53 (Prss53), mRNA [NM_001109156]
A_42_P705481						up	0.036893412	1.9130005	1.9130005	0.9358372	Il6st	Rattus norvegicus interleukin 6 signal transducer (Il6st), mRNA [NM_001008725]
A_42_P697450	up	0.013153605	1.9603397	1.9603397	0.9711036						Il6st	Rattus norvegicus interleukin 6 signal transducer (Il6st), mRNA [NM_001008725]
A_64_P002167						up	0.03096581	1.8361039	1.8361039	0.8766477	Wdfy3	Rattus norvegicus WD repeat and FYVE domain containing 3 (Wdfy3), mRNA [NM_001170551]
A_44_P495611	up	0.0101458635	1.9399022	1.9399022	0.9559839						Wdfy3	Rattus norvegicus WD repeat and FYVE domain containing 3 (Wdfy3), mRNA [NM_001170551]
A_64_P144514						down	0.043521076	1.8100415	-1.8100415	-0.8560228	Tuba1b	Rattus norvegicus tubulin, alpha 1B (Tuba1b), mRNA [NM_001044270]
A_44_P1364618	down	0.04377192	1.9725704	-1.9725704	-0.9800768						Tuba1b	Rattus norvegicus tubulin, alpha 1B (Tuba1b), mRNA [NM_001044270]
A_64_P020697						up	0.016071627	1.8084999	1.8084999	0.85479355	Micall1	MICAL-like 1 [Source:RGD Symbol;Acc:1305415] [ENSRNOT00000036357]
A_43_P18699	up	0.019944428	2.5294542	2.5294542	1.3388261						Micall1	MICAL-like 1 [Source:RGD Symbol;Acc:1305415] [ENSRNOT00000036357]
A_64_P050545						down	0.029120099	1.8082734	-1.8082734	-0.8546128	Rdh11	Rattus norvegicus retinol dehydrogenase 11 (all-trans/9-cis/11-cis) (Rdh11), mRNA [NM_001012193]
A_44_P1083023	down	0.01194008	2.857887	-2.857887	-1.5149488						Rdh11	Rattus norvegicus retinol dehydrogenase 11 (all-trans/9-cis/11-cis) (Rdh11), mRNA [NM_001012193]
A_64_P117856						up	0.018242175	1.7623353	1.7623353	0.81748843	B3gnt2	Rattus norvegicus UDP-GlcNAc:betaGal beta-1,3-N-acetylglucosaminyltransferase 2 (B3gnt2), mRNA [NM_001107240]
A_44_P975327	up	0.036467575	2.2797651	2.2797651	1.1888852						B3gnt2	Rattus norvegicus UDP-GlcNAc:betaGal beta-1,3-N-acetylglucosaminyltransferase 2 (B3gnt2), mRNA [NM_001107240]
A_44_P360496						down	0.01832673	1.7581367	-1.7581367	-0.8140473	Sec61a1	Rattus norvegicus Sec61 translocon alpha 1 subunit (Sec61a1), mRNA [NM_199256]
A_44_P1084610	down	0.012353264	1.810059	-1.810059	-0.85603666						Sec61a1	Rattus norvegicus Sec61 translocon alpha 1 subunit (Sec61a1), mRNA [NM_199256]
A_64_P048183						down	0.0189646	1.7520207	-1.7520207	-0.8090198	Ckap2	Rattus norvegicus cytoskeleton associated protein 2 (Ckap2), mRNA [NM_001169139]
A_64_P002854	down	0.001022413	16.349468	-16.349468	-4.031172						Ckap2	Rattus norvegicus cytoskeleton associated protein 2 (Ckap2), mRNA [NM_001169139]
A_44_P520521						up	0.04850584	1.7414409	1.7414409	0.8002815	Slc17a2	Rattus norvegicus solute carrier family 17, member 2 (Slc17a2), mRNA [NM_001107353]
A_44_P1083757	up	0.04142968	1.8161054	1.8161054	0.8608479						Slc17a2	Rattus norvegicus solute carrier family 17, member 2 (Slc17a2), mRNA [NM_001107353]
A_64_P030362						up	0.04076106	1.7407831	1.7407831	0.79973644	Ephb3	Rattus norvegicus Eph receptor B3 (Ephb3), mRNA [NM_001105868]
A_43_P20544	up	0.016917009	2.1526594	2.1526594	1.1061201						Ephb3	Rattus norvegicus Eph receptor B3 (Ephb3), mRNA [NM_001105868]
A_64_P135474						up	0.045926128	1.7324587	1.7324587	0.79282093	Cxcl12	Rattus norvegicus C-X-C motif chemokine ligand 12 (Cxcl12), transcript variant 3, mRNA [NM_001033883]
A_44_P337351	up	0.03637727	1.6815727	1.6815727	0.7498111						Cxcl12	Rattus norvegicus C-X-C motif chemokine ligand 12 (Cxcl12), transcript variant 3, mRNA [NM_001033883]
A_44_P545935						down	0.020769062	1.7311891	-1.7311891	-0.79176337	Klb	PREDICTED: Rattus norvegicus klotho beta (Klb), transcript variant X2, mRNA [XM_008765414]
A_44_P1365499	down	0.007711315	2.1236773	-2.1236773	-1.0865645						Klb	PREDICTED: Rattus norvegicus klotho beta (Klb), transcript variant X2, mRNA [XM_008765414]
A_64_P020163						down	0.028418621	1.674596	-1.674596	-0.74381304	Plxna2	plexin A2 [Source:RGD Symbol;Acc:1305325] [ENSRNOT00000009900]
A_44_P945950	down	0.032160535	2.1714246	-2.1714246	-1.1186419						Plxna2	plexin A2 [Source:RGD Symbol;Acc:1305325] [ENSRNOT00000009900]
A_64_P114898						up	0.020079168	1.6692355	1.6692355	0.7391875	Prelid2	Rattus norvegicus PRELI domain containing 2 (Prelid2), mRNA [NM_001271333]
A_44_P1080854	up	0.022992212	1.6859903	1.6859903	0.75359625						Prelid2	Rattus norvegicus PRELI domain containing 2 (Prelid2), mRNA [NM_001271333]
A_42_P604399						down	0.034696616	1.6491352	-1.6491352	-0.72170967	Cyp51	Rattus norvegicus cytochrome P450, family 51 (Cyp51), mRNA [NM_012941]
A_42_P635007	down	7.14895E-4	9.974866	-9.974866	-3.3182974						Cyp51	Rattus norvegicus cytochrome P450, family 51 (Cyp51), mRNA [NM_012941]
A_64_P080169						up	0.034983654	1.648141	1.648141	0.7208397	Klf12	Rattus norvegicus Kruppel-like factor 12 (Klf12), mRNA [NM_001107281]
A_64_P080174	up	0.019114079	1.8095777	1.8095777	0.85565305						Klf12	Rattus norvegicus Kruppel-like factor 12 (Klf12), mRNA [NM_001107281]
A_64_P058162						down	0.02743499	1.6091415	-1.6091415	-0.68629116	Mif	Rattus norvegicus macrophage migration inhibitory factor (glycosylation-inhibiting factor) (Mif), mRNA [NM_031051]
A_44_P487249	down	0.029808369	1.7044212	-1.7044212	-0.76928186						Mif	Rattus norvegicus macrophage migration inhibitory factor (glycosylation-inhibiting factor) (Mif), mRNA [NM_031051]
A_43_P15508						up	0.038283285	1.5901625	1.5901625	0.6691742	Rbl2	Rattus norvegicus RB transcriptional corepressor like 2 (Rbl2), mRNA [NM_031094]
A_44_P264749	up	0.0478033	1.6543989	1.6543989	0.72630715						Rbl2	Rattus norvegicus RB transcriptional corepressor like 2 (Rbl2), mRNA [NM_031094]
A_44_P466700						up	0.039518967	1.5764724	1.5764724	0.6566999	Lpin1	PREDICTED: Rattus norvegicus lipin 1 (Lpin1), transcript variant X1, mRNA [XM_008764593]
A_44_P1106607	up	0.016515406	2.6832902	2.6832902	1.4240031						Lpin1	PREDICTED: Rattus norvegicus lipin 1 (Lpin1), transcript variant X1, mRNA [XM_008764593]
A_44_P458878						down	0.036531236	1.5645033	-1.5645033	-0.6457047	Tcf19	Rattus norvegicus transcription factor 19 (Tcf19), mRNA [NM_213561]
A_44_P1084969	down	0.012996441	2.5720515	-2.5720515	-1.3629196						Tcf19	Rattus norvegicus transcription factor 19 (Tcf19), mRNA [NM_213561]
A_64_P088122						down	0.035933636	1.5610824	-1.5610824	-0.64254665	Mrps27	Rattus norvegicus mitochondrial ribosomal protein S27 (Mrps27), transcript variant 2, mRNA [NM_001108543]
A_64_P088126	down	0.007597056	3.2942603	-3.2942603	-1.7199545						Mrps27	Rattus norvegicus mitochondrial ribosomal protein S27 (Mrps27), transcript variant 2, mRNA [NM_001108543]
A_42_P558503						up	0.04327011	1.5532126	1.5532126	0.63525534	Brd2	Rattus norvegicus bromodomain containing 2 (Brd2), mRNA [NM_212495]
A_44_P1086968	up	0.0034529022	2.4036918	2.4036918	1.2652519						Brd2	Rattus norvegicus bromodomain containing 2 (Brd2), mRNA [NM_212495]
A_44_P274526						down	0.038543995	1.5485948	-1.5485948	-0.63095975	Fam210b	Rattus norvegicus family with sequence similarity 210, member B (Fam210b), mRNA [NM_001106547]
A_44_P1087971	down	0.010360872	2.0238645	-2.0238645	-1.0171127						Fam210b	Rattus norvegicus family with sequence similarity 210, member B (Fam210b), mRNA [NM_001106547]
A_64_P091608						down	0.04513365	1.5391124	-1.5391124	-0.6220986	Afmid	Rattus norvegicus arylformamidase (Afmid), mRNA [NM_001111366]
A_44_P1082344	down	0.006812528	2.4988036	-2.4988036	-1.3212376						Afmid	Rattus norvegicus arylformamidase (Afmid), mRNA [NM_001111366]
A_64_P105278						up	0.040990446	1.525817	1.525817	0.60958195	Adgrl2	Rattus norvegicus adhesion G protein-coupled receptor L2 (Adgrl2), transcript variant 1, mRNA [NM_134408]
A_44_P365443	up	0.048345774	1.5281947	1.5281947	0.6118283						Adgrl2	Rattus norvegicus adhesion G protein-coupled receptor L2 (Adgrl2), transcript variant 1, mRNA [NM_134408]
A_42_P797303						up	0.046486072	1.519047	1.519047	0.6031665	Mia3	MIA family member 3, ER export factor [Source:RGD Symbol;Acc:1591600] [ENSRNOT00000085600]
A_44_P1154616	up	0.028069802	1.6817751	1.6817751	0.7499848						Mia3	MIA family member 3, ER export factor [Source:RGD Symbol;Acc:1591600] [ENSRNOT00000085600]

## Sheet: Kidney
KIDNEY		AuNPs				TiO2NPs
ProbeName	Regulation	p value	FC (abs)	FC	Log FC	p value	FC (abs)	FC	Log FC	GeneSymbol	Description
A_44_P318323	down	0.024389623	5.1228275	-5.1228275	-2.3569403	0.024389623	5.1228275	-5.1228275	-2.3569403	Ugt2b7	Rattus norvegicus UDP glucuronosyltransferase family 2 member B7 (Ugt2b7), mRNA [NM_173323]
A_44_P178252	down	0.034553487	3.5729146	-3.5729146	-1.8371015	0.034553487	3.5729146	-3.5729146	-1.8371015	Ccl21	Rattus norvegicus C-C motif chemokine ligand 21 (Ccl21), mRNA [NM_001008513]
A_42_P813567	down	0.0066323667	6.9093747	-6.9093747	-2.7885551	0.0066323667	6.9093747	-6.9093747	-2.7885551	Scd2	Rattus norvegicus stearoyl-Coenzyme A desaturase 2 (Scd2), mRNA [NM_031841]
A_44_P480424	down	0.04784348	4.1178093	-4.1178093	-2.041877	0.04784348	4.1178093	-4.1178093	-2.041877	Tigd3	Rattus norvegicus tigger transposable element derived 3 (Tigd3), mRNA [NM_001107573]
A_43_P10931	up	0.03760648	2.7137237	2.7137237	1.4402738	0.03760648	2.7137237	2.7137237	1.4402738	Gpr68	Rattus norvegicus G protein-coupled receptor 68 (Gpr68), mRNA [NM_001108049]
A_43_P14648	up	0.004343536	5.5523243	5.5523243	2.4730918	0.004343536	5.5523243	5.5523243	2.4730918	Art3	Rattus norvegicus ADP-ribosyltransferase 3 (Art3), mRNA [NM_001012034]
A_44_P313971	down									Slc25a45	Rattus norvegicus solute carrier family 25, member 45 (Slc25a45), mRNA [NM_001271179]
A_44_P1089231	down	0.04973039	3.4959917	-3.4959917	-1.8057017	0.04973039	3.4959917	-3.4959917	-1.8057017	Slc25a45	Rattus norvegicus solute carrier family 25, member 45 (Slc25a45), mRNA [NM_001271179]
