# Supplementary material for: Gold and titania nanoparticles accumulated in the body induce late toxic effects and alterations in transcriptional and miRNA landscape
Source: Royal Society of Chemistry journal article supplement (doi:10.1039/d3en00954h), 2024-01-01
Supplement: d3en00954h12.xlsx [file d3en00954h12.xlsx]

## Sheet: Liver  AuNPs
ID	Description	GeneRatio	BgRatio	pvalue	p.adjust	qvalue	geneID	Count
rno00071	Fatty acid degradation	22/923	49/8909	5.52068e-10	1.79974e-07	1.44119e-07	Acaa2/Acads/Acadsb/Acadvl/Acat2/Acat2l1/Acox1/Acsl3/Acsl4/Acsl5/Adh1/Adh7/Aldh1b1/Cpt1a/Cyp4a1/Cyp4a2/Cyp4a3/Cyp4a8/Eci1/Gcdh/Hadha/Hadhb	22
rno00100	Steroid biosynthesis	13/923	20/8909	5.6651e-09	9.23411e-07	7.39445e-07	Cyp51/Dhcr24/Dhcr7/Ebp/Fdft1/Hsd17b7/Lbr/Lss/Msmo1/Nsdhl/Sc5d/Sqle/Tm7sf2	13
rno01212	Fatty acid metabolism	23/923	61/8909	1.37614e-08	1.49541e-06	1.19749e-06	Acaa2/Acaca/Acads/Acadsb/Acadvl/Acat2/Acat2l1/Acox1/Acsl3/Acsl4/Acsl5/Cpt1a/Elovl5/Elovl6/Fads1/Fads2/Fasn/Hadha/Hadhb/LOC681458/Scd/Scd4/Tecr	23
rno03320	PPAR signaling pathway	27/923	86/8909	7.12263e-08	5.80494e-06	4.64845e-06	Acox1/Acsl3/Acsl4/Acsl5/Apoa5/Cpt1a/Cyp4a1/Cyp4a2/Cyp4a3/Cyp4a8/Cyp7a1/Cyp8b1/Dbi/Fabp1/Fabp5/Fabp6/Fads2/Gk/Hmgcs1/Hmgcs2/LOC681458/Me1/Pck1/Pck2/Scd/Scd4/Slc27a2	27
rno01200	Carbon metabolism	30/923	119/8909	2.6802e-06	0.000174749	0.000139934	Acads/Acat2/Acat2l1/Acox1/Acss2/Agxt/Aldoc/Cs/Fbp1/Fbp2/Fh/Gck/Gldc/Glyctk/Got1/Gpt/Hao1/Idnk/Me1/Pgd/Pgp/Phgdh/Pklr/Psat1/Rgn/Sds/Sucla2/Suclg2/Tkfc/Tkt	30
rno00650	Butanoate metabolism	12/923	28/8909	8.97031e-06	0.000487387	0.000390287	Aacs/Acads/Acat2/Acat2l1/Acsm3/Aldh5a1/Bdh2/Hadha/Hmgcs1/Hmgcs2/Oxct1/Oxct2a	12
rno00900	Terpenoid backbone biosynthesis	11/923	25/8909	1.57658e-05	0.000645272	0.000516718	Acat2/Acat2l1/Fdps/Ggps1/Hmgcr/Hmgcs1/Hmgcs2/Idi1/Mvd/Mvk/Pmvk	11
rno04141	Protein processing in endoplasmic reticulum	36/923	168/8909	1.58349e-05	0.000645272	0.000516718	Calr/Canx/Ckap4/Cryab/Derl2/Derl3/Dnajb11/Edem1/Edem2/Eif2ak4/Erp29/Herpud1/Hsp90b1/Hspa4l/Hspa5/Hyou1/Man1a1/Mapk8/Pdia3/Prkn/Rad23a/Rnf185/Rpn1/Rrbp1/Sec23b/Sec61a1/Sec61b/Sec61g/Ssr1/Ssr2/Ssr3/Ssr4/Stt3a/Svip/Uggt1/Xbp1	36
rno04540	Gap junction	22/923	87/8909	5.38023e-05	0.00194884	0.00156058	Adcy4/Adcy9/Cdk1/Egf/Egfr/Htr2b/Itpr2/Map3k2/Mapk1/Pdgfa/Pdgfc/Prkacb/Prkcg/Sos1/Tuba1a/Tuba1b/Tuba3a/Tuba4a/Tubb2a/Tubb4b/Tubb5/Tubb6	22
rno04910	Insulin signaling pathway	30/923	139/8909	6.90033e-05	0.00208958	0.00167328	Acaca/Acacb/Calm1/Calml3/Cblb/Crkl/Fasn/Fbp1/Fbp2/Flot2/Gck/Inppl1/Irs2/Irs3/Lipe/Mapk1/Mapk8/Mknk2/Pck1/Pck2/Pklr/Ppargc1a/Ppp1r3b/Prkaa2/Prkacb/Pygb/Socs2/Socs3/Sos1/Srebf1	30
rno00140	Steroid hormone biosynthesis	21/923	83/8909	7.83851e-05	0.00208958	0.00167328	Akr1c3/Comt/Cyp11a1/Cyp17a1/Cyp21a1/Cyp2b2/Cyp2c11/Cyp2c22/Cyp2c6v1/Cyp2c7/Cyp2e1/Cyp3a2/Cyp7a1/Hsd11b2/Hsd17b2/Hsd17b7/Lrtomt/Srd5a2/Sts/Ugt1a6/Ugt2a3	21
rno04110	Cell cycle	28/923	127/8909	8.05526e-05	0.00208958	0.00167328	Bub1/Ccna2/Ccnb2/Ccnd2/Ccne1/Ccne2/Cdc7/Cdk1/Cdkn1b/Crebbp/Dbf4/Espl1/Chek1/LOC298795/Mad2l1/Mcm2/Mcm3/Mcm4/Mcm5/Myc/Orc4/Orc5/Pkmyt1/Plk1/Rbl2/Stag1/Tfdp1/Tgfb2	28
rno04068	FoxO signaling pathway	29/923	134/8909	8.6138e-05	0.00208958	0.00167328	Bcl2l11/Bcl6/Bnip3/Ccnb2/Ccnd2/Ccng2/Cdkn1b/Crebbp/Egf/Egfr/Foxo3/Foxo4/Gabarapl1/Irs2/Irs3/Mapk1/Mapk8/Pck1/Pck2/Plk1/Plk3/Prkaa2/Rbl2/S1pr4/Sgk2/Sirt1/Sos1/Tgfb2/Tgfbr1	29
rno01040	Biosynthesis of unsaturated fatty acids	12/923	34/8909	8.97364e-05	0.00208958	0.00167328	Acot2/Acot4/Acot5/Acox1/Elovl5/Elovl6/Fads1/Fads2/LOC681458/Scd/Scd4/Tecr	12
rno04152	AMPK signaling pathway	27/923	124/8909	0.000134151	0.00291556	0.0023347	Acaca/Acacb/Ccna2/Cftr/Cpt1a/Creb3l1/Eef2k/Fasn/Fbp1/Fbp2/Foxo3/Hmgcr/Irs2/Irs3/Lipe/LOC681458/Pck1/Pck2/Pfkfb1/Pfkfb2/Ppargc1a/Prkaa2/Scd/Scd4/Sirt1/Srebf1/Ulk1	27
rno00620	Pyruvate metabolism	14/923	46/8909	0.000149036	0.00303661	0.00243164	Acaca/Acacb/Acat2/Acat2l1/Acss2/Adh1/Adh7/Aldh1b1/Fh/Ldha/Me1/Pck1/Pck2/Pklr	14
rno00830	Retinol metabolism	20/923	86/8909	0.00039081	0.00711464	0.00569723	Adh1/Adh7/Aox3/Cyp2b2/Cyp2c11/Cyp2c22/Cyp2c6v1/Cyp2c7/Cyp3a2/Cyp4a1/Cyp4a2/Cyp4a3/Cyp4a8/Dgat1/Lrat/Rdh11/Rdh5/Retsat/Ugt1a6/Ugt2a3	20
rno00270	Cysteine and methionine metabolism	14/923	50/8909	0.000392833	0.00711464	0.00569723	Agxt2/Ahcy/Apip/Bhmt/Cbs/Got1/Lacc1/Ldha/Mat1a/Phgdh/Psat1/Sds/Sms/Tat	14
rno00280	Valine, leucine and isoleucine degradation	15/923	56/8909	0.000416835	0.00715201	0.00572715	Aacs/Acaa2/Acads/Acadsb/Acat2/Acat2l1/Agxt2/Aldh1b1/Aox3/Hadha/Hadhb/Hmgcs1/Hmgcs2/Oxct1/Oxct2a	15
rno03030	DNA replication	11/923	35/8909	0.000557854	0.00909301	0.00728146	Fen1/Mcm2/Mcm3/Mcm4/Mcm5/Pold1/Pole/Prim1/Rnaseh2b/Rpa1/Rpa3	11
rno00983	Drug metabolism - other enzymes	21/923	96/8909	0.000677591	0.0105188	0.00842318	Ces2/Ces2a/Cyp2e1/Dpyd/Gsta2/Gsta3/Gsta5/Gstm7/Gstt1/Mgst1/Nat2/Nme1/Nme2/Rrm2/Tk1/Tymp/Ugt1a6/Ugt2a3/Umps/Upb1/Upp2	21
rno00630	Glyoxylate and dicarboxylate metabolism	10/923	31/8909	0.000787998	0.011169	0.00894387	Acat2/Acat2l1/Acss2/Afmid/Agxt/Cs/Gldc/Glyctk/Hao1/Pgp	10
rno00640	Propanoate metabolism	10/923	31/8909	0.000787998	0.011169	0.00894387	Acaca/Acacb/Acads/Acox1/Acss2/Echdc1/Hadha/Ldha/Sucla2/Suclg2	10
rno04922	Glucagon signaling pathway	22/923	104/8909	0.000825214	0.0112092	0.00897602	Acaca/Acacb/Calm1/Calml3/Cpt1a/Creb3l1/Crebbp/Fbp1/Fbp2/Gck/Itpr2/Ldha/Pck1/Pck2/Pfkfb1/Ppargc1a/Prkaa2/Prkacb/Pygb/Sik1/Sirt1/Slc2a1	22
rno00240	Pyrimidine metabolism	14/923	54/8909	0.00091743	0.0119633	0.0095799	Cad/Ctps1/Dhodh/Dpyd/Nme1/Nme2/Nt5c2/Rrm2/Tk1/Tymp/Tyms/Umps/Upb1/Upp2	14
rno04950	Maturity onset diabetes of the young	9/923	27/8909	0.00110345	0.0138356	0.0110792	Bhlha15/Foxa2/Gck/Hes1/Hhex/Hnf4g/Nr5a2/Onecut1/Pklr	9
rno00350	Tyrosine metabolism	11/923	38/8909	0.00120378	0.0140995	0.0112906	Adh1/Adh7/Aldh3a1/Aox3/Comt/Ddc/Got1/Hpd/Lrtomt/Mif/Tat	11
rno04146	Peroxisome	19/923	87/8909	0.0012249	0.0140995	0.0112906	Acox1/Acsl3/Acsl4/Acsl5/Agxt/Amacr/Crat/Crot/Ech1/Ephx2/Hacl1/Hao1/Mpv17l/Mvk/Pex11a/Pex19/Pex2/Pmvk/Slc27a2	19
rno04936	Alcoholic liver disease	26/923	135/8909	0.00128657	0.0140995	0.0112906	Acaca/Acacb/Acadvl/Acox1/Adh1/Adh7/Aldh1b1/C3ar1/Cpt1a/Cxcl1/Cyp2e1/Fabp1/Fasn/Foxo3/Ikbke/Lbp/LOC681458/Lpin1/Mapk8/Ppargc1a/Prkaa2/Scd/Scd4/Sirt1/Srebf1/Tcf7l2	26
rno04976	Bile secretion	20/923	94/8909	0.0012975	0.0140995	0.0112906	Abcb1b/Abcc4/Abcg2/Adcy4/Adcy9/Atp1b1/Cftr/Cyp7a1/Ephx1/Fxyd2/Hmgcr/Kcnn2/Ldlr/Nr0b2/Prkacb/Slc2a1/Slc4a4/Sult2a1/Ugt1a6/Ugt2a3	20
rno00260	Glycine, serine and threonine metabolism	11/923	39/8909	0.00152245	0.0160103	0.0128207	Agxt/Agxt2/Bhmt/Cbs/Gcat/Gldc/Glyctk/Chdh/Phgdh/Psat1/Sds	11
rno05204	Chemical carcinogenesis - DNA adducts	17/923	76/8909	0.00164994	0.0168087	0.01346	Cyp2c11/Cyp2c22/Cyp2c6v1/Cyp2c7/Cyp2e1/Cyp3a2/Ephx1/Gsta2/Gsta3/Gsta5/Gstm7/Gstt1/Mgst1/Nat2/Sult2a1/Ugt1a6/Ugt2a3	17
rno00062	Fatty acid elongation	9/923	29/8909	0.00195009	0.0192645	0.0154266	Acaa2/Acot2/Acot4/Acot5/Elovl5/Elovl6/Hadha/Hadhb/Tecr	9
rno00030	Pentose phosphate pathway	9/923	30/8909	0.002534	0.0242966	0.0194561	Aldoc/Fbp1/Fbp2/Glyctk/Idnk/Pgd/Pgm1/Rgn/Tkt	9
rno00982	Drug metabolism - cytochrome P450	16/923	73/8909	0.00278539	0.0253367	0.020289	Adh1/Adh7/Aldh3a1/Aox3/Cyp2e1/Fmo2/Fmo3/Fmo5/Gsta2/Gsta3/Gsta5/Gstm7/Gstt1/Mgst1/Ugt1a6/Ugt2a3	16
rno00250	Alanine, aspartate and glutamate metabolism	10/923	36/8909	0.00279792	0.0253367	0.020289	Agxt/Agxt2/Aldh5a1/Asl/Asns/Ass1/Cad/Gls2/Got1/Gpt	10
rno04750	Inflammatory mediator regulation of TRP channels	22/923	115/8909	0.00320338	0.0278668	0.022315	Adcy4/Adcy9/Bdkrb2/Calm1/Calml3/Cyp2c11/Cyp2c22/Cyp2c6v1/Cyp2c7/Cyp2j4/Cyp4a1/Cyp4a2/Cyp4a3/Cyp4a8/Htr2b/Il1r1/Itpr2/Mapk8/Ntrk1/P2ry2/Prkacb/Prkcg	22
rno00410	beta-Alanine metabolism	9/923	31/8909	0.00324827	0.0278668	0.022315	Acads/Acox1/Aldh1b1/Aldh3a1/Csad/Dpyd/Hadha/Smox/Upb1	9
rno00380	Tryptophan metabolism	12/923	50/8909	0.00419068	0.0350298	0.028051	Acat2/Acat2l1/Afmid/Aldh1b1/Aox3/Asmt/Ddc/Gcdh/Hadha/Inmt/Kmo/Kynu	12
rno00310	Lysine degradation	14/923	63/8909	0.0043815	0.0357092	0.0285951	Aass/Acat2/Acat2l1/Aldh1b1/Bbox1/Gcdh/Hadha/Hykk/Kmt5b/Nsd3/Plod2/Setd1b/Setdb2/Suv39h2	14
rno04978	Mineral absorption	13/923	57/8909	0.00469894	0.0373623	0.0299188	Atp1b1/Atp2b4/Fxyd2/Heph/LOC100360087/Mt1/Mt2A/S100g/Slc31a1/Steap1/Steap2/Trpm6/Vdr	13
rno01230	Biosynthesis of amino acids	16/923	78/8909	0.005559	0.0431485	0.0345522	Aldoc/Asl/Asns/Ass1/Cbs/Cs/Got1/Gpt/Mat1a/Nags/Phgdh/Pklr/Psat1/Pycr1/Sds/Tkt	16
rno00061	Fatty acid biosynthesis	6/923	18/8909	0.00756057	0.0560169	0.0448569	Acaca/Acacb/Acsl3/Acsl4/Acsl5/Fasn	6
rno00360	Phenylalanine metabolism	6/923	18/8909	0.00756057	0.0560169	0.0448569	Aldh3a1/Ddc/Got1/Hpd/Mif/Tat	6
rno00010	Glycolysis / Gluconeogenesis	14/923	68/8909	0.00887919	0.0643248	0.0515097	Acss2/Adh1/Adh7/Aldh1b1/Aldh3a1/Aldoc/Fbp1/Fbp2/Gck/Ldha/Pck1/Pck2/Pgm1/Pklr	14
rno00220	Arginine biosynthesis	6/923	19/8909	0.0100995	0.0710002	0.0568552	Asl/Ass1/Gls2/Got1/Gpt/Nags	6
rno00980	Metabolism of xenobiotics by cytochrome P450	15/923	76/8909	0.0102362	0.0710002	0.0568552	Adh1/Adh7/Aldh3a1/Cyp2e1/Dhdh/Ephx1/Gsta2/Gsta3/Gsta5/Gstm7/Gstt1/Mgst1/Sult2a1/Ugt1a6/Ugt2a3	15
rno05207	Chemical carcinogenesis - receptor activation	35/923	228/8909	0.0110851	0.075286	0.0602871	Adcy4/Adcy9/Aipl1/Bcl6/Creb3l1/Cyp2b2/Cyp3a2/Egf/Egfr/Ephx1/Ephx2/Gsta2/Gsta3/Gsta5/Gstm7/Gstt1/Hsp90b1/Chrnb2/Ikbke/Kpna4/Kpnb1/Mapk1/Mgst1/Myc/Paqr8/Prkacb/Prkcg/Rps6ka6/Sos1/Stat5a/Ugt1a6/Ugt2a3/Vdr/Vegfa/Wnt1	35
rno04934	Cushing syndrome	26/923	158/8909	0.011376	0.0756851	0.0606067	Adcy4/Adcy9/Aipl1/Ccne1/Ccne2/Cdkn1b/Creb3l1/Cyp11a1/Cyp17a1/Cyp21a1/Egfr/Fh/Fzd1/Fzd4/Fzd7/Itpr2/Ldlr/Mapk1/Pbx1/Prkacb/Tcf7l2/Wdr5b/Wnt1/Wnt3/Wnt3a/Wnt9b	26
rno03060	Protein export	7/923	26/8909	0.0141349	0.0911865	0.0730199	Hspa5/MGC109340/Sec11c/Sec61a1/Sec61b/Sec61g/Spcs3	7
rno04913	Ovarian steroidogenesis	12/923	58/8909	0.0142654	0.0911865	0.0730199	Acot2/Acot4/Acot5/Adcy4/Adcy9/Cyp11a1/Cyp17a1/Cyp2j4/Hsd17b2/Hsd17b7/Ldlr/Prkacb	12
rno04920	Adipocytokine signaling pathway	14/923	72/8909	0.0146124	0.0916087	0.0733579	Acacb/Acsl3/Acsl4/Acsl5/Cpt1a/Irs2/Irs3/Mapk8/Pck1/Pck2/Ppargc1a/Prkaa2/Slc2a1/Socs3	14
rno01240	Biosynthesis of cofactors	25/923	154/8909	0.0151751	0.093341	0.0747451	Afmid/Ak4/Aldh1b1/Cad/Ctps1/Dhfr/Dhodh/Gmppb/Gulo/Hpd/Kmo/Kynu/Mat1a/Mmab/Mocs2/Nme1/Nme2/Nqo1/Psat1/Rdh11/Rgn/Ugt1a6/Ugt2a3/Umps/Vkorc1	25
rno04918	Thyroid hormone synthesis	14/923	73/8909	0.0164137	0.0990903	0.079349	Adcy4/Adcy9/Atp1b1/Canx/Creb3l1/Fxyd2/Hsp90b1/Hspa5/Itpr2/Lrp2/Prkacb/Prkcg/Tg/Ttr	14
rno04925	Aldosterone synthesis and secretion	17/923	96/8909	0.0188183	0.111541	0.0893192	Adcy4/Adcy9/Atf1/Atp1b1/Atp2b4/Calm1/Calml3/Camk1g/Creb3l1/Cyp11a1/Cyp21a1/Itpr2/Ldlr/Lipe/Nr4a2/Prkacb/Prkcg	17
rno04390	Hippo signaling pathway	25/923	158/8909	0.0204444	0.119016	0.0953047	Actg1/Birc2/Bmp5/Ccnd2/Crb2/Fzd1/Fzd4/Fzd7/Id2/Lats2/LOC100361457/Mob1a/Mpp5/Myc/Nkd2/Rassf1/Snai2/Tcf7l2/Tead1/Tgfb2/Tgfbr1/Wnt1/Wnt3/Wnt3a/Wnt9b	25
rno00130	Ubiquinone and other terpenoid-quinone biosynthesis	4/923	11/8909	0.0208263	0.119112	0.0953818	Hpd/Nqo1/Tat/Vkorc1	4
rno04964	Proximal tubule bicarbonate reclamation	6/923	22/8909	0.0212346	0.119353	0.095575	Atp1b1/Fxyd2/Gls2/Pck1/Pck2/Slc4a4	6
rno05418	Fluid shear stress and atherosclerosis	24/923	151/8909	0.0216997	0.1199	0.096013	Actg1/Ass1/Calm1/Calml3/Cav2/Ctsl/Gsta2/Gsta3/Gsta5/Gstm7/Gstt1/Hsp90b1/Il1r1/LOC100361457/Mapk8/Mef2a/Mef2c/Mgst1/Ncf1/Nqo1/Pdgfa/Prkaa2/Sqstm1/Vegfa	24
rno04916	Melanogenesis	17/923	99/8909	0.0248732	0.135144	0.10822	Adcy4/Adcy9/Calm1/Calml3/Creb3l1/Crebbp/Fzd1/Fzd4/Fzd7/Mapk1/Prkacb/Prkcg/Tcf7l2/Wnt1/Wnt3/Wnt3a/Wnt9b	17
rno00601	Glycosphingolipid biosynthesis - lacto and neolacto series	7/923	29/8909	0.025535	0.136466	0.109278	Abo/B3galt1/B3gnt2/B3gnt3/Sec1/St3gal3/St8sia1	7
rno00561	Glycerolipid metabolism	12/923	63/8909	0.0264858	0.139264	0.111519	Aldh1b1/Dgat1/Dgkd/Dgkg/Gk/Glyctk/Gpam/Gpat3/Gpat4/Lpin1/Pnpla3/Tkfc	12
rno05202	Transcriptional misregulation in cancer	29/923	194/8909	0.0270301	0.13987	0.112004	Aff1/Atf1/Bcl2l1/Bcl6/Birc2/Ccna2/Ccnd2/Ccnt1/Cdkn1b/Fli1/Flt3/Hhex/Id2/Il2rb/Mef2c/Myc/Ngfr/Nr4a3/Ntrk1/Pax3/Pbx1/Pdgfa/Per2/Rel/Runx1/Sin3a/Slc45a3/Spint1/Wt1	29
rno00051	Fructose and mannose metabolism	8/923	36/8909	0.028127	0.142982	0.114496	Aldoc/Fbp1/Fbp2/Gmppb/Khk/Pfkfb1/Pfkfb2/Tkfc	8
rno00480	Glutathione metabolism	13/923	71/8909	0.0289465	0.142982	0.114496	Ggct/Gsta2/Gsta3/Gsta5/Gstm7/Gstt1/Chac1/Lap3/Mgst1/Nat8f3/Pgd/Rrm2/Sms	13
rno05225	Hepatocellular carcinoma	27/923	179/8909	0.0289472	0.142982	0.114496	Actg1/Bcl2l1/Egfr/Frat1/Fzd1/Fzd4/Fzd7/Gsta2/Gsta3/Gsta5/Gstm7/Gstt1/LOC100361457/Mapk1/Mgst1/Myc/Nqo1/Peg12/Prkcg/Sos1/Tcf7l2/Tgfb2/Tgfbr1/Wnt1/Wnt3/Wnt3a/Wnt9b	27
rno04070	Phosphatidylinositol signaling system	16/923	94/8909	0.0311611	0.15162	0.121413	Calm1/Calml3/Dgkd/Dgkg/Impa2/Inpp1/Inpp4a/Inppl1/Itpr2/Mtmr3/Pi4ka/Pik3c2b/Pik3c2g/Ppip5k1/Prkcg/Synj2	16
rno01250	Biosynthesis of nucleotide sugars	8/923	37/8909	0.0327429	0.155348	0.124399	Gale/Galk1/Gck/Gmppb/Nanp/Nans/Pgm1/Pgm3	8
rno04140	Autophagy - animal	23/923	149/8909	0.0328805	0.155348	0.124399	Atg2a/Atg4a/Bcl2l1/Bnip3/Cflar/Ctsb/Ctsl/Deptor/Eif2ak4/Gabarapl1/Irs2/Irs3/Mapk1/Mapk8/Mtmr3/Nrbf2/Prkaa2/Prkacb/Rras2/Sqstm1/Ulk1/Vmp1/Wdr41	23
rno04630	JAK-STAT signaling pathway	24/923	158/8909	0.0352233	0.162587	0.130195	Aox3/Bcl2l1/Ccnd2/Cish/Crebbp/Egf/Egfr/Epor/Ifnlr1/Il13/Il15/Il2rb/Il4r/Il6st/Il7/Lifr/Myc/Pdgfa/Ptpn2/Socs2/Socs3/Socs7/Sos1/Stat5a	24
rno04115	p53 signaling pathway	13/923	73/8909	0.0355045	0.162587	0.130195	Bcl2l1/Ccnb2/Ccnd2/Ccne1/Ccne2/Ccng2/Cdk1/Chek1/LOC298795/Mdm4/Rprm/Rrm2/Sesn3	13
rno00020	Citrate cycle (TCA cycle)	7/923	31/8909	0.0359087	0.162587	0.130195	Acly/Cs/Fh/Pck1/Pck2/Sucla2/Suclg2	7
rno05226	Gastric cancer	23/923	151/8909	0.0376082	0.167949	0.134489	Abcb1b/Ccne1/Ccne2/Cdkn1b/Cdx2/Egf/Egfr/Frat1/Fzd1/Fzd4/Fzd7/Mapk1/Myc/Peg12/Reg4/Sos1/Tcf7l2/Tgfb2/Tgfbr1/Wnt1/Wnt3/Wnt3a/Wnt9b	23
rno04114	Oocyte meiosis	19/923	120/8909	0.0394161	0.172569	0.138189	Adcy4/Adcy9/Aurka/Bub1/Calm1/Calml3/Ccnb2/Ccne1/Ccne2/Cdk1/Espl1/Itpr2/Mad2l1/Mapk1/Pkmyt1/Plk1/Prkacb/Rec8/Rps6ka6	19
rno04024	cAMP signaling pathway	31/923	217/8909	0.0397015	0.172569	0.138189	Abcc4/Acox1/Adcy10/Adcy4/Adcy9/Adcyap1r1/Afdn/Atp1b1/Atp2b4/Calm1/Calml3/Cftr/Cngb1/Creb3l1/Crebbp/Edn2/F2r/Fxyd2/Hcn4/Lipe/Mapk1/Mapk8/Myl9/Pde4d/Ppp1r12a/Prkacb/Ptger3/Rapgef4/Rras2/Tnni3/Vipr2	31
rno00564	Glycerophospholipid metabolism	16/923	98/8909	0.0437132	0.187507	0.150151	Cept1/Dgkd/Dgkg/Etnk1/Etnppl/Gpam/Gpat3/Gpat4/Lcat/Lpcat3/Lpin1/Phospho1/Pla2g12a/Pla2g15/Pnpla7/Selenoi	16
rno00513	Various types of N-glycan biosynthesis	8/923	40/8909	0.0495971	0.20729	0.165993	Alg11/Alg13/Hexb/Man1a1/Mgat2/Rpn1/St3gal3/Stt3a	8
rno00591	Linoleic acid metabolism	8/923	40/8909	0.0495971	0.20729	0.165993	Cyp2c11/Cyp2c22/Cyp2c6v1/Cyp2c7/Cyp2e1/Cyp2j4/Cyp3a2/Pla2g12a	8

## Sheet: Liver TiO2NPs
ID	Description	GeneRatio	BgRatio	pvalue	p.adjust	qvalue	geneID	Count
rno03320	PPAR signaling pathway	17/290	86/8909	1.7007e-09	4.98304e-07	4.40391e-07	Acsbg1/Angptl4/Apoa5/Cpt1a/Cyp7a1/Cyp8b1/Dbi/Fabp5/Fabp7/LOC681458/Me1/Pck1/Ppard/Pparg/Scd/Scd2/Scd4	17
rno04145	Phagosome	24/290	185/8909	6.08638e-09	8.91654e-07	7.88026e-07	Atp6v0a1/Calr/Cd14/Fcgr3a/RT1-A1/RT1-A2/RT1-Bb/RT1-CE11/RT1-CE13/RT1-CE14/RT1-CE16/RT1-CE2/RT1-CE4/RT1-CE7/RT1-T18/RT1-T24-1/RT1-T24-4/Sec61a1/Tfrc/Tuba1a/Tuba1b/Tuba4a/Tubb1/Tubb6	24
rno01212	Fatty acid metabolism	13/290	61/8909	5.69131e-08	4.09829e-06	3.62199e-06	Acaa2/Acaca/Acat2/Acsbg1/Cpt1a/Elovl5/Elovl6/Fads1/Fasn/LOC681458/Scd/Scd2/Scd4	13
rno05332	Graft-versus-host disease	13/290	61/8909	5.69131e-08	4.09829e-06	3.62199e-06	RT1-A1/RT1-A2/RT1-Bb/RT1-CE11/RT1-CE13/RT1-CE14/RT1-CE16/RT1-CE2/RT1-CE4/RT1-CE7/RT1-T18/RT1-T24-1/RT1-T24-4	13
rno05330	Allograft rejection	13/290	62/8909	6.99367e-08	4.09829e-06	3.62199e-06	RT1-A1/RT1-A2/RT1-Bb/RT1-CE11/RT1-CE13/RT1-CE14/RT1-CE16/RT1-CE2/RT1-CE4/RT1-CE7/RT1-T18/RT1-T24-1/RT1-T24-4	13
rno04612	Antigen processing and presentation	15/290	87/8909	1.08385e-07	5.2928e-06	4.67767e-06	Calr/Hspa5/RT1-A1/RT1-A2/RT1-Bb/RT1-CE11/RT1-CE13/RT1-CE14/RT1-CE16/RT1-CE2/RT1-CE4/RT1-CE7/RT1-T18/RT1-T24-1/RT1-T24-4	15
rno04940	Type I diabetes mellitus	13/290	69/8909	2.65131e-07	1.10976e-05	9.80786e-06	RT1-A1/RT1-A2/RT1-Bb/RT1-CE11/RT1-CE13/RT1-CE14/RT1-CE16/RT1-CE2/RT1-CE4/RT1-CE7/RT1-T18/RT1-T24-1/RT1-T24-4	13
rno05320	Autoimmune thyroid disease	13/290	71/8909	3.75947e-07	1.37691e-05	1.21688e-05	RT1-A1/RT1-A2/RT1-Bb/RT1-CE11/RT1-CE13/RT1-CE14/RT1-CE16/RT1-CE2/RT1-CE4/RT1-CE7/RT1-T18/RT1-T24-1/RT1-T24-4	13
rno04218	Cellular senescence	21/290	185/8909	5.5964e-07	1.82194e-05	1.61019e-05	Cdk1/Foxm1/Foxo3/Itpr2/Kras/Lin37/Ppp1cb/Rbl2/RT1-A1/RT1-A2/RT1-CE11/RT1-CE13/RT1-CE14/RT1-CE16/RT1-CE2/RT1-CE4/RT1-CE7/RT1-T18/RT1-T24-1/RT1-T24-4/Tp53	21
rno05203	Viral carcinogenesis	23/290	221/8909	7.61649e-07	2.23163e-05	1.97227e-05	Cdk1/Cdkn1b/Creb3l1/Gtf2b/Il6st/Jak3/Kras/Polb/Rbl2/RT1-A1/RT1-A2/RT1-CE11/RT1-CE13/RT1-CE14/RT1-CE16/RT1-CE2/RT1-CE4/RT1-CE7/RT1-T18/RT1-T24-1/RT1-T24-4/Snw1/Tp53	23
rno04936	Alcoholic liver disease	17/290	135/8909	1.6321e-06	4.34733e-05	3.84208e-05	Acaca/C2/Cd14/Cpt1a/Cxcl1/Cyp2e1/Fasn/Foxo3/Irak1/Lbp/Lef1/LOC681458/Lpin1/Scd/Scd2/Scd4/Srebf1	17
rno05416	Viral myocarditis	13/290	85/8909	3.17584e-06	7.75435e-05	6.85313e-05	RT1-A1/RT1-A2/RT1-Bb/RT1-CE11/RT1-CE13/RT1-CE14/RT1-CE16/RT1-CE2/RT1-CE4/RT1-CE7/RT1-T18/RT1-T24-1/RT1-T24-4	13
rno04152	AMPK signaling pathway	15/290	124/8909	1.10976e-05	0.000250123	0.000221053	Acaca/Cpt1a/Creb3l1/Fasn/Fbp2/Foxo3/Insr/LOC681458/Pck1/Pparg/Ppp2r1a/Scd/Scd2/Scd4/Srebf1	15
rno05169	Epstein-Barr virus infection	21/290	226/8909	1.39618e-05	0.000292201	0.000258241	Calr/Cdkn1b/Irak1/Jak3/RT1-A1/RT1-A2/RT1-Bb/RT1-CE11/RT1-CE13/RT1-CE14/RT1-CE16/RT1-CE2/RT1-CE4/RT1-CE7/RT1-T18/RT1-T24-1/RT1-T24-4/Snw1/Stat1/Tp53/Vim	21
rno01200	Carbon metabolism	14/290	119/8909	2.9992e-05	0.000585843	0.000517756	Acat2/Acss2/Dlat/Fbp2/G6pd/Gapdh/Gck/Got1/LOC303448/Me1/Phgdh/Pklr/Sds/Tkt	14
rno05167	Kaposi sarcoma-associated herpesvirus infection	19/290	216/8909	7.63769e-05	0.00139865	0.0012361	Cxcl1/Il6st/Itpr2/Kras/Lef1/RT1-A1/RT1-A2/RT1-CE11/RT1-CE13/RT1-CE14/RT1-CE16/RT1-CE2/RT1-CE4/RT1-CE7/RT1-T18/RT1-T24-1/RT1-T24-4/Stat1/Tp53	19
rno01040	Biosynthesis of unsaturated fatty acids	7/290	34/8909	9.09725e-05	0.00156794	0.00138571	Elovl5/Elovl6/Fads1/LOC681458/Scd/Scd2/Scd4	7
rno00620	Pyruvate metabolism	8/290	46/8909	0.000101681	0.00165514	0.00146278	Acaca/Acat2/Acot12/Acss2/Dlat/Me1/Pck1/Pklr	8
rno05166	Human T-cell leukemia virus 1 infection	20/290	249/8909	0.000173907	0.00268182	0.00237014	Calr/Creb3l1/Fdps/Jak3/Kras/Polb/RT1-A1/RT1-A2/RT1-Bb/RT1-CE11/RT1-CE13/RT1-CE14/RT1-CE16/RT1-CE2/RT1-CE4/RT1-CE7/RT1-T18/RT1-T24-1/RT1-T24-4/Tp53	20
rno04950	Maturity onset diabetes of the young	6/290	27/8909	0.000187634	0.00274884	0.00242937	Bhlha15/Foxa3/Gck/Hhex/Hnf1a/Pklr	6
rno00010	Glycolysis / Gluconeogenesis	9/290	68/8909	0.000330591	0.00461253	0.00407646	Acss2/Dlat/Fbp2/Galm/Gapdh/Gck/LOC303448/Pck1/Pklr	9
rno00100	Steroid biosynthesis	5/290	20/8909	0.000366004	0.00487451	0.00430799	Cyp51/Dhcr7/Ebp/Lss/Nsdhl	5
rno04514	Cell adhesion molecules	15/290	172/8909	0.000475837	0.00606175	0.00535725	Cldn1/Pvr/RT1-A1/RT1-A2/RT1-Bb/RT1-CE11/RT1-CE13/RT1-CE14/RT1-CE16/RT1-CE2/RT1-CE4/RT1-CE7/RT1-T18/RT1-T24-1/RT1-T24-4	15
rno04540	Gap junction	10/290	87/8909	0.000498776	0.00608922	0.00538153	Cdk1/Gucy1a1/Gucy1a2/Itpr2/Kras/Tuba1a/Tuba1b/Tuba4a/Tubb1/Tubb6	10
rno01230	Biosynthesis of amino acids	9/290	78/8909	0.000921148	0.0107959	0.00954116	Bcat2/Gapdh/Got1/LOC303448/Phgdh/Pklr/Pycr1/Sds/Tkt	9
rno00900	Terpenoid backbone biosynthesis	5/290	25/8909	0.00109751	0.0123681	0.0109307	Acat2/Fdps/Icmt/Mvd/Nus1	5
rno05163	Human cytomegalovirus infection	18/290	248/8909	0.00120715	0.0130998	0.0115774	Calr/Creb3l1/Cxcl12/Itpr2/Kras/RT1-A1/RT1-A2/RT1-CE11/RT1-CE13/RT1-CE14/RT1-CE16/RT1-CE2/RT1-CE4/RT1-CE7/RT1-T18/RT1-T24-1/RT1-T24-4/Tp53	18
rno04068	FoxO signaling pathway	12/290	134/8909	0.00137389	0.0143768	0.0127059	Bnip3/Cdkn1b/Foxo3/Il7r/Insr/Kras/Nlk/Pck1/Plk1/Plk3/Rbl2/Sgk2	12
rno04144	Endocytosis	19/290	274/8909	0.00152227	0.0153801	0.0135926	Fgfr4/Chmp4bl1/Pip5k1a/RT1-A1/RT1-A2/RT1-CE11/RT1-CE13/RT1-CE14/RT1-CE16/RT1-CE2/RT1-CE4/RT1-CE7/RT1-T18/RT1-T24-1/RT1-T24-4/Rufy2/Stam/Tfrc/Vps37b	19
rno05170	Human immunodeficiency virus 1 infection	17/290	234/8909	0.00162445	0.0158655	0.0140216	Calr/Cdk1/Irak1/Itpr2/Kras/RT1-A1/RT1-A2/RT1-CE11/RT1-CE13/RT1-CE14/RT1-CE16/RT1-CE2/RT1-CE4/RT1-CE7/RT1-T18/RT1-T24-1/RT1-T24-4	17
rno05165	Human papillomavirus infection	22/290	353/8909	0.00260017	0.0245758	0.0217196	Atp6v0a1/Cdkn1b/Creb3l1/Fzd1/Hes6/Kras/Ppp2r1a/Rbl2/RT1-A1/RT1-A2/RT1-CE11/RT1-CE13/RT1-CE14/RT1-CE16/RT1-CE2/RT1-CE4/RT1-CE7/RT1-T18/RT1-T24-1/RT1-T24-4/Stat1/Tp53	22
rno05132	Salmonella infection	17/290	254/8909	0.00383214	0.0350881	0.0310101	Anxa2/Casp4/Casp7/Cd14/Flna/Fyco1/Gapdh/Irak1/Lef1/LOC303448/Pik3c2g/Rhob/Tuba1a/Tuba1b/Tuba4a/Tubb1/Tubb6	17
rno05216	Thyroid cancer	5/290	38/8909	0.00734676	0.0652304	0.0576493	Kras/Lef1/Pparg/Tfg/Tp53	5
rno04211	Longevity regulating pathway	8/290	90/8909	0.00880933	0.0759157	0.0670927	Creb3l1/Foxo3/Insr/Kras/Pparg/Sesn1/Sesn2/Tp53	8
rno04210	Apoptosis	10/290	136/8909	0.0131836	0.110366	0.097539	Casp12/Casp7/Dab2ip/Hrk/Itpr2/Kras/Tp53/Tuba1a/Tuba1b/Tuba4a	10
rno04910	Insulin signaling pathway	10/290	139/8909	0.0151832	0.123574	0.109212	Acaca/Fasn/Fbp2/Gck/Insr/Kras/Pck1/Pklr/Ppp1cb/Srebf1	10
rno00061	Fatty acid biosynthesis	3/290	18/8909	0.0193851	0.149469	0.132098	Acaca/Acsbg1/Fasn	3
rno00120	Primary bile acid biosynthesis	3/290	18/8909	0.0193851	0.149469	0.132098	Amacr/Cyp7a1/Cyp8b1	3
rno00270	Cysteine and methionine metabolism	5/290	50/8909	0.0226421	0.170106	0.150336	Bcat2/Got1/Mtap/Phgdh/Sds	5
rno05168	Herpes simplex virus 1 infection	20/290	384/8909	0.0255024	0.186805	0.165094	Calr/Irak1/Ppp1cb/RT1-A1/RT1-A2/RT1-Bb/RT1-CE11/RT1-CE13/RT1-CE14/RT1-CE16/RT1-CE2/RT1-CE4/RT1-CE7/RT1-T18/RT1-T24-1/RT1-T24-4/Srsf5/Stat1/Tp53/Zfp180	20
rno05204	Chemical carcinogenesis - DNA adducts	6/290	76/8909	0.0369173	0.263824	0.233162	Cyp2e1/Cyp3a2/Cyp3a23-3a1/Ephx1/Gstm6l/Nat2	6
rno00920	Sulfur metabolism	2/290	10/8909	0.0399861	0.27334	0.241572	Bpnt2/Sqor	2
rno00591	Linoleic acid metabolism	4/290	40/8909	0.0401147	0.27334	0.241572	Cyp2e1/Cyp3a2/Cyp3a23-3a1/Pla2g12a	4
rno04114	Oocyte meiosis	8/290	120/8909	0.0418005	0.278353	0.246003	Aurka/Bub1/Cdk1/Cpeb2/Itpr2/Plk1/Ppp1cb/Ppp2r1a	8
rno05219	Bladder cancer	4/290	41/8909	0.0433557	0.282294	0.249485	Kras/Rassf1/Tp53/Upk3a	4
rno00340	Histidine metabolism	3/290	25/8909	0.0462761	0.294759	0.260502	Amdhd1/Aspa/Hal	3
rno04730	Long-term depression	5/290	61/8909	0.0478007	0.297992	0.263359	Gucy1a1/Gucy1a2/Itpr2/Kras/Ppp2r1a	5

## Sheet: Liver shared genes
ID	Description	GeneRatio	BgRatio	pvalue	p.adjust	qvalue	geneID	Count
rno01212	Fatty acid metabolism	11/137	61/8909	1.64819e-09	3.77436e-07	3.31373e-07	Scd4/Scd/LOC681458/Fasn/Fads1/Elovl6/Elovl5/Cpt1a/Acat2/Acaca/Acaa2	11
rno03320	PPAR signaling pathway	11/137	86/8909	6.95605e-08	7.96468e-06	6.99266e-06	Scd4/Scd/Pck1/Me1/LOC681458/Fabp5/Dbi/Cyp8b1/Cyp7a1/Cpt1a/Apoa5	11
rno04936	Alcoholic liver disease	12/137	135/8909	9.94232e-07	7.5893e-05	6.6631e-05	Srebf1/Scd4/Scd/Lpin1/LOC681458/Lbp/Foxo3/Fasn/Cyp2e1/Cxcl1/Cpt1a/Acaca	12
rno04152	AMPK signaling pathway	11/137	124/8909	2.92645e-06	0.000167539	0.000147092	Srebf1/Scd4/Scd/Pck1/LOC681458/Foxo3/Fbp2/Fasn/Creb3l1/Cpt1a/Acaca	11
rno00100	Steroid biosynthesis	5/137	20/8909	1.02922e-05	0.000426856	0.000374762	Nsdhl/Lss/Ebp/Dhcr7/Cyp51	5
rno01040	Biosynthesis of unsaturated fatty acids	6/137	34/8909	1.1184e-05	0.000426856	0.000374762	Scd4/Scd/LOC681458/Fads1/Elovl6/Elovl5	6
rno01200	Carbon metabolism	10/137	119/8909	1.36246e-05	0.00044572	0.000391324	Tkt/Sds/Pklr/Phgdh/Me1/Got1/Gck/Fbp2/Acss2/Acat2	10
rno00620	Pyruvate metabolism	6/137	46/8909	6.69505e-05	0.00191646	0.00168257	Pklr/Pck1/Me1/Acss2/Acat2/Acaca	6
rno04950	Maturity onset diabetes of the young	4/137	27/8909	0.000713582	0.0181567	0.0159408	Pklr/Hhex/Gck/Bhlha15	4
rno04068	FoxO signaling pathway	8/137	134/8909	0.00104466	0.022324	0.0195995	Sgk2/Rbl2/Plk3/Plk1/Pck1/Foxo3/Cdkn1b/Bnip3	8
rno04922	Glucagon signaling pathway	7/137	104/8909	0.00107233	0.022324	0.0195995	Pck1/Itpr2/Gck/Fbp2/Creb3l1/Cpt1a/Acaca	7
rno01230	Biosynthesis of amino acids	6/137	78/8909	0.00122836	0.0234413	0.0205805	Tkt/Sds/Pycr1/Pklr/Phgdh/Got1	6
rno04540	Gap junction	6/137	87/8909	0.00215805	0.0380149	0.0333755	Tubb6/Tuba4a/Tuba1b/Tuba1a/Itpr2/Cdk1	6
rno00120	Primary bile acid biosynthesis	3/137	18/8909	0.00245114	0.0400936	0.0352005	Cyp8b1/Cyp7a1/Amacr	3
rno00010	Glycolysis / Gluconeogenesis	5/137	68/8909	0.00383551	0.0585555	0.0514093	Pklr/Pck1/Gck/Fbp2/Acss2	5
rno04910	Insulin signaling pathway	7/137	139/8909	0.00553079	0.0791594	0.0694987	Srebf1/Pklr/Pck1/Gck/Fbp2/Fasn/Acaca	7
rno00900	Terpenoid backbone biosynthesis	3/137	25/8909	0.00638757	0.0860443	0.0755434	Mvd/Fdps/Acat2	3
rno00062	Fatty acid elongation	3/137	29/8909	0.00970479	0.123467	0.108399	Elovl6/Elovl5/Acaa2	3
rno00630	Glyoxylate and dicarboxylate metabolism	3/137	31/8909	0.0116755	0.14072	0.123546	Afmid/Acss2/Acat2	3
rno00350	Tyrosine metabolism	3/137	38/8909	0.020274	0.227796	0.199995	Mif/Got1/Comt	3
rno04928	Parathyroid hormone synthesis, secretion and action	5/137	105/8909	0.02269	0.227796	0.199995	Nr4a2/Mef2a/Mafb/Itpr2/Creb3l1	5
rno00591	Linoleic acid metabolism	3/137	40/8909	0.0232248	0.227796	0.199995	Pla2g12a/Cyp3a2/Cyp2e1	3
rno05012	Parkinson disease	9/137	270/8909	0.0232591	0.227796	0.199995	Xbp1/Uba7/Tubb6/Tuba4a/Tuba1b/Tuba1a/Pink1/Itpr2/Hspa5	9
rno04145	Phagosome	7/137	185/8909	0.0238738	0.227796	0.199995	Tubb6/Tuba4a/Tuba1b/Tuba1a/Tfrc/Sec61a1/Calr	7
rno04918	Thyroid hormone synthesis	4/137	73/8909	0.0257491	0.235862	0.207077	Itpr2/Hspa5/Creb3l1/Atp1b1	4
rno04931	Insulin resistance	5/137	110/8909	0.0270817	0.238527	0.209417	Trib3/Srebf1/Pck1/Creb3l1/Cpt1a	5
rno05204	Chemical carcinogenesis - DNA adducts	4/137	76/8909	0.0293111	0.241463	0.211995	Nat2/Ephx1/Cyp3a2/Cyp2e1	4
rno00061	Fatty acid biosynthesis	2/137	18/8909	0.0305783	0.241463	0.211995	Fasn/Acaca	2
rno00360	Phenylalanine metabolism	2/137	18/8909	0.0305783	0.241463	0.211995	Mif/Got1	2
rno05022	Pathways of neurodegeneration - multiple diseases	13/137	477/8909	0.0316713	0.241757	0.212253	Xbp1/Uba7/Tubb6/Tuba4a/Tuba1b/Tuba1a/Pink1/Peg12/Nrbf2/Itpr2/Hspa5/Fzd1/Casp7	13
rno04114	Oocyte meiosis	5/137	120/8909	0.0374056	0.272178	0.238961	Plk1/Itpr2/Cdk1/Bub1/Aurka	5
rno00140	Steroid hormone biosynthesis	4/137	83/8909	0.0387099	0.272178	0.238961	Cyp7a1/Cyp3a2/Cyp2e1/Comt	4
rno00071	Fatty acid degradation	3/137	49/8909	0.0392222	0.272178	0.238961	Cpt1a/Acat2/Acaa2	3
rno00270	Cysteine and methionine metabolism	3/137	50/8909	0.0412705	0.272689	0.23941	Sds/Phgdh/Got1	3
rno04061	Viral protein interaction with cytokine and cytokine receptor	4/137	85/8909	0.0416774	0.272689	0.23941	Il6st/Cxcl9/Cxcl12/Cxcl1	4
rno00430	Taurine and hypotaurine metabolism	2/137	22/8909	0.044368	0.274602	0.241089	Fmo3/Fmo2	2
rno04964	Proximal tubule bicarbonate reclamation	2/137	22/8909	0.044368	0.274602	0.241089	Pck1/Atp1b1	2
rno04110	Cell cycle	5/137	127/8909	0.0458965	0.276587	0.242832	Rbl2/Plk1/Cdkn1b/Cdk1/Bub1	5
