# Supplementary material for: Gold and titania nanoparticles accumulated in the body induce late toxic effects and alterations in transcriptional and miRNA landscape
Source: Royal Society of Chemistry journal article supplement (doi:10.1039/d3en00954h), 2024-01-01
Supplement: d3en00954h13.xlsx [file d3en00954h13.xlsx]

## Sheet: miRNA Lung
AuNPs	p value	FC	Regulation
rno-miR-450b-3p	0.0295407	1.50549	up
rno-miR-6216	0.00395768	-5.16774	down
TiO2NPs	p value	FC	Regulation
rno-miR-223-3p	0.00189884	1.53407	up
rno-miR-144-5p	0.0177628	1.80259	up
rno-miR-299a-3p	0.0295107	1.84213	up
rno-miR-486	0.0033163	2.07568	up
rno-miR-451-5p	0.0192583	2.2302	up
rno-miR-29b-5p	0.0288268	-1.52245	down

## Sheet: miRNA Liver
AuNPs	p value	FC	Regulation
rno-miR-1949	0.00157467	1.93549	up
rno-miR-203a-3p	0.0151014	-1.70251	down
TiO2NPs	p value	FC	Regulation
rno-miR-135b-3p	0.0174769	1.53295	up
rno-miR-125b-1-3p	0.0279359	1.57592	up
rno-miR-3558-3p	0.0359489	1.59822	up
rno-miR-6328	0.0275567	1.60903	up
rno-miR-3084a-3p	0.00342516	1.61526	up
rno-miR-1843b-3p	0.00628459	1.65622	up
rno-miR-409a-3p	0.0292546	1.7353	up
rno-miR-3085	0.0336824	1.75326	up
rno-miR-32-3p	0.0388602	1.84465	up
rno-miR-3564	0.0235653	1.84817	up
rno-miR-466c-5p	0.0134965	1.93787	up
rno-miR-465-5p	0.0451184	2.23496	up
rno-miR-203a-3p	0.0151014	-2.28706	down
rno-miR-342-3p	0.00309651	-1.84503	down
rno-miR-128-3p	0.0245818	-1.67923	down
rno-miR-125b-5p	0.0256077	-1.54335	down

## Sheet: miRNA Kidney
AuNPs	p value	FC	Regulation
rno-miR-301a-3p	0.0123486	1.51861	up
rno-miR-18a-5p	0.0247507	1.54978	up
rno-miR-32-5p	0.0340042	1.58493	up
rno-miR-340-5p	0.0323154	1.59296	up
rno-miR-182	0.0253523	1.72519	up
rno-miR-96-5p	0.027567	1.86805	up
rno-miR-183-5p	0.0313413	1.88344	up
rno-miR-466b-3p	0.0464179	-2.862	down
rno-miR-494-3p	0.0296333	-2.51888	down
rno-miR-3075	0.0286635	-2.34355	down
rno-miR-466b-2-3p	0.0477138	-2.13672	down
rno-miR-188-5p	0.0349273	-2.00435	down
rno-miR-211-3p	0.0232865	-1.78318	down
rno-miR-1306-3p	0.00233051	-1.67446	down
TiO2NPs	p value	FC	Regulation
rno-miR-374-5p	0.0240246	1.50496	up
rno-miR-542-3p	0.00118873	1.50586	up
rno-miR-450b-5p	0.0227638	1.51201	up
rno-miR-151-3p	0.0184203	1.51856	up
rno-miR-148a-3p	0.00879677	1.55092	up
rno-miR-32-5p	0.0340042	1.56913	up
rno-miR-322-3p	0.00622206	1.59645	up
rno-miR-18a-5p	0.0247507	1.62474	up
rno-miR-17-1-3p	0.0169171	1.63568	up
rno-miR-450a-5p	0.0117073	1.6806	up
rno-miR-153-3p	0.0137602	1.78168	up
rno-miR-142-5p	0.0103897	1.97139	up
rno-miR-466b-3p	0.0464179	-3.76645	down
rno-miR-494-3p	0.0296333	-2.97994	down
rno-miR-466b-2-3p	0.0477138	-2.52251	down
rno-miR-188-5p	0.0349273	-2.50889	down
rno-miR-3075	0.0286635	-2.21614	down
rno-miR-1306-3p	0.00233051	-1.99266	down
rno-miR-92b-5p	0.0197911	-1.92079	down
rno-miR-138-1-3p	0.02062	-1.91121	down
rno-miR-325-5p	0.0372491	-1.82556	down
rno-miR-211-3p	0.0232865	-1.71619	down
